# Supplementary material for: Fast Local Laplacian‐Based Steerable and Sobel Filters Integrated with Adaptive Boosting Classification Tree for Automatic Recognition of Asphalt Pavement Cracks
Source: Hindawi journal article supplement (doi:10.1155/2018/5989246), 2018-01-01
Supplement: f1 [file 5989246.f1.xlsx]

## Sheet: STF
Feature 1	Feature 2	Feature 3	Feature 4	Feature 5	Feature 6	Feature 7	Feature 8	Feature 9	Feature 10	Feature 11	Feature 12	Feature 13	Feature 14	Feature 15	Feature 16	Feature 17	Feature 18	Feature 19	Feature 20	Feature 21	Feature 22	Feature 23	Feature 24	Feature 25	Feature 26	Feature 27	Feature 28	Feature 29	Feature 30	Feature 31	Feature 32	Feature 33	Feature 34	Feature 35	Feature 36	Feature 37	Feature 38	Feature 39	Feature 40	Class labels
0.3291	0.34094	0.25766	0.24375	0.25704	0.39577	0.44963	0.32796	0.27217	0.42976	0.25119	0.24693	0.2665	0.50845	0.3871	0.26369	0.37846	0.34958	0.34156	0.31573	0.050839	0.07553	0.17512	0.21804	0.28578	0.32687	0.2168	0.15913	0.12518	0.02067	0.032828	0.091704	0.11652	0.18777	0.29836	0.28139	0.28801	0.21882	0.12611	0.012806	1
0.34932	0.39684	0.21025	0.17582	0.15823	0.32854	0.4693	0.3224	0.30004	0.54066	0.3898	0.26076	0.25438	0.24471	0.25556	0.44821	0.46229	0.24718	0.3646	0.35471	0.057418	0.15023	0.13366	0.17743	0.28705	0.30449	0.25525	0.13525	0.080747	0.051549	0.042967	0.090081	0.10132	0.1717	0.27644	0.32418	0.22527	0.20757	0.12781	0.066231	1
0.17045	0.268	0.32711	0.36601	0.31116	0.22474	0.21201	0.24416	0.45549	0.40845	0.21967	0.18003	0.20246	0.29236	0.49334	0.34416	0.29	0.30619	0.32923	0.33433	0.039667	0.066056	0.13753	0.21975	0.29571	0.22858	0.21984	0.20461	0.079108	0.015045	0.019401	0.021709	0.13812	0.21032	0.21455	0.30017	0.24452	0.1791	0.12135	0.053455	1
0.27799	0.32496	0.40822	0.2398	0.1851	0.1686	0.28415	0.48653	0.34168	0.28111	0.25641	0.18854	0.1781	0.20332	0.29971	0.49543	0.35688	0.30755	0.35542	0.3635	0.042887	0.072405	0.099018	0.18114	0.28417	0.28994	0.19179	0.13082	0.16068	0.040341	0.0060097	0.067399	0.11721	0.18689	0.26665	0.29331	0.21333	0.18526	0.10753	0.050439	1
0.30515	0.31664	0.25555	0.25542	0.28548	0.43125	0.42112	0.32003	0.2911	0.43043	0.25497	0.25296	0.3623	0.51127	0.25458	0.32194	0.37281	0.3453	0.3101	0.31572	0.054736	0.079381	0.17887	0.22673	0.27641	0.33778	0.20661	0.16775	0.10941	0.017069	0.041862	0.087124	0.092456	0.22397	0.27325	0.30671	0.28595	0.23306	0.088848	0.020351	1
0.401	0.39477	0.3426	0.26609	0.29415	0.43716	0.33917	0.2992	0.38491	0.49157	0.36196	0.39034	0.43812	0.35015	0.34505	0.31961	0.3672	0.41168	0.32698	0.32202	0.04101	0.11024	0.19732	0.28924	0.3363	0.29034	0.22011	0.22581	0.090899	0.030591	0.039729	0.10594	0.22378	0.25665	0.25438	0.27359	0.31629	0.18785	0.1292	0.037944	1
0.295	0.38109	0.40586	0.29609	0.20518	0.26867	0.33746	0.4203	0.30448	0.36707	0.4107	0.33657	0.29957	0.34463	0.38151	0.33143	0.313	0.29511	0.29229	0.28824	0.023896	0.10855	0.17396	0.21409	0.2943	0.38894	0.225	0.11752	0.071053	0.025676	0.049168	0.13586	0.20035	0.19735	0.20876	0.29979	0.21612	0.16185	0.14101	0.031775	1
0.15365	0.24158	0.40186	0.39992	0.31657	0.21367	0.26047	0.31826	0.4431	0.33233	0.43625	0.4066	0.27966	0.26297	0.32638	0.33891	0.2955	0.25116	0.23599	0.2545	0.045674	0.11524	0.15404	0.1944	0.3385	0.38372	0.17254	0.098086	0.044935	0.0054124	0.038326	0.12189	0.16251	0.22447	0.2387	0.2176	0.24033	0.15563	0.088354	0.05468	1
0.37702	0.39548	0.3068	0.28365	0.29624	0.41178	0.37411	0.30057	0.36822	0.49559	0.38298	0.42335	0.36199	0.34925	0.32087	0.35572	0.41858	0.33763	0.32507	0.31679	0.049417	0.10629	0.20695	0.29711	0.2754	0.28839	0.27888	0.19695	0.061948	0.03751	0.034018	0.11864	0.23278	0.22792	0.2413	0.29254	0.30364	0.17777	0.13063	0.037511	1
0.40287	0.37831	0.22786	0.2354	0.29785	0.4327	0.35742	0.34599	0.40923	0.43476	0.43633	0.348	0.34501	0.313	0.37698	0.40783	0.32864	0.32701	0.32045	0.30754	0.047451	0.12771	0.2071	0.25051	0.2843	0.29208	0.30311	0.1507	0.051794	0.045085	0.033878	0.13931	0.18934	0.19256	0.26583	0.34886	0.23335	0.20374	0.12977	0.028684	1
0.2237	0.3453	0.50805	0.22011	0.22471	0.41501	0.50114	0.34971	0.33292	0.33483	0.30782	0.28315	0.26273	0.27163	0.31743	0.45734	0.39075	0.31144	0.41273	0.43688	0.012914	0.090292	0.14566	0.25008	0.23722	0.36142	0.31963	0.20539	0.084959	0.0065561	0.024613	0.11781	0.12378	0.21881	0.25638	0.32025	0.23449	0.20698	0.16426	0.054822	1
0.21694	0.2138	0.41072	0.49277	0.34958	0.33331	0.37648	0.45204	0.50989	0.39525	0.32836	0.24751	0.29212	0.31982	0.46584	0.44419	0.28168	0.40725	0.49385	0.48571	0.05236	0.1273	0.18983	0.23003	0.35023	0.2581	0.25777	0.24014	0.15508	0.016297	0.0065885	0.037435	0.13637	0.24437	0.31815	0.36633	0.36591	0.20213	0.13776	0.059012	1
0.42368	0.20541	0.2872	0.52306	0.41306	0.33016	0.3589	0.33977	0.53927	0.45006	0.39251	0.28771	0.26984	0.31955	0.40375	0.53355	0.36925	0.34698	0.46268	0.50108	0.058979	0.11928	0.20667	0.24417	0.33714	0.25726	0.25865	0.25006	0.15847	0.036814	0.035256	0.060205	0.14207	0.23031	0.36783	0.31557	0.37376	0.23598	0.12245	0.05364	1
0.40436	0.45678	0.20411	0.24903	0.49642	0.44407	0.35148	0.35579	0.34801	0.52486	0.34165	0.28251	0.27946	0.30707	0.41686	0.51984	0.36028	0.3622	0.47098	0.50056	0.044623	0.094804	0.18724	0.26481	0.26826	0.31867	0.33732	0.2497	0.10768	0.039486	0.038405	0.092377	0.14413	0.235	0.31033	0.33189	0.27134	0.26846	0.14268	0.067552	1
0.21478	0.46943	0.39606	0.20295	0.30557	0.52893	0.41219	0.33339	0.35533	0.34339	0.32085	0.29073	0.26066	0.24903	0.32735	0.48477	0.40257	0.32385	0.42146	0.4482	0.030863	0.080777	0.15374	0.26137	0.22642	0.33967	0.31759	0.22182	0.10515	0.015412	0.020003	0.11415	0.12065	0.2299	0.26647	0.35415	0.21758	0.23858	0.14726	0.046993	1
0.3601	0.45146	0.33114	0.43519	0.40096	0.34488	0.42063	0.34592	0.35041	0.30932	0.36373	0.3137	0.2939	0.39766	0.48833	0.35461	0.34256	0.47179	0.36924	0.35055	0.04706	0.084919	0.18738	0.19095	0.34378	0.35793	0.28142	0.17834	0.16431	0.036671	0.024471	0.074537	0.19352	0.30192	0.37698	0.33856	0.25985	0.1444	0.1135	0.043919	1
0.36126	0.42666	0.26154	0.41408	0.41859	0.32929	0.42997	0.38825	0.35105	0.27799	0.27254	0.33207	0.34279	0.29006	0.32516	0.48152	0.43832	0.31522	0.44507	0.42306	0.012333	0.13058	0.14988	0.24269	0.22489	0.37799	0.29661	0.19014	0.11961	0.074068	0.022352	0.063245	0.13835	0.3037	0.35178	0.3803	0.24376	0.18231	0.083874	0.058081	1
0.34555	0.45841	0.3133	0.37729	0.40249	0.37191	0.2546	0.37722	0.38103	0.28436	0.2932	0.31385	0.4169	0.29943	0.3342	0.36296	0.37524	0.3783	0.40112	0.40908	0.044541	0.077649	0.18233	0.19642	0.33014	0.29511	0.22758	0.25078	0.14816	0.036345	0.020425	0.071197	0.19932	0.24498	0.34198	0.37765	0.23587	0.12384	0.13645	0.036842	1
0.45034	0.32506	0.42701	0.40682	0.34344	0.42467	0.35164	0.35668	0.31184	0.49365	0.4047	0.36073	0.33911	0.42338	0.47533	0.3725	0.34685	0.44837	0.35798	0.36	0.060658	0.12419	0.16504	0.26536	0.27926	0.38952	0.32241	0.16653	0.12131	0.05311	0.034336	0.091047	0.2232	0.25968	0.38726	0.35189	0.23728	0.17687	0.13987	0.039266	1
0.34447	0.45815	0.3787	0.49709	0.3984	0.37616	0.4266	0.35941	0.36257	0.30179	0.32989	0.28715	0.37905	0.49215	0.37443	0.32819	0.46783	0.38834	0.33735	0.49669	0.030121	0.088561	0.17455	0.20168	0.37758	0.38758	0.25645	0.22925	0.17091	0.02812	0.016716	0.091038	0.22936	0.29637	0.36022	0.32627	0.26554	0.18203	0.12531	0.050832	1
0.1589	0.1855	0.27645	0.21317	0.33888	0.39346	0.40871	0.37236	0.29357	0.31513	0.3406	0.31078	0.35535	0.35057	0.35262	0.38813	0.20549	0.2142	0.20107	0.21616	0.063883	0.086775	0.21769	0.2776	0.20203	0.23433	0.24112	0.12959	0.01876	0.0037254	0.012826	0.072751	0.15991	0.19873	0.26229	0.23486	0.27555	0.18551	0.065355	0.005044	1
0.21051	0.20099	0.28238	0.35855	0.35371	0.51368	0.28807	0.25558	0.26423	0.49123	0.36248	0.36698	0.3515	0.38673	0.40046	0.26073	0.2601	0.24328	0.27851	0.28701	0.038653	0.10925	0.21895	0.30687	0.23163	0.25466	0.24412	0.14461	0.054654	0.0040572	0.023706	0.095817	0.16327	0.22918	0.22808	0.34442	0.24352	0.15279	0.055626	0.070775	1
0.1816	0.25423	0.28021	0.27309	0.40015	0.39846	0.43832	0.2815	0.36295	0.32563	0.4574	0.32105	0.34065	0.36095	0.34085	0.3782	0.35628	0.21456	0.20734	0.2105	0.053164	0.13266	0.1597	0.33134	0.27294	0.2129	0.22432	0.1705	0.028545	0.0053089	0.024536	0.09108	0.17521	0.21915	0.29498	0.27012	0.26766	0.20407	0.050378	0.0050709	1
0.17693	0.28471	0.21259	0.3112	0.39797	0.39542	0.41162	0.27378	0.33622	0.30025	0.33729	0.34493	0.36307	0.35592	0.367	0.38697	0.23953	0.23898	0.2096	0.23195	0.035072	0.11205	0.17476	0.31335	0.24211	0.2172	0.23737	0.161	0.037033	0.0040825	0.021163	0.09222	0.15423	0.20785	0.28785	0.24069	0.29793	0.16067	0.050614	0.016581	1
0.20106	0.21244	0.26375	0.35916	0.34763	0.49289	0.31614	0.26347	0.26086	0.46079	0.3416	0.36644	0.36966	0.365	0.41958	0.26869	0.26678	0.23441	0.25832	0.28383	0.033275	0.10851	0.21396	0.30906	0.22886	0.2443	0.24144	0.14832	0.052832	0.0034374	0.017245	0.095242	0.16153	0.22977	0.22454	0.32892	0.25727	0.15253	0.050853	0.06187	1
0.12522	0.11766	0.16211	0.17523	0.14143	0.11617	0.15594	0.11302	0.11704	0.132	0.12026	0.15271	0.1181	0.13356	0.14898	0.13316	0.14478	0.11914	0.11317	0.16807	0.013547	0.036252	0.0681	0.098128	0.095149	0.12212	0.1034	0.0782	0.04335	0.016497	0.0099775	0.023942	0.078879	0.096617	0.14015	0.11898	0.094074	0.062794	0.028364	0.021158	1
0.10302	0.12037	0.12102	0.13203	0.17652	0.15994	0.14009	0.14198	0.13695	0.13485	0.14527	0.11093	0.15975	0.1408	0.11971	0.13846	0.11332	0.13569	0.14095	0.1593	0.01405	0.045885	0.073838	0.0716	0.12899	0.13084	0.10855	0.058947	0.039816	0.0093656	0.01176	0.031574	0.062191	0.088927	0.14271	0.11063	0.098052	0.067807	0.043597	0.025095	1
0.13566	0.12001	0.12933	0.17966	0.15996	0.13145	0.16067	0.12067	0.10835	0.12785	0.14154	0.14683	0.14513	0.12551	0.15019	0.13873	0.12712	0.1433	0.11372	0.13762	0.020492	0.039561	0.069177	0.10078	0.098192	0.12034	0.10457	0.078076	0.039464	0.018349	0.015677	0.029469	0.065443	0.10084	0.14392	0.13022	0.10002	0.061111	0.031998	0.0091984	1
0.10449	0.1194	0.12614	0.16387	0.16391	0.17769	0.11995	0.1633	0.12752	0.12939	0.10903	0.15083	0.14125	0.12403	0.13735	0.11306	0.1309	0.14743	0.16022	0.16355	0.0076418	0.042474	0.060852	0.076212	0.13871	0.13543	0.11574	0.065573	0.03706	0.011459	0.0074141	0.037189	0.057363	0.1181	0.10575	0.11965	0.093498	0.073514	0.055109	0.02287	1
0.10865	0.11983	0.12265	0.14139	0.18005	0.1638	0.12414	0.16461	0.12636	0.12707	0.15331	0.11145	0.14252	0.15015	0.12941	0.13749	0.12075	0.12629	0.15066	0.15412	0.013806	0.043519	0.076399	0.07473	0.13076	0.12977	0.10694	0.062445	0.039605	0.011163	0.01428	0.027871	0.065197	0.090861	0.14502	0.11115	0.099677	0.068938	0.040086	0.023188	1
0.064798	0.067852	0.1251	0.092183	0.11161	0.098475	0.079275	0.10242	0.16921	0.095334	0.082692	0.10016	0.090496	0.093864	0.1112	0.10438	0.1085	0.090633	0.084099	0.13239	0.0083919	0.037251	0.058252	0.064383	0.082313	0.087116	0.066772	0.064389	0.023825	0.0055127	0.0076871	0.015699	0.040432	0.056367	0.09713	0.099266	0.068133	0.055739	0.036973	0.020203	1
0.07939	0.11589	0.081758	0.10686	0.085227	0.077469	0.10926	0.13657	0.1086	0.19502	0.094608	0.11547	0.11774	0.10875	0.10428	0.12396	0.10934	0.12044	0.10995	0.10775	0.022628	0.041161	0.058382	0.090648	0.096455	0.083675	0.05959	0.053234	0.039275	0.0090415	0.0057236	0.023682	0.038529	0.057024	0.11525	0.12123	0.080614	0.052803	0.042666	0.019415	1
0.13519	0.095162	0.11756	0.093795	0.084871	0.12172	0.15599	0.12354	0.17664	0.11145	0.12506	0.11791	0.11701	0.11063	0.12556	0.11788	0.11109	0.11681	0.1296	0.14835	0.014585	0.041589	0.074493	0.089131	0.10073	0.089948	0.078515	0.054936	0.047695	0.021589	0.008647	0.026814	0.040146	0.10002	0.11477	0.11368	0.075379	0.080174	0.048537	0.0041268	1
0.065917	0.066463	0.088095	0.10876	0.090888	0.10444	0.082463	0.077824	0.12189	0.12655	0.077528	0.090862	0.094347	0.089957	0.09459	0.11011	0.10383	0.10511	0.084296	0.083828	0.010976	0.035066	0.05975	0.059428	0.07686	0.07246	0.061973	0.059654	0.024452	0.0044158	0.0062521	0.018579	0.036457	0.054269	0.076728	0.11584	0.075392	0.050393	0.023604	0.010728	1
0.073779	0.073883	0.10831	0.081516	0.13143	0.095778	0.076416	0.091295	0.15107	0.09369	0.10447	0.086464	0.085258	0.10074	0.090025	0.091044	0.10988	0.10614	0.10806	0.088858	0.011687	0.026028	0.054686	0.08716	0.075377	0.078602	0.058045	0.048855	0.03622	0.006875	0.0071957	0.020457	0.044961	0.061512	0.07093	0.10707	0.086579	0.039813	0.032704	0.012312	1
0.060181	0.16102	0.13077	0.059098	0.12511	0.35564	0.15199	0.070449	0.073253	0.16204	0.2589	0.13494	0.1436	0.15475	0.13859	0.1343	0.096693	0.092355	0.07319	0.0915	0.018954	0.039874	0.14615	0.0769	0.098136	0.10837	0.12181	0.029495	0.017066	0.0051238	0.030302	0.043397	0.060201	0.10746	0.1175	0.11926	0.095913	0.064853	0.019871	0.0048795	1
0.058164	0.15927	0.15218	0.063275	0.10372	0.3601	0.18322	0.071818	0.069546	0.14557	0.25999	0.13849	0.14132	0.15224	0.14261	0.13135	0.10118	0.099089	0.077504	0.087068	0.016026	0.038684	0.14633	0.07745	0.10091	0.11555	0.11838	0.030193	0.019531	0.0043256	0.028924	0.047814	0.060926	0.1067	0.11726	0.1206	0.098628	0.064578	0.019731	0.0028776	1
0.068466	0.17397	0.094546	0.050465	0.1677	0.31562	0.12797	0.089611	0.088381	0.20605	0.21268	0.13623	0.15932	0.15922	0.14244	0.13548	0.10316	0.093257	0.075517	0.14577	0.024526	0.046639	0.13474	0.069281	0.090009	0.12223	0.13023	0.030983	0.01934	0.0095461	0.025402	0.031389	0.05322	0.10948	0.12671	0.1297	0.091226	0.064949	0.031803	0.016639	1
0.074917	0.22446	0.1649	0.1265	0.17183	0.32194	0.16915	0.078	0.067967	0.19396	0.18985	0.22183	0.25852	0.13856	0.14325	0.15338	0.14377	0.13122	0.097288	0.097323	0.017199	0.032887	0.068559	0.21777	0.13404	0.11404	0.10125	0.074804	0.020581	0.0062356	0.01386	0.091489	0.08858	0.11134	0.12539	0.12817	0.10748	0.086915	0.02636	0.0074565	1
0.13889	0.17204	0.085234	0.1075	0.30716	0.23398	0.086091	0.070274	0.094456	0.30262	0.26698	0.2314	0.14265	0.16655	0.16549	0.14666	0.15387	0.116	0.11504	0.089489	0.030144	0.050025	0.093813	0.19675	0.11047	0.099766	0.114	0.069901	0.02072	0.0094861	0.033708	0.06177	0.084353	0.11194	0.12331	0.14149	0.11751	0.069082	0.034819	0.015229	1
0.12174	0.10892	0.10759	0.25069	0.16829	0.10284	0.079788	0.083843	0.20291	0.25683	0.11209	0.14226	0.13619	0.16106	0.25193	0.19251	0.12213	0.14104	0.12527	0.12533	0.013603	0.075398	0.047854	0.12541	0.17295	0.085815	0.10116	0.073533	0.038598	0.013912	0.0035519	0.023428	0.069416	0.11131	0.16418	0.14195	0.091931	0.057708	0.046509	0.038425	1
0.10542	0.13966	0.12174	0.095966	0.24002	0.17681	0.1261	0.081412	0.07384	0.18416	0.1356	0.11613	0.12667	0.24996	0.24511	0.10937	0.096413	0.095907	0.075235	0.1007	0.030294	0.036993	0.068421	0.13065	0.083652	0.11137	0.12903	0.050295	0.030087	0.0041203	0.012954	0.023511	0.08224	0.10366	0.15349	0.13328	0.080078	0.055781	0.022873	0.0080276	1
0.056967	0.096817	0.17267	0.11023	0.098762	0.21236	0.16063	0.12509	0.096776	0.072107	0.083117	0.10864	0.25418	0.22121	0.086485	0.084071	0.091314	0.077467	0.091027	0.094367	0.0050658	0.034149	0.089381	0.078907	0.099349	0.15243	0.071539	0.040942	0.022121	0.0021233	0.0077264	0.032126	0.056672	0.11158	0.13805	0.098125	0.065615	0.041046	0.028049	0.012625	1
0.12771	0.15088	0.077946	0.18495	0.1924	0.14205	0.094524	0.075834	0.1565	0.28507	0.1436	0.13595	0.17734	0.24657	0.15402	0.12553	0.13356	0.11073	0.12625	0.1327	0.035801	0.051847	0.069528	0.14792	0.11869	0.1065	0.12241	0.050793	0.034565	0.014807	0.0066019	0.024085	0.08606	0.12909	0.14356	0.14137	0.066278	0.073026	0.049325	0.031497	1
0.11797	0.14096	0.10152	0.1236	0.25263	0.15754	0.097139	0.079886	0.089683	0.22278	0.12509	0.13634	0.1187	0.16375	0.27964	0.20244	0.10257	0.1023	0.089044	0.08597	0.028308	0.04816	0.053315	0.13488	0.11201	0.08529	0.12824	0.065178	0.034469	0.0047348	0.012464	0.024066	0.074262	0.093635	0.14793	0.15205	0.097993	0.057029	0.028287	0.006545	1
0.15729	0.13132	0.1699	0.11618	0.14586	0.29359	0.17862	0.15343	0.15578	0.22291	0.17648	0.17019	0.23715	0.18204	0.091059	0.10285	0.11332	0.14398	0.35993	0.12735	0.033405	0.07496	0.07998	0.071115	0.14931	0.20006	0.093839	0.087144	0.066816	0.0012607	0.022537	0.043873	0.057697	0.12281	0.1552	0.14087	0.1298	0.08286	0.080049	0.021336	1
0.23074	0.11194	0.18013	0.23841	0.11742	0.13407	0.12157	0.19617	0.12847	0.1343	0.15895	0.1658	0.096018	0.094939	0.096398	0.099665	0.3097	0.30555	0.15964	0.10984	0.0013391	0.0201	0.053496	0.12388	0.16327	0.16114	0.1191	0.050121	0.063042	0.04017	0.014789	0.064343	0.076335	0.090683	0.15551	0.1153	0.10363	0.10346	0.053714	0.019649	1
0.087185	0.11596	0.25355	0.13785	0.15331	0.21224	0.11863	0.14886	0.12281	0.1791	0.20365	0.10105	0.094585	0.11402	0.13548	0.35792	0.19059	0.10841	0.10547	0.13586	0.026132	0.035809	0.051682	0.13482	0.17178	0.089359	0.1277	0.080336	0.047051	0.0011845	0.024435	0.037942	0.059676	0.090097	0.1391	0.15085	0.12404	0.095906	0.041721	0.0022774	1
0.13258	0.23782	0.10989	0.19087	0.23091	0.11472	0.13791	0.12413	0.20864	0.12448	0.17761	0.17956	0.10123	0.1011	0.098479	0.12516	0.33124	0.25916	0.11782	0.11226	0.0053783	0.037224	0.079664	0.10713	0.16114	0.16669	0.077328	0.079663	0.076797	0.017978	0.01418	0.044233	0.095348	0.089303	0.14541	0.15022	0.10392	0.10749	0.053457	0.0036776	1
0.14198	0.1528	0.11824	0.121	0.28878	0.18697	0.15066	0.16177	0.2052	0.20899	0.18524	0.15751	0.19543	0.1755	0.1045	0.098403	0.11101	0.13838	0.36263	0.19504	0.023262	0.070498	0.086325	0.097327	0.11846	0.18038	0.13977	0.040328	0.094249	0.0091796	0.019556	0.022028	0.051421	0.15791	0.14921	0.15363	0.10706	0.097347	0.086426	0.022552	1
0.48326	0.45713	0.18746	0.19014	0.3232	0.13714	0.086784	0.041052	0.10041	0.29577	0.21943	0.21471	0.24462	0.19625	0.15908	0.21068	0.25074	0.28753	0.23511	0.28581	0.0036039	0.043901	0.07862	0.11837	0.16935	0.17272	0.23064	0.16144	0.13019	0.044741	0.054766	0.12388	0.1232	0.14825	0.2344	0.18524	0.10881	0.055012	0.065101	0.054207	1
0.23907	0.52648	0.37912	0.18203	0.20091	0.32329	0.13936	0.098502	0.046555	0.13558	0.23841	0.28306	0.21305	0.18611	0.16562	0.22159	0.24542	0.23405	0.18925	0.28068	0.0045771	0.033377	0.079805	0.080171	0.15114	0.24579	0.27298	0.15286	0.085402	0.016822	0.050782	0.14364	0.12931	0.13883	0.21718	0.20884	0.11395	0.04323	0.040662	0.03668	1
0.31137	0.5409	0.33415	0.15712	0.22776	0.30559	0.1097	0.068945	0.040787	0.16874	0.25216	0.2467	0.25309	0.18988	0.15089	0.20969	0.22831	0.26347	0.21402	0.25154	0.0042075	0.034175	0.081202	0.095002	0.17096	0.19756	0.28024	0.14204	0.1129	0.024666	0.049752	0.14529	0.14564	0.14416	0.21001	0.21153	0.11856	0.036595	0.032523	0.042172	1
0.3678	0.50795	0.28341	0.1699	0.2675	0.25557	0.11202	0.06994	0.055381	0.22259	0.22338	0.25977	0.22552	0.18223	0.15352	0.22214	0.25236	0.27733	0.21488	0.29564	0.0062583	0.038004	0.072715	0.096082	0.1691	0.19783	0.28382	0.14431	0.11625	0.028696	0.054248	0.13627	0.12549	0.14398	0.23053	0.19444	0.10539	0.044276	0.061589	0.048267	1
0.40261	0.4381	0.20962	0.20371	0.2935	0.20119	0.14315	0.10716	0.12353	0.28884	0.26509	0.19182	0.16321	0.18912	0.23933	0.28791	0.24683	0.24729	0.30816	0.28186	0.027381	0.044897	0.070035	0.097401	0.14456	0.30117	0.22639	0.18601	0.081697	0.037392	0.058806	0.09459	0.11614	0.2091	0.22312	0.17548	0.085774	0.1021	0.12206	0.033063	1
0.34952	0.3851	0.32865	0.40486	0.3366	0.25526	0.31347	0.43616	0.34352	0.46116	0.32352	0.34022	0.39581	0.31566	0.35576	0.33148	0.35182	0.40042	0.42102	0.39497	0.038043	0.12158	0.17548	0.28056	0.31181	0.22911	0.2995	0.17325	0.1384	0.055488	0.0073243	0.11409	0.12758	0.29374	0.34186	0.29521	0.24916	0.20589	0.14424	0.038916	1
0.36873	0.43012	0.27892	0.25539	0.43288	0.30753	0.3885	0.41171	0.30744	0.33045	0.34518	0.36068	0.33859	0.4069	0.31009	0.37563	0.37212	0.3521	0.31195	0.33712	0.028871	0.08946	0.19567	0.25577	0.35009	0.2896	0.19258	0.16245	0.12967	0.047424	0.031758	0.10674	0.17	0.26884	0.2794	0.31202	0.2573	0.23247	0.085782	0.020541	1
0.34628	0.46043	0.30847	0.23979	0.42164	0.36755	0.37234	0.41531	0.31182	0.30445	0.39048	0.34885	0.34047	0.40878	0.31525	0.37141	0.3692	0.35412	0.32904	0.32902	0.029459	0.097368	0.18671	0.2544	0.35286	0.30474	0.19847	0.16726	0.11858	0.046825	0.040683	0.11994	0.16114	0.28528	0.27961	0.3048	0.23801	0.22014	0.10718	0.012495	1
0.39737	0.36677	0.2709	0.30053	0.44479	0.32114	0.4515	0.30759	0.29177	0.39253	0.35645	0.33997	0.40738	0.30533	0.36891	0.38416	0.36537	0.31571	0.33045	0.36744	0.039701	0.087407	0.19957	0.27826	0.31723	0.29136	0.16773	0.20862	0.14825	0.043732	0.025552	0.088575	0.2285	0.21253	0.29766	0.3194	0.29929	0.18843	0.056447	0.046883	1
0.38945	0.33874	0.43544	0.35476	0.21994	0.3171	0.40929	0.38197	0.46776	0.33581	0.44831	0.34681	0.38535	0.38387	0.3299	0.34959	0.38866	0.34722	0.31407	0.36005	0.051926	0.12223	0.16789	0.27823	0.35143	0.31447	0.17635	0.20521	0.11432	0.051211	0.031175	0.13294	0.16849	0.27306	0.34302	0.29519	0.25016	0.17355	0.14584	0.020483	1
0.40978	0.39612	0.32835	0.29512	0.33588	0.38675	0.25882	0.38512	0.27279	0.4082	0.38769	0.37898	0.37769	0.3988	0.31756	0.32303	0.34811	0.35501	0.35218	0.27614	0.024268	0.11087	0.20535	0.23194	0.27273	0.40904	0.20394	0.10908	0.17476	0.017805	0.052037	0.10953	0.18855	0.28583	0.29231	0.28725	0.22195	0.17614	0.089984	0.050185	1
0.33104	0.45065	0.32053	0.35299	0.29361	0.43569	0.31453	0.30933	0.38025	0.26558	0.35707	0.40422	0.35168	0.36572	0.32848	0.29062	0.35606	0.3599	0.32981	0.24737	0.019557	0.097878	0.19838	0.21775	0.26879	0.43065	0.15754	0.12802	0.17504	0.0051552	0.044927	0.11342	0.15844	0.28465	0.32288	0.27134	0.21114	0.17898	0.087814	0.02557	1
0.2573	0.36173	0.29844	0.30318	0.27192	0.39839	0.18877	0.28293	0.32081	0.2879	0.36567	0.35651	0.29584	0.32782	0.35514	0.34642	0.29627	0.29643	0.20252	0.13933	0.035033	0.10028	0.13713	0.21375	0.39123	0.1577	0.20923	0.20356	0.033673	0.0062433	0.039846	0.10135	0.194	0.21881	0.2571	0.24555	0.21028	0.12568	0.077476	0.01623	1
0.41009	0.30118	0.4317	0.3714	0.33533	0.29257	0.36299	0.35123	0.27709	0.38377	0.43637	0.42004	0.38376	0.35753	0.30816	0.33184	0.3801	0.3554	0.32872	0.21823	0.041308	0.132	0.15098	0.21325	0.39882	0.31562	0.14922	0.28368	0.06178	0.018803	0.053814	0.14305	0.1732	0.27303	0.33373	0.28069	0.22877	0.1366	0.09766	0.038119	1
0.32219	0.4388	0.32114	0.36286	0.29391	0.43425	0.26311	0.30372	0.38914	0.28427	0.41113	0.35848	0.36015	0.34224	0.29301	0.34791	0.36232	0.33755	0.26552	0.28723	0.021646	0.12877	0.17429	0.2141	0.30777	0.39114	0.11272	0.19471	0.12503	0.010399	0.052482	0.10124	0.18152	0.28627	0.28544	0.27121	0.22155	0.17098	0.068691	0.042443	1
0.34714	0.32672	0.2607	0.3691	0.47239	0.31789	0.21028	0.23821	0.36383	0.3407	0.42242	0.36306	0.28157	0.31182	0.34458	0.29009	0.23764	0.25182	0.36707	0.3605	0.037159	0.14216	0.10884	0.20617	0.2722	0.33856	0.24278	0.11948	0.10982	0.039343	0.039141	0.12455	0.18487	0.23214	0.23471	0.23917	0.25236	0.1674	0.12532	0.016946	1
0.39934	0.35573	0.38228	0.32337	0.27684	0.35263	0.48378	0.36608	0.19908	0.23783	0.42407	0.40914	0.35983	0.28013	0.34429	0.34146	0.25071	0.29774	0.26915	0.37538	0.045037	0.10289	0.12854	0.23158	0.28779	0.35942	0.20151	0.13547	0.17663	0.010722	0.038522	0.11683	0.20764	0.28999	0.32939	0.26393	0.15628	0.15454	0.0931	0.031676	1
0.43242	0.34368	0.3963	0.35195	0.28289	0.296	0.43306	0.45573	0.21085	0.22388	0.42657	0.39075	0.37389	0.30744	0.37313	0.36742	0.26848	0.30562	0.2585	0.36118	0.044852	0.099744	0.14972	0.23353	0.30393	0.33862	0.20096	0.17371	0.16333	0.004929	0.027916	0.11648	0.20836	0.30306	0.34558	0.28597	0.15736	0.14046	0.10724	0.028802	1
0.38206	0.32213	0.32194	0.24861	0.29692	0.40748	0.37588	0.18483	0.21497	0.34529	0.32545	0.25272	0.34065	0.32093	0.2424	0.23991	0.32757	0.41051	0.33191	0.26854	0.027792	0.036215	0.12632	0.219	0.36834	0.28983	0.17755	0.17468	0.08948	0.037871	0.035017	0.11913	0.16978	0.24542	0.20872	0.22136	0.24347	0.15154	0.10235	0.051994	1
0.39081	0.32966	0.39814	0.32086	0.27773	0.28574	0.43057	0.41447	0.20906	0.2093	0.38994	0.35296	0.30669	0.38432	0.35779	0.23788	0.29587	0.28198	0.36856	0.28472	0.023433	0.042164	0.17032	0.22567	0.3736	0.29056	0.21329	0.24223	0.072618	0.0072423	0.042494	0.13799	0.2111	0.26296	0.28093	0.20813	0.1674	0.20047	0.088931	0.048093	1
0.42776	0.23702	0.30983	0.25064	0.31209	0.39075	0.37176	0.25995	0.35421	0.33575	0.2987	0.26222	0.24313	0.3736	0.39419	0.30447	0.30309	0.3776	0.40894	0.27544	0.033843	0.078989	0.16828	0.25797	0.24824	0.24428	0.23584	0.17127	0.13479	0.042526	0.026799	0.089395	0.13273	0.20463	0.32618	0.26308	0.23504	0.24744	0.081824	0.010139	1
0.38539	0.32797	0.27818	0.2929	0.25268	0.32922	0.39278	0.29408	0.30359	0.36823	0.3222	0.32266	0.23357	0.26208	0.29576	0.41566	0.36092	0.27069	0.3225	0.40486	0.013328	0.039616	0.16758	0.27977	0.31003	0.28664	0.22025	0.13868	0.08893	0.063703	0.031959	0.11079	0.18069	0.18339	0.22761	0.30876	0.17817	0.16409	0.16633	0.058132	1
0.31791	0.34809	0.41163	0.24386	0.33639	0.2405	0.29765	0.37683	0.32339	0.26666	0.38888	0.37237	0.24647	0.30041	0.27675	0.36976	0.28822	0.19954	0.28803	0.42554	0.0059976	0.084896	0.19031	0.22898	0.26893	0.30872	0.23152	0.10651	0.099385	0.053387	0.054168	0.11395	0.18844	0.18136	0.22696	0.28666	0.2483	0.133	0.090903	0.061076	1
0.32374	0.33621	0.35509	0.26595	0.29201	0.22312	0.30861	0.38937	0.28946	0.27919	0.32683	0.37669	0.30343	0.28858	0.26585	0.32559	0.35893	0.26485	0.22912	0.3652	0.0047026	0.070529	0.17486	0.26739	0.26456	0.29143	0.25847	0.10197	0.075221	0.044691	0.04741	0.1151	0.18774	0.20911	0.21102	0.26276	0.24593	0.12107	0.083234	0.068268	1
0.29693	0.42157	0.27726	0.3018	0.26367	0.25038	0.36192	0.36325	0.25945	0.27597	0.29551	0.3583	0.31466	0.27266	0.2612	0.31565	0.3678	0.28224	0.23438	0.36079	0.0043785	0.049375	0.16345	0.26954	0.27324	0.28374	0.24271	0.13135	0.070341	0.045198	0.036841	0.11739	0.1864	0.21065	0.20999	0.25779	0.22953	0.11921	0.08725	0.069809	1
0.35558	0.45294	0.3256	0.35042	0.38322	0.47262	0.37205	0.33306	0.39769	0.25694	0.43667	0.3829	0.35862	0.321	0.3611	0.41002	0.33267	0.33668	0.32165	0.39519	0.038468	0.088034	0.1959	0.29029	0.27181	0.37045	0.22184	0.16565	0.13848	0.050123	0.039816	0.095783	0.20147	0.27622	0.39583	0.28639	0.20009	0.19833	0.12177	0.010999	1
0.30945	0.37136	0.42969	0.34216	0.34687	0.35601	0.21187	0.14826	0.23172	0.32222	0.33186	0.28244	0.30159	0.37852	0.35929	0.31048	0.24203	0.31353	0.28331	0.25257	0.03074	0.047369	0.12626	0.25813	0.26822	0.26992	0.23632	0.14148	0.10151	0.041469	0.030636	0.13048	0.19907	0.18672	0.22494	0.34419	0.23528	0.083299	0.038657	0.050799	1
0.37717	0.32729	0.33452	0.419	0.43991	0.30071	0.38341	0.3319	0.17537	0.16373	0.36005	0.32611	0.30684	0.28981	0.35558	0.41332	0.33435	0.25024	0.31373	0.33129	0.010217	0.057528	0.14029	0.28951	0.26173	0.28907	0.26515	0.1541	0.10106	0.06607	0.021244	0.12702	0.19878	0.29244	0.27716	0.23656	0.22287	0.21078	0.0333	0.0096721	1
0.33309	0.35132	0.46794	0.39731	0.32767	0.39662	0.30617	0.18369	0.23036	0.32592	0.45118	0.36662	0.31629	0.28086	0.31694	0.39295	0.3488	0.2982	0.23614	0.30618	0.048599	0.086032	0.12047	0.2138	0.35779	0.27209	0.25911	0.19089	0.081084	0.03398	0.05245	0.12031	0.20794	0.29459	0.23619	0.22378	0.27839	0.17554	0.050832	0.021475	1
0.39522	0.42267	0.32127	0.34187	0.40043	0.45645	0.3428	0.35718	0.39217	0.23967	0.43811	0.3955	0.36556	0.31999	0.34696	0.41548	0.34266	0.34541	0.29334	0.3801	0.040325	0.077425	0.17886	0.31534	0.25814	0.37293	0.23783	0.16231	0.12308	0.046581	0.046018	0.10035	0.20702	0.26986	0.39053	0.28353	0.18998	0.19591	0.12478	0.0089865	1
0.38319	0.40482	0.44365	0.35613	0.37322	0.35728	0.42997	0.28041	0.26061	0.30093	0.41641	0.32266	0.26649	0.3483	0.4211	0.34652	0.28827	0.35036	0.38585	0.44248	0.032829	0.07336	0.14591	0.24048	0.31466	0.30595	0.31431	0.194	0.12802	0.045625	0.041922	0.12135	0.20026	0.26023	0.32115	0.24633	0.31341	0.15238	0.084948	0.058558	1
0.38086	0.42219	0.44945	0.32316	0.36653	0.35507	0.40782	0.2717	0.26047	0.28961	0.36737	0.46922	0.37289	0.29654	0.27779	0.37388	0.42711	0.31041	0.31499	0.34713	0.045412	0.10499	0.14786	0.22199	0.32334	0.31002	0.23153	0.23678	0.10781	0.046696	0.033409	0.13271	0.20106	0.26994	0.32656	0.32675	0.17438	0.23537	0.057581	0.014785	1
0.26489	0.39279	0.41484	0.45092	0.31315	0.38076	0.35424	0.41371	0.30166	0.26552	0.36595	0.40706	0.44473	0.31379	0.2593	0.33799	0.37513	0.37698	0.3023	0.35593	0.044811	0.10679	0.14834	0.251	0.32328	0.31476	0.23986	0.22387	0.10383	0.026947	0.023764	0.11486	0.1831	0.27868	0.32526	0.35168	0.20449	0.15789	0.13181	0.013199	1
0.44094	0.3548	0.35671	0.33902	0.41174	0.29919	0.25824	0.25145	0.41759	0.31681	0.35105	0.27292	0.31768	0.41027	0.37571	0.22524	0.33581	0.37359	0.44036	0.36571	0.030815	0.10292	0.14441	0.21703	0.29833	0.30808	0.23154	0.23506	0.12103	0.047614	0.047117	0.11365	0.16799	0.22407	0.2576	0.40978	0.19938	0.13305	0.16021	0.024231	1
0.30305	0.39673	0.41704	0.45791	0.35089	0.3689	0.33619	0.41055	0.2883	0.25118	0.44704	0.36515	0.27938	0.31093	0.35647	0.38416	0.33621	0.3304	0.36347	0.42745	0.037744	0.074994	0.16031	0.27338	0.31452	0.28019	0.31596	0.17509	0.10988	0.060935	0.037745	0.1111	0.19094	0.26028	0.32144	0.33011	0.19694	0.24295	0.072671	0.029943	1
0.14365	0.17127	0.21932	0.17977	0.16857	0.21494	0.16356	0.15781	0.16888	0.14996	0.18032	0.2272	0.25975	0.18892	0.12653	0.13725	0.14381	0.14359	0.15219	0.17213	0.023337	0.10635	0.085783	0.089258	0.12263	0.15996	0.12666	0.063717	0.064234	0.027837	0.0085841	0.027968	0.10043	0.15003	0.21023	0.17645	0.085835	0.047238	0.046901	0.0088582	1
0.11113	0.1261	0.16325	0.24437	0.19718	0.17249	0.17899	0.11708	0.07928	0.10501	0.19763	0.17527	0.14566	0.14059	0.14903	0.13181	0.13919	0.21088	0.12589	0.077767	0.016617	0.030591	0.064346	0.13426	0.15368	0.096014	0.11056	0.089709	0.036436	0.009841	0.0048459	0.057711	0.087396	0.10575	0.18559	0.115	0.08625	0.075251	0.02553	0.0034778	1
0.14375	0.13827	0.18414	0.20311	0.17716	0.16741	0.20487	0.14772	0.17107	0.19791	0.17914	0.21399	0.2214	0.21862	0.15588	0.11706	0.16048	0.12398	0.152	0.17834	0.040127	0.087407	0.088059	0.094569	0.12587	0.17223	0.12299	0.061389	0.050065	0.028122	0.022671	0.021445	0.071473	0.11875	0.19751	0.2152	0.12037	0.037588	0.040929	0.01942	1
0.18531	0.24801	0.19291	0.18559	0.19621	0.11143	0.10997	0.13195	0.15565	0.15102	0.23914	0.24124	0.14294	0.13081	0.16655	0.11974	0.17887	0.14908	0.14161	0.14807	0.016752	0.080595	0.065285	0.097252	0.13724	0.16264	0.1077	0.074015	0.086137	0.012473	0.010667	0.082376	0.10976	0.13987	0.1729	0.11224	0.092861	0.061686	0.034341	0.020666	1
0.14287	0.19396	0.24451	0.19447	0.1847	0.19116	0.10926	0.1168	0.13884	0.1533	0.23935	0.25853	0.15588	0.11901	0.16237	0.11857	0.16426	0.16451	0.14841	0.1253	0.029804	0.073218	0.060953	0.09238	0.15891	0.16638	0.081507	0.091561	0.075458	0.0037857	0.013269	0.064739	0.10533	0.14349	0.1852	0.13026	0.086318	0.069915	0.024921	0.014545	1
0.15032	0.15008	0.12916	0.12885	0.15582	0.18911	0.11486	0.10292	0.19708	0.13352	0.16009	0.16286	0.16921	0.1617	0.13744	0.13019	0.1273	0.13206	0.12769	0.12694	0.018581	0.053848	0.083336	0.085472	0.10012	0.14836	0.11109	0.068868	0.040232	0.0062425	0.023881	0.044075	0.062811	0.11385	0.1247	0.11976	0.10628	0.060971	0.048866	0.0069166	1
0.13803	0.15219	0.12705	0.13638	0.14332	0.17531	0.14281	0.07701	0.18135	0.15712	0.16401	0.17169	0.15614	0.15365	0.13131	0.12822	0.13114	0.14526	0.11987	0.12112	0.022139	0.055507	0.074611	0.079997	0.11486	0.15696	0.092436	0.078335	0.036189	0.0050501	0.022697	0.045443	0.063463	0.11956	0.11754	0.12532	0.099477	0.064117	0.044417	0.011842	1
0.14104	0.15583	0.12502	0.13385	0.14908	0.18069	0.14225	0.075663	0.1854	0.16093	0.16408	0.17119	0.16081	0.15721	0.12973	0.12698	0.13088	0.14745	0.12428	0.13122	0.022287	0.053151	0.080135	0.080714	0.11064	0.1561	0.095598	0.080303	0.039255	0.0059297	0.022327	0.047462	0.060828	0.11749	0.12142	0.12344	0.10381	0.06628	0.048704	0.0094595	1
0.15574	0.1208	0.12092	0.15348	0.18062	0.099436	0.084629	0.20939	0.14403	0.10694	0.12316	0.14753	0.15649	0.1569	0.14331	0.13593	0.12946	0.12788	0.1314	0.12196	0.0039587	0.052219	0.07404	0.10911	0.10005	0.10923	0.11769	0.059523	0.050177	0.011283	0.016835	0.031846	0.069336	0.11112	0.12521	0.12098	0.097263	0.062228	0.044164	0.0089966	1
0.12887	0.15666	0.12551	0.13606	0.13798	0.15683	0.17454	0.067238	0.1461	0.17776	0.15998	0.17046	0.15704	0.15042	0.13631	0.13231	0.12847	0.1423	0.11894	0.11459	0.024141	0.055094	0.073568	0.074335	0.12909	0.15385	0.089175	0.073961	0.03362	0.00392	0.018185	0.052282	0.057112	0.12399	0.11169	0.11753	0.10459	0.06698	0.041941	0.010933	1
0.077301	0.14219	0.1496	0.12626	0.16577	0.11803	0.0692	0.075126	0.10658	0.17715	0.12974	0.14074	0.11942	0.11002	0.10262	0.076286	0.10866	0.12588	0.12854	0.1534	0.016624	0.047292	0.055218	0.063475	0.094624	0.1088	0.11385	0.051553	0.030615	0.017163	0.01462	0.034202	0.057304	0.09477	0.087089	0.11789	0.06469	0.075642	0.047038	0.013383	1
0.042885	0.068824	0.14345	0.12816	0.11998	0.16285	0.11013	0.058291	0.069413	0.11983	0.09867	0.11648	0.13305	0.10505	0.091161	0.087524	0.053031	0.087048	0.11628	0.12013	0.015018	0.046997	0.035591	0.04972	0.092149	0.097191	0.099685	0.048735	0.01847	0.0016005	0.0071233	0.028816	0.040357	0.072959	0.11103	0.089168	0.078477	0.029465	0.035487	0.017706	1
0.03738	0.053124	0.11821	0.14399	0.10869	0.15714	0.13579	0.072778	0.062069	0.084347	0.092994	0.10996	0.11871	0.10041	0.088344	0.088175	0.052523	0.07438	0.11176	0.12038	0.012332	0.038929	0.033024	0.049942	0.089188	0.097142	0.09697	0.045721	0.013389	0.0018168	0.0067211	0.025663	0.039434	0.061336	0.10943	0.088951	0.073042	0.032901	0.021386	0.022774	1
0.045704	0.078295	0.14324	0.11183	0.13522	0.15484	0.09211	0.060736	0.072082	0.15303	0.097222	0.11868	0.13613	0.11251	0.098767	0.093018	0.058208	0.093151	0.1165	0.12083	0.014975	0.052298	0.043544	0.052712	0.09018	0.093524	0.10349	0.050238	0.021085	0.001756	0.0063731	0.031021	0.040072	0.078658	0.10814	0.089427	0.081412	0.032979	0.045462	0.012046	1
0.076448	0.14468	0.13868	0.12335	0.16524	0.11559	0.063052	0.068746	0.11401	0.17345	0.11399	0.14234	0.1259	0.10904	0.11363	0.082679	0.097731	0.12364	0.12189	0.13791	0.012886	0.050348	0.056804	0.063681	0.093624	0.097401	0.11215	0.05805	0.030301	0.011629	0.011851	0.032715	0.054574	0.097668	0.0887	0.11078	0.064147	0.07141	0.047615	0.01103	1
0.12573	0.10921	0.072108	0.082594	0.1652	0.1575	0.11568	0.11371	0.14689	0.18132	0.11554	0.10325	0.094448	0.14571	0.14785	0.14053	0.12835	0.10976	0.13871	0.14358	0.0062648	0.046301	0.073991	0.098721	0.080177	0.11217	0.12009	0.053144	0.030913	0.011013	0.01445	0.021562	0.048554	0.09002	0.11778	0.09852	0.089992	0.073091	0.058974	0.017984	1
0.1129	0.083127	0.074639	0.11873	0.18683	0.13828	0.10774	0.11808	0.20479	0.17596	0.10741	0.1097	0.12347	0.16368	0.12649	0.14574	0.1147	0.1217	0.15588	0.15173	0.013743	0.05186	0.071794	0.10509	0.088861	0.11255	0.12437	0.055185	0.026012	0.0098188	0.008818	0.019487	0.048435	0.090274	0.11322	0.10889	0.09869	0.083442	0.06332	0.023619	1
0.078795	0.095538	0.12596	0.18825	0.13311	0.10162	0.11116	0.19801	0.17373	0.15206	0.14986	0.11431	0.11205	0.12285	0.1757	0.13949	0.15045	0.12418	0.12014	0.14245	0.016018	0.03673	0.08251	0.10987	0.13933	0.095129	0.069552	0.097647	0.02755	0.0036943	0.012721	0.024273	0.05853	0.089207	0.11213	0.11764	0.11008	0.082133	0.061501	0.010916	1
0.11173	0.082281	0.079905	0.12554	0.1798	0.13403	0.10953	0.11839	0.20744	0.18883	0.11259	0.11642	0.12836	0.16625	0.12856	0.14105	0.11252	0.12894	0.15865	0.1544	0.017618	0.054249	0.07553	0.10422	0.087406	0.11737	0.12475	0.055572	0.026937	0.0097839	0.008583	0.019673	0.052454	0.090441	0.11121	0.11979	0.09805	0.087719	0.061074	0.024002	1
0.11283	0.075031	0.078941	0.13568	0.17396	0.1273	0.10483	0.11828	0.2042	0.19067	0.12154	0.11389	0.11325	0.14804	0.15111	0.14493	0.12786	0.11713	0.14773	0.15962	0.016639	0.046603	0.079321	0.10853	0.10258	0.086341	0.12889	0.064981	0.019635	0.012751	0.0089675	0.020767	0.050109	0.090746	0.11357	0.11047	0.10194	0.081073	0.065516	0.023484	1
0.17459	0.16205	0.15767	0.11597	0.083439	0.1583	0.17927	0.17089	0.13053	0.1412	0.12667	0.15811	0.14342	0.1576	0.13549	0.11013	0.15535	0.1666	0.15289	0.17684	0.01753	0.034354	0.077721	0.087534	0.14215	0.13287	0.091775	0.070097	0.038441	0.044682	0.0122	0.050585	0.065271	0.091123	0.12377	0.14402	0.10758	0.085556	0.05184	0.0060211	1
0.20068	0.17441	0.1648	0.13236	0.092321	0.11994	0.19333	0.19993	0.12426	0.14668	0.15359	0.14546	0.16341	0.13749	0.11415	0.14424	0.17918	0.15881	0.18168	0.16849	0.01493	0.041877	0.072258	0.10975	0.13889	0.13851	0.091796	0.057126	0.075339	0.034025	0.022797	0.048947	0.068501	0.087698	0.13665	0.15563	0.10376	0.09102	0.047936	0.0093904	1
0.19047	0.15308	0.15749	0.13529	0.11051	0.10938	0.18192	0.21099	0.1229	0.13719	0.13787	0.16546	0.13937	0.11352	0.14435	0.17933	0.16014	0.17815	0.17407	0.12379	0.015576	0.043483	0.069117	0.11685	0.12441	0.1236	0.090476	0.072121	0.083426	0.016285	0.01923	0.037084	0.072407	0.092205	0.14059	0.14922	0.1035	0.095642	0.039844	0.0075797	1
0.20669	0.14597	0.16853	0.1405	0.10089	0.11077	0.18445	0.19692	0.12957	0.14794	0.13687	0.15793	0.1492	0.16344	0.12914	0.10697	0.16508	0.17476	0.1607	0.19521	0.016043	0.032646	0.074802	0.10217	0.14175	0.14359	0.09168	0.061145	0.064232	0.043056	0.015373	0.059701	0.060051	0.097883	0.12631	0.14936	0.11611	0.077128	0.062924	0.0091457	1
0.14338	0.15911	0.14156	0.10973	0.095617	0.17847	0.19243	0.15677	0.14285	0.1175	0.13614	0.1618	0.13455	0.15667	0.13428	0.10735	0.1572	0.15616	0.13322	0.15855	0.018809	0.037171	0.074828	0.084347	0.14451	0.12907	0.090517	0.071028	0.033741	0.033167	0.014106	0.047769	0.070369	0.07866	0.11434	0.15667	0.099383	0.087662	0.03936	0.0056998	1
0.14076	0.10037	0.1192	0.12235	0.11447	0.1875	0.16592	0.097587	0.085946	0.084815	0.10985	0.11933	0.14385	0.12717	0.15149	0.1186	0.11896	0.12241	0.11748	0.085062	0.0086013	0.039124	0.063533	0.058299	0.1026	0.13823	0.09737	0.047188	0.041196	0.0092137	0.010039	0.025284	0.071031	0.10941	0.11374	0.11231	0.074161	0.053892	0.030383	0.0063377	1
0.10198	0.10378	0.14569	0.10717	0.11698	0.11983	0.11097	0.18136	0.15521	0.096016	0.11442	0.11785	0.13367	0.14992	0.142	0.12858	0.12668	0.12522	0.10725	0.089523	0.01499	0.047767	0.040826	0.099558	0.13598	0.11382	0.067684	0.059252	0.032522	0.0067002	0.0068771	0.037769	0.042462	0.098052	0.126	0.11075	0.08424	0.058905	0.040557	0.011627	1
0.13348	0.11321	0.13027	0.11998	0.11319	0.1883	0.17793	0.078552	0.074994	0.068568	0.14861	0.11415	0.15235	0.13097	0.11455	0.12227	0.11686	0.092978	0.086445	0.10483	0.014596	0.029182	0.045703	0.074232	0.1357	0.11687	0.075213	0.064314	0.023013	0.01315	0.014464	0.04535	0.076614	0.092375	0.10887	0.094988	0.071107	0.065682	0.018881	0.0034316	1
0.098941	0.099406	0.13995	0.10084	0.11629	0.12288	0.10622	0.15949	0.18534	0.10506	0.10653	0.11904	0.1369	0.14715	0.14299	0.13231	0.1286	0.12259	0.10538	0.088244	0.011705	0.048579	0.039909	0.10862	0.1312	0.1108	0.067195	0.059511	0.029399	0.0058516	0.0083785	0.035413	0.044327	0.095211	0.12149	0.10835	0.08329	0.060397	0.04283	0.01328	1
0.10267	0.13086	0.11373	0.10916	0.12513	0.10334	0.13547	0.19404	0.13141	0.087642	0.11367	0.10414	0.15196	0.13042	0.15071	0.1276	0.11484	0.11929	0.12694	0.097441	0.014224	0.041291	0.063666	0.050655	0.13973	0.13302	0.072371	0.058814	0.030862	0.0098846	0.011813	0.03498	0.03829	0.099247	0.12684	0.11352	0.085786	0.058076	0.035433	0.011705	1
0.20374	0.14597	0.10366	0.16418	0.19878	0.2047	0.15673	0.10019	0.16084	0.1385	0.15535	0.17042	0.15146	0.17984	0.12385	0.14946	0.15991	0.15726	0.15373	0.17104	0.018342	0.062125	0.078847	0.095126	0.10719	0.14614	0.10642	0.085586	0.065111	0.021844	0.019402	0.033926	0.088063	0.11289	0.13431	0.14942	0.14042	0.078643	0.029726	0.0049725	1
0.12966	0.10612	0.18904	0.19004	0.20821	0.13622	0.10964	0.16046	0.14234	0.11583	0.16508	0.17509	0.15204	0.17744	0.13251	0.1423	0.1263	0.12816	0.1317	0.14631	0.025369	0.055146	0.090643	0.092494	0.10397	0.10408	0.1189	0.076748	0.058437	0.018972	0.01096	0.027196	0.086734	0.099047	0.14339	0.17925	0.1104	0.06786	0.01396	0.0010579	1
0.17635	0.19192	0.1133	0.10628	0.18546	0.18703	0.18829	0.11017	0.14237	0.1617	0.13928	0.14954	0.17683	0.15513	0.17739	0.12734	0.13717	0.17151	0.1619	0.15154	0.01867	0.054541	0.078145	0.088552	0.11888	0.13776	0.12586	0.07571	0.061603	0.015281	0.01096	0.060964	0.048132	0.11931	0.14311	0.14473	0.11382	0.081717	0.046076	0.005419	1
0.19922	0.14489	0.089875	0.15242	0.17554	0.21857	0.1353	0.10774	0.18023	0.15756	0.15413	0.1631	0.16776	0.15355	0.17368	0.12047	0.15612	0.15723	0.15284	0.15582	0.020321	0.061704	0.086811	0.090099	0.11927	0.12328	0.11935	0.07621	0.056706	0.026779	0.018583	0.040774	0.051871	0.12203	0.14445	0.14581	0.13777	0.075853	0.039374	0.0033576	1
0.18458	0.11356	0.12078	0.20351	0.19087	0.1826	0.10801	0.15492	0.14794	0.15179	0.16335	0.17511	0.17512	0.16606	0.14896	0.14026	0.15467	0.13435	0.1441	0.15696	0.023789	0.063967	0.089259	0.093587	0.11193	0.11662	0.12036	0.077964	0.05906	0.025312	0.020473	0.024954	0.091265	0.10142	0.14195	0.16215	0.13519	0.080901	0.019253	0.0017337	1
0.12494	0.14757	0.16217	0.16164	0.10379	0.15892	0.13468	0.15111	0.13823	0.18027	0.071802	0.07796	0.10991	0.1507	0.19012	0.21731	0.15161	0.12831	0.1554	0.20838	0.01696	0.032391	0.056886	0.07182	0.11266	0.17143	0.13439	0.072117	0.042206	0.020979	0.01822	0.037599	0.038821	0.053854	0.094239	0.1803	0.16255	0.082578	0.041404	0.019345	1
0.098537	0.13059	0.17046	0.1615	0.14756	0.14959	0.18803	0.20767	0.16166	0.18673	0.087616	0.14705	0.19333	0.19399	0.14303	0.12884	0.15413	0.20267	0.16473	0.17974	0.016166	0.054685	0.057273	0.099389	0.18377	0.16901	0.10071	0.058312	0.045972	0.020778	0.016582	0.034186	0.046079	0.080463	0.14192	0.19454	0.11387	0.085914	0.065754	0.024589	1
0.16044	0.17682	0.15994	0.14461	0.1943	0.20797	0.16928	0.18683	0.2077	0.24348	0.13088	0.17805	0.21036	0.23875	0.16596	0.16517	0.20405	0.19638	0.18324	0.17883	0.022508	0.069761	0.10412	0.096723	0.15124	0.19915	0.12887	0.082671	0.045616	0.020053	0.0098915	0.038365	0.079328	0.1134	0.19958	0.15486	0.12993	0.10644	0.066933	0.024581	1
0.12648	0.17515	0.16542	0.11854	0.16839	0.15859	0.183	0.15659	0.1855	0.26218	0.090988	0.10869	0.17263	0.2076	0.23396	0.16337	0.15077	0.18873	0.20731	0.1735	0.026841	0.053622	0.088924	0.086236	0.12892	0.18212	0.13949	0.083539	0.046909	0.016161	0.013321	0.029162	0.049647	0.083743	0.16054	0.20537	0.11944	0.09251	0.073232	0.023844	1
0.13963	0.16864	0.14853	0.14127	0.13709	0.14284	0.17567	0.13301	0.1604	0.21995	0.085052	0.088078	0.13739	0.18315	0.20413	0.22116	0.14435	0.14317	0.20321	0.1849	0.023908	0.041699	0.069538	0.077785	0.11841	0.17575	0.13684	0.077001	0.045997	0.019541	0.020044	0.031833	0.04322	0.068672	0.12839	0.20281	0.13886	0.082098	0.043384	0.029882	1
0.16651	0.20069	0.12919	0.1376	0.17338	0.090764	0.12606	0.17116	0.15217	0.15114	0.15396	0.17698	0.1518	0.12898	0.14983	0.15597	0.15585	0.15658	0.13757	0.12866	0.010743	0.062017	0.062947	0.11317	0.11543	0.13207	0.10332	0.072781	0.056406	0.017129	0.014563	0.052976	0.06934	0.10538	0.15914	0.13918	0.089731	0.057203	0.04761	0.016875	1
0.11181	0.16326	0.17134	0.12693	0.14198	0.1868	0.097959	0.13647	0.16375	0.16685	0.11532	0.14569	0.17309	0.13863	0.12296	0.15315	0.17006	0.14991	0.15357	0.14156	0.017409	0.03858	0.070519	0.1195	0.10995	0.12667	0.10891	0.087983	0.043418	0.0082738	0.0053945	0.036702	0.083567	0.097858	0.11467	0.16693	0.097489	0.05675	0.046797	0.029289	1
0.15944	0.16448	0.12699	0.15042	0.17425	0.097013	0.14127	0.15422	0.17641	0.14467	0.12738	0.14677	0.18003	0.15493	0.1302	0.12488	0.16045	0.15473	0.16377	0.14851	0.017617	0.039806	0.079506	0.093516	0.13657	0.11284	0.10569	0.080511	0.051034	0.022238	0.0031782	0.047063	0.078069	0.07947	0.16514	0.13302	0.1032	0.065882	0.043899	0.02111	1
0.13307	0.20174	0.14679	0.13004	0.17707	0.13021	0.10347	0.16563	0.14888	0.16221	0.11879	0.16314	0.18182	0.14045	0.13012	0.17257	0.15781	0.15398	0.14948	0.13439	0.01412	0.052078	0.067312	0.11277	0.11425	0.12847	0.11104	0.08656	0.049777	0.013448	0.0055348	0.04547	0.093847	0.084627	0.15327	0.13692	0.10559	0.055121	0.044611	0.024517	1
0.15451	0.12982	0.14768	0.18566	0.098737	0.13588	0.1433	0.15687	0.15264	0.17986	0.13545	0.13907	0.17845	0.18729	0.11729	0.11973	0.16459	0.14857	0.16179	0.13337	0.015113	0.054914	0.072588	0.10599	0.13957	0.12732	0.089068	0.076561	0.056087	0.014406	0.01215	0.050844	0.062792	0.079261	0.16698	0.13019	0.1102	0.071808	0.043807	0.017338	1
0.12448	0.19057	0.20541	0.21057	0.13486	0.12169	0.19137	0.20957	0.11252	0.086828	0.17826	0.22185	0.17028	0.16968	0.18146	0.15809	0.17257	0.1357	0.11871	0.092991	0.010267	0.058495	0.095626	0.090787	0.11811	0.19174	0.1139	0.059057	0.04538	0.012542	0.019379	0.058755	0.098368	0.10122	0.15284	0.18553	0.098113	0.056823	0.019929	0.0033617	1
0.10374	0.13353	0.16854	0.177	0.10769	0.10444	0.15263	0.21077	0.1006	0.070819	0.16836	0.17859	0.18013	0.14921	0.16132	0.1334	0.11239	0.081337	0.062713	0.092933	0.015916	0.053401	0.04885	0.11272	0.15013	0.12736	0.076551	0.047424	0.013315	0.016809	0.019995	0.049415	0.062015	0.11818	0.17297	0.10449	0.057852	0.047058	0.024591	0.0073046	1
0.19184	0.15707	0.12326	0.22249	0.20007	0.17839	0.13362	0.11899	0.25159	0.14306	0.20795	0.20583	0.16433	0.18689	0.20404	0.16648	0.18686	0.15735	0.13664	0.10678	0.023411	0.070639	0.076731	0.091351	0.21334	0.14982	0.10004	0.073206	0.049527	0.015517	0.018605	0.059167	0.097805	0.13296	0.13823	0.15486	0.15414	0.054609	0.036746	0.01136	1
0.13739	0.12239	0.21037	0.19383	0.16271	0.12224	0.12432	0.2455	0.14249	0.1095	0.24293	0.1754	0.17084	0.18621	0.17118	0.16608	0.14917	0.13331	0.10489	0.067293	0.02381	0.069766	0.084845	0.070828	0.18824	0.16235	0.096418	0.049118	0.03672	0.0046003	0.025824	0.057894	0.095201	0.095866	0.15609	0.18261	0.082442	0.052476	0.028486	0.0057192	1
0.14239	0.13184	0.21902	0.20355	0.15414	0.13164	0.13686	0.25288	0.12893	0.11176	0.20698	0.20805	0.1716	0.18114	0.19473	0.15007	0.16968	0.13358	0.11869	0.084823	0.012636	0.063297	0.10532	0.07847	0.16009	0.18056	0.105	0.054868	0.043392	0.0071313	0.02809	0.049139	0.10067	0.099028	0.15587	0.17871	0.11113	0.05908	0.023817	0.0054073	1
0.084023	0.13364	0.12745	0.092053	0.14608	0.13709	0.13304	0.14603	0.096971	0.13219	0.13055	0.12613	0.1297	0.12444	0.13421	0.13683	0.10971	0.092618	0.11871	0.11907	0.01353	0.033106	0.057153	0.10453	0.11551	0.12404	0.075084	0.050151	0.033427	0.0080495	0.01282	0.035036	0.067462	0.078918	0.10485	0.1084	0.073049	0.076304	0.045412	0.0094922	1
0.094659	0.14884	0.10833	0.09308	0.15937	0.13141	0.161	0.1068	0.093728	0.15918	0.12848	0.13059	0.12992	0.13959	0.13696	0.10643	0.10233	0.12337	0.13474	0.10822	0.014145	0.032865	0.065065	0.10001	0.12899	0.10333	0.075096	0.053313	0.034788	0.013934	0.012137	0.034131	0.06881	0.077602	0.12068	0.095411	0.089815	0.083048	0.027456	0.014828	1
0.10879	0.1507	0.097036	0.1032	0.14082	0.14985	0.14595	0.086577	0.1048	0.16642	0.13924	0.13238	0.15117	0.12936	0.13356	0.10205	0.1096	0.13543	0.12507	0.10402	0.013085	0.038973	0.065271	0.099821	0.13389	0.097925	0.072022	0.056771	0.034849	0.015655	0.017373	0.03772	0.061513	0.090159	0.099132	0.10678	0.10831	0.065335	0.02553	0.017514	1
0.0837	0.070807	0.13625	0.14267	0.089241	0.11798	0.14725	0.16014	0.11556	0.075144	0.13322	0.12114	0.12458	0.11969	0.093761	0.090775	0.12184	0.12635	0.10088	0.09143	0.011166	0.034976	0.068077	0.096581	0.096985	0.082929	0.070366	0.062222	0.034946	0.0056016	0.0090429	0.027825	0.053244	0.087004	0.11456	0.08602	0.089666	0.078505	0.019556	0.0025362	1
0.092177	0.069885	0.11621	0.15138	0.09058	0.11008	0.14242	0.14881	0.14307	0.086701	0.14144	0.12497	0.13403	0.10599	0.12055	0.090495	0.097581	0.1282	0.11809	0.097796	0.013504	0.03704	0.071714	0.094703	0.10543	0.090171	0.065864	0.052837	0.035366	0.0089764	0.014993	0.025473	0.048664	0.083548	0.11093	0.098124	0.082505	0.077907	0.036366	0.001554	1
0.088026	0.15602	0.19761	0.1731	0.13698	0.20524	0.20908	0.13824	0.07772	0.19861	0.19498	0.19602	0.16914	0.13191	0.14173	0.17856	0.18235	0.13801	0.12614	0.12258	0.02198	0.070957	0.075835	0.1173	0.12049	0.13999	0.11112	0.099203	0.026403	0.0036238	0.010043	0.040203	0.087228	0.14277	0.12416	0.12477	0.13134	0.077159	0.042973	0.0054965	1
0.10517	0.096667	0.17917	0.21518	0.12564	0.13556	0.18152	0.19143	0.11673	0.057922	0.16484	0.14874	0.10697	0.1376	0.18129	0.14502	0.13083	0.12048	0.1282	0.1375	0.012679	0.021446	0.077399	0.098831	0.13553	0.1441	0.11854	0.053934	0.022249	0.017959	0.013468	0.043568	0.069723	0.12379	0.1019	0.12524	0.11782	0.057006	0.043716	0.0099007	1
0.083391	0.10558	0.18417	0.18929	0.12415	0.13446	0.17079	0.18015	0.109	0.078158	0.15527	0.10621	0.13899	0.18534	0.13882	0.13001	0.12804	0.12549	0.13429	0.12206	0.014594	0.016053	0.084091	0.080828	0.13458	0.14543	0.10579	0.054928	0.034042	0.0088885	0.0056335	0.038767	0.094513	0.086492	0.10281	0.14754	0.094057	0.064148	0.042556	0.0070503	1
0.096511	0.17671	0.21537	0.13119	0.1316	0.17555	0.19162	0.12861	0.056424	0.18836	0.17297	0.16672	0.12978	0.15748	0.19026	0.14793	0.13594	0.12858	0.12228	0.13312	0.027198	0.041548	0.064065	0.11216	0.11391	0.14541	0.12795	0.071584	0.030105	0.013235	0.0164	0.04488	0.095461	0.097894	0.099883	0.16236	0.11031	0.067111	0.041232	0.0046536	1
0.091966	0.10508	0.18708	0.20356	0.1172	0.1325	0.17135	0.18237	0.11113	0.068512	0.15848	0.1112	0.12173	0.17616	0.16145	0.13375	0.12013	0.12528	0.13666	0.13639	0.014201	0.014524	0.080775	0.08551	0.13417	0.14373	0.10865	0.055098	0.033754	0.012818	0.0091393	0.040065	0.085766	0.098826	0.094814	0.1499	0.095067	0.061	0.045163	0.0077077	1
0.19046	0.13905	0.10852	0.1948	0.24701	0.18689	0.17207	0.10463	0.17118	0.12199	0.16532	0.18334	0.16297	0.15812	0.14478	0.13482	0.20081	0.16297	0.14759	0.16313	0.011518	0.049461	0.068835	0.11322	0.13319	0.16788	0.12554	0.080586	0.043472	0.020763	0.024423	0.050014	0.072887	0.10881	0.1637	0.14773	0.12711	0.064872	0.038548	0.02028	1
0.19014	0.16737	0.14976	0.14603	0.22177	0.22468	0.14584	0.12495	0.11539	0.14802	0.16963	0.16112	0.14403	0.13183	0.20678	0.16745	0.1502	0.17859	0.15204	0.16047	0.014164	0.036654	0.076446	0.11124	0.15662	0.14577	0.10055	0.080229	0.064728	0.026853	0.019704	0.048076	0.070129	0.12146	0.15652	0.16956	0.11852	0.056688	0.040396	0.012426	1
0.19822	0.14997	0.1117	0.17508	0.24383	0.21246	0.17251	0.10651	0.15655	0.12773	0.18914	0.16881	0.15958	0.15649	0.1313	0.20323	0.18003	0.14711	0.1734	0.14627	0.015561	0.050223	0.067777	0.11332	0.15482	0.1559	0.11299	0.078495	0.051201	0.023619	0.021941	0.055749	0.072434	0.10841	0.17298	0.14889	0.13341	0.053961	0.041519	0.016385	1
0.14835	0.13	0.2119	0.23672	0.14419	0.13676	0.08897	0.17009	0.086747	0.11249	0.13518	0.12443	0.14968	0.14177	0.20309	0.18477	0.13956	0.13685	0.12249	0.1305	0.0048195	0.036758	0.070072	0.10122	0.12981	0.13786	0.11182	0.067405	0.057718	0.021099	0.0097529	0.039459	0.085312	0.12207	0.15395	0.13671	0.08309	0.074075	0.017743	0.011483	1
0.15686	0.12827	0.15821	0.23003	0.21604	0.16484	0.1232	0.14721	0.14053	0.085157	0.16956	0.15964	0.14315	0.15152	0.12825	0.19273	0.17959	0.14017	0.14459	0.1369	0.0073725	0.044807	0.066173	0.11083	0.12494	0.15533	0.11989	0.076119	0.05053	0.015469	0.015351	0.050634	0.071287	0.1239	0.14506	0.15634	0.10445	0.054625	0.046521	0.0038818	1
0.13602	0.10786	0.15117	0.10558	0.20663	0.26239	0.23377	0.15946	0.13953	0.074026	0.090392	0.099059	0.15011	0.12545	0.15371	0.16898	0.24092	0.18626	0.16494	0.18206	0.0059987	0.027746	0.08119	0.1167	0.11532	0.15148	0.11396	0.062582	0.076095	0.031285	0.0013738	0.0047251	0.038846	0.11054	0.19966	0.18849	0.084852	0.094736	0.0501	0.007172	1
0.1627	0.10968	0.13224	0.13055	0.12699	0.11974	0.22845	0.27505	0.19166	0.14522	0.086685	0.084521	0.12287	0.10491	0.16741	0.19953	0.26149	0.22006	0.18812	0.2039	0.0030389	0.05085	0.10707	0.087803	0.13605	0.13524	0.071227	0.113	0.091716	0.020033	0.0013206	0.0053787	0.023342	0.10157	0.15838	0.21953	0.14207	0.061057	0.081276	0.02216	1
0.18261	0.11675	0.16884	0.16817	0.16959	0.15193	0.21275	0.26945	0.21117	0.15789	0.092797	0.12816	0.10624	0.17919	0.21687	0.26225	0.20702	0.18354	0.21522	0.22632	0.01124	0.067561	0.084915	0.11437	0.15026	0.10748	0.13536	0.15161	0.069529	0.014935	0.0026827	0.012336	0.043158	0.11433	0.2198	0.19652	0.12037	0.10444	0.086153	0.014793	1
0.17684	0.18196	0.18786	0.17232	0.2139	0.26521	0.23601	0.17001	0.12478	0.045004	0.15909	0.1251	0.15366	0.16795	0.23225	0.17363	0.1655	0.18243	0.21195	0.18435	0.015408	0.039192	0.080912	0.10657	0.14686	0.14649	0.10103	0.13392	0.085047	0.028771	0.0013246	0.006991	0.089988	0.19514	0.18382	0.14595	0.15426	0.08219	0.022563	0.0024558	1
0.17633	0.1272	0.17919	0.20105	0.15741	0.17939	0.21657	0.27957	0.18601	0.16478	0.1128	0.11265	0.15053	0.18989	0.26472	0.23001	0.19227	0.20186	0.2356	0.19023	0.015512	0.064848	0.084594	0.12251	0.15783	0.10944	0.15811	0.14239	0.067404	0.0094426	0.0022232	0.016193	0.05483	0.13603	0.22298	0.17052	0.12114	0.13697	0.061278	0.014161	1
0.18097	0.25484	0.18167	0.17843	0.16024	0.11247	0.086815	0.15655	0.18142	0.14154	0.14428	0.12468	0.1204	0.1598	0.2574	0.26912	0.1513	0.13792	0.14663	0.14372	0.001368	0.010961	0.058007	0.13448	0.22394	0.15275	0.079389	0.071628	0.059707	0.034077	0.017007	0.049936	0.11813	0.14119	0.13237	0.11358	0.095793	0.070939	0.079406	0.010089	1
0.19126	0.27849	0.13443	0.17759	0.10816	0.092469	0.12261	0.21023	0.18331	0.10345	0.12756	0.11879	0.15156	0.24892	0.24505	0.14891	0.13329	0.13896	0.13926	0.13913	0.0017269	0.025142	0.056007	0.14058	0.20155	0.12706	0.090431	0.057735	0.057827	0.036835	0.014596	0.055552	0.12088	0.12538	0.12507	0.1226	0.081906	0.090132	0.055956	0.0035198	1
0.19574	0.22293	0.22056	0.15628	0.17	0.10593	0.089115	0.15125	0.19321	0.15406	0.13928	0.12122	0.14052	0.21132	0.28851	0.21941	0.14158	0.13839	0.14564	0.14012	0.0019008	0.015964	0.067692	0.15644	0.21357	0.1251	0.089677	0.074744	0.066555	0.026632	0.0098238	0.052773	0.12489	0.1396	0.13213	0.12079	0.09509	0.069573	0.079857	0.012074	1
0.23978	0.2125	0.17079	0.18882	0.12157	0.088251	0.12892	0.16968	0.15226	0.070166	0.12937	0.136	0.11401	0.14705	0.24024	0.2649	0.19789	0.11085	0.11754	0.11816	0.0024792	0.0066242	0.049899	0.092482	0.17337	0.21774	0.10455	0.065493	0.043175	0.019215	0.028908	0.060484	0.11963	0.11382	0.10682	0.095193	0.10544	0.08426	0.057837	0.00341	1
0.13517	0.16621	0.25201	0.1954	0.20926	0.20818	0.13519	0.088772	0.10664	0.14587	0.14925	0.15456	0.14299	0.12426	0.13769	0.20325	0.27121	0.19414	0.13546	0.13319	0.0010768	0.0083075	0.057752	0.11511	0.22635	0.16927	0.069266	0.093207	0.059505	0.019592	0.012648	0.048157	0.08948	0.1357	0.16704	0.13029	0.082198	0.077744	0.037995	0.031131	1
0.13056	0.17664	0.1085	0.095666	0.19863	0.1003	0.13016	0.16567	0.082703	0.03407	0.14646	0.11971	0.11425	0.10905	0.11818	0.11252	0.12216	0.14168	0.13824	0.10516	0.010875	0.028971	0.052344	0.074709	0.085262	0.13077	0.10235	0.07582	0.036848	0.011726	0.014385	0.032703	0.077034	0.090126	0.13912	0.08843	0.076213	0.052883	0.028994	0.0085194	1
0.16743	0.10138	0.12042	0.17586	0.10418	0.14767	0.14996	0.067387	0.044707	0.028145	0.099166	0.094956	0.11033	0.11795	0.10863	0.12675	0.13216	0.094857	0.10985	0.10961	0.0014261	0.0082817	0.030222	0.066758	0.092173	0.1272	0.10865	0.086754	0.026668	0.0036221	0.020691	0.044472	0.063557	0.10573	0.078221	0.080201	0.079648	0.048053	0.023489	0.0079024	1
0.1332	0.17707	0.10903	0.09396	0.19805	0.10488	0.13719	0.16804	0.085957	0.037711	0.16567	0.11607	0.11813	0.10976	0.11164	0.11795	0.10923	0.13861	0.14927	0.10423	0.013512	0.033765	0.054575	0.076778	0.084944	0.12768	0.10577	0.075383	0.039297	0.01235	0.015059	0.031225	0.079463	0.096124	0.1399	0.094406	0.075598	0.050471	0.030336	0.0080149	1
0.12132	0.17146	0.11045	0.10136	0.18146	0.10248	0.12669	0.15796	0.066321	0.039724	0.11663	0.11372	0.10949	0.11613	0.11344	0.1202	0.13867	0.14251	0.10598	0.10959	0.0026924	0.020197	0.04224	0.074414	0.099031	0.14068	0.10036	0.077444	0.022478	0.010031	0.01451	0.04384	0.066413	0.086822	0.12482	0.080783	0.071998	0.057805	0.031911	0.011282	1
0.14903	0.14467	0.083884	0.17511	0.13108	0.10879	0.17417	0.10267	0.044948	0.031866	0.11371	0.10653	0.10753	0.12075	0.10199	0.12887	0.13875	0.10537	0.10458	0.11519	0.0022764	0.014304	0.034224	0.070146	0.09224	0.13969	0.10491	0.087001	0.023531	0.0037656	0.021561	0.046282	0.063326	0.10406	0.088447	0.08115	0.075256	0.055511	0.026407	0.0093716	1
0.10411	0.14354	0.16793	0.14296	0.10766	0.10726	0.15517	0.22485	0.17082	0.11544	0.14884	0.16864	0.12605	0.094902	0.15565	0.16866	0.15572	0.13294	0.12412	0.16131	0.013588	0.062467	0.087863	0.07033	0.097606	0.17505	0.082431	0.059504	0.047296	0.017775	0.012323	0.031342	0.058981	0.093536	0.14027	0.14725	0.11118	0.059975	0.041085	0.02004	1
0.16293	0.14368	0.12425	0.11898	0.12356	0.20321	0.2011	0.13787	0.11284	0.12308	0.16093	0.16593	0.1666	0.14067	0.1183	0.18998	0.16263	0.14956	0.10449	0.10818	0.0064715	0.045995	0.10572	0.1259	0.087241	0.087239	0.14992	0.067013	0.041781	0.010325	0.017141	0.039235	0.080955	0.10866	0.12763	0.13921	0.10905	0.077563	0.028793	0.0030264	1
0.12101	0.10524	0.15385	0.15878	0.13186	0.10835	0.11246	0.17243	0.22567	0.16121	0.15803	0.17401	0.14017	0.096772	0.12991	0.17532	0.14533	0.15333	0.12254	0.15202	0.029431	0.062498	0.084929	0.065743	0.13175	0.14544	0.075951	0.067702	0.047412	0.015288	0.007077	0.040698	0.053084	0.097674	0.12987	0.14619	0.11332	0.075553	0.041126	0.020892	1
0.10994	0.11818	0.15901	0.15106	0.12998	0.10646	0.10925	0.18813	0.20666	0.15119	0.15819	0.16402	0.11618	0.10707	0.16552	0.14709	0.15878	0.12647	0.13578	0.16297	0.024824	0.058517	0.077552	0.061443	0.15212	0.14065	0.07486	0.073604	0.041652	0.014618	0.0077271	0.037458	0.058167	0.091899	0.13027	0.14546	0.11577	0.061373	0.04257	0.028916	1
0.0983	0.12338	0.15676	0.14704	0.11593	0.10222	0.11241	0.22078	0.18439	0.14161	0.16095	0.14131	0.10206	0.12029	0.1714	0.13384	0.14871	0.11714	0.14557	0.15694	0.017648	0.059041	0.07925	0.057347	0.1499	0.14245	0.071906	0.071593	0.041527	0.013949	0.010099	0.030426	0.060721	0.088056	0.13215	0.14422	0.10717	0.054105	0.045897	0.029072	1
0.18862	0.15087	0.15645	0.12624	0.19007	0.21093	0.14355	0.11333	0.11753	0.14687	0.1556	0.13165	0.17809	0.19417	0.14666	0.17033	0.16375	0.15797	0.14052	0.10683	0.010047	0.044727	0.065523	0.12932	0.13732	0.12374	0.10094	0.078464	0.056525	0.019185	0.01895	0.03274	0.079465	0.13721	0.16622	0.15607	0.074488	0.054611	0.036705	0.016684	1
0.19658	0.18512	0.14451	0.10418	0.19062	0.24999	0.19762	0.16658	0.095475	0.16555	0.19985	0.1724	0.16484	0.14461	0.1375	0.20868	0.16434	0.16398	0.17823	0.14833	0.021409	0.041952	0.08796	0.10355	0.16981	0.15539	0.10804	0.073211	0.063252	0.02053	0.022018	0.052576	0.079224	0.1042	0.17218	0.14659	0.13591	0.073938	0.034749	0.018952	1
0.2047	0.20756	0.16186	0.14841	0.12394	0.20966	0.25035	0.16277	0.15119	0.084267	0.16793	0.17412	0.15341	0.13994	0.19277	0.19167	0.17559	0.19337	0.14372	0.18161	0.012936	0.044414	0.078142	0.12269	0.14156	0.13888	0.10753	0.091188	0.084584	0.029433	0.016816	0.049656	0.075833	0.12168	0.16936	0.15468	0.14453	0.080622	0.026222	0.0083181	1
0.18266	0.16927	0.14195	0.14781	0.21553	0.22249	0.14701	0.10875	0.12599	0.13907	0.15916	0.15441	0.1304	0.17307	0.19877	0.15054	0.16677	0.1667	0.1527	0.14065	0.013339	0.035893	0.075305	0.11798	0.15429	0.13563	0.096641	0.079778	0.064312	0.023666	0.019403	0.03895	0.068324	0.13177	0.15189	0.17104	0.10354	0.057255	0.041545	0.0098682	1
0.18805	0.17184	0.13244	0.15312	0.21963	0.2141	0.15216	0.10844	0.13112	0.13877	0.17188	0.15577	0.14592	0.12983	0.20079	0.16336	0.14844	0.177	0.14686	0.15309	0.01494	0.036026	0.073678	0.10785	0.15832	0.14521	0.097197	0.08072	0.062281	0.022932	0.019397	0.045866	0.073243	0.12237	0.1437	0.167	0.11223	0.057984	0.043044	0.011665	1
0.15527	0.21114	0.20089	0.24522	0.19255	0.191	0.22756	0.2627	0.14197	0.1111	0.14536	0.1754	0.25301	0.21336	0.18671	0.19496	0.22538	0.19513	0.20122	0.16545	0.0099304	0.045246	0.11331	0.14947	0.11603	0.15454	0.19381	0.11823	0.050583	0.017216	0.010604	0.034796	0.11575	0.16274	0.15944	0.17797	0.17252	0.085739	0.04787	0.0029871	1
0.20047	0.17055	0.24055	0.26275	0.21473	0.18223	0.14408	0.29333	0.18058	0.13102	0.17504	0.25428	0.23799	0.19454	0.19901	0.2426	0.1982	0.20176	0.16885	0.15422	0.0065969	0.065464	0.13132	0.12349	0.12822	0.23863	0.15566	0.095333	0.042594	0.022316	0.020539	0.060708	0.12737	0.13927	0.15516	0.1828	0.18609	0.072885	0.04804	0.0054038	1
0.17465	0.2217	0.21043	0.27219	0.18567	0.15815	0.19986	0.27295	0.13545	0.11449	0.17032	0.25019	0.22147	0.19101	0.19836	0.22793	0.19991	0.20345	0.16532	0.14028	0.0066657	0.054288	0.12385	0.1367	0.11181	0.22118	0.15786	0.099507	0.04472	0.02194	0.020225	0.05877	0.12752	0.13504	0.1601	0.18753	0.17431	0.07381	0.038237	0.0036127	1
0.19482	0.18185	0.1374	0.22458	0.23319	0.20281	0.20158	0.18779	0.27201	0.20072	0.10076	0.19444	0.21935	0.2621	0.18432	0.18701	0.22371	0.23312	0.21376	0.20574	0.017356	0.065501	0.11776	0.12347	0.11551	0.22427	0.17632	0.10155	0.045003	0.024941	0.009853	0.033238	0.080115	0.14225	0.21175	0.16591	0.15742	0.12891	0.059181	0.021831	1
0.19559	0.18559	0.18095	0.26473	0.2706	0.18452	0.15706	0.13599	0.28796	0.17402	0.22956	0.25662	0.17966	0.19593	0.2327	0.22315	0.2134	0.19841	0.17961	0.13076	0.018677	0.085233	0.10264	0.10295	0.22561	0.20121	0.11687	0.075769	0.066434	0.017564	0.011145	0.075957	0.11529	0.14761	0.16479	0.18965	0.17976	0.06617	0.045766	0.015935	1
0.19026	0.18916	0.17065	0.20526	0.36567	0.17118	0.14807	0.30322	0.43525	0.25801	0.34856	0.22929	0.24391	0.32754	0.31397	0.23548	0.30107	0.19235	0.13394	0.11658	0.027205	0.11777	0.14225	0.19961	0.25334	0.23915	0.11858	0.094143	0.019549	0.0011455	0.02438	0.073107	0.1399	0.19656	0.17455	0.22488	0.18598	0.086842	0.07105	0.044955	1
0.14405	0.16766	0.11559	0.20917	0.25595	0.15661	0.12246	0.3005	0.3606	0.22062	0.25861	0.36527	0.28361	0.23275	0.31437	0.17021	0.14324	0.10947	0.099589	0.08695	0.031833	0.092439	0.14271	0.21999	0.22563	0.14681	0.12343	0.038853	0.0025323	0.0011521	0.034612	0.076639	0.13101	0.099694	0.2158	0.16156	0.11629	0.1109	0.071433	0.0061361	1
0.15155	0.18925	0.18234	0.16556	0.27192	0.27475	0.11685	0.1471	0.43345	0.34965	0.277	0.25224	0.26895	0.34499	0.24537	0.23115	0.30033	0.15146	0.11359	0.10035	0.029306	0.11816	0.1177	0.20539	0.25803	0.21287	0.11502	0.062758	0.01937	0.0027796	0.029563	0.06262	0.11551	0.18496	0.16247	0.21594	0.17951	0.086476	0.055122	0.046133	1
0.18713	0.1487	0.20225	0.31268	0.13374	0.11867	0.27558	0.41067	0.22673	0.21427	0.2049	0.25168	0.37049	0.29654	0.24864	0.32563	0.1954	0.149	0.1206	0.099405	0.012487	0.10537	0.12228	0.19403	0.24356	0.21652	0.10773	0.10345	0.0094049	0.00092562	0.01746	0.088154	0.13502	0.12801	0.22878	0.19978	0.12061	0.11941	0.081186	0.0031993	1
0.20721	0.17255	0.16676	0.32236	0.20482	0.13507	0.20792	0.47595	0.28273	0.25672	0.3034	0.21268	0.27205	0.37685	0.26594	0.25466	0.31306	0.17818	0.14546	0.11147	0.030048	0.10138	0.14665	0.19656	0.25637	0.24484	0.12595	0.10333	0.017388	0.00074219	0.014557	0.0782	0.15393	0.15913	0.2124	0.22831	0.15361	0.099203	0.10661	0.015372	1
0.16391	0.13887	0.24163	0.13427	0.12736	0.14141	0.16183	0.24875	0.26132	0.14811	0.07533	0.060424	0.12153	0.2221	0.23707	0.14384	0.091426	0.18273	0.41518	0.22072	0.018557	0.03583	0.070826	0.11984	0.092736	0.15799	0.18048	0.11665	0.060804	0.0327	0.0011523	0.022249	0.051963	0.062931	0.24711	0.14538	0.11543	0.11895	0.090312	0.031738	1
0.11719	0.1517	0.22937	0.10527	0.11662	0.12468	0.12788	0.22148	0.22649	0.14597	0.081394	0.074754	0.061265	0.09567	0.21483	0.24438	0.15667	0.10236	0.138	0.39336	0.025272	0.047688	0.038167	0.10602	0.10161	0.11002	0.10991	0.11805	0.076274	0.046691	0.0022842	0.0034418	0.033649	0.048535	0.15081	0.23685	0.10823	0.099218	0.086899	0.011273	1
0.25271	0.13432	0.17117	0.22041	0.1184	0.13329	0.15034	0.17994	0.25784	0.21335	0.074562	0.066645	0.076686	0.23928	0.27121	0.18459	0.10971	0.10541	0.39242	0.32412	0.032158	0.034968	0.064713	0.098815	0.10236	0.1431	0.18527	0.12656	0.080411	0.051438	0.0028106	0.018099	0.067038	0.073129	0.15096	0.25769	0.11292	0.10276	0.094053	0.033856	1
0.18951	0.13018	0.20169	0.18031	0.12335	0.13557	0.15307	0.21974	0.27844	0.17562	0.075191	0.060752	0.11566	0.23553	0.23276	0.14784	0.095731	0.15227	0.42963	0.25398	0.025597	0.034959	0.0729	0.1067	0.099877	0.16195	0.17922	0.1147	0.065196	0.039567	0.0010907	0.019036	0.059571	0.059298	0.21922	0.19233	0.11298	0.10738	0.10019	0.035973	1
0.13062	0.19593	0.18314	0.11594	0.13081	0.15094	0.18509	0.26047	0.16458	0.082268	0.07706	0.067963	0.057334	0.15628	0.21336	0.22955	0.12347	0.089137	0.29746	0.29786	0.011371	0.04619	0.040617	0.10891	0.09513	0.11067	0.13216	0.13515	0.083489	0.036527	0.0010735	0.0081245	0.042105	0.064422	0.23319	0.14309	0.11547	0.12295	0.073894	0.0027241	1
0.24484	0.2374	0.289	0.33677	0.14829	0.10964	0.15975	0.28723	0.23698	0.077584	0.19289	0.14787	0.11503	0.20684	0.34216	0.17354	0.14036	0.20071	0.28643	0.31342	0.0064894	0.051869	0.071486	0.15112	0.13579	0.16943	0.19889	0.14793	0.11152	0.02741	0.016099	0.065935	0.088027	0.1336	0.28493	0.16565	0.11682	0.10792	0.072161	0.024106	1
0.23868	0.21327	0.27278	0.35318	0.14307	0.10766	0.15861	0.2578	0.26347	0.12902	0.15416	0.11401	0.19606	0.33708	0.17426	0.14221	0.19588	0.28588	0.3167	0.22021	0.0080333	0.044622	0.090511	0.11416	0.15248	0.21734	0.19002	0.15585	0.086395	0.012737	0.028755	0.03617	0.09932	0.16483	0.24772	0.13091	0.14571	0.10412	0.054025	0.056056	1
0.26444	0.35418	0.19099	0.11524	0.1535	0.22946	0.28561	0.14479	0.1382	0.23952	0.092009	0.12305	0.25422	0.29025	0.1523	0.16709	0.20136	0.34102	0.33744	0.17841	0.00091325	0.01527	0.10191	0.15647	0.15593	0.18446	0.17925	0.12522	0.12052	0.011777	0.0030276	0.071467	0.12161	0.1706	0.12907	0.17396	0.14413	0.10667	0.12309	0.015586	1
0.21013	0.22975	0.28224	0.3373	0.11903	0.1095	0.18374	0.27663	0.226	0.12951	0.12691	0.10776	0.24471	0.32521	0.14271	0.16067	0.20571	0.28672	0.30336	0.19229	0.0025418	0.042199	0.097041	0.1067	0.15979	0.22269	0.18098	0.1587	0.078398	0.0058305	0.016057	0.03698	0.10897	0.19744	0.20526	0.12938	0.15476	0.094979	0.06043	0.054522	1
0.29163	0.19267	0.26609	0.3049	0.23886	0.10443	0.11941	0.22449	0.3017	0.16165	0.1597	0.13198	0.21301	0.34113	0.17348	0.15008	0.21351	0.3056	0.31728	0.22125	0.01282	0.048618	0.10198	0.1093	0.16215	0.22384	0.18576	0.17013	0.06893	0.028172	0.024405	0.052673	0.086421	0.16047	0.29253	0.14001	0.13798	0.11092	0.058416	0.046904	1
0.20343	0.2367	0.33632	0.18054	0.18188	0.27829	0.21226	0.28169	0.30072	0.25376	0.18532	0.14517	0.20196	0.32729	0.23794	0.16783	0.26642	0.36341	0.28478	0.28962	0.028502	0.048934	0.092909	0.18575	0.24281	0.1999	0.17607	0.12415	0.11807	0.022247	0.0013748	0.045096	0.13063	0.18455	0.17169	0.22469	0.18874	0.17655	0.077498	0.044542	1
0.27412	0.26027	0.14877	0.29236	0.31241	0.18633	0.21552	0.26114	0.2235	0.28874	0.17137	0.15038	0.19306	0.32274	0.26145	0.16519	0.19507	0.37271	0.35185	0.27332	0.017787	0.036039	0.10437	0.2212	0.16672	0.21085	0.19371	0.14829	0.086551	0.043895	0.022608	0.035858	0.10248	0.17081	0.26184	0.17372	0.17525	0.13837	0.11647	0.035332	1
0.24421	0.28414	0.20402	0.17751	0.33121	0.24268	0.17868	0.2305	0.22147	0.26559	0.1444	0.15624	0.16262	0.25169	0.34074	0.20027	0.15822	0.29596	0.38995	0.26408	0.012522	0.039914	0.10056	0.20256	0.15394	0.20373	0.18354	0.15875	0.093888	0.038527	0.011647	0.043068	0.1001	0.1522	0.22826	0.2461	0.13452	0.11965	0.11532	0.037361	1
0.26948	0.2423	0.14488	0.27232	0.30042	0.19987	0.1978	0.22165	0.23123	0.25858	0.14147	0.17849	0.14869	0.18623	0.32687	0.26077	0.17108	0.2054	0.37962	0.34117	0.01475	0.028584	0.086226	0.19709	0.19073	0.17437	0.19577	0.13065	0.094505	0.045876	0.024709	0.030342	0.087338	0.14735	0.21988	0.22448	0.13175	0.12457	0.12141	0.038497	1
0.25304	0.25499	0.19688	0.19439	0.32529	0.2384	0.18223	0.18605	0.19061	0.23801	0.19841	0.14879	0.15877	0.15298	0.22669	0.35772	0.23739	0.15352	0.25306	0.40135	0.0033427	0.024606	0.090053	0.18904	0.22751	0.14987	0.17201	0.14877	0.09305	0.041373	0.024298	0.069311	0.080479	0.14708	0.182	0.23954	0.13341	0.11229	0.10331	0.050849	1
0.23952	0.15084	0.1931	0.17283	0.25792	0.29716	0.23669	0.31244	0.26401	0.26738	0.19346	0.18712	0.29288	0.21145	0.19345	0.21026	0.21717	0.32704	0.27162	0.28666	0.012656	0.056885	0.12998	0.18774	0.228	0.20476	0.16808	0.098675	0.080598	0.021803	0.022561	0.075846	0.078596	0.11251	0.20505	0.21139	0.18651	0.16882	0.09386	0.041545	1
0.14603	0.19198	0.17414	0.27	0.29546	0.26311	0.31075	0.2733	0.27475	0.28753	0.19162	0.23378	0.28481	0.15817	0.17762	0.23762	0.28307	0.32896	0.26799	0.31442	0.026557	0.053301	0.12202	0.20295	0.24936	0.20794	0.16308	0.12738	0.068334	0.02141	0.018419	0.043667	0.078113	0.15343	0.2083	0.23692	0.19076	0.16239	0.11285	0.039252	1
0.18459	0.16711	0.23202	0.30975	0.26399	0.32443	0.26358	0.28954	0.26657	0.29952	0.187	0.27368	0.27278	0.1742	0.1965	0.26665	0.28868	0.31095	0.29733	0.32718	0.025237	0.067714	0.11051	0.19165	0.2665	0.22704	0.16647	0.14121	0.065721	0.031568	0.022478	0.044877	0.096173	0.14868	0.22555	0.24056	0.20556	0.15942	0.099154	0.04536	1
0.26343	0.14675	0.2065	0.15955	0.26415	0.30916	0.26489	0.31466	0.26698	0.26937	0.18953	0.23467	0.27023	0.18395	0.20842	0.21579	0.27292	0.32571	0.24997	0.30941	0.0045648	0.074567	0.1331	0.19407	0.21805	0.21336	0.16966	0.10931	0.078423	0.030051	0.027523	0.070381	0.07694	0.12938	0.19986	0.22783	0.18473	0.17668	0.090004	0.041974	1
0.15226	0.1413	0.18401	0.24061	0.28297	0.20081	0.27551	0.26504	0.26172	0.25783	0.18849	0.1935	0.19187	0.31156	0.18791	0.17319	0.20959	0.22895	0.32779	0.26492	0.028434	0.063316	0.088764	0.16865	0.23903	0.22012	0.1504	0.093294	0.05384	0.031063	0.016215	0.062618	0.072921	0.10083	0.2111	0.21783	0.19604	0.13947	0.091809	0.033183	1
0.042649	0.060642	0.08807	0.11202	0.09091	0.09062	0.14297	0.11714	0.11143	0.078672	0.088728	0.083762	0.10206	0.10625	0.082451	0.10165	0.077995	0.090308	0.10719	0.095463	0.0011979	0.024603	0.093439	0.065294	0.06732	0.079504	0.059777	0.027517	0.03503	0.012213	0.0027239	0.0085809	0.040332	0.071918	0.07853	0.099478	0.079872	0.0445	0.033821	0.0085149	1
0.043014	0.068567	0.10326	0.093868	0.088935	0.11426	0.14543	0.11136	0.11588	0.068096	0.088963	0.076294	0.094704	0.10881	0.097803	0.096456	0.087722	0.076992	0.11647	0.1034	0.00085949	0.016827	0.083675	0.078664	0.073787	0.079166	0.070572	0.029351	0.028712	0.01159	0.0027952	0.0085487	0.045382	0.074232	0.079117	0.094075	0.070455	0.049448	0.036372	0.012705	1
0.069107	0.090366	0.11811	0.096466	0.07493	0.12674	0.11351	0.11707	0.091301	0.079463	0.075793	0.096376	0.10838	0.10422	0.10185	0.091085	0.070381	0.11323	0.11224	0.10198	0.0010298	0.012916	0.086135	0.072742	0.078526	0.085422	0.065109	0.025547	0.041321	0.019846	0.0034073	0.018337	0.053909	0.060547	0.096502	0.10454	0.067709	0.043964	0.030497	0.011131	1
0.064699	0.044637	0.062836	0.095971	0.10855	0.087061	0.094982	0.14361	0.11397	0.12052	0.091624	0.08524	0.10206	0.10425	0.075997	0.099253	0.073765	0.095741	0.11718	0.09718	0.0055702	0.049413	0.081388	0.053774	0.071075	0.076245	0.046546	0.039296	0.038333	0.0079777	0.003084	0.008423	0.02468	0.074799	0.080822	0.095256	0.093886	0.043952	0.033802	0.012332	1
0.042938	0.048176	0.077942	0.092783	0.093282	0.10686	0.14179	0.1394	0.1132	0.085647	0.091396	0.087685	0.08157	0.10709	0.10886	0.088132	0.10057	0.082689	0.086241	0.10622	0.0061833	0.022702	0.081298	0.086998	0.069959	0.073596	0.068088	0.033067	0.020794	0.0086288	0.0048676	0.0083952	0.027972	0.075397	0.088454	0.085576	0.084547	0.043028	0.041235	0.011458	1
0.046658	0.035639	0.081268	0.10895	0.05598	0.096019	0.1985	0.1455	0.1142	0.074364	0.053397	0.1075	0.12756	0.092927	0.088095	0.1281	0.13781	0.080111	0.0548	0.094507	0.0087341	0.050749	0.055003	0.067315	0.08016	0.077323	0.078422	0.039997	0.018631	0.0026675	0.0015666	0.0053196	0.020365	0.063182	0.11383	0.12427	0.06047	0.051925	0.032897	0.0048968	1
0.084599	0.039872	0.053884	0.12513	0.10563	0.069437	0.13621	0.17147	0.13476	0.095178	0.12666	0.049827	0.065126	0.11671	0.12662	0.092411	0.093326	0.14652	0.12959	0.072219	0.0046894	0.045618	0.07295	0.077141	0.080712	0.086356	0.054937	0.049559	0.030316	0.0099948	0.0113	0.013058	0.030225	0.043527	0.085331	0.10968	0.12536	0.0541	0.024971	0.0089306	1
0.077257	0.038254	0.053573	0.12207	0.099271	0.068822	0.12951	0.16984	0.13026	0.096739	0.10705	0.043007	0.073042	0.13061	0.11767	0.087723	0.10109	0.14806	0.11564	0.0595	0.0047402	0.04466	0.067723	0.074629	0.08048	0.085734	0.052939	0.048724	0.027807	0.0082954	0.0083209	0.011782	0.027194	0.041558	0.085755	0.11606	0.11848	0.051031	0.023431	0.0095146	1
0.040362	0.037272	0.096858	0.10655	0.058716	0.096902	0.16904	0.13935	0.1022	0.057233	0.043085	0.056717	0.11375	0.12228	0.091881	0.089353	0.13511	0.12668	0.068029	0.058053	0.0029913	0.035589	0.054125	0.067317	0.077153	0.081975	0.05904	0.047239	0.024877	0.0024955	0.0019467	0.0067922	0.017571	0.052173	0.096005	0.13744	0.07437	0.040652	0.022508	0.0044692	1
0.03624	0.09606	0.10532	0.059375	0.10154	0.17448	0.14376	0.10359	0.059304	0.063525	0.053574	0.066871	0.12502	0.12869	0.089436	0.092189	0.12742	0.12044	0.069868	0.063298	0.007874	0.023386	0.057848	0.06375	0.079083	0.080719	0.071304	0.053118	0.024466	0.0046487	0.0029921	0.011122	0.022744	0.059399	0.12931	0.12115	0.060769	0.034764	0.020182	0.0051784	1
0.069324	0.077668	0.085003	0.096318	0.085163	0.063276	0.046167	0.085305	0.12014	0.11703	0.12045	0.10161	0.07723	0.083512	0.075389	0.092101	0.087746	0.082023	0.053927	0.071434	0.013248	0.033208	0.065113	0.071376	0.067113	0.050282	0.041812	0.059362	0.022743	0.0023314	0.013137	0.012943	0.031622	0.10576	0.059727	0.059305	0.063402	0.036815	0.034788	0.0061639	1
0.061925	0.073883	0.08557	0.096142	0.085072	0.060165	0.046112	0.078929	0.12223	0.11006	0.118	0.085785	0.081265	0.078825	0.073776	0.096779	0.086801	0.069557	0.057447	0.075512	0.012645	0.031822	0.066894	0.065583	0.05762	0.052887	0.042845	0.061458	0.018019	0.0019086	0.0089231	0.010539	0.040116	0.097387	0.051981	0.060158	0.062002	0.038619	0.033196	0.0071647	1
0.081376	0.074817	0.081509	0.078196	0.090701	0.075535	0.057988	0.051799	0.075838	0.13566	0.070192	0.11746	0.07831	0.07372	0.070571	0.076415	0.11454	0.090799	0.065895	0.056313	0.0096493	0.025337	0.056024	0.065927	0.072626	0.049358	0.037783	0.062964	0.025359	0.0023067	0.012877	0.021407	0.018785	0.063141	0.1078	0.054604	0.048801	0.034373	0.03282	0.011051	1
0.082079	0.07479	0.081781	0.079807	0.09137	0.076938	0.055507	0.052855	0.07731	0.13812	0.077679	0.11667	0.075323	0.072997	0.069976	0.079232	0.11681	0.089944	0.065439	0.059544	0.01026	0.025517	0.057455	0.066216	0.071519	0.048689	0.039369	0.065652	0.023732	0.0023145	0.013635	0.019287	0.019807	0.068784	0.10569	0.054147	0.048561	0.033882	0.034455	0.011888	1
0.19116	0.07829	0.069391	0.062543	0.085804	0.092463	0.1008	0.068001	0.044216	0.070417	0.15408	0.097111	0.074805	0.060492	0.099517	0.13981	0.085972	0.057052	0.052859	0.055039	0.013853	0.04081	0.037849	0.035871	0.055874	0.076469	0.097463	0.04978	0.021507	0.005956	0.031735	0.031645	0.03496	0.085839	0.11421	0.050035	0.038049	0.033274	0.009927	0.0051795	1
0.083831	0.081083	0.12505	0.15027	0.096789	0.10219	0.14602	0.11189	0.093571	0.1372	0.091446	0.091072	0.16886	0.14028	0.080104	0.10317	0.13542	0.10573	0.095941	0.12091	0.0045129	0.050955	0.047207	0.080675	0.13546	0.083951	0.037384	0.07956	0.035909	0.0085068	0.0039543	0.023612	0.046944	0.098372	0.11923	0.088508	0.077119	0.056077	0.040345	0.014376	1
0.10612	0.16422	0.14354	0.096022	0.14159	0.11001	0.077504	0.10911	0.19	0.11034	0.11276	0.20823	0.13424	0.089965	0.10064	0.13269	0.10707	0.093425	0.12933	0.14335	0.014228	0.040452	0.069491	0.078369	0.12925	0.11702	0.043753	0.053005	0.051734	0.022326	0.0096992	0.035602	0.07854	0.094107	0.085551	0.12959	0.08146	0.056309	0.027741	0.01921	1
0.095388	0.16056	0.14398	0.09085	0.14261	0.12173	0.097326	0.10281	0.17378	0.11039	0.1085	0.1209	0.21415	0.11867	0.086972	0.10836	0.12675	0.11479	0.093242	0.14309	0.014371	0.034479	0.073073	0.075572	0.12849	0.11538	0.064203	0.043539	0.047956	0.019622	0.012684	0.031979	0.060489	0.10615	0.093082	0.11182	0.089049	0.074763	0.030586	0.0088456	1
0.085771	0.11594	0.10095	0.15068	0.16609	0.089616	0.13468	0.12943	0.075699	0.089143	0.089869	0.16914	0.11314	0.08274	0.12778	0.12515	0.092049	0.08585	0.12795	0.13245	0.01832	0.035196	0.043905	0.10645	0.087624	0.044384	0.095359	0.084773	0.044206	0.0085421	0.0014573	0.010954	0.070279	0.10748	0.10368	0.097671	0.1007	0.05016	0.018126	0.0076503	1
0.11356	0.10161	0.1581	0.16009	0.091546	0.14193	0.12636	0.084732	0.10186	0.18923	0.090921	0.16245	0.15462	0.092362	0.10244	0.14908	0.11697	0.10433	0.1241	0.17013	0.0066847	0.054658	0.061726	0.10206	0.12513	0.079851	0.046464	0.0815	0.04892	0.028229	0.0015947	0.02306	0.067132	0.10639	0.10984	0.11074	0.099511	0.063596	0.034268	0.020373	1
0.23928	0.10489	0.039696	0.074528	0.1266	0.067933	0.10979	0.26441	0.26546	0.12476	0.12227	0.069268	0.1142	0.15222	0.17574	0.20538	0.19455	0.1376	0.13043	0.1289	0.008612	0.028403	0.071799	0.096246	0.16678	0.12598	0.12107	0.070506	0.020826	0.0038298	0.013943	0.062787	0.067345	0.071273	0.076599	0.11984	0.079893	0.11001	0.08181	0.029335	1
0.092835	0.043418	0.10819	0.13646	0.075328	0.11047	0.27279	0.22266	0.10307	0.093025	0.13907	0.12649	0.066684	0.064547	0.10377	0.12986	0.16128	0.19206	0.13456	0.14885	0.0020685	0.034606	0.048478	0.098494	0.12372	0.16182	0.09073	0.049689	0.024763	0.0021871	0.0097029	0.03636	0.052621	0.060573	0.078375	0.12043	0.081825	0.1028	0.067108	0.023681	1
0.04349	0.09438	0.14532	0.075872	0.10624	0.25905	0.25916	0.10822	0.088486	0.091612	0.12921	0.11874	0.064036	0.066276	0.10437	0.1173	0.14179	0.19341	0.15047	0.16096	0.003548	0.023698	0.044708	0.073169	0.13509	0.14107	0.127	0.046144	0.026571	0.002064	0.0081392	0.042494	0.042477	0.053618	0.10305	0.10509	0.097573	0.0962	0.050917	0.025952	1
0.042079	0.10633	0.13985	0.08516	0.11639	0.26003	0.21978	0.091904	0.078114	0.079602	0.11189	0.13241	0.092561	0.053608	0.086995	0.11281	0.12504	0.19071	0.16974	0.1329	0.0023079	0.01953	0.052524	0.066884	0.13304	0.1235	0.12388	0.047265	0.029042	0.0031423	0.0058055	0.039388	0.050591	0.055069	0.096704	0.11553	0.088367	0.092642	0.04063	0.019508	1
0.25652	0.1048	0.044908	0.10313	0.14169	0.076379	0.10747	0.26338	0.23737	0.10429	0.15827	0.13338	0.078566	0.10188	0.14888	0.15769	0.19803	0.19946	0.1464	0.13384	0.013387	0.03611	0.059617	0.10613	0.12993	0.15533	0.083021	0.094997	0.040065	0.010229	0.016101	0.041059	0.087759	0.095315	0.089377	0.11027	0.095065	0.090487	0.081425	0.022697	1
0.10966	0.12125	0.085212	0.073022	0.15301	0.13134	0.04857	0.03566	0.084742	0.10454	0.054438	0.051152	0.076632	0.092127	0.082641	0.098485	0.13804	0.10541	0.10332	0.1467	0.004384	0.015607	0.035	0.055527	0.069752	0.093542	0.071058	0.065895	0.040692	0.024308	0.011235	0.015581	0.041168	0.055598	0.08684	0.0714	0.083607	0.080864	0.025018	0.0044619	1
0.044005	0.078172	0.1275	0.11993	0.071712	0.091345	0.19889	0.072865	0.034339	0.051822	0.062135	0.061931	0.07268	0.077064	0.0859	0.10447	0.092031	0.094786	0.15242	0.090916	0.0022728	0.011179	0.026766	0.059619	0.09825	0.077779	0.080744	0.049284	0.029354	0.0099212	0.0076973	0.019291	0.026345	0.064337	0.076638	0.088805	0.057333	0.080122	0.01951	0.0044646	1
0.089094	0.13618	0.096562	0.065769	0.1128	0.18955	0.059654	0.036594	0.06602	0.11914	0.063524	0.057954	0.087082	0.082317	0.085859	0.12999	0.11794	0.090164	0.13805	0.10947	0.005102	0.019201	0.032173	0.062595	0.081001	0.090674	0.072724	0.06295	0.038165	0.015244	0.014045	0.014138	0.04149	0.054134	0.090959	0.072539	0.083598	0.079856	0.01974	0.0062941	1
0.11241	0.1202	0.079958	0.072887	0.15949	0.13534	0.048671	0.034818	0.083481	0.10472	0.056034	0.051566	0.082386	0.092351	0.083169	0.10333	0.13099	0.10247	0.11046	0.14199	0.0043485	0.017164	0.034375	0.056318	0.071272	0.094512	0.070244	0.065611	0.040605	0.023786	0.01201	0.015657	0.042158	0.054194	0.088214	0.072709	0.085765	0.0803	0.02293	0.0045292	1
0.12922	0.10495	0.067682	0.09409	0.18682	0.062769	0.03606	0.053783	0.11219	0.073453	0.050296	0.045907	0.082046	0.087928	0.093358	0.1208	0.12826	0.090381	0.10465	0.12113	0.0040186	0.015421	0.036806	0.052898	0.063412	0.08547	0.070028	0.074644	0.038837	0.017717	0.0097324	0.013969	0.052893	0.051243	0.083147	0.068201	0.097482	0.070531	0.01162	0.0031983	1
0.078369	0.086772	0.10575	0.083926	0.095552	0.17872	0.15338	0.052525	0.059182	0.074168	0.10857	0.14318	0.090001	0.094292	0.10062	0.095536	0.10726	0.077303	0.072776	0.070753	0.0082107	0.026444	0.043308	0.086197	0.10263	0.096012	0.057561	0.020971	0.021028	0.021638	0.0062187	0.031541	0.037793	0.11142	0.09443	0.058212	0.065538	0.05563	0.013501	0.0037049	1
0.07089	0.089779	0.074223	0.1115	0.084795	0.085597	0.14432	0.17963	0.079504	0.051321	0.094006	0.15316	0.089585	0.074131	0.10299	0.090561	0.10374	0.089155	0.085971	0.084816	0.0027598	0.033071	0.050053	0.08989	0.1143	0.07971	0.033652	0.012244	0.05059	0.014684	0.007549	0.022204	0.037469	0.054779	0.14471	0.08627	0.040347	0.061134	0.028821	0.0025542	1
0.090018	0.064327	0.11157	0.090542	0.082939	0.11757	0.18227	0.10199	0.043983	0.060746	0.063829	0.13676	0.10889	0.068715	0.10074	0.096747	0.10376	0.098012	0.087876	0.083371	0.0020321	0.018882	0.042736	0.090679	0.099893	0.093576	0.054559	0.018063	0.024527	0.027954	0.0039515	0.027053	0.035441	0.069215	0.1359	0.067969	0.042924	0.062948	0.024316	0.0035315	1
0.088034	0.078372	0.1128	0.076271	0.07657	0.11634	0.17239	0.080047	0.043241	0.059926	0.13095	0.076033	0.089503	0.096942	0.09659	0.10887	0.083835	0.085899	0.073681	0.05455	0.002967	0.019239	0.056305	0.087467	0.10074	0.065665	0.034365	0.020772	0.054321	0.0089067	0.0082636	0.022061	0.03899	0.11361	0.082005	0.057559	0.068653	0.045443	0.010899	0.0018308	1
0.096665	0.079925	0.10733	0.07672	0.086555	0.15352	0.18086	0.078186	0.049571	0.067887	0.13752	0.1198	0.073382	0.10025	0.098742	0.10593	0.10203	0.086558	0.082116	0.06589	0.0055218	0.025492	0.048552	0.0949	0.11143	0.077061	0.044799	0.013437	0.04027	0.020122	0.0084752	0.027472	0.035262	0.11537	0.098891	0.058659	0.066849	0.055242	0.01312	0.0027352	1
0.061363	0.07657	0.063509	0.13323	0.11427	0.10558	0.13333	0.14725	0.083808	0.043487	0.1316	0.078744	0.070903	0.065221	0.1409	0.12765	0.068207	0.093156	0.094555	0.089737	0.0076229	0.022744	0.041275	0.067516	0.096393	0.11153	0.082176	0.041007	0.0081134	0.0035592	0.0056912	0.042137	0.042745	0.071338	0.05994	0.076075	0.10637	0.039342	0.020749	0.015705	1
0.075936	0.064091	0.11071	0.14357	0.10304	0.12967	0.15236	0.10187	0.042622	0.048116	0.13193	0.078879	0.065362	0.05705	0.136	0.12366	0.067514	0.097748	0.099808	0.10305	0.0033993	0.021124	0.02942	0.067149	0.088403	0.11582	0.090356	0.047064	0.014619	0.0014023	0.012158	0.042124	0.04415	0.071632	0.051009	0.1052	0.083391	0.029582	0.025035	0.016687	1
0.060113	0.098391	0.088156	0.14041	0.11022	0.10547	0.1352	0.14948	0.082006	0.021636	0.11797	0.1355	0.080946	0.074529	0.054931	0.1265	0.13614	0.070698	0.08688	0.099866	0.003515	0.037158	0.027642	0.075904	0.091751	0.09999	0.08655	0.057997	0.01412	0.0018728	0.0044814	0.045306	0.059689	0.056241	0.090961	0.050319	0.1056	0.058337	0.01918	0.0032699	1
0.11102	0.068762	0.066519	0.097711	0.092715	0.16143	0.10525	0.11989	0.15275	0.12976	0.11608	0.12935	0.088836	0.085594	0.076679	0.15477	0.1446	0.089315	0.11738	0.099038	0.020484	0.024213	0.063841	0.09169	0.099926	0.093133	0.084691	0.039958	0.024281	0.011429	0.0036288	0.022202	0.067356	0.076802	0.098247	0.073017	0.048223	0.10946	0.042343	0.010179	1
0.076044	0.060401	0.075508	0.070177	0.15491	0.10835	0.11754	0.15157	0.13081	0.054794	0.13628	0.080141	0.076734	0.068895	0.15173	0.14012	0.07124	0.096594	0.095677	0.07916	0.013799	0.023744	0.053533	0.071941	0.10411	0.10507	0.075376	0.039447	0.010252	0.0050185	0.0028765	0.034395	0.058691	0.06468	0.076414	0.054312	0.11393	0.058962	0.021166	0.01246	1
0.070057	0.058132	0.07282	0.080922	0.069464	0.084612	0.086724	0.13022	0.1854	0.063403	0.12982	0.1044	0.13372	0.1024	0.086787	0.070335	0.067405	0.065285	0.057196	0.07169	0.0073866	0.082037	0.064295	0.058052	0.067271	0.056868	0.045118	0.039362	0.0206	0.0079083	0.0058762	0.028642	0.030529	0.043892	0.098399	0.11703	0.07639	0.024012	0.016101	0.004133	1
0.13746	0.083148	0.067488	0.068442	0.075126	0.063124	0.086392	0.098323	0.12323	0.16314	0.097595	0.14113	0.10849	0.1049	0.082936	0.077303	0.085479	0.060444	0.084285	0.12439	0.030055	0.060428	0.043366	0.057052	0.061047	0.074493	0.061702	0.04614	0.034079	0.019628	0.012178	0.032037	0.033708	0.046301	0.083848	0.12613	0.080506	0.029584	0.026239	0.012933	1
0.12684	0.074086	0.065257	0.067447	0.07733	0.062217	0.085366	0.092353	0.13209	0.15168	0.09948	0.13896	0.1102	0.1095	0.08013	0.071452	0.081995	0.060027	0.078533	0.10798	0.026319	0.064003	0.043403	0.057145	0.061512	0.069257	0.058516	0.044651	0.028944	0.0162	0.011757	0.032926	0.032842	0.041792	0.083174	0.11836	0.081498	0.028653	0.023399	0.010455	1
0.076981	0.074173	0.065284	0.078976	0.073786	0.090085	0.11344	0.13817	0.13719	0.051744	0.10694	0.13369	0.10063	0.082464	0.065213	0.065869	0.066853	0.058723	0.07801	0.13198	0.0075655	0.068515	0.048477	0.049633	0.066445	0.063147	0.057181	0.043652	0.025254	0.015059	0.0092514	0.01463	0.028229	0.053387	0.12176	0.10691	0.042034	0.032319	0.026523	0.012185	1
0.074388	0.055764	0.07194	0.081359	0.084862	0.084455	0.086139	0.11735	0.20797	0.084487	0.15359	0.1007	0.13256	0.11472	0.1052	0.078213	0.068779	0.069805	0.060183	0.063703	0.011003	0.081153	0.076558	0.066136	0.066258	0.058026	0.045742	0.038369	0.021191	0.0082833	0.0047709	0.024985	0.051006	0.043726	0.096366	0.1117	0.091116	0.03155	0.013799	0.0026873	1
0.098077	0.10541	0.096127	0.076416	0.06899	0.078673	0.072062	0.053243	0.071435	0.079228	0.064156	0.065488	0.11905	0.18156	0.085041	0.042817	0.04337	0.037582	0.057488	0.099001	0.012685	0.018802	0.038374	0.048613	0.0944	0.079837	0.032838	0.016752	0.033149	0.026352	0.0025372	0.038688	0.04874	0.042012	0.082758	0.10113	0.041851	0.023029	0.0094625	0.007546	1
0.06302	0.11104	0.10773	0.086806	0.089906	0.079784	0.085516	0.071972	0.05541	0.085269	0.055534	0.087247	0.18309	0.1097	0.052459	0.0465	0.043727	0.044281	0.091801	0.11948	0.0071559	0.025936	0.039604	0.069341	0.08869	0.052953	0.028128	0.041821	0.055873	0.0075217	0.0024201	0.032581	0.052603	0.043961	0.08221	0.098742	0.04994	0.03171	0.012982	0.011331	1
0.067006	0.076469	0.10128	0.10008	0.075312	0.068334	0.07293	0.072624	0.054222	0.062046	0.046228	0.049321	0.057071	0.15467	0.15464	0.074271	0.051485	0.05575	0.035919	0.074184	0.0028801	0.0097742	0.03347	0.062254	0.099673	0.064362	0.031452	0.024033	0.037965	0.0092166	0.0026088	0.016413	0.05595	0.061434	0.050565	0.08196	0.067693	0.022943	0.010943	0.0040574	1
0.11337	0.10904	0.089641	0.092702	0.082933	0.088292	0.071608	0.05574	0.082979	0.073023	0.066503	0.099553	0.18742	0.10027	0.044785	0.040751	0.038363	0.048389	0.095758	0.13305	0.0090589	0.02583	0.040197	0.050772	0.099179	0.072585	0.027764	0.031851	0.054453	0.019123	0.0081507	0.044707	0.037531	0.050956	0.10362	0.07776	0.052325	0.025015	0.014818	0.015017	1
0.096471	0.10012	0.084177	0.075405	0.066856	0.07687	0.071071	0.052289	0.080995	0.080604	0.06719	0.07075	0.083654	0.1817	0.12301	0.051657	0.042132	0.040786	0.036484	0.087128	0.014549	0.020712	0.036501	0.047779	0.084932	0.087256	0.042528	0.012725	0.017766	0.027374	0.0047116	0.037702	0.046542	0.039781	0.082403	0.10158	0.04227	0.022307	0.0097721	0.0062675	1
0.093802	0.067075	0.10997	0.088955	0.093554	0.1268	0.12147	0.070098	0.045046	0.040139	0.080479	0.079739	0.032013	0.05934	0.15825	0.14149	0.070119	0.064778	0.072092	0.097307	0.0033821	0.013615	0.034218	0.04952	0.09392	0.081807	0.063146	0.037914	0.0406	0.009634	0.014774	0.017023	0.032336	0.053962	0.10874	0.088776	0.050372	0.036584	0.021244	0.0039244	1
0.090955	0.064809	0.1202	0.080748	0.1089	0.12858	0.11624	0.062268	0.042849	0.041516	0.078919	0.077419	0.033496	0.058175	0.16241	0.14773	0.071725	0.063954	0.069041	0.092869	0.0032851	0.012613	0.035004	0.047804	0.094838	0.084634	0.069591	0.033906	0.038776	0.0098288	0.013073	0.016258	0.034177	0.057604	0.11417	0.083166	0.048277	0.037421	0.019669	0.0039302	1
0.064053	0.10437	0.092328	0.088213	0.1258	0.12623	0.079963	0.047709	0.036729	0.037504	0.068144	0.070135	0.02688	0.041529	0.14668	0.15076	0.074949	0.067845	0.063715	0.093767	0.0052245	0.007666	0.027933	0.046258	0.074773	0.082396	0.06589	0.03645	0.03292	0.019856	0.0038882	0.010722	0.031699	0.075062	0.10776	0.07457	0.043619	0.03341	0.01647	0.0026085	1
0.099112	0.10821	0.069897	0.06518	0.093563	0.07017	0.12691	0.12688	0.095677	0.051061	0.069043	0.10189	0.090135	0.0393	0.068278	0.17417	0.15653	0.073748	0.05815	0.081519	0.0025591	0.026391	0.044692	0.049575	0.09616	0.09676	0.056119	0.039769	0.026696	0.012035	0.011642	0.02951	0.031284	0.060595	0.0666	0.10619	0.080697	0.038151	0.021316	0.0081841	1
0.094077	0.1116	0.072031	0.057814	0.094256	0.070446	0.1284	0.13157	0.10374	0.051973	0.074501	0.092422	0.10665	0.045397	0.058084	0.14295	0.18281	0.083592	0.057361	0.075992	0.002414	0.027075	0.046954	0.049738	0.097772	0.098612	0.05755	0.036253	0.026318	0.012504	0.011775	0.027867	0.032895	0.061114	0.064235	0.10192	0.087499	0.039897	0.022772	0.0080217	1
0.08495	0.085116	0.060197	0.061197	0.050765	0.055196	0.06343	0.073468	0.072645	0.059918	0.06925	0.059479	0.089116	0.065544	0.047363	0.041256	0.067438	0.11671	0.060337	0.05234	0.0062272	0.020274	0.028959	0.035622	0.05906	0.0751	0.053855	0.025831	0.019136	0.011414	0.0084911	0.028375	0.031246	0.048794	0.051758	0.056118	0.046251	0.03539	0.025242	0.0041214	1
0.08829	0.060177	0.062498	0.053366	0.055588	0.061749	0.072008	0.076646	0.07018	0.068556	0.065982	0.059157	0.070447	0.066227	0.054428	0.046709	0.067389	0.12431	0.066432	0.0494	0.0066291	0.021598	0.030135	0.045792	0.05382	0.062288	0.059231	0.029959	0.018774	0.0083436	0.0064881	0.021454	0.034392	0.044009	0.052703	0.054977	0.049582	0.039566	0.027442	0.0045289	1
0.093196	0.063933	0.063045	0.05162	0.04893	0.05736	0.067344	0.074914	0.065709	0.065353	0.063768	0.062191	0.071383	0.055069	0.047099	0.062552	0.11698	0.085447	0.052749	0.037616	0.0059631	0.020374	0.028984	0.042958	0.05846	0.063484	0.048923	0.027482	0.017502	0.011608	0.0074872	0.023563	0.032142	0.040756	0.058725	0.057258	0.046144	0.03942	0.019926	0.0029729	1
0.082906	0.072283	0.057489	0.045074	0.049243	0.056761	0.062303	0.062865	0.057139	0.082592	0.044988	0.067455	0.054036	0.046704	0.060343	0.10874	0.11389	0.052096	0.045152	0.045186	0.0049584	0.014012	0.028367	0.04773	0.063268	0.059649	0.039122	0.026135	0.017933	0.013138	0.0075764	0.021345	0.029233	0.034666	0.055239	0.061052	0.047425	0.036782	0.013583	0.0083895	1
0.072092	0.083516	0.079889	0.059042	0.061686	0.054526	0.061378	0.064394	0.073222	0.074282	0.061312	0.064541	0.06867	0.090553	0.047999	0.037671	0.060497	0.11162	0.087845	0.054534	0.0043313	0.022835	0.032042	0.035403	0.059949	0.079995	0.050249	0.02561	0.025737	0.0095938	0.0033018	0.024375	0.040693	0.047358	0.057656	0.051499	0.044656	0.036763	0.030081	0.007882	1
0.085711	0.056947	0.068359	0.086738	0.08183	0.094776	0.087741	0.063503	0.057125	0.06699	0.064348	0.087863	0.094159	0.046477	0.064146	0.057416	0.077662	0.070184	0.077057	0.10868	0.0025193	0.018333	0.049651	0.03622	0.050872	0.075051	0.064554	0.050575	0.021811	0.0043769	0.0030411	0.022935	0.038674	0.067263	0.067393	0.039045	0.050915	0.041132	0.025694	0.017111	1
0.049952	0.07244	0.092794	0.08929	0.09744	0.075131	0.059336	0.053491	0.067838	0.067427	0.070752	0.069214	0.099978	0.063417	0.05206	0.05524	0.059755	0.071788	0.06086	0.11589	0.0025416	0.0098395	0.046229	0.062696	0.042564	0.066255	0.05852	0.046616	0.02227	0.0041045	0.0020973	0.032957	0.035309	0.061557	0.049838	0.05019	0.053174	0.037368	0.021652	0.017132	1
0.059814	0.069816	0.083799	0.082659	0.1055	0.085267	0.066715	0.059332	0.069879	0.072742	0.069882	0.098457	0.06212	0.05257	0.058116	0.058863	0.070404	0.061213	0.11422	0.10966	0.0028922	0.014074	0.057157	0.034281	0.053232	0.070046	0.063391	0.05685	0.017855	0.006091	0.0073273	0.019685	0.044694	0.060824	0.036779	0.059119	0.06238	0.039643	0.032259	0.010911	1
0.052741	0.090889	0.093062	0.082989	0.097971	0.068722	0.050411	0.051851	0.062139	0.064761	0.080868	0.069722	0.090143	0.078148	0.054236	0.067099	0.052495	0.068914	0.05447	0.09371	0.0019415	0.009384	0.03709	0.076838	0.052144	0.052507	0.052332	0.046792	0.023767	0.0034317	0.0031247	0.0373	0.04297	0.060002	0.045436	0.048488	0.050473	0.036829	0.019897	0.010751	1
0.054242	0.073787	0.087342	0.084214	0.10478	0.077684	0.062387	0.058475	0.072987	0.070358	0.066934	0.091695	0.079334	0.05034	0.059423	0.051707	0.069485	0.055873	0.093754	0.12314	0.0025448	0.010703	0.052964	0.041038	0.049145	0.073052	0.063495	0.05584	0.018586	0.0042238	0.0058478	0.024575	0.044192	0.059901	0.03661	0.055821	0.061204	0.039531	0.030774	0.014221	1
0.091119	0.075385	0.058191	0.045037	0.063108	0.082104	0.091897	0.10427	0.11344	0.09279	0.15307	0.14304	0.056232	0.044421	0.044714	0.051632	0.061265	0.10242	0.088866	0.067669	0.022641	0.032382	0.061409	0.055817	0.075966	0.060854	0.032055	0.019611	0.025	0.021776	0.010649	0.025605	0.021507	0.062159	0.092338	0.10124	0.020637	0.023698	0.045703	0.0059767	1
0.093889	0.064462	0.047504	0.047418	0.066522	0.076471	0.096644	0.11488	0.09826	0.080845	0.19736	0.071942	0.0477	0.045987	0.049271	0.064713	0.082977	0.10065	0.06731	0.05561	0.020316	0.030058	0.05921	0.059079	0.071477	0.055575	0.032407	0.018982	0.022705	0.019583	0.010887	0.017778	0.035387	0.061519	0.10518	0.059878	0.01711	0.0389	0.039711	0.003192	1
0.07152	0.045608	0.05588	0.077368	0.090399	0.097704	0.10766	0.10401	0.098834	0.078978	0.048524	0.16213	0.12405	0.05733	0.046122	0.0565	0.066712	0.069321	0.11903	0.07358	0.0054857	0.034196	0.038584	0.074652	0.07806	0.083216	0.050368	0.025909	0.015528	0.0063385	0.0080897	0.019366	0.034015	0.061929	0.10037	0.067911	0.018713	0.042799	0.046863	0.013636	1
0.080238	0.070777	0.04492	0.058787	0.078437	0.086487	0.097388	0.11215	0.098602	0.099057	0.10583	0.19331	0.069499	0.052297	0.047841	0.051156	0.06538	0.086268	0.10117	0.061717	0.016415	0.034868	0.049357	0.070363	0.082731	0.070808	0.039249	0.022976	0.013868	0.015082	0.011828	0.024871	0.028357	0.061685	0.096408	0.082882	0.018986	0.033808	0.046302	0.010235	1
0.093108	0.056967	0.04128	0.051183	0.068237	0.068537	0.096402	0.10791	0.077522	0.068497	0.16205	0.056973	0.044657	0.046651	0.053961	0.063505	0.093512	0.094904	0.058445	0.049506	0.0099981	0.024073	0.055846	0.061038	0.071493	0.053959	0.032864	0.018471	0.020168	0.017718	0.013327	0.013516	0.038141	0.055855	0.095783	0.04486	0.018818	0.048225	0.036886	0.0025777	1
0.079281	0.074168	0.099158	0.10909	0.11968	0.10723	0.076208	0.079228	0.077485	0.073628	0.066024	0.12154	0.13003	0.08104	0.073983	0.10037	0.085885	0.061422	0.034619	0.1377	0.0046075	0.025939	0.03246	0.077659	0.076915	0.072748	0.071502	0.060977	0.019327	0.0027512	0.0032042	0.031022	0.060073	0.093265	0.047878	0.053936	0.052647	0.064957	0.03644	0.0011455	1
0.07397	0.096671	0.10694	0.11953	0.11172	0.076602	0.078941	0.077704	0.074141	0.14707	0.090311	0.12818	0.14507	0.099774	0.06445	0.097709	0.1026	0.072227	0.034877	0.1297	0.015896	0.036826	0.047651	0.075716	0.085938	0.078287	0.058951	0.056488	0.026778	0.0046717	0.010952	0.032483	0.061894	0.073359	0.05733	0.06547	0.071227	0.087478	0.021979	0.0014591	1
0.079571	0.095056	0.084849	0.096138	0.08574	0.096016	0.087063	0.059962	0.076904	0.083048	0.091177	0.064036	0.12143	0.1133	0.067281	0.11229	0.11397	0.061901	0.04296	0.04935	0.0068794	0.020832	0.036894	0.075732	0.088285	0.07119	0.052463	0.058651	0.0073751	0.0015129	0.0087031	0.019297	0.049776	0.094565	0.096013	0.04859	0.039127	0.023651	0.033067	0.011831	1
0.098806	0.086962	0.097663	0.081297	0.099787	0.067893	0.056353	0.079576	0.085874	0.095144	0.089434	0.072493	0.12115	0.13522	0.086161	0.073003	0.099703	0.091937	0.0665	0.029457	0.0096279	0.023174	0.035001	0.060895	0.098628	0.084947	0.06094	0.040077	0.015213	0.0015487	0.015433	0.025159	0.046794	0.094105	0.075884	0.057521	0.041075	0.023397	0.045144	0.0038683	1
0.10055	0.090799	0.093337	0.10129	0.082525	0.097344	0.056945	0.061113	0.081921	0.08219	0.081778	0.076559	0.10322	0.13097	0.087002	0.085139	0.11785	0.079011	0.061508	0.031724	0.007995	0.019212	0.032063	0.064755	0.096324	0.081696	0.051214	0.046342	0.019866	0.0012284	0.013046	0.021231	0.045305	0.090929	0.097144	0.052514	0.042516	0.019642	0.029614	0.011751	1
0.071553	0.095694	0.10682	0.072044	0.093164	0.065361	0.11114	0.10193	0.085865	0.06756	0.058251	0.055062	0.05973	0.083036	0.14036	0.10893	0.096903	0.12595	0.072074	0.075585	0.0031288	0.028861	0.033546	0.040558	0.060981	0.096502	0.10965	0.037476	0.017932	0.004856	0.0053072	0.017174	0.041627	0.059561	0.073541	0.086096	0.060075	0.051493	0.035673	0.0049121	1
0.07514	0.088651	0.11149	0.071002	0.093271	0.065367	0.10633	0.098756	0.086242	0.068124	0.053349	0.060665	0.055525	0.085516	0.14167	0.10581	0.09766	0.12106	0.069046	0.074457	0.0046582	0.026671	0.029996	0.042765	0.063154	0.099932	0.10706	0.033502	0.018522	0.0054301	0.006669	0.017056	0.040765	0.058477	0.074782	0.087232	0.057959	0.050147	0.035649	0.0048295	1
0.073643	0.088481	0.11156	0.070403	0.092631	0.062836	0.1087	0.10449	0.094095	0.069074	0.057474	0.049403	0.063681	0.071233	0.13244	0.12366	0.098823	0.12234	0.084869	0.083496	0.0035434	0.030759	0.03134	0.039075	0.05911	0.097729	0.1108	0.040042	0.019468	0.0047559	0.0057072	0.0132	0.040999	0.058681	0.077987	0.081839	0.063642	0.050357	0.038848	0.0073545	1
0.087274	0.11167	0.070987	0.094343	0.06593	0.10895	0.10541	0.092269	0.070094	0.07008	0.050769	0.049325	0.060296	0.080281	0.13934	0.11501	0.10123	0.12903	0.080463	0.07717	0.0013272	0.023186	0.042271	0.041903	0.05928	0.079628	0.10301	0.069089	0.01752	0.0035751	0.001533	0.021445	0.041652	0.063676	0.07128	0.083264	0.061227	0.054115	0.034187	0.0041161	1
0.095914	0.073829	0.10971	0.083084	0.084565	0.082984	0.069063	0.10043	0.090897	0.079784	0.064065	0.064563	0.05184	0.066121	0.062899	0.11755	0.12766	0.099474	0.12857	0.096051	0.012158	0.033097	0.027483	0.027975	0.05779	0.084669	0.092224	0.060159	0.027435	0.012825	0.0075901	0.015503	0.021788	0.049982	0.09431	0.081202	0.080767	0.048319	0.029438	0.0070682	1
0.087008	0.090948	0.084972	0.077443	0.048877	0.07625	0.096634	0.083641	0.099129	0.075253	0.09522	0.080706	0.12149	0.073831	0.080923	0.061152	0.050827	0.085996	0.099394	0.071308	0.014551	0.043308	0.032625	0.036546	0.072375	0.076481	0.066913	0.034984	0.024768	0.0095667	0.0019463	0.031098	0.044544	0.058068	0.076187	0.08867	0.040969	0.031294	0.028481	0.008781	1
0.079306	0.098752	0.10308	0.078621	0.066211	0.059143	0.10977	0.10884	0.083232	0.10953	0.12809	0.095788	0.073806	0.093708	0.09469	0.09331	0.085048	0.04993	0.082837	0.10051	0.01575	0.04877	0.051	0.036398	0.084306	0.065283	0.064261	0.051395	0.021255	0.01189	0.010382	0.018866	0.041589	0.075569	0.084685	0.080583	0.070761	0.029693	0.022805	0.014658	1
0.087327	0.11042	0.090118	0.079388	0.051405	0.0713	0.11632	0.094566	0.096758	0.095523	0.12285	0.091804	0.079545	0.11644	0.07948	0.093222	0.063404	0.052597	0.092949	0.098702	0.016627	0.051096	0.048866	0.033737	0.074934	0.066123	0.066479	0.048735	0.021535	0.015257	0.0083718	0.017241	0.049845	0.071335	0.084426	0.08996	0.066401	0.018353	0.032927	0.0064315	1
0.060611	0.064168	0.088728	0.092922	0.084269	0.084249	0.047674	0.069085	0.099926	0.085186	0.066877	0.050868	0.087339	0.082479	0.10721	0.097141	0.063569	0.075495	0.085372	0.062089	0.015411	0.024449	0.031812	0.051778	0.066143	0.070607	0.05341	0.046987	0.022676	0.0041717	0.00097628	0.0048368	0.044381	0.072452	0.07101	0.066535	0.062843	0.034164	0.019711	0.010583	1
0.088074	0.090141	0.085355	0.072562	0.051344	0.080475	0.09506	0.087147	0.098792	0.074435	0.09108	0.083399	0.1202	0.071909	0.082884	0.053287	0.059703	0.095829	0.092076	0.070689	0.012116	0.040599	0.031726	0.039788	0.075927	0.081351	0.068852	0.032132	0.023329	0.007791	0.0033904	0.034641	0.043697	0.057958	0.073877	0.086091	0.035302	0.036933	0.031262	0.010817	1
0.067565	0.10032	0.094027	0.091745	0.12503	0.14263	0.10084	0.058061	0.049572	0.035363	0.042132	0.096993	0.14263	0.13558	0.082504	0.042751	0.03722	0.039564	0.096922	0.12987	0.0041141	0.022097	0.034634	0.03123	0.088408	0.10237	0.071623	0.037103	0.024802	0.010841	0.0069218	0.047405	0.034607	0.045031	0.083405	0.086596	0.06492	0.040154	0.016167	0.0016458	1
0.069811	0.051271	0.0779	0.10757	0.097312	0.096726	0.12607	0.14385	0.10025	0.057371	0.040953	0.087827	0.17568	0.17019	0.071548	0.038439	0.038042	0.047189	0.10487	0.14161	0.0040813	0.027312	0.029278	0.085301	0.10169	0.091629	0.062966	0.032745	0.020906	0.0033243	0.0017727	0.034017	0.070612	0.036267	0.054735	0.084752	0.065934	0.064671	0.035543	0.011237	1
0.063089	0.058443	0.08478	0.088329	0.069973	0.09705	0.13592	0.0956	0.053708	0.053984	0.034118	0.04458	0.096818	0.16934	0.15757	0.074588	0.040165	0.038327	0.042724	0.1028	0.0018128	0.020855	0.032761	0.041839	0.09746	0.096798	0.067666	0.028726	0.0085994	0.002505	0.0018032	0.018751	0.073098	0.042999	0.045619	0.079045	0.070504	0.038867	0.028215	0.0029697	1
0.070153	0.11401	0.10663	0.097763	0.12068	0.13941	0.12047	0.070077	0.052159	0.042046	0.077432	0.13405	0.15178	0.09941	0.04669	0.035963	0.03496	0.070061	0.11667	0.14831	0.0096817	0.02801	0.028062	0.044436	0.097623	0.094522	0.070672	0.036447	0.036006	0.017502	0.012832	0.046316	0.030994	0.053906	0.09678	0.087985	0.073528	0.039337	0.021008	0.0032315	1
0.067745	0.059943	0.10023	0.11706	0.093471	0.097387	0.14338	0.14542	0.082898	0.058677	0.070825	0.14475	0.17942	0.10192	0.046783	0.03651	0.033306	0.07819	0.12106	0.14677	0.011494	0.02993	0.030904	0.083695	0.098744	0.10008	0.055878	0.036419	0.030507	0.0052474	0.0027521	0.056653	0.046368	0.033832	0.068151	0.10306	0.069182	0.059618	0.034046	0.0089271	1
0.052761	0.085923	0.12179	0.083978	0.070637	0.068096	0.06799	0.070048	0.085083	0.1042	0.035396	0.044102	0.064392	0.076339	0.086747	0.061904	0.061763	0.064967	0.15636	0.15464	0.008728	0.017565	0.032824	0.041309	0.043862	0.057897	0.088047	0.076678	0.028143	0.008776	0.0022077	0.0090349	0.02347	0.04077	0.095079	0.069624	0.042825	0.05403	0.049978	0.016481	1
0.048084	0.084409	0.11794	0.07165	0.047193	0.043429	0.04803	0.051743	0.076625	0.10662	0.046405	0.03694	0.044558	0.062057	0.072806	0.089354	0.065265	0.064139	0.065172	0.14622	0.01162	0.021491	0.024749	0.044082	0.04395	0.041484	0.045516	0.063933	0.039156	0.011606	0.0019381	0.0064245	0.019742	0.038	0.070125	0.098088	0.03773	0.029107	0.029043	0.018019	1
0.095449	0.12032	0.080411	0.071274	0.073271	0.069748	0.068715	0.086511	0.10579	0.090221	0.042888	0.043793	0.066877	0.085284	0.096731	0.068515	0.072542	0.083133	0.18482	0.12098	0.0044706	0.019936	0.041513	0.048763	0.049469	0.057967	0.071406	0.085826	0.042018	0.0095323	0.0016256	0.011285	0.032282	0.071381	0.081327	0.045053	0.063632	0.075812	0.033503	0.013659	1
0.089231	0.12268	0.077174	0.052449	0.04918	0.046014	0.0521	0.075838	0.1085	0.083798	0.048311	0.04276	0.044864	0.061378	0.076042	0.10233	0.078567	0.070949	0.068674	0.16045	0.007883	0.021617	0.033788	0.050628	0.048758	0.045697	0.037985	0.058306	0.05385	0.019884	0.0018343	0.007226	0.022053	0.045286	0.10151	0.062211	0.036845	0.054489	0.036261	0.0093928	1
0.043833	0.073363	0.12499	0.083252	0.053972	0.047554	0.044714	0.049675	0.066801	0.10365	0.044541	0.035253	0.046231	0.063846	0.07313	0.084158	0.061897	0.061755	0.064666	0.15229	0.011424	0.021631	0.022636	0.040745	0.04301	0.040913	0.052526	0.066373	0.036493	0.010792	0.0021543	0.0074546	0.018716	0.036279	0.067298	0.10138	0.040325	0.028088	0.026901	0.017936	1
0.010718	0.0088361	0.011335	0.011204	0.0075364	0.01141	0.022327	0.018771	0.0094582	0.012951	0.007459	0.010137	0.01179	0.021107	0.022743	0.016732	0.0074873	0.0068789	0.011225	0.0093704	0.0009869	0.0021069	0.0055114	0.016342	0.010845	0.010616	0.0055435	0.0061353	0.0030898	0.00013537	0.00062206	0.0035157	0.0071819	0.0063246	0.0073608	0.016342	0.0085198	0.0082302	0.0024785	0.0011234	1
0.011078	0.01024	0.012469	0.0085175	0.0081451	0.0093582	0.025347	0.01152	0.0095005	0.013864	0.0064811	0.01014	0.0092576	0.023783	0.021371	0.012907	0.0075023	0.0075602	0.012894	0.0094103	0.00081229	0.0019338	0.0037741	0.015889	0.011916	0.010875	0.0051476	0.0057937	0.0033525	0.00033423	0.00081615	0.0041475	0.0068132	0.0042545	0.0094379	0.014495	0.0099518	0.0068271	0.0029947	0.001606	1
0.0099867	0.0088242	0.010291	0.007905	0.010057	0.011824	0.02756	0.0081563	0.010066	0.015231	0.0074463	0.0066778	0.010843	0.011524	0.028008	0.020888	0.010135	0.0062202	0.0087084	0.011821	0.001354	0.0021423	0.0040702	0.011239	0.017166	0.010324	0.0068125	0.0047288	0.0028055	0.0008362	0.00033794	0.002474	0.0067065	0.0063711	0.0064844	0.016661	0.0080646	0.0089359	0.0018818	0.001982	1
0.0088439	0.011438	0.0099493	0.0069498	0.0097459	0.019999	0.020516	0.0084245	0.011496	0.015437	0.0067986	0.0099094	0.0090267	0.022599	0.021909	0.013475	0.0063674	0.0072235	0.01389	0.010408	0.00086151	0.0026308	0.0041588	0.013004	0.015624	0.011247	0.0057728	0.0043353	0.0029171	0.00079021	0.00084388	0.0043885	0.0047763	0.0038705	0.013622	0.011366	0.010835	0.0057926	0.0039737	0.0017049	1
0.0092651	0.0093785	0.010429	0.0067336	0.0109	0.013583	0.025505	0.010241	0.013175	0.016614	0.015941	0.0092308	0.0072759	0.010842	0.010971	0.022678	0.023151	0.013716	0.0065474	0.0068602	0.0020401	0.0044353	0.0052374	0.0074813	0.01774	0.010989	0.0099349	0.0022306	0.0024552	0.00037742	0.0012548	0.0019769	0.0061979	0.0086337	0.0082866	0.012868	0.010783	0.0086885	0.0036149	0.0014739	1
0.015285	0.010727	0.013899	0.015844	0.013646	0.017174	0.014419	0.019671	0.03223	0.019196	0.027965	0.013561	0.011524	0.02141	0.014901	0.017123	0.02411	0.014157	0.011999	0.014923	0.0043393	0.010265	0.012782	0.010215	0.011029	0.012815	0.0082274	0.0090776	0.0066577	0.0012645	0.00064772	0.0021676	0.0052794	0.015242	0.01958	0.015565	0.013444	0.0085539	0.0050214	0.0010634	1
0.013285	0.013858	0.01029	0.013004	0.014943	0.013834	0.018123	0.014432	0.020624	0.032351	0.027554	0.012505	0.011953	0.018566	0.013195	0.01592	0.023793	0.01485	0.012247	0.014172	0.0079661	0.0084743	0.01052	0.0085355	0.012009	0.0097941	0.0080933	0.011108	0.0047449	0.0012806	0.00055594	0.001851	0.0047518	0.011448	0.020794	0.015184	0.014546	0.0076097	0.0054711	0.00095514	1
0.015402	0.014906	0.013201	0.012075	0.014331	0.013374	0.017199	0.016551	0.014247	0.023105	0.015162	0.01255	0.014576	0.015468	0.013144	0.022665	0.017901	0.012701	0.013835	0.017416	0.0037327	0.0063677	0.0066727	0.008853	0.011079	0.012192	0.012748	0.0098801	0.0046598	0.0012093	0.0018712	0.0024048	0.0043998	0.010928	0.016082	0.013192	0.014154	0.0072076	0.0059914	0.0012298	1
0.016775	0.011838	0.012894	0.015094	0.016344	0.01777	0.013631	0.018799	0.031044	0.020548	0.028282	0.014035	0.012319	0.021987	0.016855	0.013669	0.024374	0.017147	0.013144	0.012803	0.0043756	0.010412	0.011382	0.011325	0.012331	0.012133	0.0087652	0.0091333	0.0068951	0.0013161	0.00091129	0.0023067	0.0060178	0.013593	0.02166	0.014867	0.015032	0.0075155	0.0048441	0.0010779	1
0.017279	0.011739	0.012261	0.013418	0.013154	0.016959	0.014442	0.017327	0.032316	0.022609	0.029311	0.011697	0.011712	0.019573	0.015093	0.015581	0.025447	0.015538	0.012533	0.014099	0.0057677	0.0097253	0.011381	0.0096561	0.012026	0.011619	0.008544	0.010416	0.0062664	0.00086314	0.00084145	0.0023209	0.0058965	0.012198	0.021054	0.014247	0.014519	0.0083754	0.0050996	0.0013032	1
0.059931	0.04694	0.042239	0.031568	0.022236	0.028176	0.022677	0.058598	0.047042	0.02746	0.037035	0.052196	0.031022	0.032913	0.055149	0.051716	0.039524	0.033215	0.031535	0.026785	0.0031542	0.012217	0.016295	0.035737	0.037316	0.021766	0.019738	0.0232	0.021124	0.0021845	0.0062121	0.014393	0.021984	0.02287	0.037845	0.039795	0.026718	0.014082	0.0092158	0.0019957	1
0.066344	0.050031	0.041872	0.022514	0.029136	0.026984	0.022153	0.062541	0.043282	0.024759	0.031731	0.034976	0.053121	0.032621	0.031378	0.053258	0.055948	0.036745	0.031545	0.032779	0.0016031	0.0079371	0.020672	0.020498	0.053048	0.028671	0.020767	0.012356	0.026856	0.0043825	0.0054889	0.016223	0.022689	0.021962	0.027161	0.04692	0.025288	0.01782	0.0077371	0.0028565	1
0.073481	0.052126	0.041183	0.0224	0.028626	0.025512	0.023822	0.061749	0.042125	0.023044	0.031644	0.032436	0.052903	0.040436	0.02728	0.045778	0.056062	0.043793	0.03236	0.034108	0.0016018	0.0075637	0.018685	0.019534	0.051443	0.032913	0.020194	0.012766	0.02719	0.0064462	0.0056269	0.017637	0.02274	0.025546	0.027002	0.044089	0.026214	0.018178	0.0075912	0.0030415	1
0.070818	0.039072	0.043085	0.021653	0.026284	0.025439	0.028416	0.062189	0.033814	0.020569	0.032814	0.052114	0.035245	0.028299	0.050185	0.052869	0.037763	0.030262	0.03143	0.024886	0.002544	0.0093953	0.018811	0.025802	0.045834	0.019331	0.020541	0.015556	0.026279	0.0028336	0.0075474	0.014287	0.02242	0.023348	0.037048	0.03696	0.024289	0.013756	0.0071503	0.001127	1
0.050462	0.039998	0.039407	0.019977	0.030132	0.020445	0.050266	0.054758	0.027249	0.019944	0.047882	0.047725	0.027036	0.037582	0.05177	0.034778	0.025264	0.030056	0.024942	0.028683	0.0028136	0.010136	0.01939	0.029194	0.045802	0.01793	0.017364	0.011731	0.020523	0.0037663	0.0070729	0.018176	0.011477	0.019046	0.046266	0.030921	0.023149	0.012368	0.0071366	0.0010827	1
0.16859	0.12759	0.057797	0.076804	0.088448	0.07204	0.14657	0.17295	0.075885	0.073229	0.074294	0.12602	0.092723	0.081297	0.11166	0.14669	0.12284	0.11448	0.10909	0.088701	0.012492	0.030413	0.037315	0.07678	0.087702	0.077297	0.098749	0.050063	0.041322	0.015311	0.01092	0.030204	0.0397	0.10326	0.096576	0.062725	0.077182	0.08777	0.019875	0.0021309	1
0.17604	0.11901	0.055807	0.074523	0.09152	0.076686	0.1546	0.17321	0.075427	0.070744	0.092157	0.12746	0.096611	0.081744	0.13398	0.14421	0.11439	0.10863	0.10016	0.077208	0.014666	0.030928	0.038485	0.090143	0.07031	0.089412	0.098931	0.047552	0.038391	0.01194	0.011574	0.025587	0.055645	0.10578	0.097136	0.05614	0.08664	0.076522	0.019324	0.0015256	1
0.13463	0.14142	0.14507	0.094057	0.10201	0.11749	0.072229	0.11975	0.19882	0.084566	0.17589	0.085696	0.093519	0.1309	0.093344	0.086547	0.15189	0.13831	0.11738	0.12104	0.011039	0.046606	0.060167	0.08647	0.10669	0.071244	0.094361	0.055994	0.051839	0.019647	0.0014512	0.039953	0.079646	0.079795	0.13257	0.10872	0.044788	0.043343	0.070363	0.0051484	1
0.16918	0.13809	0.073678	0.059234	0.10094	0.070891	0.12248	0.19848	0.08873	0.077323	0.086429	0.13081	0.08958	0.085074	0.13458	0.15189	0.11884	0.11455	0.11178	0.094025	0.01545	0.034023	0.032803	0.092959	0.075343	0.088539	0.10203	0.051803	0.043826	0.016042	0.0098907	0.028138	0.04718	0.11021	0.10224	0.063417	0.083535	0.087101	0.023648	0.0019202	1
0.16404	0.15707	0.11339	0.049355	0.091796	0.083357	0.077759	0.171	0.1596	0.081871	0.080018	0.14722	0.10262	0.087222	0.1462	0.14905	0.11472	0.11992	0.11199	0.099576	0.011969	0.03786	0.040235	0.097285	0.071029	0.11726	0.08181	0.060374	0.041429	0.017501	0.01235	0.035742	0.044725	0.1056	0.11013	0.073573	0.058461	0.097009	0.033498	0.0031877	1
0.082857	0.070253	0.085732	0.086683	0.098971	0.070762	0.11369	0.16667	0.059727	0.049196	0.054566	0.1201	0.1119	0.084345	0.10459	0.081994	0.095947	0.080086	0.079283	0.075397	0.0012639	0.019356	0.047202	0.083721	0.099097	0.070851	0.040849	0.042049	0.028856	0.010108	0.0088024	0.026372	0.042956	0.036596	0.10689	0.092694	0.049933	0.055535	0.022722	0.0016139	1
0.077044	0.071943	0.096349	0.075157	0.1066	0.077517	0.098521	0.15853	0.068216	0.046115	0.071634	0.05424	0.11863	0.11764	0.082205	0.10946	0.079512	0.091517	0.081621	0.078598	0.0012045	0.0081918	0.039341	0.082102	0.10747	0.093456	0.041305	0.028568	0.037174	0.0036875	0.0085927	0.033462	0.043708	0.042741	0.055311	0.11997	0.053157	0.041386	0.039237	0.0029132	1
0.082523	0.084308	0.068288	0.095914	0.080217	0.10818	0.074647	0.093519	0.16834	0.085536	0.070191	0.086795	0.141	0.099431	0.1166	0.082933	0.078513	0.088333	0.078802	0.094262	0.0034803	0.030808	0.064217	0.087722	0.095257	0.051621	0.046745	0.055961	0.023021	0.010067	0.0081993	0.026161	0.048737	0.054314	0.046284	0.12557	0.077729	0.041751	0.03503	0.0060611	1
0.065926	0.077655	0.071064	0.079747	0.085007	0.096942	0.073645	0.12365	0.16974	0.055503	0.058666	0.11667	0.12935	0.096855	0.10635	0.06654	0.074838	0.079355	0.079158	0.084406	0.0026356	0.031009	0.062207	0.084788	0.091816	0.053213	0.044557	0.049305	0.016667	0.010222	0.006095	0.025431	0.046015	0.04132	0.063068	0.1288	0.056678	0.044509	0.030907	0.0045256	1
0.074446	0.077736	0.08163	0.087906	0.075149	0.10371	0.073745	0.11428	0.15755	0.054686	0.080623	0.058707	0.12354	0.11951	0.10227	0.10266	0.066133	0.080964	0.078493	0.083638	0.0019825	0.018569	0.048703	0.084	0.10565	0.073297	0.042856	0.045101	0.02213	0.0042442	0.012363	0.029332	0.04894	0.050379	0.04089	0.10799	0.078122	0.034999	0.040202	0.0048179	1
0.33476	0.39623	0.42614	0.51782	0.49843	0.40983	0.43318	0.41939	0.47548	0.42404	0.32145	0.49675	0.47719	0.40312	0.42506	0.39278	0.43436	0.52891	0.41725	0.43785	0.020962	0.12971	0.24757	0.31147	0.39108	0.37682	0.29032	0.22631	0.13674	0.04871	0.020147	0.096587	0.22142	0.30237	0.39634	0.40308	0.31189	0.22811	0.125	0.06261	1
0.37422	0.40131	0.52678	0.51522	0.40912	0.43912	0.42317	0.46979	0.41277	0.402	0.33685	0.4441	0.51142	0.40451	0.38116	0.41628	0.46222	0.51163	0.43857	0.44334	0.031504	0.087578	0.21368	0.35221	0.37131	0.41501	0.29651	0.21948	0.15464	0.040805	0.0075921	0.1399	0.20995	0.34384	0.36856	0.38849	0.28862	0.22134	0.15193	0.054092	1
0.40481	0.39255	0.47314	0.51456	0.41183	0.42557	0.4234	0.46395	0.42456	0.4324	0.35691	0.54697	0.41688	0.39006	0.40061	0.45769	0.46713	0.49981	0.41556	0.4216	0.036617	0.10702	0.22487	0.3372	0.38741	0.38452	0.2882	0.21285	0.13995	0.060978	0.012579	0.13759	0.21251	0.34503	0.38139	0.39498	0.28	0.20948	0.15762	0.051666	1
0.4345	0.43227	0.44385	0.47921	0.44398	0.38945	0.42784	0.49676	0.46342	0.44473	0.51915	0.44044	0.38713	0.39925	0.44594	0.45254	0.51614	0.41055	0.43685	0.44474	0.037194	0.10839	0.261	0.29415	0.44136	0.37867	0.3117	0.21385	0.11993	0.061447	0.03051	0.1354	0.21898	0.34565	0.3987	0.39669	0.27573	0.20553	0.16276	0.068315	1
0.40889	0.42951	0.4544	0.4798	0.43675	0.39937	0.40895	0.46197	0.45846	0.45808	0.44573	0.50733	0.37655	0.38694	0.41733	0.4398	0.51573	0.43344	0.4446	0.41926	0.039318	0.11169	0.24763	0.29401	0.42844	0.3735	0.30193	0.21936	0.1212	0.060618	0.025217	0.13273	0.20992	0.34587	0.38908	0.40397	0.27581	0.19669	0.1608	0.065996	1
0.65896	0.47512	0.37224	0.41649	0.59003	0.57462	0.38	0.41118	0.49086	0.50374	0.60418	0.40375	0.37521	0.45824	0.45068	0.49618	0.4892	0.54208	0.55375	0.46631	0.024171	0.16112	0.18581	0.30969	0.42767	0.48611	0.38391	0.23731	0.12085	0.075758	0.07853	0.1451	0.24393	0.39737	0.34682	0.40665	0.30181	0.25197	0.17473	0.071199	1
0.57679	0.39387	0.36574	0.47323	0.55763	0.46164	0.39332	0.39393	0.40869	0.43689	0.36486	0.45081	0.53166	0.42947	0.47561	0.5514	0.53898	0.38745	0.30914	0.44493	0.049991	0.14208	0.15697	0.35323	0.40459	0.37199	0.37223	0.16556	0.12358	0.093665	0.054765	0.13875	0.22021	0.28951	0.41187	0.39678	0.38137	0.24677	0.072233	0.022241	1
0.45208	0.64329	0.47678	0.35169	0.40165	0.54082	0.5899	0.36109	0.38286	0.4662	0.56568	0.35624	0.35355	0.46917	0.55846	0.38156	0.50429	0.53998	0.48148	0.41447	0.066628	0.091743	0.1936	0.29926	0.44626	0.45703	0.37798	0.17897	0.14707	0.072887	0.06733	0.12264	0.25684	0.36029	0.38011	0.40027	0.30361	0.21331	0.17329	0.048426	1
0.61979	0.48142	0.31582	0.38418	0.5473	0.44773	0.39555	0.35851	0.49713	0.37641	0.35447	0.3805	0.43938	0.51111	0.43883	0.50431	0.56913	0.52129	0.38884	0.36372	0.034942	0.10277	0.15879	0.31789	0.41847	0.42761	0.39077	0.1656	0.11543	0.092875	0.067631	0.11762	0.26257	0.25614	0.40241	0.39828	0.28953	0.27995	0.13903	0.015035	1
0.44587	0.65196	0.51096	0.34191	0.35685	0.49612	0.57879	0.37084	0.37581	0.43706	0.42646	0.34755	0.44115	0.48188	0.49837	0.45626	0.51461	0.52362	0.47408	0.41371	0.045974	0.067016	0.18218	0.30643	0.45994	0.43498	0.35884	0.16623	0.16368	0.075017	0.051219	0.14652	0.21595	0.35245	0.34315	0.43731	0.29575	0.21916	0.17393	0.036653	1
0.52421	0.47246	0.39274	0.50724	0.5976	0.54119	0.5661	0.65318	0.57526	0.50946	0.43869	0.50145	0.60321	0.56573	0.53123	0.49954	0.50582	0.5557	0.48721	0.66567	0.044133	0.16225	0.23878	0.38878	0.51064	0.56015	0.37826	0.18108	0.1591	0.082444	0.04949	0.1147	0.27066	0.35886	0.45787	0.42571	0.42846	0.29645	0.20078	0.073165	1
0.44424	0.41912	0.42319	0.61494	0.45776	0.46929	0.48408	0.60029	0.44044	0.40814	0.41436	0.33059	0.36663	0.47884	0.52598	0.60474	0.51732	0.53189	0.48594	0.53701	0.013869	0.087361	0.25879	0.24289	0.46282	0.49781	0.39893	0.25015	0.11523	0.046574	0.050135	0.12797	0.21373	0.29151	0.42609	0.38937	0.35405	0.30807	0.16084	0.069198	1
0.38277	0.54759	0.5737	0.42428	0.50711	0.57863	0.53557	0.44477	0.40805	0.42016	0.41101	0.32837	0.41537	0.50492	0.55752	0.56204	0.47744	0.50725	0.48632	0.53289	0.038726	0.11352	0.22348	0.28584	0.36121	0.46216	0.43169	0.30332	0.16575	0.017523	0.040694	0.12706	0.21534	0.31767	0.39815	0.45404	0.41509	0.21707	0.1701	0.036046	1
0.50595	0.40357	0.35196	0.54431	0.55971	0.4799	0.51491	0.63334	0.54119	0.44487	0.349	0.40832	0.50994	0.57548	0.56898	0.51315	0.53111	0.50062	0.56813	0.47684	0.023114	0.16552	0.17001	0.36571	0.48355	0.50829	0.38773	0.22249	0.085804	0.074951	0.046062	0.10383	0.21724	0.3586	0.42319	0.45351	0.34718	0.31667	0.1935	0.048982	1
0.39758	0.51945	0.58273	0.55481	0.57492	0.66484	0.55278	0.48996	0.32439	0.48788	0.41919	0.5617	0.5641	0.51763	0.49455	0.47768	0.54375	0.51769	0.41691	0.62951	0.051019	0.14203	0.22327	0.307	0.44593	0.49978	0.46477	0.30657	0.11392	0.040806	0.037489	0.17583	0.24356	0.37228	0.4062	0.50578	0.3647	0.28397	0.12217	0.06762	1
0.48932	0.47451	0.45497	0.47504	0.40548	0.59573	0.5347	0.55067	0.51214	0.43114	0.5333	0.57718	0.51976	0.40729	0.43314	0.45547	0.39755	0.48067	0.63872	0.43759	0.04983	0.17823	0.20639	0.35824	0.40805	0.44994	0.41439	0.15782	0.16393	0.055292	0.0535	0.14847	0.28737	0.26282	0.40342	0.50423	0.33443	0.22917	0.18231	0.038759	1
0.44824	0.42293	0.56238	0.57565	0.53604	0.54371	0.43512	0.35963	0.41796	0.50725	0.48152	0.63089	0.44697	0.30119	0.37707	0.57883	0.49186	0.50631	0.47257	0.51002	0.047008	0.12452	0.29486	0.28117	0.40957	0.41809	0.30873	0.28625	0.14911	0.07467	0.057335	0.12466	0.19882	0.36249	0.4714	0.41773	0.35071	0.24377	0.11184	0.057595	1
0.42632	0.44109	0.5002	0.60201	0.54253	0.55771	0.4434	0.37093	0.4187	0.50884	0.55971	0.57087	0.38076	0.31033	0.46878	0.53406	0.47089	0.54667	0.44415	0.53211	0.050577	0.16767	0.25194	0.27861	0.42227	0.3913	0.34231	0.26416	0.16067	0.071933	0.049431	0.11234	0.20895	0.37581	0.4701	0.42052	0.36546	0.22818	0.12234	0.056537	1
0.44905	0.43089	0.45732	0.46505	0.58391	0.55814	0.56317	0.46151	0.39086	0.38108	0.4608	0.58485	0.50089	0.34017	0.39081	0.52709	0.45411	0.49527	0.53349	0.43905	0.019028	0.18108	0.22393	0.29426	0.46393	0.34876	0.40802	0.24678	0.1382	0.047369	0.03863	0.16425	0.23339	0.28459	0.46841	0.44757	0.2959	0.27472	0.11782	0.040554	1
0.46709	0.42974	0.40414	0.41321	0.61961	0.53242	0.55071	0.45321	0.46036	0.40536	0.522	0.45676	0.46963	0.57551	0.5053	0.35457	0.38311	0.49862	0.44933	0.49601	0.046509	0.13248	0.28314	0.29591	0.37972	0.4938	0.25996	0.33299	0.10769	0.027496	0.038928	0.14751	0.26131	0.34329	0.35054	0.45582	0.36536	0.19649	0.15749	0.053114	1
0.1349	0.1413	0.17903	0.28114	0.31609	0.34288	0.36738	0.39361	0.2849	0.43726	0.24412	0.31298	0.36077	0.28715	0.26588	0.28337	0.27584	0.20092	0.24756	0.39332	0.049033	0.11099	0.21287	0.22606	0.23445	0.23953	0.15778	0.096338	0.074126	0.035173	0.0082177	0.026118	0.094309	0.1806	0.24111	0.30643	0.30703	0.12087	0.10584	0.04956	1
0.162	0.22311	0.27648	0.36802	0.308	0.37437	0.28362	0.32407	0.29992	0.24495	0.30147	0.28443	0.30907	0.35076	0.24233	0.2332	0.36305	0.31519	0.22248	0.22575	0.013988	0.12456	0.21758	0.19264	0.22349	0.22137	0.15928	0.1481	0.10572	0.021876	0.016158	0.063607	0.11207	0.1675	0.34915	0.24065	0.25731	0.19173	0.020976	0.0019079	1
0.15486	0.19624	0.29551	0.3086	0.32998	0.35951	0.39157	0.29749	0.41141	0.29991	0.26691	0.34288	0.30275	0.28756	0.31368	0.36316	0.26712	0.23599	0.35841	0.31426	0.031198	0.083958	0.20818	0.29038	0.23474	0.23538	0.19864	0.10631	0.092388	0.040878	0.0068984	0.051648	0.12465	0.22298	0.24683	0.35504	0.18651	0.17673	0.14235	0.0063546	1
0.2129	0.30749	0.31883	0.31411	0.37848	0.38043	0.31234	0.38669	0.27151	0.48025	0.34635	0.38638	0.32141	0.34485	0.38976	0.37404	0.27921	0.32801	0.34452	0.2567	0.042129	0.10954	0.20557	0.3589	0.24375	0.23316	0.21703	0.13049	0.093417	0.043758	0.012346	0.087156	0.17137	0.15955	0.35638	0.31369	0.23866	0.25406	0.073945	0.012825	1
0.22145	0.32359	0.2705	0.41003	0.38608	0.3142	0.37702	0.37781	0.49149	0.50104	0.4253	0.33502	0.42361	0.32002	0.35426	0.38366	0.44619	0.33578	0.31256	0.34777	0.059755	0.13846	0.18491	0.30365	0.41138	0.24748	0.22045	0.15795	0.074774	0.041545	0.011208	0.089298	0.19732	0.20654	0.36164	0.35787	0.20468	0.22435	0.16058	0.039953	1
0.50248	0.403	0.36144	0.36306	0.31893	0.55074	0.2197	0.29869	0.29081	0.22643	0.24717	0.20518	0.27438	0.29826	0.36827	0.40424	0.32451	0.32777	0.53403	0.50659	0.0018095	0.0072752	0.086232	0.22351	0.36264	0.37214	0.30715	0.19516	0.13229	0.074969	0.057617	0.11587	0.16274	0.30332	0.16205	0.23756	0.31586	0.22242	0.12126	0.055906	1
0.26853	0.43971	0.42466	0.3266	0.43474	0.25929	0.41311	0.36284	0.20965	0.28619	0.28802	0.25905	0.23741	0.39663	0.387	0.33256	0.31811	0.315	0.38199	0.49943	0.0027011	0.034603	0.087538	0.26832	0.3476	0.33425	0.34758	0.15959	0.10155	0.032043	0.017816	0.10841	0.25108	0.19426	0.31977	0.17744	0.18034	0.26696	0.13741	0.061893	1
0.38105	0.28297	0.41163	0.34045	0.31196	0.45405	0.20707	0.43835	0.33433	0.19448	0.29764	0.33541	0.27714	0.25111	0.43346	0.43023	0.34506	0.31639	0.316	0.35351	0.0074151	0.065415	0.12008	0.22113	0.33968	0.34047	0.31155	0.15804	0.099987	0.013235	0.053284	0.06691	0.1866	0.32354	0.25827	0.31827	0.10257	0.13545	0.18653	0.037549	1
0.28002	0.36417	0.50151	0.36836	0.38768	0.30728	0.39181	0.46462	0.19106	0.36265	0.24907	0.24276	0.41931	0.41087	0.34086	0.32097	0.32239	0.38157	0.49251	0.44205	0.0024741	0.033705	0.14848	0.27977	0.34814	0.38944	0.29016	0.18276	0.11438	0.027412	0.018667	0.15061	0.20634	0.18992	0.31829	0.18795	0.27467	0.27997	0.13105	0.060152	1
0.29886	0.2873	0.41292	0.43561	0.37744	0.38412	0.27917	0.47123	0.36391	0.29694	0.24234	0.37545	0.44955	0.37315	0.308	0.32374	0.32488	0.45023	0.43368	0.32162	0.0062506	0.075986	0.18396	0.25179	0.35758	0.38749	0.22367	0.22585	0.070514	0.022133	0.016103	0.13184	0.21771	0.20533	0.30795	0.21658	0.30112	0.2605	0.10269	0.0465	1
0.23125	0.36989	0.37578	0.14121	0.26916	0.24013	0.25861	0.38353	0.44008	0.26652	0.52123	0.38622	0.24818	0.2282	0.38304	0.38064	0.2499	0.17918	0.2274	0.20399	0.077251	0.098606	0.16318	0.28843	0.22144	0.25448	0.17385	0.16379	0.042904	0.01184	0.019701	0.16934	0.10883	0.25615	0.3512	0.17598	0.1462	0.14141	0.11645	0.018071	1
0.51031	0.24774	0.23654	0.35026	0.29729	0.30782	0.40248	0.30589	0.27565	0.18815	0.43224	0.60045	0.30348	0.20423	0.25158	0.38856	0.30928	0.23747	0.18626	0.22791	0.032749	0.10885	0.14058	0.24517	0.35734	0.23506	0.17744	0.13392	0.095235	0.03266	0.050666	0.18949	0.13909	0.27679	0.31685	0.19611	0.15839	0.15649	0.074151	0.0035025	1
0.25783	0.25028	0.51845	0.26718	0.23179	0.26466	0.33768	0.32182	0.34296	0.26365	0.15379	0.3149	0.487	0.40139	0.30496	0.22855	0.33389	0.40774	0.25661	0.18085	0.0023652	0.08447	0.16535	0.27322	0.34591	0.19795	0.19167	0.12853	0.13227	0.012514	0.002607	0.050594	0.22227	0.25433	0.23454	0.35713	0.17561	0.086638	0.085223	0.052704	1
0.28593	0.50513	0.22439	0.26931	0.29937	0.33038	0.30449	0.36215	0.27122	0.28213	0.23827	0.48151	0.54286	0.29481	0.20995	0.26527	0.39984	0.28779	0.22549	0.1922	0.014638	0.1038	0.16191	0.23517	0.38171	0.23397	0.18276	0.12503	0.098102	0.023801	0.013951	0.13686	0.22197	0.17814	0.33873	0.26815	0.14862	0.11156	0.12869	0.0055052	1
0.40422	0.25368	0.27272	0.48918	0.19618	0.24112	0.32143	0.27048	0.30884	0.43426	0.4165	0.37756	0.38723	0.28901	0.3448	0.47371	0.3134	0.186	0.20503	0.21367	0.041677	0.12348	0.25051	0.22401	0.2349	0.22628	0.2501	0.18318	0.064042	0.013064	0.00419	0.10049	0.28643	0.24277	0.29868	0.30732	0.10599	0.14078	0.072587	0.056162	1
0.23502	0.18359	0.21917	0.18033	0.25472	0.2321	0.25646	0.29259	0.28808	0.3033	0.27346	0.3509	0.36143	0.31558	0.18962	0.075498	0.20418	0.24733	0.25084	0.17888	0.070238	0.096054	0.16753	0.14872	0.22656	0.19271	0.17761	0.056628	0.06409	0.032422	0.030829	0.058531	0.083842	0.21573	0.25901	0.22603	0.13327	0.15835	0.047558	0.020973	1
0.1457	0.25992	0.19746	0.18289	0.29057	0.22571	0.2889	0.32961	0.28334	0.35705	0.27953	0.33956	0.39291	0.35442	0.24843	0.10383	0.16012	0.24415	0.21721	0.20834	0.052929	0.14525	0.158	0.1915	0.21199	0.2083	0.16644	0.068334	0.050846	0.023048	0.026674	0.052866	0.090151	0.21902	0.26374	0.22599	0.16547	0.16665	0.045969	0.022696	1
0.28109	0.18345	0.21543	0.20039	0.18548	0.30483	0.22206	0.26755	0.29982	0.25107	0.28685	0.35495	0.35642	0.25984	0.066129	0.13103	0.27977	0.25518	0.23241	0.15747	0.046309	0.10562	0.15147	0.16562	0.21125	0.20654	0.099542	0.078869	0.080597	0.04021	0.027392	0.063194	0.086616	0.22047	0.25056	0.21151	0.12265	0.14758	0.048163	0.014739	1
0.23888	0.18312	0.21077	0.26966	0.23721	0.29303	0.30353	0.25434	0.34497	0.26674	0.2611	0.37641	0.41468	0.3194	0.1939	0.13762	0.25079	0.23562	0.26039	0.14991	0.013131	0.14951	0.1641	0.23633	0.18286	0.23598	0.15031	0.10447	0.047599	0.020687	0.029699	0.03933	0.17713	0.21871	0.22545	0.18746	0.23109	0.10334	0.061159	0.029748	1
0.19052	0.19348	0.19272	0.18716	0.30838	0.24713	0.25351	0.24877	0.1954	0.27551	0.37941	0.35202	0.27086	0.10152	0.15463	0.26073	0.2308	0.21778	0.13372	0.18148	0.036381	0.12063	0.14622	0.16487	0.19874	0.19966	0.084553	0.10531	0.049617	0.029304	0.014075	0.065051	0.16417	0.17104	0.19914	0.17564	0.20398	0.089385	0.038459	0.024449	1
0.3809	0.24572	0.30477	0.47563	0.19803	0.27925	0.31767	0.28599	0.31258	0.42614	0.40759	0.40535	0.39515	0.29846	0.30646	0.48881	0.34807	0.20323	0.19529	0.22464	0.038025	0.12326	0.24111	0.26249	0.22255	0.22543	0.24297	0.19806	0.068971	0.0095737	0.0037275	0.090113	0.2922	0.24878	0.28978	0.32735	0.11002	0.13832	0.082222	0.055918	1
0.29486	0.49698	0.21368	0.29004	0.31615	0.31583	0.30546	0.3883	0.27204	0.27864	0.31641	0.55554	0.43458	0.24527	0.2159	0.34394	0.37763	0.26038	0.19608	0.22493	0.022204	0.1259	0.15537	0.2583	0.36692	0.22109	0.17512	0.13941	0.097927	0.021016	0.015768	0.15859	0.20748	0.19167	0.36157	0.24784	0.14428	0.12501	0.12189	0.0033125	1
0.31891	0.22884	0.36159	0.47988	0.19606	0.29642	0.29468	0.31819	0.33296	0.35322	0.20766	0.40989	0.44063	0.38318	0.28766	0.27318	0.45228	0.34409	0.20888	0.19435	0.0039199	0.10081	0.19531	0.32748	0.23803	0.215	0.19687	0.16912	0.11779	0.015088	0.0027985	0.041502	0.24465	0.27008	0.25516	0.35213	0.16771	0.097787	0.081295	0.053175	1
0.28882	0.2289	0.49835	0.33174	0.20895	0.30971	0.31425	0.31206	0.36584	0.29289	0.2271	0.4357	0.44744	0.3591	0.25823	0.27709	0.4446	0.32014	0.18816	0.19555	0.0047529	0.10412	0.18243	0.32879	0.2612	0.2201	0.18919	0.15991	0.12298	0.0053634	0.0022883	0.067137	0.2541	0.2587	0.25205	0.36741	0.13899	0.10643	0.087467	0.051001	1
0.31583	0.23064	0.31536	0.50881	0.20792	0.2702	0.27684	0.3801	0.32474	0.27394	0.12598	0.15575	0.32392	0.46224	0.39207	0.35045	0.25769	0.37386	0.40887	0.2659	0.0023191	0.057335	0.15612	0.25623	0.3351	0.18925	0.19501	0.17108	0.14256	0.047623	0.0029013	0.014507	0.13251	0.30003	0.29971	0.26872	0.32058	0.096089	0.075276	0.054598	1
0.3135	0.44939	0.2891	0.43309	0.60798	0.36817	0.31106	0.19994	0.15203	0.10319	0.36046	0.27212	0.35491	0.3307	0.35641	0.39253	0.29446	0.21592	0.24203	0.39135	0.028046	0.097332	0.12876	0.11768	0.23162	0.29626	0.39692	0.17684	0.070088	0.056517	0.016346	0.11296	0.18305	0.26309	0.40067	0.33619	0.17751	0.059067	0.042501	0.025129	1
0.25364	0.49446	0.29777	0.38431	0.62707	0.3607	0.391	0.18311	0.1672	0.17338	0.35047	0.38537	0.368	0.28337	0.35128	0.3289	0.34826	0.39164	0.32056	0.2062	0.036806	0.080905	0.18809	0.22183	0.1959	0.24003	0.26631	0.31847	0.09491	0.01097	0.014462	0.12203	0.17371	0.26624	0.29027	0.44576	0.25058	0.091857	0.0079051	0.0030989	1
0.24155	0.43031	0.33038	0.33363	0.60414	0.44093	0.36007	0.22413	0.16523	0.16028	0.34862	0.36342	0.32814	0.31864	0.34922	0.34687	0.38326	0.37032	0.21343	0.24208	0.046963	0.08885	0.19727	0.16024	0.20266	0.24462	0.31317	0.30122	0.057155	0.013764	0.010989	0.096967	0.17561	0.26904	0.30901	0.43021	0.23452	0.090639	0.0048127	0.0032769	1
0.35036	0.4294	0.32254	0.50923	0.53403	0.32871	0.28838	0.1726	0.12424	0.23319	0.36842	0.29686	0.34772	0.31481	0.3595	0.39427	0.298	0.24899	0.2527	0.40377	0.029458	0.10129	0.13458	0.13585	0.23822	0.2873	0.37025	0.21553	0.072806	0.050769	0.030805	0.096421	0.19064	0.28344	0.38312	0.33432	0.14609	0.058327	0.057924	0.050885	1
0.43959	0.40089	0.33381	0.60035	0.42919	0.40916	0.25854	0.16288	0.16703	0.36642	0.4108	0.40217	0.38864	0.37756	0.33684	0.31119	0.32483	0.3813	0.37968	0.23897	0.050449	0.094457	0.16865	0.29182	0.24202	0.22828	0.24122	0.27086	0.18032	0.015374	0.034658	0.16259	0.17433	0.26385	0.30404	0.48412	0.23171	0.080114	0.026848	0.024238	1
0.28015	0.20839	0.29928	0.30324	0.3186	0.48304	0.23949	0.42119	0.36904	0.22758	0.33477	0.27516	0.26633	0.2738	0.39273	0.38463	0.25059	0.31429	0.35499	0.28289	0.043902	0.095204	0.19173	0.20824	0.22498	0.27244	0.25802	0.14332	0.10036	0.029995	0.01291	0.050208	0.082941	0.33351	0.27387	0.35676	0.11763	0.25447	0.05733	0.023554	1
0.24168	0.2769	0.3575	0.39079	0.47283	0.2253	0.29605	0.46054	0.24168	0.4599	0.26182	0.27275	0.35987	0.45103	0.3279	0.29583	0.35159	0.33689	0.30727	0.47475	0.011735	0.1039	0.19278	0.23376	0.29512	0.32051	0.25559	0.16723	0.11378	0.022905	0.017208	0.05425	0.22567	0.19558	0.28515	0.20381	0.36649	0.15102	0.14333	0.065728	1
0.26467	0.20484	0.28471	0.30151	0.32373	0.47708	0.26547	0.40734	0.41829	0.23656	0.33245	0.31691	0.26967	0.26705	0.32368	0.41809	0.32192	0.26066	0.34854	0.32563	0.061365	0.10671	0.18989	0.20579	0.22578	0.25483	0.24613	0.17481	0.089029	0.031143	0.016236	0.036966	0.099482	0.25071	0.33677	0.37566	0.13116	0.23893	0.085921	0.010376	1
0.25783	0.21082	0.27893	0.3023	0.31992	0.46472	0.29395	0.37753	0.44144	0.23649	0.3319	0.3146	0.26804	0.26746	0.31452	0.40541	0.32316	0.26203	0.35972	0.32463	0.064208	0.10962	0.1864	0.20335	0.22157	0.25468	0.24999	0.16774	0.093066	0.031621	0.016909	0.036985	0.099823	0.23303	0.35396	0.36651	0.14459	0.22966	0.092247	0.0094411	1
0.30498	0.30982	0.34639	0.44383	0.22245	0.49498	0.32091	0.24834	0.39403	0.17414	0.3378	0.25957	0.23729	0.29754	0.4628	0.40039	0.31796	0.31441	0.33407	0.2632	0.016521	0.052466	0.17988	0.27319	0.26594	0.24452	0.24155	0.18739	0.10603	0.041294	0.016243	0.035685	0.27163	0.24773	0.29248	0.17744	0.32846	0.16253	0.064697	0.015057	1
0.33673	0.24821	0.3476	0.48475	0.37661	0.47668	0.32607	0.48723	0.36724	0.29326	0.38103	0.42931	0.37968	0.32392	0.38256	0.35145	0.30862	0.31414	0.38825	0.45875	0.023799	0.1327	0.17833	0.23535	0.3254	0.39263	0.2432	0.19811	0.099827	0.026043	0.050054	0.054129	0.18333	0.34803	0.35977	0.24368	0.2556	0.20287	0.10169	0.077444	1
0.40594	0.43956	0.36784	0.40898	0.28362	0.55547	0.28743	0.20376	0.54436	0.26146	0.32055	0.28194	0.4165	0.49423	0.46055	0.38614	0.41536	0.32309	0.26688	0.37799	0.0067902	0.066788	0.21433	0.29008	0.32638	0.34255	0.25702	0.23504	0.11873	0.010786	0.046245	0.11341	0.18785	0.361	0.27115	0.2815	0.27008	0.18163	0.11871	0.03471	1
0.27336	0.48734	0.37906	0.50162	0.3467	0.31152	0.51649	0.31903	0.40039	0.6198	0.45804	0.46492	0.37401	0.38138	0.3904	0.27914	0.34489	0.45265	0.47979	0.52205	0.059686	0.14823	0.19794	0.26944	0.35779	0.4143	0.32056	0.1503	0.1227	0.050939	0.012716	0.13197	0.25947	0.26907	0.27966	0.37859	0.27591	0.1995	0.20516	0.076168	1
0.43662	0.40037	0.40286	0.39313	0.31236	0.58039	0.20848	0.26112	0.55102	0.2388	0.30645	0.28701	0.44326	0.51889	0.44484	0.39504	0.41144	0.29682	0.2826	0.39314	0.0068803	0.071158	0.21447	0.28486	0.32026	0.34296	0.26494	0.24042	0.12376	0.01231	0.038717	0.12406	0.19557	0.35537	0.251	0.28955	0.2882	0.18543	0.11037	0.03184	1
0.29263	0.27122	0.48761	0.34174	0.46071	0.3557	0.37074	0.50058	0.17467	0.4362	0.35647	0.40346	0.43275	0.40906	0.33411	0.3642	0.35199	0.31194	0.32904	0.41247	0.027809	0.12099	0.2051	0.2485	0.33598	0.32828	0.29274	0.17592	0.10168	0.014462	0.055292	0.069944	0.16819	0.31587	0.37353	0.26692	0.24764	0.19605	0.1022	0.068164	1
0.34625	0.3494	0.34562	0.21147	0.30537	0.15038	0.45114	0.38017	0.47616	0.21275	0.36755	0.28651	0.34518	0.33374	0.4152	0.30415	0.28429	0.2903	0.30625	0.29091	0.037075	0.079777	0.24251	0.20948	0.25883	0.32149	0.2043	0.12626	0.10894	0.043132	0.039934	0.089917	0.13955	0.22809	0.30995	0.31785	0.19057	0.19352	0.10084	0.0093959	1
0.32082	0.26969	0.34176	0.30515	0.50693	0.36177	0.52971	0.30743	0.36608	0.28216	0.45865	0.5492	0.42885	0.22586	0.28288	0.26801	0.37996	0.40978	0.30803	0.26154	0.042006	0.14591	0.17212	0.21638	0.42752	0.30412	0.19605	0.17324	0.088838	0.016246	0.047649	0.12241	0.16724	0.26689	0.33434	0.35654	0.16269	0.20617	0.086871	0.034727	1
0.4037	0.21089	0.30682	0.17005	0.40263	0.43009	0.416	0.35212	0.2318	0.28692	0.47057	0.23883	0.27119	0.30156	0.37557	0.44425	0.30673	0.28772	0.26431	0.25905	0.059658	0.074414	0.1306	0.34242	0.25615	0.23506	0.24223	0.15611	0.071275	0.051252	0.042388	0.068434	0.17807	0.22814	0.35306	0.2366	0.23094	0.20285	0.0576	0.012222	1
0.27408	0.25843	0.26893	0.21163	0.49698	0.35859	0.46539	0.16395	0.28129	0.14964	0.36247	0.22786	0.27738	0.25678	0.4215	0.35102	0.30558	0.25181	0.24009	0.20395	0.032241	0.049801	0.10643	0.33627	0.24389	0.2131	0.22631	0.15631	0.061257	0.034751	0.02148	0.063579	0.17837	0.24582	0.28713	0.2046	0.2564	0.14723	0.043707	0.0069956	1
0.32375	0.35222	0.21	0.30879	0.1568	0.44949	0.38983	0.47439	0.21646	0.23356	0.33856	0.28384	0.3355	0.31299	0.43495	0.32303	0.2797	0.27499	0.26489	0.24784	0.027519	0.058843	0.23166	0.25803	0.20378	0.29388	0.23452	0.10152	0.094565	0.037874	0.041404	0.086126	0.14562	0.21995	0.31766	0.24438	0.22174	0.21186	0.053959	0.0076692	1
0.24404	0.23719	0.27277	0.22044	0.21833	0.35393	0.27784	0.29182	0.34418	0.27059	0.25979	0.38728	0.39451	0.25286	0.31007	0.37585	0.31283	0.16572	0.059443	0.22377	0.0063356	0.12206	0.18666	0.23209	0.24161	0.24026	0.17391	0.12236	0.02953	0.010934	0.033058	0.098705	0.15105	0.22165	0.17845	0.27793	0.23293	0.083739	0.05881	0.038161	1
0.11085	0.21278	0.32776	0.24296	0.319	0.2023	0.22614	0.39145	0.27214	0.31493	0.33239	0.29273	0.39621	0.33	0.18222	0.24355	0.32573	0.30954	0.16265	0.056859	0.038555	0.11961	0.12696	0.257	0.27294	0.19811	0.17842	0.083742	0.028555	0.0053286	0.02986	0.085112	0.13971	0.16554	0.26709	0.19578	0.21383	0.17108	0.041638	0.0071818	1
0.16584	0.29023	0.19079	0.30071	0.19622	0.23879	0.36842	0.24327	0.30606	0.36922	0.286	0.44094	0.31697	0.23129	0.31899	0.36341	0.2813	0.12206	0.082535	0.24494	0.019109	0.13699	0.17026	0.22726	0.2601	0.23339	0.17914	0.076179	0.020861	0.016804	0.029354	0.093691	0.14041	0.20548	0.18012	0.25844	0.22148	0.098631	0.039179	0.064297	1
0.33065	0.2031	0.28861	0.19697	0.2744	0.36987	0.27222	0.31205	0.31631	0.27396	0.26556	0.32073	0.45821	0.28277	0.32651	0.36537	0.34631	0.25617	0.068841	0.14653	0.0069135	0.09001	0.23145	0.21673	0.27093	0.24606	0.17276	0.13886	0.040813	0.0053735	0.043724	0.094544	0.16451	0.22839	0.18436	0.28823	0.2491	0.079125	0.069106	0.021437	1
0.13908	0.27454	0.35617	0.24876	0.2986	0.22261	0.26065	0.43958	0.31244	0.33661	0.32168	0.32218	0.28581	0.40554	0.32343	0.18218	0.25845	0.33129	0.29488	0.15266	0.036148	0.11078	0.168	0.20923	0.30861	0.25461	0.17349	0.12842	0.039647	0.0047648	0.026248	0.091062	0.15204	0.16187	0.26418	0.25137	0.1881	0.20883	0.088322	0.0083456	1
0.23226	0.32918	0.50366	0.20473	0.26403	0.27019	0.35158	0.32221	0.32271	0.26075	0.14872	0.27086	0.4928	0.45119	0.29168	0.21082	0.29653	0.40605	0.27632	0.1989	0.0033793	0.066562	0.16894	0.2389	0.3759	0.22593	0.19142	0.12174	0.12328	0.022002	0.0023976	0.06605	0.21084	0.24841	0.23339	0.36303	0.17578	0.083789	0.095633	0.054875	1
0.33687	0.46035	0.19559	0.31729	0.30488	0.30706	0.32098	0.38906	0.26388	0.25278	0.32182	0.56738	0.42557	0.23699	0.21587	0.34516	0.36638	0.25624	0.19182	0.22264	0.024837	0.11835	0.15712	0.24615	0.36373	0.22898	0.1788	0.13599	0.09739	0.02784	0.023478	0.16924	0.19259	0.20225	0.3668	0.23766	0.14551	0.126	0.1134	0.0030393	1
0.3921	0.25395	0.26143	0.53141	0.24717	0.23419	0.297	0.32818	0.31366	0.35285	0.21212	0.40007	0.40915	0.39825	0.3172	0.28733	0.47839	0.36368	0.21109	0.1898	0.0061399	0.11874	0.21121	0.31118	0.20872	0.20686	0.21163	0.20098	0.11594	0.031619	0.0026808	0.022551	0.24832	0.31771	0.28629	0.32577	0.20002	0.091669	0.081573	0.040075	1
0.31533	0.23919	0.23367	0.50718	0.30661	0.2437	0.25154	0.39649	0.35019	0.25613	0.15309	0.13556	0.19138	0.37999	0.42981	0.38844	0.34265	0.28386	0.45715	0.39013	0.0084349	0.043571	0.13257	0.2607	0.33681	0.17839	0.19276	0.17791	0.1429	0.080287	0.0025547	0.012002	0.087425	0.2562	0.36832	0.2426	0.28845	0.16411	0.077919	0.053373	1
0.50357	0.31237	0.21194	0.31636	0.32005	0.31413	0.37345	0.29415	0.28179	0.19464	0.26445	0.53754	0.50433	0.24188	0.20822	0.2868	0.38879	0.26133	0.21732	0.20367	0.018059	0.08703	0.1513	0.22011	0.378	0.26402	0.18882	0.11225	0.093638	0.041382	0.041462	0.16028	0.19232	0.20147	0.36588	0.23326	0.13732	0.12489	0.10548	0.0026855	1
0.066908	0.10236	0.11687	0.078353	0.1064	0.11459	0.093552	0.080136	0.13254	0.1064	0.1025	0.10727	0.11231	0.055584	0.093455	0.097714	0.12525	0.10539	0.10343	0.092541	0.017348	0.051275	0.058041	0.051599	0.059219	0.082094	0.072852	0.049672	0.039202	0.015418	0.0073684	0.01645	0.034525	0.055752	0.087182	0.1578	0.088519	0.024675	0.023225	0.0054445	2
0.071267	0.10192	0.12196	0.083632	0.097852	0.11646	0.098317	0.081396	0.12973	0.1156	0.10458	0.10283	0.11376	0.052939	0.097072	0.098686	0.13262	0.1092	0.10574	0.09682	0.018315	0.052824	0.057265	0.050448	0.06041	0.087812	0.072645	0.051557	0.039565	0.016266	0.0081204	0.017039	0.030995	0.056312	0.087639	0.15824	0.095857	0.026988	0.023607	0.0061427	2
0.085574	0.1045	0.073252	0.10862	0.11104	0.097249	0.082605	0.11952	0.109	0.12052	0.066423	0.10994	0.12141	0.12282	0.067739	0.073781	0.095855	0.11695	0.13117	0.10178	0.014564	0.039397	0.065322	0.071081	0.069297	0.060364	0.062389	0.066001	0.04238	0.015463	0.0060594	0.018789	0.031573	0.05842	0.081129	0.1432	0.10997	0.029492	0.023485	0.010235	2
0.1011	0.11308	0.077535	0.10486	0.11312	0.097603	0.077041	0.11991	0.10705	0.12848	0.090688	0.11789	0.12558	0.096014	0.058913	0.10511	0.094304	0.13889	0.1062	0.11344	0.018015	0.043846	0.064568	0.066924	0.066736	0.061535	0.074571	0.061726	0.040477	0.021974	0.0084452	0.016795	0.037014	0.058621	0.09095	0.1712	0.073328	0.02703	0.027254	0.010469	2
0.1009	0.11535	0.074089	0.09838	0.10754	0.099908	0.079882	0.12896	0.10502	0.11259	0.11414	0.12216	0.10653	0.056989	0.094601	0.094313	0.12953	0.10881	0.11436	0.085282	0.01805	0.048828	0.061196	0.058176	0.067542	0.070487	0.077751	0.049663	0.037722	0.020693	0.0084231	0.015951	0.039982	0.053559	0.10605	0.16606	0.047333	0.031746	0.02854	0.0081375	2
0.10163	0.10317	0.12474	0.10153	0.085479	0.1073	0.10262	0.097406	0.089581	0.10543	0.10166	0.066874	0.071706	0.11285	0.12034	0.1156	0.096813	0.11646	0.1089	0.10653	0.025779	0.036395	0.035255	0.051358	0.089673	0.076892	0.069561	0.05421	0.045417	0.025268	0.0036395	0.014025	0.033673	0.064066	0.10041	0.17345	0.049774	0.032437	0.023972	0.00744	2
0.10851	0.11372	0.084573	0.093097	0.1101	0.10189	0.085946	0.10366	0.08856	0.08552	0.12686	0.073044	0.067536	0.10531	0.11839	0.12736	0.09872	0.098942	0.082934	0.079643	0.017883	0.048664	0.040301	0.049694	0.063063	0.094733	0.064836	0.055394	0.04066	0.013777	0.0032329	0.01607	0.045819	0.064514	0.17079	0.075259	0.047714	0.037758	0.019576	0.0072513	2
0.10394	0.10925	0.11866	0.1168	0.081095	0.10245	0.1054	0.098072	0.083935	0.10687	0.099694	0.05034	0.0865	0.11109	0.129	0.10908	0.11051	0.1162	0.11703	0.10293	0.026626	0.027879	0.034574	0.056771	0.093994	0.074197	0.071305	0.054083	0.050194	0.024017	0.003647	0.016555	0.034051	0.06559	0.10046	0.17641	0.049132	0.033721	0.023413	0.0067339	2
0.082645	0.10097	0.12516	0.091573	0.086729	0.10684	0.092926	0.088403	0.10641	0.12028	0.0967	0.10809	0.063729	0.078214	0.10256	0.12546	0.11283	0.10109	0.10869	0.10471	0.024926	0.049289	0.038156	0.04402	0.069663	0.090501	0.063937	0.054478	0.042002	0.021236	0.0056978	0.014658	0.030414	0.057002	0.089946	0.17856	0.066321	0.02877	0.022322	0.006742	2
0.10283	0.11796	0.1075	0.079824	0.10898	0.10586	0.098393	0.081482	0.1073	0.087982	0.1162	0.079197	0.061546	0.10457	0.11403	0.12771	0.10086	0.10351	0.096816	0.094789	0.023148	0.043815	0.035438	0.04713	0.076889	0.085039	0.066739	0.055378	0.043655	0.021101	0.0044415	0.012167	0.038311	0.063668	0.13657	0.14706	0.042923	0.03658	0.017636	0.0075131	2
0.091035	0.1273	0.10628	0.093205	0.058743	0.078629	0.13321	0.14796	0.1362	0.081075	0.084394	0.087342	0.11285	0.096966	0.083512	0.095575	0.12506	0.10775	0.13872	0.12611	0.0063796	0.018945	0.038175	0.045842	0.1113	0.17474	0.057136	0.03373	0.030988	0.0099445	0.014368	0.037041	0.059163	0.043641	0.068356	0.084325	0.084231	0.060694	0.056094	0.018998	2
0.12282	0.10253	0.13504	0.096597	0.092169	0.053905	0.10668	0.12412	0.12301	0.094093	0.10268	0.10391	0.080399	0.11155	0.10464	0.093286	0.083716	0.12688	0.10601	0.13487	0.008297	0.018867	0.036398	0.054887	0.09279	0.17655	0.066705	0.031135	0.025907	0.012416	0.020785	0.039652	0.060937	0.06903	0.059896	0.070002	0.0706	0.067101	0.044461	0.022707	2
0.095379	0.11794	0.12464	0.091094	0.076898	0.05685	0.12551	0.14312	0.13694	0.098104	0.092395	0.086071	0.11223	0.099877	0.089034	0.086647	0.1243	0.10591	0.13942	0.12901	0.0057981	0.020718	0.035344	0.049199	0.12327	0.17086	0.051801	0.036122	0.030818	0.011286	0.018711	0.034566	0.060345	0.047882	0.063989	0.084617	0.083921	0.06071	0.054857	0.023135	2
0.11056	0.13256	0.094284	0.099457	0.061146	0.11373	0.12929	0.12905	0.1027	0.065155	0.097922	0.073614	0.085315	0.11386	0.092469	0.084518	0.10389	0.12205	0.1058	0.14642	0.0061762	0.020774	0.032622	0.050508	0.08534	0.14614	0.10758	0.031669	0.029172	0.010956	0.011734	0.044312	0.0638	0.049527	0.062351	0.075891	0.084634	0.061411	0.045496	0.016071	2
0.11397	0.13046	0.10095	0.086333	0.059317	0.12495	0.12743	0.12988	0.086572	0.058889	0.084128	0.078123	0.080179	0.11473	0.10115	0.094412	0.084798	0.12271	0.10765	0.14379	0.0052295	0.021356	0.030513	0.052047	0.069154	0.11901	0.13677	0.038833	0.021255	0.012993	0.0094278	0.042152	0.06153	0.051294	0.062196	0.081078	0.081664	0.061836	0.042344	0.013595	2
0.063254	0.06987	0.12679	0.12566	0.12857	0.069516	0.070422	0.10056	0.12364	0.12438	0.13645	0.10712	0.12529	0.094096	0.08627	0.096289	0.1172	0.07626	0.076055	0.08814	0.010052	0.024077	0.033716	0.12684	0.12834	0.075861	0.051496	0.029244	0.020603	0.0072982	0.010676	0.040362	0.058839	0.077045	0.08225	0.065426	0.048755	0.060189	0.046164	0.013188	2
0.063157	0.062067	0.11736	0.11237	0.12038	0.070874	0.062427	0.097861	0.1141	0.13264	0.1198	0.11602	0.11043	0.078843	0.092644	0.11997	0.097679	0.065222	0.084034	0.077186	0.012056	0.015453	0.041523	0.13428	0.094788	0.064075	0.052742	0.028406	0.021082	0.0083938	0.0082691	0.031403	0.057069	0.077845	0.077158	0.063399	0.050073	0.061594	0.042335	0.010254	2
0.068523	0.097469	0.13882	0.13546	0.12149	0.059887	0.08474	0.092223	0.13014	0.12267	0.14965	0.12309	0.10702	0.11695	0.076326	0.091522	0.12352	0.11298	0.064292	0.085485	0.011136	0.027824	0.028915	0.096907	0.15929	0.089084	0.051103	0.036699	0.01957	0.0087225	0.014914	0.04777	0.058918	0.080172	0.088134	0.070375	0.044383	0.057011	0.050169	0.013134	2
0.064107	0.065961	0.1228	0.12327	0.13106	0.07396	0.06618	0.1027	0.11349	0.13252	0.13935	0.10561	0.12485	0.087226	0.08775	0.094398	0.11485	0.077052	0.079215	0.090398	0.011791	0.021384	0.036744	0.13427	0.11452	0.068368	0.053683	0.02916	0.022013	0.007623	0.010043	0.03694	0.057848	0.078064	0.084386	0.066391	0.04686	0.057532	0.049181	0.012099	2
0.06446	0.068924	0.13276	0.12743	0.12848	0.076529	0.062595	0.094836	0.11142	0.13644	0.14418	0.11202	0.11739	0.10379	0.0756	0.090488	0.11782	0.087138	0.068102	0.088666	0.013029	0.025378	0.03201	0.12213	0.1297	0.074661	0.049812	0.032542	0.020882	0.0091734	0.010714	0.043206	0.05519	0.078116	0.088832	0.067281	0.046516	0.052537	0.047907	0.013867	2
0.11593	0.12526	0.10686	0.11337	0.12238	0.1094	0.072399	0.053947	0.093101	0.084628	0.084589	0.085654	0.11702	0.1096	0.073606	0.10268	0.105	0.098615	0.084924	0.13262	0.00527	0.01311	0.030098	0.048536	0.082911	0.15197	0.10348	0.032741	0.024616	0.011095	0.018131	0.046638	0.052306	0.06519	0.082221	0.085626	0.046312	0.039087	0.037071	0.025386	2
0.12492	0.097364	0.11736	0.10056	0.13627	0.10547	0.10284	0.05092	0.097265	0.092603	0.090011	0.10418	0.13212	0.096718	0.083583	0.10943	0.094062	0.10319	0.097746	0.11522	0.0044141	0.012299	0.034224	0.05992	0.096015	0.18024	0.055354	0.034759	0.024756	0.0078987	0.021243	0.042778	0.056217	0.068803	0.083552	0.0835	0.0495	0.036011	0.039658	0.029262	2
0.085405	0.09416	0.11208	0.098363	0.13308	0.10971	0.10044	0.062772	0.085983	0.12831	0.12127	0.12697	0.082085	0.090297	0.10411	0.094159	0.085214	0.11185	0.097866	0.093198	0.0039587	0.017082	0.046775	0.063503	0.17268	0.084596	0.043647	0.042237	0.02257	0.00752	0.016832	0.041379	0.057363	0.063868	0.094763	0.063539	0.052645	0.042271	0.05299	0.019788	2
0.10654	0.10466	0.1022	0.11433	0.13325	0.099148	0.081192	0.059783	0.11639	0.10447	0.099436	0.13256	0.10348	0.08079	0.10292	0.093169	0.092577	0.094128	0.13237	0.094138	0.0052374	0.013525	0.035103	0.057373	0.1135	0.16973	0.047538	0.031293	0.024683	0.0089961	0.023105	0.04016	0.056281	0.065851	0.095886	0.064796	0.045516	0.038781	0.055816	0.02571	2
0.12133	0.10122	0.11	0.10297	0.14256	0.10269	0.1042	0.050751	0.10049	0.094527	0.09736	0.11717	0.13739	0.081682	0.089249	0.10867	0.090263	0.086559	0.1197	0.10572	0.0042221	0.011256	0.034714	0.062232	0.10709	0.17514	0.05085	0.031197	0.025321	0.0078294	0.023572	0.04345	0.0556	0.070706	0.088136	0.077475	0.044744	0.037821	0.044663	0.028375	2
0.12986	0.12771	0.072726	0.088181	0.10617	0.12237	0.12578	0.098536	0.10599	0.072532	0.11685	0.091808	0.12421	0.10096	0.095519	0.092305	0.10381	0.084541	0.097075	0.14003	0.0086489	0.023069	0.040586	0.043643	0.084406	0.17283	0.075923	0.047448	0.020416	0.0065166	0.018584	0.051433	0.062665	0.057145	0.067586	0.072855	0.082715	0.051642	0.039698	0.017978	2
0.099093	0.1272	0.12501	0.1027	0.056717	0.099473	0.098031	0.13987	0.10675	0.10773	0.13766	0.10537	0.12553	0.084099	0.091173	0.10409	0.11628	0.08086	0.1104	0.10408	0.010637	0.026894	0.028676	0.055643	0.17555	0.099997	0.055498	0.042448	0.01873	0.0095948	0.021091	0.042705	0.066008	0.070427	0.072821	0.059588	0.069287	0.065394	0.038909	0.021126	2
0.10287	0.10328	0.11369	0.059639	0.078502	0.098937	0.12204	0.11648	0.10156	0.10283	0.10815	0.13164	0.086025	0.094126	0.11706	0.10506	0.07679	0.11871	0.099035	0.067001	0.0055057	0.024459	0.026409	0.09009	0.1531	0.085976	0.05798	0.03537	0.019068	0.0077569	0.01581	0.049492	0.06015	0.053668	0.061173	0.078876	0.074194	0.052001	0.039193	0.016081	2
0.09563	0.099577	0.11114	0.072336	0.065748	0.10582	0.11371	0.13127	0.095499	0.10635	0.1048	0.13044	0.086197	0.097726	0.11432	0.10772	0.078541	0.11014	0.10368	0.067008	0.0058385	0.024838	0.026519	0.10254	0.1451	0.082962	0.056489	0.03469	0.020519	0.0070259	0.012149	0.047544	0.061472	0.056728	0.059522	0.074939	0.076567	0.055466	0.039266	0.015499	2
0.071908	0.12202	0.12953	0.12279	0.06173	0.081657	0.096796	0.13211	0.12178	0.10058	0.13156	0.10793	0.12496	0.082032	0.095056	0.11725	0.11373	0.075909	0.10158	0.095773	0.0086047	0.022638	0.028221	0.086527	0.16435	0.093073	0.058047	0.037326	0.018883	0.0085001	0.018034	0.042204	0.067542	0.07239	0.071029	0.062368	0.062403	0.065955	0.043283	0.017739	2
0.07002	0.080761	0.087711	0.17223	0.18589	0.14314	0.13471	0.087518	0.099905	0.087874	0.0874	0.055438	0.12121	0.17438	0.17885	0.14195	0.10053	0.096231	0.10756	0.088579	0.0069113	0.013486	0.025972	0.059539	0.19097	0.17467	0.054803	0.029935	0.014842	0.0080003	0.013188	0.022442	0.057745	0.098147	0.091723	0.10478	0.077811	0.049559	0.039623	0.019445	2
0.074127	0.085765	0.11073	0.18618	0.16927	0.13537	0.13018	0.08797	0.09469	0.082368	0.082311	0.070052	0.077894	0.17281	0.17872	0.156	0.11644	0.087559	0.10072	0.1126	0.0071615	0.017124	0.022409	0.046476	0.14047	0.21868	0.07335	0.030891	0.014514	0.0055565	0.014861	0.020924	0.056513	0.10106	0.092951	0.095973	0.078685	0.048473	0.042865	0.020357	2
0.085694	0.075745	0.091113	0.14549	0.17072	0.15818	0.13491	0.10721	0.086761	0.077839	0.085861	0.094084	0.05776	0.089036	0.17746	0.18502	0.15158	0.10749	0.0857	0.09936	0.0082335	0.016199	0.02427	0.047942	0.11426	0.22929	0.076223	0.028534	0.01309	0.0042244	0.017614	0.030036	0.036173	0.075351	0.11217	0.091654	0.087237	0.057453	0.0372	0.018631	2
0.069709	0.091116	0.12889	0.18024	0.16969	0.13415	0.10671	0.08972	0.08984	0.088452	0.0771	0.063628	0.14384	0.17506	0.17889	0.12913	0.093808	0.089755	0.10793	0.088713	0.0083213	0.012535	0.022768	0.050112	0.17536	0.18758	0.060736	0.029266	0.011405	0.0093561	0.010861	0.02765	0.071573	0.099658	0.093962	0.10058	0.058016	0.049989	0.037973	0.019123	2
0.082536	0.070789	0.08523	0.11439	0.1731	0.171	0.13739	0.12325	0.081603	0.08316	0.088395	0.087914	0.056383	0.1153	0.17136	0.18147	0.13909	0.099941	0.087054	0.09123	0.0056889	0.016035	0.025165	0.050038	0.1607	0.18941	0.065195	0.02666	0.012454	0.0035675	0.016928	0.032511	0.033392	0.070741	0.11228	0.089764	0.082806	0.059319	0.037332	0.019551	2
0.075137	0.079994	0.096404	0.087474	0.10093	0.13463	0.18179	0.174	0.13037	0.05746	0.066169	0.066425	0.086069	0.13403	0.17728	0.15628	0.13421	0.10341	0.10268	0.092036	0.0062575	0.024432	0.069561	0.093659	0.097253	0.10377	0.064204	0.050102	0.036548	0.010067	0.01148	0.018809	0.022665	0.040424	0.074428	0.18858	0.13887	0.040312	0.014037	0.0050978	2
0.10075	0.10443	0.094761	0.11064	0.15234	0.17736	0.1745	0.08556	0.065156	0.082262	0.068489	0.086475	0.1084	0.18761	0.17043	0.13644	0.12469	0.083009	0.10182	0.079582	0.012809	0.022674	0.056556	0.10346	0.090065	0.094737	0.076657	0.046983	0.04371	0.020737	0.0041172	0.012277	0.029273	0.067221	0.19679	0.16447	0.049248	0.025052	0.01458	0.0075015	2
0.11539	0.10853	0.094773	0.10435	0.1429	0.17876	0.17466	0.11177	0.063719	0.073148	0.081654	0.088003	0.17048	0.17512	0.13722	0.13064	0.091522	0.10425	0.086215	0.097171	0.01034	0.028604	0.0737	0.095422	0.091617	0.10288	0.060197	0.048856	0.044239	0.02386	0.0065261	0.012421	0.02689	0.07837	0.23641	0.12866	0.042234	0.023147	0.019329	0.0096819	2
0.096165	0.09565	0.085316	0.1107	0.16032	0.18369	0.17839	0.088042	0.064573	0.098644	0.07397	0.071548	0.093055	0.14798	0.18022	0.16396	0.14013	0.10555	0.093985	0.090013	0.019239	0.024775	0.04754	0.092396	0.099973	0.094746	0.088087	0.04814	0.039612	0.021731	0.0063226	0.012042	0.024449	0.04896	0.16397	0.21179	0.064559	0.028754	0.015878	0.0057849	2
0.075623	0.091422	0.098436	0.087058	0.10429	0.1486	0.18462	0.18402	0.094008	0.057986	0.064901	0.075765	0.091584	0.15189	0.17725	0.14854	0.13213	0.095319	0.098699	0.091075	0.005663	0.023271	0.068976	0.09758	0.095028	0.10333	0.065556	0.050331	0.03701	0.011391	0.011811	0.016373	0.022958	0.041268	0.089387	0.2224	0.10077	0.035233	0.011994	0.0057442	2
0.066717	0.067842	0.06113	0.10708	0.172	0.17945	0.14754	0.10106	0.092382	0.10833	0.065361	0.071901	0.086979	0.079166	0.12204	0.13389	0.16564	0.1817	0.11208	0.084426	0.0089779	0.03331	0.047181	0.069859	0.096846	0.095108	0.10468	0.058972	0.02251	0.011767	0.0068927	0.021796	0.026907	0.031901	0.062101	0.15829	0.16882	0.052819	0.016676	0.0032737	2
0.064133	0.067754	0.059889	0.11993	0.16965	0.18109	0.1393	0.097155	0.0912	0.10958	0.067225	0.075321	0.089437	0.084161	0.12215	0.13378	0.17189	0.17553	0.097542	0.078318	0.011465	0.035432	0.046329	0.068489	0.094515	0.095011	0.10163	0.05903	0.022338	0.011262	0.007158	0.020029	0.026726	0.029926	0.069711	0.16905	0.15891	0.044166	0.014363	0.0028162	2
0.065663	0.069529	0.062712	0.13855	0.16771	0.17869	0.1315	0.096913	0.093201	0.11433	0.070963	0.077129	0.097183	0.095234	0.13053	0.14741	0.17273	0.16051	0.089372	0.076038	0.013647	0.041203	0.045736	0.071748	0.093979	0.093141	0.10125	0.055696	0.024419	0.01176	0.0058643	0.018815	0.024095	0.035431	0.076745	0.217	0.12864	0.03395	0.013908	0.0033456	2
0.064131	0.072483	0.061101	0.12992	0.17059	0.17853	0.1345	0.097621	0.093638	0.11176	0.072423	0.072458	0.091462	0.082575	0.12782	0.14022	0.16846	0.17594	0.097709	0.079539	0.012154	0.039753	0.043802	0.065794	0.098512	0.091783	0.10562	0.060028	0.02343	0.01112	0.0073787	0.019141	0.024874	0.033416	0.069073	0.18839	0.15481	0.039068	0.015055	0.0035058	2
0.096389	0.0584	0.12473	0.17929	0.18032	0.1332	0.10123	0.085628	0.094862	0.085553	0.090028	0.088934	0.10884	0.1342	0.17286	0.17964	0.13483	0.087924	0.073011	0.075728	0.016235	0.037415	0.04794	0.080224	0.096585	0.093937	0.10005	0.054718	0.024803	0.018722	0.004406	0.014538	0.030684	0.065257	0.22886	0.13002	0.048295	0.025148	0.014315	0.0091599	2
0.038522	0.04969	0.081106	0.10914	0.1425	0.18081	0.18431	0.14623	0.13408	0.13911	0.10403	0.1045	0.13952	0.13622	0.12801	0.12607	0.14698	0.10691	0.11865	0.079017	0.0025724	0.0062344	0.018456	0.15293	0.31997	0.045766	0.017351	0.013018	0.016334	0.0076505	0.0059417	0.039507	0.050168	0.080708	0.089998	0.088569	0.074567	0.078453	0.049837	0.039998	2
0.059511	0.08644	0.10878	0.10585	0.13788	0.16184	0.18102	0.15321	0.13438	0.11938	0.1516	0.094437	0.11994	0.13657	0.13968	0.11986	0.1262	0.13857	0.10652	0.10536	0.0027821	0.0061559	0.013327	0.081284	0.37269	0.10238	0.017423	0.011966	0.011861	0.010267	0.026891	0.056166	0.043483	0.069718	0.089053	0.085636	0.08339	0.065526	0.063635	0.034899	2
0.03258	0.044191	0.10588	0.14705	0.18882	0.17149	0.13943	0.12964	0.14747	0.13197	0.09599	0.13953	0.13739	0.13204	0.11537	0.14475	0.11111	0.10893	0.13485	0.10853	0.0022899	0.0086406	0.013464	0.093953	0.34872	0.10871	0.018888	0.015925	0.011347	0.0051849	0.0057146	0.042785	0.073732	0.081687	0.084134	0.079113	0.075535	0.061456	0.061575	0.049079	2
0.038833	0.053612	0.085953	0.11914	0.14532	0.19003	0.17342	0.13446	0.13268	0.13778	0.10207	0.10347	0.13769	0.1362	0.12827	0.12405	0.1431	0.10535	0.12655	0.087629	0.0020356	0.0073896	0.013004	0.12329	0.3401	0.075648	0.017742	0.011772	0.014269	0.0069554	0.0090336	0.040325	0.05362	0.077288	0.088453	0.089	0.07024	0.078653	0.049602	0.044084	2
0.097812	0.1086	0.10495	0.13659	0.16959	0.18546	0.15751	0.1348	0.1033	0.06409	0.12743	0.09203	0.11198	0.14055	0.13969	0.12761	0.12793	0.14395	0.10522	0.13144	0.0025302	0.0090606	0.0097416	0.023188	0.23895	0.29219	0.023213	0.013104	0.0093445	0.0079429	0.039939	0.048362	0.050153	0.080015	0.086198	0.086945	0.077949	0.074273	0.049369	0.034025	2
0.03121	0.056911	0.05972	0.04938	0.043367	0.035979	0.044852	0.056253	0.046272	0.061708	0.032801	0.050195	0.037896	0.03525	0.042179	0.049714	0.06571	0.069003	0.063694	0.042783	0.0010582	0.0032617	0.0060997	0.013536	0.08131	0.10302	0.014999	0.011967	0.0051386	0.0019266	0.0076974	0.023799	0.026425	0.020309	0.032064	0.027661	0.029178	0.02998	0.026682	0.020452	2
0.041537	0.064262	0.053934	0.051385	0.04128	0.035232	0.047509	0.053056	0.049397	0.051289	0.025934	0.039121	0.052603	0.0367	0.035495	0.049294	0.049757	0.068934	0.0694	0.066123	0.0029721	0.0040464	0.0051512	0.013142	0.035274	0.12519	0.039152	0.012755	0.0050755	0.0019832	0.0061806	0.021678	0.031243	0.021029	0.032743	0.026153	0.027494	0.030597	0.023454	0.023494	2
0.049761	0.062924	0.050147	0.049124	0.039432	0.038199	0.053668	0.050771	0.053267	0.042035	0.022957	0.033411	0.052191	0.038932	0.0338	0.04281	0.048982	0.069516	0.066915	0.077459	0.0025538	0.005808	0.0052454	0.011465	0.026061	0.11167	0.064682	0.011279	0.0063168	0.0020042	0.0053983	0.02181	0.028661	0.020965	0.033535	0.026855	0.029057	0.030404	0.024707	0.024252	2
0.05327	0.061487	0.048964	0.045717	0.036761	0.040446	0.056918	0.048624	0.053684	0.045629	0.023532	0.035839	0.048462	0.03656	0.034087	0.0454	0.049992	0.071763	0.072819	0.075013	0.0019974	0.0051889	0.0052286	0.011341	0.029698	0.11368	0.060748	0.010771	0.0060071	0.0019485	0.0051437	0.026117	0.02395	0.022584	0.032186	0.028932	0.027541	0.028901	0.025854	0.02422	2
0.046378	0.062994	0.052351	0.049436	0.038677	0.03438	0.051601	0.052996	0.052652	0.053501	0.024541	0.041199	0.051098	0.035518	0.034798	0.047766	0.048513	0.070914	0.075485	0.069216	0.0024132	0.0041444	0.0050834	0.013079	0.03456	0.12587	0.042698	0.011638	0.0051754	0.002088	0.0068685	0.02399	0.027838	0.019996	0.033004	0.026638	0.027882	0.03055	0.025797	0.025385	2
0.12099	0.14595	0.17969	0.16393	0.13627	0.15556	0.15059	0.15519	0.12577	0.064097	0.10012	0.12013	0.11646	0.16416	0.16776	0.15907	0.15862	0.14941	0.13413	0.1297	0.0023207	0.015654	0.020149	0.024533	0.20707	0.29998	0.097902	0.023859	0.012094	0.008478	0.025352	0.063186	0.071858	0.096808	0.10364	0.092979	0.08479	0.069414	0.061457	0.029607	2
0.13065	0.16502	0.17994	0.15412	0.14716	0.15008	0.16341	0.1527	0.088999	0.050156	0.090146	0.10851	0.11275	0.16244	0.16704	0.1599	0.16274	0.15341	0.133	0.12405	0.0022443	0.013009	0.02116	0.02343	0.12312	0.32244	0.14804	0.024285	0.014298	0.0052305	0.024983	0.061626	0.076732	0.097317	0.097595	0.097243	0.079665	0.071119	0.059276	0.02144	2
0.10684	0.12647	0.1765	0.16755	0.14044	0.15495	0.15457	0.15411	0.13325	0.082079	0.11364	0.11079	0.15837	0.16538	0.16562	0.16297	0.15328	0.13223	0.13736	0.10329	0.0027732	0.01489	0.015688	0.038477	0.26987	0.2445	0.045564	0.026379	0.014084	0.01062	0.024727	0.060514	0.080847	0.094109	0.094396	0.10472	0.080684	0.073306	0.058825	0.026921	2
0.10631	0.12961	0.17496	0.16838	0.14163	0.1565	0.15141	0.15542	0.13661	0.081453	0.11186	0.11347	0.14563	0.1655	0.17195	0.16265	0.153	0.13587	0.14143	0.10438	0.0028991	0.015517	0.016371	0.037105	0.26927	0.24689	0.049375	0.024772	0.012339	0.011004	0.024249	0.061581	0.075138	0.094078	0.10044	0.10079	0.081971	0.071928	0.060727	0.028222	2
0.1214	0.15986	0.1837	0.15571	0.14775	0.15072	0.16188	0.15407	0.098303	0.059749	0.092774	0.10947	0.12655	0.16505	0.17243	0.15764	0.16019	0.14458	0.13854	0.11855	0.0020274	0.012828	0.019525	0.025143	0.18106	0.31024	0.10911	0.024543	0.013787	0.0068182	0.02589	0.059943	0.082274	0.096121	0.092111	0.10236	0.077117	0.071636	0.059452	0.024605	2
0.11283	0.13563	0.13732	0.15768	0.16034	0.17365	0.16566	0.14486	0.10725	0.095039	0.11946	0.15773	0.18204	0.15558	0.14699	0.15016	0.16118	0.15205	0.1025	0.063832	0.026349	0.060986	0.082832	0.095473	0.092516	0.103	0.076624	0.071796	0.057215	0.024578	0.0076665	0.011686	0.026044	0.073326	0.26982	0.2421	0.031355	0.018671	0.013848	0.002402	2
0.11516	0.13888	0.1443	0.15492	0.16006	0.17704	0.16674	0.12985	0.11454	0.10309	0.11928	0.14449	0.1812	0.16074	0.13653	0.15727	0.15638	0.15289	0.12416	0.066597	0.025801	0.064779	0.076815	0.095503	0.098706	0.10087	0.080479	0.070505	0.059541	0.028096	0.0090226	0.010892	0.02505	0.068408	0.25988	0.2585	0.031692	0.019698	0.014962	0.0026065	2
0.11337	0.13749	0.14253	0.15442	0.15897	0.17269	0.16703	0.13783	0.11422	0.10154	0.11872	0.14733	0.18167	0.15908	0.13972	0.15382	0.15827	0.15487	0.11695	0.066015	0.026538	0.063861	0.079235	0.096035	0.094618	0.10259	0.078992	0.071184	0.058736	0.026578	0.0085823	0.011478	0.025238	0.066724	0.26022	0.25655	0.031983	0.019465	0.015374	0.0024412	2
0.12331	0.13571	0.14988	0.16096	0.15822	0.16973	0.16379	0.1165	0.10909	0.089591	0.12748	0.16519	0.17998	0.15329	0.14572	0.15038	0.16186	0.15368	0.093067	0.053205	0.025025	0.061342	0.077573	0.097257	0.095867	0.099072	0.078408	0.070641	0.060142	0.022485	0.0059231	0.013191	0.023716	0.11536	0.31014	0.17058	0.024224	0.021241	0.01404	0.0023307	2
0.11337	0.13749	0.14253	0.15442	0.15897	0.17269	0.16703	0.13783	0.11422	0.10154	0.11872	0.14733	0.18167	0.15908	0.13972	0.15382	0.15827	0.15487	0.11695	0.066015	0.026538	0.063861	0.079235	0.096035	0.094618	0.10259	0.078992	0.071184	0.058736	0.026578	0.0085823	0.011478	0.025238	0.066724	0.26022	0.25655	0.031983	0.019465	0.015374	0.0024412	2
0.037182	0.031124	0.044737	0.055021	0.043527	0.038777	0.037022	0.026659	0.027157	0.01817	0.011285	0.021863	0.032586	0.04111	0.066062	0.054079	0.049674	0.036817	0.024145	0.023706	0.00017975	0.0029511	0.0068396	0.011959	0.039121	0.072559	0.022797	0.012561	0.0067153	0.0029687	0.0032349	0.012733	0.015911	0.028325	0.035429	0.028985	0.023012	0.019203	0.0099348	0.0027288	2
0.032675	0.041208	0.059383	0.044054	0.03837	0.036398	0.032526	0.026216	0.018683	0.035234	0.014428	0.020241	0.035559	0.054357	0.061234	0.047136	0.044096	0.044018	0.025706	0.020523	0.0011312	0.0036474	0.0054438	0.016104	0.039823	0.070423	0.02741	0.011833	0.0058654	0.0022461	0.0033587	0.013153	0.019495	0.034405	0.02995	0.025531	0.022881	0.01472	0.015618	0.0030235	2
0.054468	0.047088	0.043815	0.03555	0.039387	0.027357	0.024959	0.028205	0.033508	0.035733	0.014213	0.021294	0.042342	0.062266	0.047761	0.043731	0.047397	0.040807	0.024221	0.028302	0.0018015	0.005097	0.0062535	0.016908	0.038832	0.056229	0.03706	0.015236	0.0071154	0.001686	0.0026274	0.017722	0.029636	0.023836	0.025841	0.025816	0.018951	0.023332	0.014935	0.0041394	2
0.032593	0.047846	0.061143	0.049168	0.041386	0.051586	0.04016	0.042189	0.028703	0.038026	0.028261	0.044967	0.070284	0.052218	0.045523	0.046036	0.034708	0.021261	0.022368	0.0628	0.0017784	0.0024783	0.010035	0.030344	0.065833	0.049492	0.031503	0.014283	0.0057909	0.0029796	0.0067805	0.018169	0.034698	0.028613	0.026143	0.026608	0.019467	0.028468	0.020973	0.0045403	2
0.045568	0.060496	0.043631	0.035616	0.036533	0.028964	0.028134	0.018989	0.032697	0.032613	0.013479	0.015427	0.028151	0.050259	0.0653	0.046087	0.04428	0.046861	0.035962	0.020008	0.002744	0.0044424	0.0066563	0.01094	0.03037	0.04936	0.055416	0.013211	0.006687	0.0022671	0.0019688	0.010939	0.02786	0.030924	0.025281	0.028001	0.022111	0.014807	0.016168	0.0041347	2
0.071133	0.090714	0.10012	0.078287	0.086493	0.121	0.050397	0.016041	0.018797	0.022354	0.080212	0.074201	0.063516	0.037569	0.022143	0.031611	0.10772	0.14455	0.058077	0.023523	0.0020391	0.0091256	0.045378	0.048423	0.037883	0.017388	0.047116	0.05857	0.051918	0.0060883	0.00032081	0.0019943	0.017008	0.10648	0.12461	0.041251	0.010212	0.0083765	0.0082371	0.00454	2
0.03505	0.043806	0.084082	0.093074	0.10016	0.070248	0.099611	0.10642	0.031337	0.012822	0.077983	0.074395	0.066421	0.038878	0.02121	0.031204	0.10785	0.14696	0.07123	0.03087	0.0034681	0.037911	0.046323	0.032568	0.015117	0.045683	0.065402	0.059444	0.022715	0.0067939	0.001446	0.005612	0.0054778	0.029976	0.1215	0.12838	0.028132	0.0072994	0.0051991	0.0035016	2
0.041559	0.079526	0.090252	0.10179	0.075088	0.10045	0.11717	0.037532	0.013874	0.020559	0.077058	0.074755	0.064475	0.04591	0.021424	0.027964	0.091673	0.14427	0.088663	0.031296	0.0028622	0.022485	0.050404	0.041875	0.029948	0.021042	0.056265	0.05969	0.042319	0.0099004	0.00021678	0.0015164	0.0054611	0.077157	0.12959	0.094001	0.012965	0.0081179	0.0068173	0.0032598	2
0.025463	0.031334	0.070824	0.091493	0.098814	0.0734	0.093438	0.13954	0.087456	0.044194	0.082573	0.076306	0.080066	0.074661	0.058299	0.024307	0.023753	0.06399	0.14499	0.11411	0.024427	0.042337	0.049699	0.044399	0.029552	0.01638	0.051246	0.065148	0.043759	0.0070896	0.00070879	0.0038806	0.007519	0.0076737	0.096372	0.13301	0.10661	0.014538	0.0039366	0.001284	2
0.035399	0.044952	0.086763	0.095023	0.096976	0.072106	0.1078	0.089186	0.024274	0.010605	0.075748	0.075066	0.067755	0.029988	0.021717	0.039138	0.12872	0.13389	0.057879	0.026122	0.0025002	0.033963	0.045764	0.033154	0.015724	0.046757	0.064967	0.058471	0.020307	0.0065137	0.00097302	0.005489	0.0054666	0.039265	0.12505	0.12017	0.018899	0.0073583	0.0057223	0.0022371	2
0.032611	0.07173	0.097924	0.087204	0.090728	0.079165	0.091086	0.051445	0.015236	0.014731	0.053456	0.046537	0.039354	0.02246	0.016684	0.029283	0.11244	0.12343	0.091012	0.087774	0.0016374	0.020878	0.031063	0.025595	0.018998	0.042033	0.059835	0.045146	0.044148	0.022788	0.00070274	0.0029371	0.0042892	0.035551	0.056876	0.15264	0.048093	0.007575	0.003444	0.0017067	2
0.097635	0.092665	0.098053	0.092121	0.10422	0.070188	0.075061	0.025269	0.012312	0.013849	0.040035	0.021399	0.016596	0.029687	0.11638	0.12631	0.09244	0.092167	0.080058	0.070153	0.0014041	0.012424	0.019172	0.02146	0.04667	0.062247	0.049141	0.047428	0.042956	0.036157	0.0011175	0.0028279	0.0045361	0.030189	0.17444	0.10129	0.012514	0.0058318	0.0027696	0.0015054	2
0.017109	0.081174	0.087757	0.095503	0.088154	0.103	0.068366	0.079917	0.026425	0.013051	0.037235	0.027989	0.016514	0.016802	0.06492	0.13442	0.098392	0.089895	0.08618	0.084466	0.0015875	0.019974	0.015955	0.027365	0.050647	0.057676	0.046446	0.044172	0.044054	0.018563	0.00076878	0.0022025	0.0036021	0.012773	0.047387	0.19653	0.047971	0.0071815	0.0034983	0.0014014	2
0.11102	0.087877	0.097137	0.09131	0.10274	0.064245	0.06395	0.020017	0.011228	0.013117	0.035458	0.019096	0.017034	0.039155	0.12419	0.11627	0.088226	0.088359	0.075952	0.062057	0.0014971	0.0095133	0.017281	0.022107	0.046471	0.061559	0.047868	0.045894	0.043125	0.035876	0.0012522	0.0025356	0.0055847	0.030564	0.19395	0.073166	0.01139	0.0052963	0.0024816	0.0012317	2
0.0084797	0.051969	0.092593	0.086263	0.090331	0.096556	0.080129	0.080056	0.044353	0.015711	0.0397	0.029896	0.016904	0.016137	0.055394	0.13069	0.10159	0.083008	0.086102	0.085443	0.0038737	0.022321	0.014465	0.029243	0.053178	0.054704	0.044044	0.042584	0.043709	0.011666	0.00075471	0.002321	0.0039967	0.007675	0.03951	0.17728	0.070579	0.0082812	0.0034172	0.0014027	2
0.093447	0.10305	0.12614	0.11827	0.088475	0.12375	0.078491	0.048749	0.02487	0.020551	0.0921	0.070985	0.063898	0.041881	0.046963	0.13557	0.11556	0.094409	0.095638	0.065904	0.0037323	0.025147	0.050573	0.038917	0.039746	0.0494	0.067742	0.051612	0.046404	0.036016	0.00083857	0.0027197	0.0048712	0.096633	0.20193	0.07278	0.010448	0.0080791	0.0074362	0.001507	2
0.012382	0.032232	0.094948	0.1295	0.1057	0.089809	0.12863	0.088946	0.082521	0.075746	0.050586	0.12788	0.084926	0.073017	0.060408	0.036142	0.057326	0.14338	0.10043	0.10036	0.022941	0.047353	0.047261	0.053093	0.037568	0.036996	0.061817	0.060739	0.042486	0.00856	0.00097784	0.0034251	0.0044157	0.0082336	0.10287	0.1942	0.090898	0.0085418	0.0041064	0.0034189	2
0.019525	0.0663	0.10909	0.1285	0.10512	0.094426	0.12448	0.091545	0.077891	0.06943	0.10588	0.1126	0.076084	0.067304	0.047678	0.03556	0.10966	0.12518	0.089633	0.10341	0.029507	0.05042	0.048032	0.050368	0.03729	0.03936	0.067669	0.054929	0.045456	0.019323	0.0011093	0.0034446	0.0046844	0.014554	0.14942	0.20332	0.045426	0.0069904	0.0056209	0.0033089	2
0.015394	0.053301	0.096166	0.12295	0.11697	0.08311	0.12661	0.0967	0.090332	0.065199	0.10831	0.10058	0.075258	0.060214	0.037355	0.040339	0.12335	0.11582	0.092915	0.10038	0.03016	0.04925	0.048684	0.040872	0.036145	0.04829	0.068343	0.051233	0.045964	0.014058	0.0010333	0.003374	0.00458	0.0099212	0.13539	0.19816	0.061916	0.0080263	0.0059486	0.002969	2
0.0098228	0.013818	0.057566	0.11128	0.12719	0.094208	0.099718	0.1175	0.097349	0.079167	0.043249	0.11699	0.081218	0.06858	0.053431	0.031627	0.077412	0.1395	0.09123	0.098728	0.022285	0.050923	0.046778	0.041976	0.035412	0.045464	0.06865	0.050812	0.035176	0.0031887	0.00085767	0.002972	0.0038589	0.0067611	0.058155	0.16847	0.14561	0.010498	0.0051116	0.0023944	2
0.087598	0.08109	0.0852	0.060936	0.11937	0.12807	0.1024	0.097744	0.050132	0.035506	0.034951	0.054159	0.06213	0.07018	0.10911	0.091804	0.11084	0.1434	0.093734	0.07079	0.0097932	0.025954	0.037702	0.041138	0.066798	0.059681	0.051108	0.054505	0.042269	0.034183	0.0010645	0.0018774	0.0046254	0.010521	0.12941	0.23979	0.018827	0.0078838	0.0066429	0.0019503	2
0.10189	0.086577	0.089386	0.067149	0.12653	0.13181	0.1021	0.083743	0.038914	0.022464	0.065325	0.062097	0.099953	0.10304	0.10257	0.14535	0.11367	0.076639	0.060835	0.025599	0.0064273	0.031728	0.038771	0.061231	0.066837	0.055972	0.054248	0.047513	0.047305	0.012831	0.00083018	0.0021293	0.0064242	0.066188	0.27042	0.043408	0.01185	0.010438	0.0057105	0.0031155	2
0.096062	0.081963	0.08414	0.063118	0.12433	0.12674	0.099071	0.10276	0.047663	0.03215	0.040242	0.059169	0.061513	0.084053	0.1098	0.091284	0.13276	0.12677	0.080656	0.068731	0.0082222	0.029018	0.039215	0.042689	0.068523	0.059657	0.051177	0.052617	0.041834	0.033151	0.0010955	0.0017337	0.0046987	0.013189	0.17488	0.20252	0.014379	0.0082838	0.0069807	0.0023036	2
0.046157	0.10334	0.087998	0.089162	0.067176	0.1251	0.1291	0.097292	0.073361	0.029954	0.063964	0.071481	0.108	0.093016	0.12014	0.14195	0.091295	0.070233	0.056957	0.032507	0.01448	0.034678	0.050073	0.065685	0.058268	0.051392	0.051979	0.049807	0.030512	0.012815	0.0015496	0.0022566	0.0046441	0.027997	0.26069	0.095545	0.012858	0.0087299	0.0063324	0.0014793	2
0.014508	0.046659	0.1081	0.085048	0.084496	0.06721	0.12575	0.12766	0.093552	0.088435	0.041299	0.057193	0.071888	0.10702	0.091337	0.11866	0.1401	0.087226	0.071973	0.057373	0.022059	0.035623	0.04579	0.064219	0.056683	0.052386	0.052869	0.049866	0.030619	0.0093149	0.0009875	0.0029623	0.0047941	0.0078847	0.045213	0.27752	0.06644	0.0080101	0.0048883	0.001742	2
0.018619	0.058096	0.064007	0.081024	0.13237	0.11429	0.094408	0.09619	0.063327	0.067694	0.043136	0.052935	0.045031	0.05244	0.06342	0.065399	0.10261	0.096397	0.10578	0.15143	0.012938	0.040043	0.024748	0.039652	0.040617	0.05968	0.060201	0.049589	0.044344	0.020746	0.0013443	0.0034718	0.0039891	0.0074548	0.036168	0.1421	0.18356	0.0089961	0.0050931	0.0022407	2
0.011625	0.011352	0.03824	0.10716	0.10267	0.10431	0.085149	0.083046	0.080437	0.025106	0.050518	0.030992	0.049395	0.063615	0.047744	0.057864	0.065532	0.069567	0.10751	0.096641	0.0078417	0.022607	0.044115	0.032782	0.035052	0.045082	0.042723	0.061834	0.02722	0.0016316	0.0012046	0.0034296	0.0061725	0.010686	0.052139	0.07027	0.15999	0.0094284	0.0044086	0.0019019	2
0.052252	0.054088	0.099038	0.12375	0.10303	0.1034	0.087744	0.059628	0.061587	0.022202	0.033874	0.063161	0.051861	0.051701	0.062616	0.06548	0.097665	0.10349	0.094172	0.1363	0.0024546	0.033435	0.033886	0.030413	0.042268	0.045679	0.062455	0.053009	0.045018	0.034181	0.0011203	0.0027641	0.004827	0.019702	0.054961	0.23791	0.046795	0.006693	0.0048234	0.0012989	2
0.021349	0.047114	0.054379	0.10653	0.1215	0.10029	0.10064	0.082054	0.059749	0.055066	0.032732	0.0589	0.049756	0.048738	0.062142	0.058969	0.08776	0.10397	0.095339	0.1429	0.0057504	0.043545	0.023859	0.036291	0.040864	0.048956	0.06264	0.051205	0.041053	0.019173	0.0012254	0.0032753	0.0045641	0.0082261	0.038556	0.14204	0.16496	0.0077142	0.0046529	0.0018463	2
0.016804	0.022213	0.091728	0.12536	0.099651	0.10829	0.079711	0.073355	0.057175	0.020309	0.032591	0.04483	0.063551	0.048935	0.055583	0.066959	0.066421	0.10523	0.098108	0.10178	0.003158	0.020666	0.047304	0.026318	0.04038	0.04289	0.049532	0.060781	0.042762	0.0077751	0.001343	0.0022118	0.0056499	0.017495	0.044968	0.1697	0.089957	0.0064541	0.0045766	0.0012765	2
0.022533	0.063496	0.076078	0.10194	0.11763	0.15179	0.13662	0.073223	0.028987	0.017783	0.12745	0.12473	0.11122	0.075737	0.05407	0.037684	0.063122	0.061855	0.049441	0.064232	0.0034187	0.042964	0.066128	0.071434	0.049706	0.034338	0.049957	0.029872	0.027663	0.011535	0.0031111	0.0043043	0.0081685	0.14406	0.11736	0.069121	0.029669	0.010481	0.0047917	0.0015188	2
0.043059	0.097879	0.075449	0.10525	0.11839	0.13692	0.061954	0.026772	0.01791	0.01898	0.1227	0.10407	0.063138	0.047849	0.039948	0.066461	0.05932	0.057131	0.065332	0.058429	0.0027364	0.014774	0.068618	0.053553	0.037462	0.041273	0.043884	0.02765	0.035517	0.020583	0.00061991	0.0041431	0.036583	0.13079	0.058868	0.086099	0.013373	0.0085643	0.0042123	0.0017813	2
0.015658	0.054479	0.087201	0.084639	0.11673	0.13531	0.1404	0.069556	0.033883	0.019052	0.13238	0.11717	0.09307	0.056493	0.043278	0.04735	0.070546	0.054334	0.059343	0.064689	0.0057481	0.040142	0.072624	0.056771	0.042457	0.037849	0.048842	0.026168	0.034306	0.0091544	0.0019572	0.0039883	0.0084755	0.13113	0.098567	0.085266	0.030049	0.009891	0.0048585	0.0016319	2
0.022374	0.05587	0.10409	0.081804	0.10599	0.11669	0.11311	0.044558	0.022742	0.016907	0.11647	0.087935	0.055421	0.040405	0.055738	0.069344	0.04977	0.064089	0.063955	0.067291	0.0013497	0.032258	0.056797	0.042538	0.036862	0.053255	0.028146	0.038175	0.033862	0.01405	0.0024115	0.0034639	0.0082304	0.11764	0.05677	0.10923	0.019022	0.0098435	0.0045605	0.0016686	2
0.021537	0.050122	0.071363	0.10946	0.1205	0.16012	0.14933	0.10482	0.044221	0.020952	0.1424	0.12969	0.12221	0.099789	0.065303	0.047908	0.041568	0.068411	0.056696	0.05583	0.0069972	0.058087	0.069855	0.076063	0.056383	0.04128	0.037521	0.043665	0.022693	0.0092248	0.0018592	0.005459	0.0071768	0.1192	0.17935	0.05427	0.039134	0.010931	0.0057632	0.00104	2
0.085076	0.15628	0.15459	0.11836	0.094008	0.071183	0.10481	0.095434	0.09989	0.061393	0.10943	0.10807	0.087591	0.10252	0.13896	0.13918	0.13962	0.11969	0.073018	0.028867	0.032645	0.048607	0.048615	0.051369	0.051464	0.069831	0.074931	0.073946	0.053639	0.015612	0.001218	0.0034769	0.0085722	0.062124	0.34377	0.055981	0.017933	0.010319	0.0064428	0.0013103	2
0.075235	0.13861	0.1657	0.13575	0.098168	0.074264	0.093415	0.096429	0.074645	0.027453	0.10907	0.089673	0.098837	0.13569	0.14183	0.1395	0.11925	0.088006	0.042162	0.022647	0.020856	0.040774	0.04931	0.052471	0.057579	0.079911	0.071899	0.071366	0.037387	0.0085101	0.00092588	0.003965	0.0086788	0.15367	0.2645	0.027367	0.018711	0.0082848	0.0049697	0.0012853	2
0.13495	0.16007	0.13253	0.099843	0.075985	0.094561	0.1029	0.10333	0.081458	0.047077	0.12591	0.11465	0.0915	0.10111	0.13771	0.13896	0.13816	0.11434	0.052904	0.023557	0.027041	0.052991	0.046336	0.053937	0.056838	0.060525	0.077144	0.068471	0.06446	0.0096079	0.001447	0.0041301	0.0098189	0.15939	0.27089	0.035239	0.018056	0.010018	0.0071344	0.0024901	2
0.055124	0.1207	0.15569	0.14504	0.10431	0.080967	0.07961	0.10987	0.10149	0.10944	0.076586	0.10162	0.10108	0.089224	0.10739	0.14891	0.13629	0.12845	0.11456	0.067245	0.035861	0.05005	0.049721	0.049864	0.050662	0.06817	0.07602	0.071752	0.05411	0.024774	0.0010016	0.0027201	0.0067859	0.014659	0.21197	0.25856	0.016528	0.014247	0.0054367	0.0029213	2
0.082708	0.15356	0.14463	0.10758	0.093058	0.070428	0.10831	0.10144	0.11685	0.12501	0.06571	0.11011	0.11874	0.1009	0.08839	0.10919	0.14527	0.13702	0.12891	0.1067	0.03243	0.060532	0.053986	0.053465	0.053283	0.051396	0.069797	0.071436	0.067288	0.040857	0.0017179	0.0036093	0.0070653	0.014502	0.16878	0.31477	0.027955	0.013468	0.0063874	0.002487	2
0.1464	0.118	0.09432	0.069156	0.10353	0.096728	0.11308	0.1211	0.13016	0.038037	0.059071	0.11366	0.1292	0.11811	0.094712	0.090378	0.11433	0.14335	0.11386	0.055547	0.015277	0.052184	0.068487	0.059677	0.051618	0.054938	0.050182	0.057571	0.068508	0.033986	0.00099611	0.0037374	0.0079195	0.030807	0.30964	0.13203	0.016894	0.0096703	0.0062855	0.0038685	2
0.14139	0.10757	0.091621	0.072985	0.10576	0.098884	0.11474	0.12822	0.094475	0.023783	0.076246	0.1329	0.12361	0.11072	0.083541	0.10442	0.13842	0.12081	0.070031	0.026821	0.0078972	0.054812	0.069091	0.058841	0.053428	0.054458	0.051713	0.059416	0.06327	0.016517	0.00099892	0.0036272	0.010008	0.075791	0.30635	0.054843	0.01697	0.0094458	0.0077599	0.0033648	2
0.15381	0.13945	0.10291	0.083398	0.087841	0.10603	0.10175	0.11958	0.10849	0.049604	0.13491	0.1263	0.11436	0.089063	0.10572	0.14204	0.13972	0.11533	0.065534	0.026181	0.026886	0.067031	0.057529	0.049372	0.057797	0.055252	0.060768	0.074359	0.057835	0.019086	0.00082057	0.0039284	0.010297	0.12426	0.30681	0.044359	0.017929	0.0087073	0.0080918	0.0021994	2
0.13459	0.10105	0.077578	0.088557	0.10211	0.10313	0.11919	0.13569	0.075507	0.025427	0.059147	0.10539	0.12891	0.11937	0.095369	0.089199	0.11689	0.13158	0.083226	0.032629	0.01093	0.038782	0.070061	0.065635	0.052847	0.055562	0.054222	0.051165	0.064284	0.020018	0.0012693	0.0030193	0.0094781	0.047777	0.30705	0.06614	0.016615	0.0092848	0.0083527	0.0038539	2
0.13894	0.10189	0.084952	0.0838	0.10853	0.10335	0.12299	0.12988	0.075262	0.024014	0.066237	0.12482	0.12668	0.11863	0.090668	0.10064	0.13017	0.12549	0.070657	0.027182	0.0089027	0.044666	0.070439	0.064236	0.053415	0.056945	0.054774	0.05473	0.064214	0.015654	0.00094292	0.0035987	0.009955	0.075765	0.30381	0.054761	0.01708	0.0091852	0.0079177	0.0035494	2
0.015007	0.071854	0.10177	0.085272	0.080856	0.12272	0.086203	0.083683	0.058114	0.051615	0.08912	0.058087	0.062055	0.093165	0.064785	0.052318	0.089605	0.088556	0.076847	0.072675	0.024818	0.029468	0.02824	0.059803	0.036083	0.053768	0.043367	0.049634	0.046119	0.0039173	0.0010108	0.0036682	0.0090633	0.0312	0.14743	0.086626	0.079187	0.0083784	0.0036974	0.002661	2
0.052676	0.089505	0.087095	0.081319	0.12138	0.090526	0.086324	0.074668	0.073791	0.051057	0.13102	0.062965	0.058491	0.072311	0.088247	0.052888	0.070595	0.09908	0.079831	0.078206	0.026748	0.04648	0.025912	0.050785	0.049623	0.038924	0.053935	0.040097	0.052342	0.015714	0.00062309	0.005393	0.011137	0.048301	0.16735	0.094893	0.05886	0.0074119	0.0039021	0.0020487	2
0.015035	0.017767	0.084172	0.10043	0.079806	0.087837	0.12139	0.081451	0.082169	0.059546	0.073247	0.053722	0.055979	0.083496	0.069558	0.054968	0.084039	0.094101	0.078363	0.076081	0.025584	0.021297	0.044606	0.047958	0.037125	0.05559	0.043795	0.058082	0.026593	0.002173	0.0011416	0.003641	0.0073258	0.01422	0.096722	0.12073	0.09356	0.023772	0.0041161	0.0022286	2
0.023319	0.10693	0.13252	0.091313	0.086949	0.12258	0.083412	0.06003	0.029399	0.022628	0.060679	0.065707	0.09472	0.057358	0.059905	0.10154	0.084539	0.078841	0.072643	0.078947	0.0059336	0.014975	0.052868	0.039835	0.045879	0.0547	0.046507	0.065119	0.038015	0.013088	0.001465	0.0052498	0.010454	0.091494	0.10326	0.1265	0.026595	0.0078398	0.0062968	0.0030143	2
0.024296	0.10779	0.12445	0.087631	0.089605	0.12441	0.081158	0.056722	0.027512	0.022063	0.060232	0.06443	0.095639	0.058214	0.056809	0.097643	0.081385	0.076583	0.073064	0.074874	0.0055105	0.015841	0.049043	0.042426	0.042782	0.056806	0.044584	0.060816	0.039265	0.012472	0.001427	0.005347	0.011182	0.091506	0.09849	0.12272	0.026866	0.0078016	0.0055949	0.0027662	2
0.037393	0.074949	0.074001	0.089795	0.11066	0.11685	0.062961	0.045457	0.071039	0.069365	0.057702	0.072118	0.084972	0.088681	0.12213	0.12679	0.096138	0.063118	0.022493	0.018609	0.00058832	0.0047631	0.013916	0.044009	0.20212	0.082148	0.0113	0.0070056	0.0058726	0.0023088	0.016287	0.032965	0.038034	0.045617	0.059806	0.066583	0.043536	0.03795	0.028109	0.0029558	2
0.071347	0.089703	0.11136	0.11547	0.062298	0.045385	0.071239	0.069016	0.079065	0.096324	0.029132	0.074615	0.080672	0.11195	0.13497	0.10473	0.10157	0.11616	0.051121	0.021104	0.00089492	0.0027368	0.009242	0.038937	0.13239	0.17282	0.032863	0.0083565	0.0055928	0.0022267	0.015426	0.03605	0.045982	0.063053	0.05687	0.046803	0.039129	0.044204	0.046221	0.013141	2
0.071214	0.086452	0.11165	0.11667	0.06077	0.051583	0.077872	0.068981	0.073889	0.097544	0.019972	0.055752	0.076681	0.093981	0.13343	0.1226	0.10958	0.10803	0.078335	0.029494	0.0012337	0.003003	0.007722	0.025064	0.12113	0.18741	0.046222	0.0078766	0.0047437	0.0021604	0.0087265	0.035876	0.044305	0.06006	0.061264	0.050249	0.042449	0.039958	0.045966	0.021711	2
0.072587	0.082532	0.097316	0.12222	0.087777	0.046724	0.052365	0.075663	0.071164	0.077513	0.020889	0.036389	0.07212	0.082144	0.097181	0.1328	0.11833	0.099081	0.092667	0.049435	0.0014268	0.0028432	0.0070886	0.016776	0.081997	0.18532	0.092198	0.0088049	0.0036595	0.0022455	0.01027	0.030649	0.038924	0.049054	0.067727	0.051885	0.044479	0.036508	0.03933	0.026165	2
0.075929	0.07848	0.094026	0.12116	0.10619	0.053675	0.050752	0.078198	0.067495	0.073455	0.033833	0.053611	0.084582	0.084172	0.11767	0.13263	0.11078	0.10068	0.072533	0.023271	0.0010363	0.0024879	0.0081101	0.025294	0.10025	0.20292	0.041689	0.0078618	0.0052724	0.0023607	0.017226	0.033754	0.039274	0.051692	0.069149	0.051858	0.046577	0.039196	0.039383	0.01451	2
0.099371	0.12438	0.119	0.10035	0.069048	0.046384	0.032044	0.043081	0.051679	0.037327	0.032486	0.07866	0.12011	0.14178	0.12715	0.087743	0.068185	0.040909	0.019892	0.010368	0.001272	0.0047026	0.0074357	0.036506	0.051897	0.21358	0.031917	0.0064155	0.0032579	0.001313	0.017077	0.052227	0.064548	0.066541	0.051109	0.034437	0.02543	0.037233	0.010561	0.0027136	2
0.098868	0.12264	0.11884	0.10027	0.069673	0.045477	0.032346	0.043308	0.053146	0.038371	0.056246	0.096148	0.12953	0.14267	0.10778	0.085902	0.055703	0.029073	0.015719	0.0097993	0.0011494	0.0046965	0.011501	0.036764	0.080736	0.19879	0.015444	0.0050817	0.0039025	0.00070111	0.024819	0.058182	0.061195	0.067694	0.046823	0.029544	0.029116	0.033163	0.0089715	0.0021889	2
0.11578	0.10223	0.071289	0.044515	0.031133	0.043131	0.053497	0.040808	0.048543	0.055582	0.027548	0.060594	0.12768	0.10963	0.09024	0.066835	0.066966	0.041024	0.014187	0.01387	0.0014357	0.0044531	0.0077504	0.061763	0.042541	0.13421	0.038777	0.0056675	0.003866	0.0020831	0.013364	0.053689	0.057181	0.03476	0.025086	0.045837	0.024735	0.025697	0.021443	0.0023891	2
0.12746	0.11473	0.10568	0.079744	0.048868	0.036868	0.035307	0.05407	0.045546	0.041801	0.013293	0.024047	0.07853	0.12377	0.13941	0.11096	0.088404	0.065062	0.042607	0.020231	0.00055497	0.0038337	0.0085891	0.020496	0.048052	0.095033	0.1597	0.0094327	0.0031133	0.001767	0.0029222	0.044331	0.062705	0.065086	0.050867	0.032961	0.027966	0.037497	0.016151	0.0090228	2
0.11771	0.10943	0.089796	0.054822	0.043522	0.032483	0.049287	0.048877	0.044414	0.052	0.013385	0.017153	0.041234	0.092955	0.13761	0.10563	0.090306	0.067875	0.059545	0.029628	0.0014016	0.0037229	0.0078729	0.012057	0.063596	0.05202	0.15552	0.018326	0.0038414	0.0025927	0.0016552	0.027905	0.0571	0.064392	0.043144	0.02824	0.037237	0.026151	0.02153	0.015246	2
0.022859	0.067759	0.076131	0.11863	0.07806	0.027303	0.043161	0.06523	0.069957	0.11421	0.089549	0.11207	0.10076	0.073302	0.10664	0.069249	0.066022	0.032625	0.021103	0.016491	0.0010406	0.0035584	0.023766	0.1282	0.13816	0.020165	0.0092075	0.0075527	0.0060808	0.001824	0.015432	0.038488	0.056296	0.050055	0.030297	0.03383	0.048276	0.040835	0.026073	0.0036516	2
0.021984	0.064818	0.078699	0.11178	0.09461	0.029339	0.037757	0.05417	0.061282	0.10054	0.086409	0.10871	0.1048	0.072868	0.10074	0.067191	0.060696	0.025741	0.019182	0.014769	0.00065308	0.0031382	0.022196	0.11625	0.14175	0.019269	0.0093497	0.0078043	0.0056183	0.001508	0.014727	0.038032	0.053358	0.054887	0.031547	0.030781	0.043645	0.03767	0.022563	0.0027783	2
0.077531	0.11353	0.08452	0.028689	0.042724	0.058963	0.062758	0.10623	0.104	0.056282	0.010927	0.0572	0.10645	0.088544	0.076954	0.10263	0.078256	0.075028	0.063577	0.084247	0.00035718	0.0015163	0.0033423	0.0098762	0.12895	0.17049	0.039578	0.0071203	0.0044148	0.0026952	0.010356	0.042298	0.057927	0.030818	0.028233	0.041211	0.042459	0.049263	0.036595	0.030609	2
0.078456	0.1237	0.065754	0.030235	0.045735	0.059204	0.069561	0.1157	0.087969	0.02614	0.0059968	0.023763	0.083031	0.10215	0.069812	0.10198	0.082628	0.084256	0.059204	0.087999	0.00012969	0.0011177	0.0027717	0.0063969	0.07569	0.17676	0.074306	0.0078945	0.0045457	0.0019744	0.0035783	0.035155	0.059864	0.033155	0.027279	0.038073	0.041994	0.048601	0.038676	0.023897	2
0.07992	0.092911	0.11422	0.037716	0.033784	0.050191	0.062176	0.081025	0.12064	0.084043	0.048821	0.098194	0.10498	0.070359	0.10064	0.079138	0.079726	0.059955	0.080588	0.044492	0.00030671	0.0021442	0.0040534	0.044196	0.17722	0.12931	0.011764	0.006326	0.0050968	0.0023426	0.024642	0.044688	0.057112	0.029586	0.028767	0.041953	0.042518	0.047711	0.037938	0.025428	2
0.023951	0.03066	0.029571	0.050872	0.08948	0.080324	0.082232	0.077203	0.1205	0.066348	0.021581	0.034732	0.065815	0.080055	0.085332	0.096188	0.11419	0.087968	0.040067	0.02616	0.0010352	0.00096822	0.0031334	0.03785	0.22452	0.028618	0.0094261	0.0067015	0.0051298	0.0024605	0.00501	0.015161	0.018365	0.037925	0.047161	0.046922	0.046434	0.059124	0.03866	0.0091412	2
0.019625	0.029407	0.027549	0.039193	0.07906	0.085608	0.083649	0.074511	0.10417	0.10339	0.026726	0.036554	0.074155	0.082969	0.090914	0.099071	0.11421	0.073156	0.034849	0.018495	0.00066251	0.0013253	0.0048188	0.10266	0.17521	0.013615	0.0094126	0.0072283	0.0050286	0.0020276	0.004493	0.015309	0.01679	0.036764	0.04818	0.047402	0.045534	0.057144	0.04309	0.0077172	2
0.033313	0.031193	0.054953	0.090605	0.08126	0.08505	0.077917	0.1226	0.060211	0.022026	0.015962	0.035121	0.064834	0.081777	0.086495	0.096034	0.11459	0.094567	0.04403	0.025736	0.00017923	0.0016579	0.0018986	0.008983	0.15556	0.14512	0.0086605	0.0057078	0.0040989	0.0013148	0.0090247	0.016337	0.025362	0.046056	0.045265	0.046298	0.05239	0.056268	0.023666	0.0069287	2
0.015849	0.015799	0.027522	0.066692	0.086755	0.082002	0.078305	0.099652	0.11033	0.03244	0.064763	0.078907	0.085759	0.1007	0.11619	0.077956	0.036357	0.023461	0.015938	0.016283	0.00012668	0.00094844	0.023224	0.20429	0.039875	0.010234	0.0092163	0.00738	0.0068368	0.0017147	0.0021616	0.015046	0.040186	0.045793	0.046681	0.053738	0.061	0.029874	0.009844	0.0018333	2
0.032431	0.05454	0.084774	0.07857	0.082764	0.079395	0.12129	0.06206	0.024192	0.037669	0.014535	0.049406	0.077686	0.080644	0.093894	0.11	0.10491	0.066931	0.041895	0.01894	0.00054893	0.0018308	0.0030483	0.0088517	0.12451	0.16505	0.0094049	0.0052794	0.00412	0.0021664	0.0082471	0.020054	0.041672	0.043057	0.046019	0.052174	0.058626	0.028534	0.021084	0.0073311	2
0.065691	0.071519	0.068431	0.064078	0.065689	0.051373	0.033063	0.018535	0.025579	0.088871	0.040287	0.069098	0.07264	0.090373	0.10525	0.056798	0.052746	0.047583	0.01755	0.0075807	0.0014194	0.0035159	0.0072213	0.046043	0.081515	0.1274	0.0087266	0.002239	0.0012906	0.00021998	0.021167	0.033068	0.037494	0.039135	0.045017	0.030193	0.013356	0.022097	0.031798	0.0049159	2
0.065774	0.074067	0.05859	0.063153	0.067949	0.05022	0.025917	0.018918	0.030416	0.10658	0.031092	0.068658	0.071223	0.087279	0.10012	0.058171	0.057432	0.058281	0.025114	0.011491	0.0015089	0.0030489	0.006453	0.048637	0.082264	0.12979	0.010349	0.0026755	0.0013938	0.00095166	0.016239	0.037218	0.034845	0.03627	0.044261	0.029706	0.01261	0.025546	0.037713	0.0081956	2
0.080761	0.074008	0.069027	0.065342	0.066992	0.054575	0.035739	0.020851	0.027914	0.083447	0.015511	0.026063	0.050232	0.075919	0.071478	0.10527	0.098577	0.053847	0.056261	0.03963	0.0010265	0.0045825	0.0064624	0.010824	0.04968	0.1027	0.10884	0.0046965	0.0011111	0.0005115	0.0069616	0.0273	0.037278	0.038488	0.043723	0.046419	0.029626	0.010981	0.024207	0.02621	2
0.10988	0.088884	0.071854	0.073582	0.068741	0.069009	0.055289	0.036464	0.022086	0.019756	0.035846	0.06343	0.081692	0.079896	0.072579	0.096313	0.10976	0.048397	0.02237	0.010242	0.00094515	0.0048011	0.0049882	0.010407	0.034661	0.19289	0.0518	0.0041754	0.0022115	0.00018427	0.018588	0.049067	0.03807	0.039126	0.043975	0.04489	0.039701	0.022186	0.0071339	0.0044003	2
0.092995	0.066109	0.073438	0.066532	0.066641	0.06535	0.044562	0.020867	0.019137	0.054211	0.041416	0.068131	0.076475	0.071226	0.10306	0.096395	0.049205	0.046308	0.021191	0.0085139	0.0007674	0.0037663	0.0051426	0.026594	0.063086	0.164	0.018559	0.0032244	0.0017595	0.0010763	0.025434	0.034597	0.037123	0.038224	0.042456	0.04454	0.025139	0.0099655	0.023324	0.0047598	2
0.058878	0.045101	0.027764	0.047752	0.12195	0.08852	0.08374	0.081075	0.069454	0.023916	0.01364	0.015305	0.021	0.058194	0.073219	0.082686	0.11513	0.10305	0.084403	0.080029	0.00068979	0.0044898	0.0072569	0.0073778	0.018376	0.1832	0.084978	0.008945	0.002737	0.00032327	0.0012174	0.013275	0.033177	0.026553	0.035367	0.062241	0.048168	0.042189	0.040749	0.019487	2
0.060586	0.046568	0.027609	0.048587	0.12182	0.086336	0.084036	0.08436	0.086497	0.058769	0.016522	0.024767	0.057712	0.076833	0.084948	0.112	0.10326	0.08809	0.077129	0.06628	0.0016709	0.0050659	0.0066825	0.0093965	0.085146	0.19409	0.045612	0.0034924	0.0025064	0.00064226	0.0019283	0.029377	0.025455	0.02808	0.051771	0.058794	0.044633	0.042867	0.03886	0.027492	2
0.06088	0.048354	0.030118	0.050418	0.12488	0.090746	0.081426	0.080466	0.080996	0.044866	0.015272	0.021852	0.025414	0.086121	0.072088	0.10309	0.11525	0.092846	0.079695	0.079974	0.0013111	0.0057321	0.0073641	0.0085309	0.037722	0.20307	0.069909	0.0047421	0.0025097	0.00052173	0.0012399	0.021343	0.031284	0.028673	0.04249	0.064507	0.048136	0.041785	0.039918	0.025897	2
0.0975	0.065832	0.057363	0.038213	0.029635	0.098649	0.11255	0.077644	0.086254	0.082968	0.021706	0.052086	0.065029	0.10887	0.073467	0.10232	0.11568	0.090806	0.076263	0.048674	0.0013375	0.0046283	0.0055872	0.01022	0.15405	0.15126	0.04482	0.0046326	0.0023398	0.0010304	0.014454	0.034742	0.044178	0.028968	0.031921	0.051522	0.058955	0.04205	0.039715	0.028192	2
0.043323	0.026638	0.051855	0.12461	0.083533	0.080572	0.080077	0.08733	0.057378	0.02153	0.017774	0.023181	0.022243	0.055822	0.081866	0.11247	0.10235	0.086478	0.081159	0.072437	0.0021877	0.0056023	0.007243	0.0086074	0.014568	0.195	0.084863	0.0056392	0.0011431	0.00067335	0.0037279	0.012583	0.023941	0.03265	0.063009	0.051084	0.043586	0.041521	0.04118	0.012348	2
0.041712	0.050261	0.054647	0.082449	0.087499	0.083935	0.12079	0.096755	0.056634	0.038168	0.022333	0.03095	0.061642	0.08125	0.10635	0.11505	0.069645	0.066332	0.073087	0.085884	0.001893	0.0041413	0.0072113	0.0094616	0.066328	0.2259	0.032775	0.0030325	0.0013632	0.00082258	0.007061	0.020679	0.031127	0.036556	0.058847	0.049796	0.042024	0.049743	0.035576	0.022344	2
0.039833	0.052754	0.056127	0.075941	0.093726	0.083521	0.10919	0.10555	0.060673	0.044778	0.02708	0.033543	0.06524	0.083276	0.10921	0.11693	0.0681	0.062502	0.071505	0.086474	0.0014955	0.0047314	0.0073142	0.0091128	0.089303	0.21401	0.025199	0.0032421	0.0014515	0.0011231	0.008898	0.020764	0.032022	0.036602	0.058791	0.052933	0.040261	0.046303	0.036163	0.026012	2
0.03575	0.033128	0.050655	0.053065	0.066156	0.094364	0.083275	0.098957	0.11933	0.076122	0.045834	0.038959	0.079659	0.086235	0.11206	0.1081	0.059429	0.068212	0.063128	0.053729	0.0015465	0.0043229	0.0058879	0.036767	0.23159	0.056566	0.0073134	0.0037579	0.0030841	0.0013109	0.013431	0.01771	0.02929	0.0358	0.04622	0.058117	0.046011	0.040223	0.040603	0.025744	2
0.045101	0.044204	0.040284	0.054662	0.056123	0.072326	0.095679	0.084844	0.11322	0.10738	0.046995	0.047912	0.065831	0.083734	0.093683	0.11481	0.096005	0.055419	0.06661	0.04528	0.0010457	0.0042234	0.0060895	0.045836	0.22786	0.05015	0.011641	0.003732	0.0029715	0.0013245	0.012093	0.030328	0.023004	0.033644	0.038355	0.053469	0.052774	0.041805	0.04237	0.028726	2
0.034928	0.047646	0.054547	0.063116	0.091894	0.08214	0.094637	0.12328	0.071897	0.048507	0.030029	0.033526	0.062013	0.083497	0.1035	0.11462	0.075316	0.062558	0.072793	0.081648	0.00083491	0.0046973	0.007434	0.0092044	0.12508	0.1883	0.016997	0.0032896	0.0021314	0.0012215	0.0095629	0.018404	0.029996	0.036592	0.052046	0.055399	0.043623	0.043378	0.037744	0.028285	2
0.047479	0.070607	0.10212	0.12097	0.12843	0.12015	0.084482	0.075428	0.084536	0.058923	0.041361	0.075105	0.14168	0.13387	0.11069	0.085898	0.055375	0.077974	0.082476	0.081536	0.0009616	0.004025	0.0063489	0.013612	0.21211	0.1808	0.014691	0.011418	0.0054668	0.0015928	0.014633	0.028675	0.065464	0.061407	0.072639	0.052831	0.040477	0.038663	0.037879	0.030394	2
0.056638	0.089429	0.11001	0.11946	0.13268	0.09545	0.068196	0.039288	0.016207	0.015328	0.014509	0.013775	0.030741	0.066301	0.13467	0.13686	0.1158	0.093382	0.060075	0.080406	0.0017548	0.0038917	0.0053298	0.0089147	0.013101	0.10382	0.21024	0.01471	0.00613	0.0019324	0.0012804	0.016005	0.036434	0.067049	0.06556	0.072403	0.04763	0.03489	0.024735	0.0033517	2
0.043298	0.077573	0.10733	0.12278	0.13255	0.10662	0.082691	0.081564	0.087544	0.07343	0.042161	0.10007	0.14294	0.12809	0.1002	0.077999	0.058019	0.088865	0.086575	0.087107	0.00072272	0.0038255	0.0066517	0.0154	0.23448	0.16879	0.014591	0.010874	0.0047692	0.001321	0.01338	0.035914	0.067584	0.064002	0.069069	0.046991	0.040888	0.040736	0.041561	0.034596	2
0.034865	0.046998	0.072965	0.10422	0.11973	0.12281	0.11558	0.076056	0.049021	0.022084	0.012186	0.020546	0.041695	0.070891	0.14204	0.13884	0.11339	0.088045	0.057258	0.07697	0.0014018	0.0034231	0.0070352	0.0087405	0.0425	0.25454	0.036215	0.013181	0.0049692	0.0016531	0.0021529	0.013687	0.027106	0.052755	0.068433	0.069213	0.060966	0.037685	0.029778	0.016232	2
0.049345	0.074613	0.10727	0.12507	0.13086	0.11439	0.083462	0.075555	0.082544	0.04747	0.032389	0.06054	0.13744	0.14088	0.11551	0.090687	0.060599	0.07613	0.081431	0.089289	0.00068917	0.0037512	0.0062344	0.011466	0.15492	0.23214	0.017202	0.012374	0.0047133	0.0019292	0.013286	0.02656	0.066615	0.063058	0.070866	0.05389	0.041989	0.039117	0.037759	0.028465	2
0.11673	0.10183	0.087445	0.074685	0.097933	0.13753	0.12653	0.11053	0.076379	0.023635	0.069479	0.093885	0.090051	0.087293	0.081835	0.057495	0.090611	0.11233	0.13445	0.12801	0.0023907	0.0063418	0.0068811	0.015215	0.045979	0.29261	0.089156	0.0086408	0.0035831	0.0011558	0.032838	0.050845	0.043731	0.043578	0.046265	0.047732	0.066933	0.06175	0.060417	0.018215	2
0.092065	0.091166	0.078197	0.079542	0.12069	0.13482	0.12675	0.099504	0.069488	0.033786	0.079352	0.089437	0.086406	0.067998	0.063991	0.09753	0.12349	0.13736	0.11886	0.055186	0.00098457	0.004748	0.0082187	0.014676	0.080118	0.30329	0.035472	0.0075582	0.0037822	0.0013382	0.033262	0.04332	0.041521	0.039797	0.043586	0.068396	0.066741	0.065037	0.040516	0.015145	2
0.079128	0.088894	0.086196	0.07666	0.093059	0.12969	0.1254	0.11207	0.09334	0.052815	0.097267	0.089994	0.085673	0.078072	0.060103	0.093275	0.11417	0.13454	0.1229	0.055221	0.0010145	0.0043006	0.0097257	0.012041	0.1729	0.24007	0.017642	0.0071531	0.0027668	0.001183	0.036752	0.045003	0.039827	0.043337	0.043201	0.056707	0.06709	0.060123	0.053445	0.020187	2
0.088117	0.077189	0.078759	0.11476	0.13306	0.12309	0.09284	0.043118	0.019856	0.01986	0.022231	0.022414	0.054436	0.072875	0.07934	0.052267	0.081748	0.1118	0.13469	0.14486	0.0022647	0.0044309	0.0088947	0.0099078	0.02082	0.043552	0.24025	0.048659	0.0044243	0.001087	0.0044556	0.029901	0.038456	0.042895	0.041216	0.061179	0.068478	0.062852	0.03648	0.0040851	2
0.084685	0.073336	0.087934	0.124	0.12727	0.11856	0.099125	0.065206	0.035423	0.017719	0.029016	0.066224	0.08414	0.058297	0.071699	0.098688	0.12915	0.14432	0.10474	0.048329	0.0011355	0.0037981	0.007052	0.01669	0.022588	0.22145	0.13149	0.0081833	0.0037063	0.001073	0.018044	0.035492	0.038597	0.04084	0.058407	0.069858	0.065591	0.055427	0.026346	0.0062308	2
0.10049	0.075743	0.068574	0.072899	0.047225	0.054983	0.10836	0.1186	0.093934	0.079486	0.044725	0.11097	0.10332	0.10163	0.13053	0.12336	0.091641	0.075453	0.039537	0.01565	0.0019423	0.0055156	0.0085069	0.076405	0.17879	0.11389	0.018069	0.0077074	0.00365	0.0011905	0.02901	0.045194	0.040134	0.038926	0.045404	0.061646	0.061199	0.047281	0.035219	0.0073023	2
0.075899	0.07278	0.078339	0.055945	0.05057	0.09468	0.12012	0.10087	0.082873	0.071514	0.01957	0.06044	0.096745	0.10884	0.12765	0.12899	0.092827	0.081153	0.06597	0.03191	0.0020269	0.0050376	0.0081608	0.031302	0.18674	0.11972	0.034283	0.0090625	0.0035425	0.0014149	0.0090419	0.039368	0.040213	0.044604	0.047215	0.068181	0.05751	0.044074	0.033786	0.018764	2
0.071649	0.077075	0.053477	0.054963	0.10128	0.12255	0.10119	0.077897	0.071721	0.066736	0.019731	0.038514	0.085444	0.11055	0.13518	0.11599	0.088372	0.089875	0.062383	0.057923	0.0020021	0.0054873	0.0070898	0.01296	0.15139	0.16561	0.044108	0.010259	0.0040858	0.00093475	0.0061642	0.032055	0.036496	0.048179	0.060723	0.064607	0.050221	0.0399	0.03313	0.023809	2
0.11379	0.083029	0.074564	0.075883	0.062463	0.05141	0.08079	0.11964	0.10064	0.085033	0.065753	0.12158	0.10976	0.10652	0.12711	0.12737	0.091053	0.064463	0.034425	0.013842	0.001639	0.0049246	0.0096816	0.109	0.15854	0.12106	0.014544	0.0072333	0.0033717	0.001123	0.036482	0.050673	0.043328	0.041156	0.049327	0.052625	0.06351	0.048127	0.031958	0.0074797	2
0.072981	0.070425	0.063962	0.047444	0.080339	0.11869	0.10891	0.088615	0.071974	0.089698	0.049892	0.08894	0.10788	0.13035	0.11581	0.086494	0.088334	0.064603	0.052671	0.030636	0.0024644	0.0044571	0.0070916	0.05674	0.21707	0.078488	0.01931	0.0072345	0.0038147	0.0015272	0.021393	0.035304	0.040697	0.041308	0.066251	0.061793	0.046831	0.038479	0.033022	0.019083	2
0.064371	0.043256	0.046584	0.082314	0.068938	0.062771	0.056404	0.065594	0.11822	0.094375	0.035379	0.037576	0.077862	0.062884	0.073745	0.10003	0.13544	0.11099	0.058003	0.020695	0.0013957	0.0052191	0.0083276	0.037701	0.16285	0.068216	0.05495	0.007448	0.0045872	0.0012749	0.013936	0.021659	0.026785	0.04234	0.037084	0.05608	0.038415	0.05167	0.055953	0.0099242	2
0.064492	0.040382	0.048933	0.08178	0.067701	0.062859	0.056605	0.066242	0.12379	0.091131	0.036552	0.036432	0.071042	0.062279	0.073652	0.099532	0.13506	0.11636	0.061864	0.020286	0.0014905	0.0052714	0.0080351	0.033352	0.16804	0.065142	0.055637	0.0074353	0.0049503	0.00099772	0.014962	0.019024	0.027339	0.041175	0.037029	0.056567	0.037571	0.053705	0.055703	0.011167	2
0.047262	0.08585	0.069415	0.062961	0.056365	0.069449	0.12148	0.095126	0.079935	0.06436	0.0174	0.038698	0.055015	0.051247	0.086268	0.1366	0.12407	0.13556	0.087751	0.03253	0.0014473	0.0039577	0.0097436	0.011893	0.13026	0.13946	0.057077	0.019232	0.0042686	0.0030532	0.003274	0.022426	0.033219	0.040312	0.058018	0.041834	0.06467	0.056912	0.040344	0.017267	2
0.050463	0.041299	0.042453	0.07683	0.069181	0.061907	0.058406	0.06292	0.11535	0.0967	0.040195	0.072473	0.067378	0.065934	0.092794	0.13643	0.1107	0.065564	0.020176	0.016435	0.0013975	0.0054068	0.010609	0.1219	0.092712	0.078403	0.016833	0.006818	0.0039061	0.0017639	0.014291	0.019225	0.038201	0.033029	0.041943	0.052926	0.039455	0.06312	0.03487	0.0026628	2
0.05851	0.052362	0.039827	0.074872	0.076552	0.062124	0.059931	0.056788	0.10446	0.10582	0.039389	0.047666	0.079861	0.064077	0.07989	0.11296	0.13028	0.097103	0.029797	0.018341	0.0014133	0.0050275	0.0085978	0.079095	0.13125	0.080717	0.032494	0.0071934	0.0042173	0.0015012	0.014201	0.024601	0.026101	0.042981	0.037703	0.056238	0.037989	0.050605	0.05169	0.0046057	2
0.049617	0.095471	0.097394	0.080982	0.090523	0.079409	0.092267	0.056644	0.053022	0.053425	0.10176	0.10266	0.064907	0.080124	0.070636	0.064964	0.07811	0.067451	0.0693	0.042579	0.0056072	0.017966	0.036754	0.02174	0.088804	0.13714	0.027608	0.014313	0.018584	0.0037854	0.013657	0.045839	0.035796	0.042902	0.073136	0.059747	0.045842	0.031792	0.015093	0.008575	2
0.058872	0.069269	0.073644	0.087542	0.075406	0.089369	0.060576	0.058783	0.058135	0.047961	0.099121	0.077882	0.086111	0.06781	0.070791	0.075078	0.059551	0.057154	0.042479	0.039466	0.004837	0.026631	0.030661	0.017873	0.076197	0.12992	0.023152	0.015458	0.011004	0.0018018	0.016414	0.027945	0.037422	0.06376	0.056181	0.054477	0.03599	0.01967	0.021866	0.0055137	2
0.10653	0.098252	0.08123	0.094218	0.075444	0.092827	0.044757	0.051053	0.053455	0.050182	0.09358	0.10629	0.070612	0.099221	0.06926	0.063282	0.078391	0.059095	0.064893	0.042858	0.0018865	0.019324	0.04092	0.03143	0.044791	0.1187	0.090253	0.013893	0.01012	0.0066009	0.029075	0.043534	0.03312	0.05353	0.060616	0.058048	0.055916	0.021372	0.014471	0.0046372	2
0.075608	0.11427	0.10778	0.092704	0.09965	0.080671	0.095965	0.059992	0.033873	0.044906	0.097086	0.10238	0.10106	0.060955	0.077127	0.070616	0.065951	0.081409	0.06861	0.073918	0.0023598	0.014333	0.039143	0.033674	0.073217	0.12864	0.068869	0.015169	0.013806	0.01427	0.019311	0.041992	0.056377	0.041439	0.067232	0.06528	0.048801	0.038078	0.019144	0.0037787	2
0.065858	0.074291	0.078798	0.090819	0.073198	0.095298	0.044212	0.065392	0.05502	0.054665	0.099133	0.073792	0.096361	0.072212	0.06725	0.079178	0.059309	0.061647	0.045241	0.041151	0.0057628	0.026355	0.037591	0.015598	0.054172	0.14574	0.036074	0.013921	0.0099354	0.0021781	0.021365	0.025433	0.039807	0.060595	0.0561	0.061126	0.036878	0.021993	0.021796	0.0048229	2
0.0504	0.070803	0.068672	0.052385	0.074317	0.083023	0.063371	0.054065	0.03999	0.048795	0.045273	0.053415	0.078816	0.0683	0.073041	0.081832	0.056837	0.050841	0.045214	0.049428	0.0020666	0.0086622	0.028035	0.039941	0.034876	0.10625	0.061654	0.014084	0.0056302	0.00082904	0.011544	0.021003	0.035012	0.042108	0.049013	0.042008	0.041719	0.032894	0.017336	0.0078163	2
0.071073	0.071026	0.053036	0.070141	0.082057	0.050525	0.053797	0.037626	0.039237	0.080609	0.028375	0.031851	0.048215	0.086611	0.075128	0.093653	0.079754	0.069199	0.054913	0.048038	0.00182	0.0070277	0.02767	0.046019	0.050257	0.02997	0.0953	0.039506	0.0071806	0.0024667	0.0021052	0.020205	0.037037	0.042217	0.047377	0.04424	0.044223	0.041044	0.021766	0.0061499	2
0.055771	0.071469	0.062487	0.061024	0.082637	0.047836	0.053553	0.04755	0.035126	0.048979	0.031095	0.029976	0.0471	0.056456	0.084184	0.066358	0.081084	0.069821	0.05907	0.044155	0.0014691	0.0054327	0.01707	0.043446	0.047492	0.030709	0.092994	0.037069	0.0074481	0.0021656	0.0021758	0.01683	0.034234	0.041253	0.044165	0.049193	0.03934	0.031903	0.016923	0.0071052	2
0.06348	0.071202	0.054775	0.060289	0.085715	0.069116	0.055523	0.039498	0.040045	0.078606	0.031819	0.049055	0.075757	0.07308	0.083643	0.085479	0.065441	0.059927	0.043712	0.057739	0.0024335	0.008188	0.032439	0.0413	0.043024	0.057343	0.09625	0.022311	0.006532	0.0014469	0.0071735	0.021505	0.036283	0.043016	0.049446	0.042307	0.041908	0.038974	0.019734	0.009029	2
0.056658	0.070892	0.060242	0.058654	0.086375	0.063933	0.058426	0.04371	0.038417	0.060679	0.031811	0.042554	0.049763	0.086554	0.067851	0.081089	0.078402	0.06128	0.049909	0.050147	0.0021097	0.0070447	0.024958	0.042762	0.043832	0.042012	0.099236	0.025702	0.0059629	0.0023904	0.0045327	0.018073	0.03583	0.041956	0.048533	0.046953	0.042264	0.034287	0.018795	0.0068523	2
0.020623	0.021767	0.021849	0.045775	0.099259	0.15575	0.12959	0.10015	0.096507	0.096991	0.11032	0.1008	0.13463	0.11495	0.074772	0.061428	0.053157	0.037315	0.052569	0.036612	0.0023831	0.0091571	0.085264	0.17541	0.059368	0.027399	0.01126	0.012177	0.0083099	0.0014975	0.0029621	0.013043	0.045063	0.059609	0.087683	0.053399	0.049036	0.034929	0.024363	0.015294	2
0.023704	0.051046	0.10481	0.14347	0.14195	0.10271	0.088938	0.096502	0.070903	0.091739	0.087453	0.10403	0.11266	0.14277	0.10434	0.066948	0.061774	0.079009	0.078733	0.074713	0.0022092	0.0074418	0.014366	0.056798	0.25597	0.070494	0.029471	0.0088463	0.0074694	0.0038635	0.0070425	0.043935	0.050207	0.07653	0.079072	0.050302	0.045547	0.034882	0.051924	0.021301	2
0.021822	0.023517	0.028019	0.065829	0.11234	0.15909	0.13018	0.097372	0.091828	0.092429	0.086923	0.10235	0.11178	0.14237	0.1021	0.066615	0.059707	0.048052	0.035865	0.054787	0.0013883	0.0086208	0.030536	0.21486	0.072408	0.042456	0.012496	0.010897	0.0082869	0.0022582	0.0025696	0.016393	0.048712	0.055063	0.08655	0.069656	0.046037	0.039122	0.026419	0.01767	2
0.022407	0.023678	0.0287	0.071832	0.11337	0.15988	0.12341	0.096267	0.095192	0.087407	0.09497	0.096886	0.11152	0.13862	0.098155	0.06554	0.061484	0.046247	0.037202	0.059508	0.0013144	0.0086167	0.029777	0.21293	0.071729	0.04383	0.012489	0.011473	0.0089224	0.002407	0.0026904	0.017205	0.049858	0.054602	0.087925	0.064395	0.047095	0.037733	0.02502	0.018909	2
0.021692	0.020549	0.025993	0.063855	0.11063	0.16671	0.12078	0.092286	0.093395	0.088385	0.10495	0.10009	0.12939	0.12775	0.078344	0.056357	0.058854	0.043126	0.045657	0.04625	0.0019686	0.0081263	0.043575	0.20744	0.065756	0.03659	0.01127	0.010744	0.0085693	0.0015171	0.0032814	0.016919	0.047667	0.059883	0.08993	0.053324	0.046062	0.034395	0.027703	0.016145	2
0.083302	0.065505	0.073565	0.12853	0.13903	0.10596	0.10409	0.080621	0.091079	0.076989	0.10207	0.10919	0.12955	0.15966	0.11098	0.087473	0.077705	0.072827	0.060021	0.042971	0.029156	0.033798	0.05231	0.058153	0.10481	0.071053	0.047277	0.036376	0.025448	0.012809	0.0011073	0.004404	0.026729	0.10032	0.24207	0.036157	0.021361	0.015472	0.021351	0.0066893	2
0.10763	0.083184	0.065477	0.076076	0.13492	0.14167	0.10587	0.1012	0.062029	0.061418	0.11103	0.14529	0.14253	0.10289	0.084949	0.076861	0.087463	0.075025	0.065262	0.040071	0.010275	0.04724	0.055762	0.10124	0.062269	0.052354	0.041873	0.041951	0.040467	0.011367	0.0015845	0.0060019	0.032118	0.13964	0.18867	0.027487	0.023791	0.020657	0.017564	0.0058001	2
0.081423	0.064726	0.080565	0.13934	0.1319	0.10086	0.10051	0.06793	0.066729	0.035403	0.10521	0.1229	0.16144	0.11023	0.083981	0.076403	0.070736	0.059098	0.041124	0.039748	0.0050827	0.034999	0.050441	0.065587	0.10781	0.05473	0.045687	0.038923	0.023372	0.0055907	0.0016238	0.012109	0.036132	0.20777	0.080612	0.024714	0.024278	0.025883	0.014549	0.0039953	2
0.11352	0.10925	0.075815	0.066899	0.093633	0.14415	0.13346	0.10145	0.089567	0.060932	0.11194	0.14349	0.14537	0.10569	0.090326	0.093933	0.080216	0.087959	0.082953	0.040905	0.0242	0.046368	0.064436	0.088893	0.051794	0.053611	0.048368	0.05078	0.049095	0.014771	0.002846	0.0053872	0.029449	0.072329	0.27875	0.044776	0.02146	0.016307	0.013389	0.0040092	2
0.084363	0.063793	0.076105	0.12011	0.13678	0.10453	0.10285	0.084897	0.097429	0.093555	0.10761	0.0983	0.11581	0.1634	0.1245	0.091246	0.083317	0.070824	0.068026	0.042976	0.038593	0.033178	0.052186	0.055266	0.097533	0.081058	0.047945	0.037612	0.02631	0.014655	0.001239	0.0041802	0.023109	0.066319	0.27004	0.05873	0.019382	0.012085	0.022684	0.005727	2
0.10773	0.13867	0.12283	0.13469	0.096914	0.15097	0.18197	0.1016	0.10024	0.080964	0.058361	0.086332	0.092191	0.16227	0.24749	0.15633	0.10074	0.093596	0.094018	0.12901	0.011838	0.032238	0.026426	0.035694	0.089915	0.2134	0.14056	0.025207	0.016083	0.0084199	0.004612	0.042258	0.054515	0.098003	0.1042	0.098115	0.086994	0.06267	0.040677	0.013258	2
0.14698	0.12438	0.13671	0.10391	0.1557	0.17704	0.10221	0.10594	0.10496	0.093697	0.091217	0.068957	0.1643	0.23586	0.12893	0.092019	0.091382	0.11246	0.12663	0.13433	0.0083121	0.026768	0.026413	0.041407	0.10326	0.24926	0.11983	0.022986	0.017637	0.0065691	0.014058	0.047264	0.09185	0.090009	0.090683	0.092212	0.07139	0.052262	0.039077	0.035246	2
0.14496	0.12418	0.13132	0.10483	0.16465	0.17285	0.097705	0.10682	0.093472	0.089818	0.086318	0.067576	0.1073	0.24451	0.15494	0.10004	0.09691	0.093302	0.13336	0.14288	0.00989	0.029513	0.027508	0.036196	0.089775	0.21619	0.15126	0.0264	0.015735	0.008572	0.010749	0.040861	0.087786	0.09013	0.097334	0.094197	0.072083	0.053997	0.038096	0.029054	2
0.096933	0.1427	0.13391	0.12187	0.098947	0.16632	0.14388	0.076447	0.085481	0.069085	0.043131	0.064836	0.089735	0.096745	0.20108	0.22458	0.12856	0.092511	0.078803	0.12405	0.0076141	0.028778	0.033204	0.029432	0.059755	0.1558	0.19599	0.041186	0.011548	0.0083263	0.0045351	0.027295	0.050229	0.097715	0.099264	0.10506	0.081419	0.061007	0.031512	0.0089622	2
0.10881	0.13977	0.12424	0.13403	0.099126	0.15477	0.1799	0.10289	0.10228	0.083443	0.067269	0.08914	0.11344	0.21316	0.20661	0.12126	0.090068	0.078938	0.12402	0.11885	0.010368	0.029263	0.029139	0.040816	0.11235	0.23367	0.10133	0.025467	0.018299	0.0096528	0.0059598	0.047998	0.060389	0.097914	0.10692	0.0906	0.081314	0.061636	0.039718	0.015754	2
0.16602	0.091764	0.11449	0.10533	0.16781	0.1598	0.12513	0.20328	0.19662	0.13818	0.1216	0.15071	0.17051	0.19906	0.13012	0.15641	0.1383	0.12888	0.15964	0.12663	0.005156	0.032743	0.059582	0.10619	0.1304	0.28685	0.064256	0.025464	0.021209	0.0042931	0.028868	0.061176	0.075636	0.070216	0.10386	0.1259	0.089292	0.083064	0.067595	0.034026	2
0.17571	0.099574	0.10604	0.10826	0.15037	0.19691	0.14594	0.18876	0.20986	0.10364	0.12602	0.13036	0.16742	0.16381	0.20251	0.13669	0.13322	0.14141	0.12355	0.1487	0.0039444	0.050522	0.057572	0.10631	0.089806	0.25842	0.12074	0.029618	0.02022	0.0036052	0.011227	0.059275	0.099392	0.091168	0.095345	0.10637	0.10265	0.074654	0.072021	0.026492	2
0.16516	0.087843	0.10069	0.11421	0.18821	0.18072	0.14231	0.19909	0.15072	0.091149	0.095241	0.12035	0.14228	0.15347	0.19474	0.17604	0.1257	0.16247	0.12332	0.13528	0.0052506	0.0324	0.062489	0.094671	0.11224	0.1513	0.19406	0.042986	0.013878	0.0048703	0.0044183	0.045888	0.094936	0.098231	0.094139	0.10999	0.10548	0.075596	0.071278	0.014336	2
0.16673	0.12419	0.095188	0.098604	0.12277	0.20634	0.15732	0.15778	0.21292	0.11577	0.09464	0.13806	0.17607	0.16173	0.19235	0.17723	0.12331	0.14614	0.11439	0.13294	0.0053605	0.050607	0.058635	0.10231	0.088461	0.23217	0.13614	0.032371	0.017445	0.004759	0.0069586	0.057612	0.070436	0.11963	0.093752	0.10035	0.10643	0.079238	0.067521	0.022627	2
0.17461	0.090276	0.11516	0.11306	0.17382	0.18221	0.13778	0.21157	0.19755	0.10505	0.12555	0.12989	0.1623	0.1764	0.19898	0.12107	0.14891	0.138	0.12847	0.16083	0.0035326	0.048206	0.05622	0.10849	0.093684	0.26591	0.11887	0.031336	0.022676	0.0030682	0.012644	0.055167	0.10423	0.082849	0.09018	0.11285	0.10631	0.076259	0.074306	0.030229	2
0.086846	0.088846	0.14856	0.16806	0.1506	0.13083	0.15791	0.10232	0.10023	0.068362	0.072028	0.098677	0.14101	0.11	0.097921	0.10049	0.13624	0.17455	0.12852	0.13557	0.0041349	0.020503	0.02642	0.039669	0.066384	0.28139	0.113	0.030062	0.013352	0.0040064	0.018871	0.037381	0.065484	0.073562	0.086819	0.083821	0.084717	0.071656	0.051092	0.023499	2
0.083772	0.07189	0.12771	0.15753	0.16943	0.12244	0.16034	0.14849	0.1047	0.10461	0.11594	0.14849	0.1132	0.097503	0.098297	0.13448	0.17253	0.13304	0.12773	0.11053	0.010916	0.019353	0.022983	0.04174	0.20488	0.23055	0.056502	0.024466	0.0089307	0.0036765	0.025253	0.038855	0.065335	0.076097	0.092048	0.086279	0.083502	0.066863	0.062333	0.028914	2
0.10076	0.15696	0.17809	0.14746	0.13973	0.14945	0.089195	0.087854	0.066338	0.087807	0.066182	0.066287	0.11732	0.11059	0.10425	0.097621	0.14573	0.19639	0.1574	0.12793	0.0026693	0.013387	0.0317	0.055906	0.065785	0.089797	0.25305	0.052818	0.022264	0.0056584	0.0064406	0.040778	0.076805	0.07753	0.088985	0.086813	0.084467	0.063526	0.061258	0.010006	2
0.10615	0.15939	0.18256	0.16351	0.14669	0.13636	0.066161	0.055542	0.06433	0.088258	0.084806	0.064356	0.066298	0.11562	0.11278	0.10504	0.097115	0.14544	0.20478	0.16395	0.0064022	0.0096942	0.027669	0.057138	0.072526	0.060734	0.16405	0.15012	0.021739	0.0068106	0.0057321	0.026107	0.081704	0.079663	0.093389	0.085138	0.079593	0.067537	0.044332	0.013303	2
0.086392	0.12394	0.15821	0.17967	0.15408	0.14137	0.12125	0.074387	0.058402	0.073845	0.090402	0.070041	0.093564	0.13384	0.10691	0.099548	0.10005	0.16007	0.18378	0.12819	0.0035163	0.01523	0.039718	0.049473	0.062984	0.10608	0.23965	0.043563	0.020156	0.0031664	0.011686	0.033322	0.07802	0.077458	0.088587	0.084346	0.079825	0.07254	0.044539	0.013902	2
0.13261	0.11202	0.10339	0.10534	0.16744	0.1468	0.12847	0.13327	0.059386	0.039394	0.098542	0.091384	0.14965	0.15555	0.12071	0.17132	0.15756	0.097109	0.041864	0.046829	0.0066068	0.038951	0.071968	0.077487	0.087949	0.074405	0.079373	0.063464	0.041777	0.01346	0.0028614	0.010942	0.024561	0.13209	0.25224	0.075867	0.035535	0.018139	0.0096135	0.0035671	2
0.12832	0.11406	0.10221	0.1035	0.17512	0.15533	0.12892	0.14529	0.077122	0.042095	0.1008	0.10002	0.096195	0.17353	0.13597	0.1287	0.17298	0.14505	0.075787	0.038987	0.0076645	0.042043	0.074056	0.078922	0.088535	0.079276	0.076243	0.06927	0.053274	0.014343	0.0030525	0.011149	0.030972	0.060829	0.29275	0.10881	0.039867	0.021815	0.0091938	0.0035994	2
0.12509	0.14634	0.13122	0.10878	0.097861	0.11352	0.16644	0.13958	0.11683	0.10817	0.10743	0.11084	0.1756	0.13075	0.1483	0.17458	0.1559	0.087941	0.078801	0.094825	0.024401	0.061896	0.070068	0.083402	0.076943	0.09024	0.079374	0.063272	0.042337	0.033058	0.0088104	0.017391	0.02499	0.045319	0.26168	0.19039	0.047843	0.021765	0.011075	0.0038188	2
0.11455	0.11064	0.10503	0.19406	0.168	0.1283	0.15074	0.11596	0.056185	0.048889	0.13348	0.098886	0.099919	0.11928	0.17468	0.12974	0.1304	0.15998	0.092661	0.05267	0.01036	0.034662	0.056791	0.10038	0.086026	0.091538	0.071393	0.072802	0.056093	0.014675	0.0032162	0.020985	0.040088	0.063731	0.28337	0.1025	0.041538	0.022227	0.009332	0.005371	2
0.13921	0.14213	0.11184	0.10628	0.099354	0.16475	0.15014	0.12549	0.1319	0.068045	0.11076	0.097363	0.17108	0.14513	0.12398	0.17355	0.16103	0.11649	0.064847	0.07638	0.018307	0.057818	0.067393	0.084298	0.082935	0.087281	0.077382	0.068346	0.045493	0.026391	0.011067	0.014148	0.024673	0.049364	0.28082	0.15719	0.043369	0.020909	0.010327	0.0035896	2
0.16684	0.12215	0.18759	0.32503	0.34193	0.27951	0.2262	0.23539	0.22277	0.19199	0.17444	0.2054	0.31016	0.26319	0.22753	0.24886	0.18448	0.19307	0.21783	0.25813	0.036985	0.084811	0.080415	0.14933	0.23573	0.21607	0.14169	0.099416	0.074099	0.026622	0.023009	0.057865	0.04267	0.15498	0.17412	0.33517	0.25987	0.050608	0.039223	0.016692	2
0.14066	0.11517	0.19292	0.34816	0.31828	0.27136	0.22659	0.20834	0.23998	0.16052	0.15351	0.19265	0.28551	0.28515	0.20499	0.27579	0.19233	0.1814	0.22436	0.23447	0.028873	0.088182	0.082168	0.12367	0.22133	0.21352	0.16001	0.099176	0.076708	0.016784	0.020788	0.046594	0.043587	0.15685	0.17649	0.31909	0.24456	0.051594	0.040228	0.014405	2
0.15445	0.12371	0.18552	0.33025	0.32748	0.27862	0.22464	0.22792	0.22502	0.17979	0.16644	0.19587	0.30167	0.26639	0.21863	0.25728	0.18581	0.19192	0.21846	0.24494	0.034104	0.085401	0.077232	0.13695	0.23858	0.21519	0.14381	0.099339	0.074385	0.022657	0.022197	0.053928	0.043495	0.15358	0.17283	0.3276	0.2542	0.051338	0.039044	0.015968	2
0.16485	0.11618	0.18129	0.32149	0.34142	0.27652	0.22801	0.24064	0.22338	0.19498	0.16902	0.2001	0.30561	0.27641	0.22094	0.25947	0.18918	0.19009	0.21702	0.24542	0.036665	0.086478	0.080389	0.14292	0.23801	0.21732	0.14601	0.10021	0.070462	0.021962	0.023549	0.054906	0.045225	0.15036	0.17255	0.31851	0.27219	0.052849	0.0371	0.016698	2
0.21354	0.18075	0.20182	0.33448	0.34306	0.27938	0.22757	0.23442	0.20504	0.15998	0.21334	0.31585	0.25951	0.23419	0.24135	0.17627	0.19792	0.21397	0.26927	0.24443	0.03822	0.072591	0.11239	0.18104	0.2079	0.2036	0.11972	0.105	0.082321	0.067328	0.017928	0.052291	0.081327	0.15309	0.22815	0.43302	0.12358	0.041806	0.045151	0.014603	2
0.16737	0.15079	0.13198	0.20689	0.13967	0.20736	0.18674	0.24079	0.16054	0.10894	0.13417	0.19776	0.17103	0.1364	0.20683	0.16263	0.13662	0.11902	0.25956	0.16936	0.031184	0.069234	0.10473	0.094824	0.10727	0.13092	0.092763	0.092938	0.077646	0.046204	0.0044004	0.023198	0.046088	0.069463	0.21489	0.32283	0.088419	0.046923	0.022063	0.0082862	2
0.093373	0.079251	0.068409	0.16179	0.14585	0.20027	0.2056	0.25953	0.20561	0.21267	0.18008	0.16817	0.13944	0.19567	0.17599	0.13819	0.21066	0.16175	0.12699	0.1289	0.049334	0.081532	0.10047	0.13004	0.10498	0.10672	0.11955	0.075605	0.03899	0.0067481	0.0063448	0.018477	0.047781	0.076077	0.11177	0.23354	0.22855	0.060409	0.024445	0.0085008	2
0.15	0.1269	0.20273	0.14035	0.19309	0.18267	0.24376	0.1965	0.13263	0.08469	0.13991	0.18208	0.17374	0.14884	0.16306	0.17193	0.16739	0.10084	0.2143	0.19767	0.018635	0.076276	0.085841	0.11673	0.097143	0.11707	0.10556	0.079101	0.075176	0.050368	0.0024968	0.014905	0.046797	0.091012	0.24289	0.28723	0.067079	0.041528	0.022775	0.009371	2
0.13259	0.12082	0.17888	0.15317	0.19165	0.19516	0.2394	0.21921	0.16206	0.10701	0.16913	0.14617	0.19961	0.15983	0.13466	0.20064	0.16463	0.11972	0.14001	0.24858	0.028024	0.079092	0.096959	0.12021	0.096713	0.11181	0.11038	0.074858	0.074422	0.04976	0.0048643	0.013885	0.043047	0.076733	0.21827	0.30938	0.11167	0.040862	0.02258	0.0092394	2
0.1461	0.16108	0.14176	0.14922	0.19295	0.1576	0.19175	0.20619	0.22195	0.15959	0.11405	0.18617	0.17404	0.1491	0.21086	0.16346	0.14613	0.11422	0.25921	0.20709	0.036838	0.069511	0.10849	0.085165	0.11304	0.1291	0.10976	0.087359	0.075511	0.044696	0.0056029	0.025633	0.046357	0.061651	0.14018	0.32014	0.1762	0.045484	0.030462	0.0079012	2
0.092666	0.12287	0.14551	0.17206	0.18028	0.1877	0.16942	0.19209	0.19516	0.30114	0.2376	0.20065	0.22248	0.15836	0.16224	0.22685	0.20331	0.18675	0.11875	0.061879	0.0036928	0.038418	0.026173	0.28892	0.34048	0.078489	0.049634	0.032457	0.014898	0.0029294	0.039207	0.074519	0.094888	0.098053	0.10341	0.10283	0.14084	0.11864	0.090668	0.025184	2
0.15899	0.16229	0.17205	0.19294	0.17211	0.19091	0.18752	0.23835	0.30035	0.16559	0.16878	0.19477	0.23779	0.16911	0.17299	0.22075	0.22052	0.22543	0.21904	0.11472	0.0062246	0.018831	0.053957	0.057451	0.44953	0.27274	0.044253	0.042901	0.018081	0.0071281	0.05073	0.076875	0.090718	0.10525	0.096058	0.138	0.13978	0.10906	0.11317	0.043187	2
0.10986	0.1394	0.16036	0.19473	0.16558	0.19324	0.18637	0.28429	0.28176	0.1838	0.19038	0.23806	0.1635	0.17477	0.22593	0.22486	0.22489	0.22819	0.13833	0.10318	0.0053728	0.037868	0.051295	0.13717	0.48267	0.13441	0.038055	0.044798	0.017672	0.0076043	0.032263	0.079454	0.093014	0.091159	0.12377	0.15572	0.11943	0.12565	0.08834	0.03963	2
0.069157	0.096761	0.11807	0.1547	0.17718	0.18593	0.16673	0.19372	0.19377	0.29709	0.22757	0.2282	0.17164	0.1582	0.20525	0.20796	0.18503	0.15487	0.07223	0.050087	0.0096992	0.037553	0.051506	0.39925	0.18521	0.055859	0.050706	0.025642	0.01299	0.0052063	0.028193	0.058689	0.091875	0.10103	0.098033	0.12285	0.12955	0.10719	0.078067	0.010389	2
0.07399	0.10789	0.13061	0.19656	0.16871	0.19269	0.18405	0.26576	0.30798	0.2026	0.19899	0.20614	0.16241	0.19127	0.23881	0.21288	0.24006	0.17575	0.11014	0.097769	0.0060644	0.047496	0.042215	0.24414	0.37086	0.09352	0.042283	0.038312	0.018692	0.0036083	0.013602	0.071936	0.093705	0.089655	0.12952	0.15276	0.12047	0.12475	0.082535	0.034499	2
0.08	0.14823	0.25048	0.20812	0.20379	0.18952	0.19357	0.23382	0.19559	0.11898	0.24604	0.20906	0.1537	0.17092	0.20937	0.19329	0.14342	0.13617	0.18012	0.16029	0.0032855	0.029079	0.057605	0.10041	0.31702	0.30625	0.036533	0.02043	0.012881	0.012954	0.036286	0.093159	0.094859	0.11234	0.11041	0.13112	0.13175	0.073048	0.070098	0.046313	2
0.04597	0.073679	0.17186	0.18745	0.19727	0.1837	0.20053	0.22523	0.20901	0.20286	0.17784	0.15895	0.18819	0.22744	0.15457	0.1381	0.15755	0.18769	0.1638	0.14318	0.008218	0.038654	0.033469	0.14859	0.35493	0.19506	0.03064	0.018405	0.025295	0.0057404	0.0068785	0.062187	0.1008	0.089467	0.13416	0.13917	0.095168	0.076912	0.092025	0.056253	2
0.053106	0.050318	0.16472	0.1633	0.2129	0.19111	0.17629	0.2231	0.23555	0.19069	0.19411	0.14727	0.17447	0.2156	0.18364	0.13912	0.14484	0.17991	0.14462	0.12742	0.011028	0.042643	0.034399	0.17202	0.36729	0.12329	0.028441	0.020647	0.025243	0.0054769	0.0062167	0.046228	0.098203	0.10033	0.12317	0.12826	0.12005	0.068943	0.081817	0.049396	2
0.068581	0.11931	0.23185	0.20818	0.20615	0.19291	0.19335	0.23705	0.21687	0.13611	0.24576	0.18727	0.15293	0.18455	0.22229	0.16884	0.13865	0.15568	0.18303	0.1504	0.0034821	0.035441	0.054653	0.12676	0.3086	0.28048	0.033286	0.019229	0.015119	0.011266	0.028015	0.081901	0.098273	0.11253	0.11411	0.12994	0.13168	0.066926	0.074178	0.053694	2
0.1175	0.19798	0.22752	0.21138	0.18916	0.18751	0.2242	0.20937	0.14838	0.1088	0.2337	0.21721	0.16252	0.16691	0.20929	0.20274	0.1421	0.13967	0.17379	0.17982	0.0036794	0.023024	0.05831	0.06045	0.28393	0.37372	0.074161	0.021045	0.010458	0.01094	0.053659	0.094253	0.098078	0.11107	0.10903	0.12997	0.13394	0.067585	0.072312	0.04136	2
0.18214	0.164	0.1342	0.12506	0.14275	0.196	0.14144	0.14735	0.13308	0.094838	0.083379	0.20168	0.14716	0.16181	0.1523	0.10792	0.15784	0.1614	0.15765	0.13216	0.0015143	0.0067528	0.0089466	0.017005	0.28296	0.32734	0.038241	0.026961	0.012995	0.0070118	0.04022	0.090265	0.08027	0.080936	0.088517	0.075306	0.082055	0.075093	0.071739	0.043735	2
0.15373	0.18032	0.16617	0.14022	0.12124	0.13771	0.1899	0.13948	0.14641	0.11716	0.080608	0.20549	0.18518	0.1583	0.16474	0.1341	0.14361	0.17967	0.13951	0.1022	0.0022034	0.0075549	0.0090086	0.027807	0.38034	0.2149	0.041647	0.026421	0.021832	0.0093673	0.027925	0.082749	0.097307	0.094486	0.098739	0.082428	0.072875	0.076867	0.069717	0.041553	2
0.15575	0.19108	0.14611	0.11936	0.13964	0.15492	0.1744	0.14742	0.14276	0.11738	0.10807	0.22427	0.14537	0.16222	0.15553	0.12026	0.164	0.16701	0.14637	0.10016	0.0016942	0.0062694	0.0086308	0.028441	0.38498	0.21348	0.039574	0.026899	0.019908	0.0070568	0.039023	0.089048	0.088363	0.09181	0.094408	0.075844	0.080388	0.077527	0.069364	0.040525	2
0.18028	0.14747	0.11745	0.13729	0.15768	0.17641	0.14688	0.1474	0.14654	0.099492	0.14995	0.16376	0.14833	0.16089	0.11914	0.13035	0.17393	0.13727	0.15576	0.11071	0.0016959	0.0051702	0.0079187	0.019489	0.35468	0.25683	0.038094	0.019667	0.010937	0.0046416	0.056563	0.082042	0.074467	0.078608	0.079259	0.082339	0.080789	0.076179	0.074021	0.0413	2
0.12923	0.17585	0.16871	0.13852	0.12389	0.14264	0.18873	0.14004	0.14784	0.14544	0.17071	0.21837	0.14241	0.16735	0.14265	0.13133	0.18322	0.14592	0.11695	0.087586	0.0017354	0.0058784	0.010415	0.11883	0.43289	0.090203	0.041358	0.028935	0.021183	0.0078075	0.037292	0.092585	0.092081	0.092839	0.098645	0.076796	0.080603	0.077724	0.069245	0.035294	2
0.029902	0.028268	0.032097	0.05851	0.054481	0.04254	0.06722	0.043998	0.069163	0.044614	0.038365	0.022706	0.051424	0.037569	0.043421	0.042157	0.050759	0.060077	0.063136	0.059999	0.0033176	0.011851	0.014338	0.011963	0.051705	0.092016	0.030803	0.013837	0.0063711	0.0012958	0.0030964	0.011235	0.020617	0.030993	0.031256	0.028163	0.041772	0.02342	0.026443	0.018328	2
0.02639	0.030796	0.057	0.060173	0.04607	0.064572	0.04061	0.064534	0.073483	0.035031	0.018636	0.031936	0.043497	0.039578	0.043069	0.052419	0.058878	0.068273	0.058724	0.079718	0.0016742	0.0059811	0.011876	0.013975	0.043314	0.11068	0.032183	0.018652	0.008508	0.0013782	0.0014113	0.012699	0.023193	0.028462	0.024969	0.045067	0.030056	0.031846	0.035184	0.015097	2
0.03217	0.046039	0.02967	0.04457	0.064568	0.071574	0.068319	0.054833	0.042355	0.091846	0.059558	0.033231	0.042525	0.045693	0.050015	0.065047	0.063871	0.060309	0.05705	0.070382	0.0016782	0.0054357	0.0079651	0.076196	0.086454	0.031948	0.031736	0.015029	0.0076222	0.011466	0.0091149	0.014884	0.020677	0.024486	0.024571	0.057724	0.03088	0.047052	0.036892	0.0090369	2
0.036217	0.03167	0.052734	0.065116	0.061029	0.070404	0.041789	0.056713	0.084545	0.055438	0.034218	0.043171	0.039602	0.041403	0.052764	0.06012	0.065838	0.057971	0.079423	0.078001	0.0018808	0.0061748	0.012128	0.017207	0.10738	0.066237	0.025389	0.026196	0.007416	0.0059248	0.0038274	0.019667	0.022211	0.025021	0.034829	0.044971	0.035268	0.04216	0.031736	0.016188	2
0.030091	0.032017	0.053878	0.062818	0.054572	0.06463	0.0411	0.056183	0.087484	0.051945	0.023912	0.048045	0.035186	0.043021	0.04883	0.056101	0.067354	0.061189	0.070494	0.077679	0.0021193	0.0055949	0.012388	0.013522	0.083444	0.092952	0.025451	0.02133	0.0068006	0.0023747	0.002813	0.017876	0.022684	0.025765	0.028938	0.04721	0.030146	0.039072	0.0335	0.017713	2
0.026098	0.0199	0.0289	0.03098	0.035384	0.02557	0.043696	0.048374	0.029981	0.028393	0.028613	0.02127	0.03137	0.04771	0.030015	0.041643	0.046968	0.037366	0.017701	0.015099	0.0011612	0.0037014	0.0081845	0.019957	0.077663	0.021321	0.012301	0.0056374	0.0045333	0.0020802	0.0065329	0.010795	0.013484	0.021694	0.021074	0.021556	0.030924	0.017528	0.012757	0.0028558	2
0.029611	0.020697	0.028391	0.03188	0.033084	0.026499	0.050441	0.047278	0.028912	0.027768	0.031984	0.018819	0.023692	0.045083	0.036397	0.036459	0.04851	0.045047	0.021308	0.01707	0.0012972	0.0039326	0.007117	0.018328	0.067597	0.042481	0.012681	0.0056385	0.0037842	0.0022933	0.0079582	0.0096152	0.013555	0.019997	0.022634	0.020577	0.032062	0.018909	0.012933	0.0040739	2
0.03041	0.024596	0.028031	0.030192	0.038804	0.025827	0.041307	0.055394	0.032138	0.025889	0.023757	0.031097	0.025463	0.020402	0.03298	0.047124	0.030864	0.043735	0.049341	0.032023	0.0018172	0.0058094	0.0067368	0.013746	0.026305	0.080115	0.0157	0.0096448	0.0037075	0.0014409	0.0040348	0.012771	0.01485	0.016734	0.024892	0.021574	0.019304	0.029754	0.015959	0.0075479	2
0.029595	0.023342	0.028356	0.031215	0.037381	0.027047	0.043469	0.051808	0.02977	0.02689	0.033228	0.021425	0.022563	0.042155	0.04316	0.032915	0.047627	0.046718	0.02548	0.016356	0.0014965	0.004208	0.0072736	0.018072	0.067742	0.043135	0.013339	0.0063665	0.003821	0.0026372	0.0076135	0.0095979	0.015034	0.017875	0.027662	0.019389	0.029481	0.02197	0.011964	0.0051572	2
0.023619	0.027417	0.032433	0.038791	0.025975	0.045313	0.050248	0.029897	0.025585	0.029444	0.021388	0.024926	0.02	0.024653	0.046574	0.033963	0.037827	0.048155	0.047785	0.022783	0.001597	0.0040425	0.0075419	0.011792	0.026095	0.078445	0.019375	0.0083702	0.0033732	0.0012393	0.0047608	0.0097533	0.013596	0.021013	0.022462	0.019727	0.031058	0.020779	0.01326	0.0075047	2
0.021483	0.025615	0.039084	0.02642	0.041226	0.05181	0.036223	0.025971	0.031411	0.0532	0.022928	0.03983	0.04568	0.03497	0.048484	0.063029	0.038636	0.031897	0.020915	0.012062	0.0010565	0.006888	0.010884	0.028039	0.083181	0.024746	0.011045	0.0055903	0.0042707	0.0015052	0.0050377	0.011259	0.022517	0.014764	0.030813	0.031276	0.019427	0.025239	0.013611	0.0033883	2
0.016694	0.028105	0.03229	0.033534	0.027913	0.04999	0.046685	0.029437	0.028895	0.041417	0.019936	0.02293	0.039252	0.042828	0.033088	0.046523	0.052526	0.037353	0.025364	0.016758	0.0013459	0.0048526	0.0081781	0.018177	0.064051	0.048248	0.01139	0.0060127	0.0035767	0.0011147	0.0034301	0.010107	0.016685	0.021525	0.01835	0.03285	0.024735	0.01639	0.016564	0.0057269	2
0.023883	0.025871	0.03694	0.026152	0.046338	0.049391	0.031439	0.027098	0.034782	0.055335	0.02292	0.039	0.044115	0.033907	0.04895	0.064763	0.039462	0.033517	0.022458	0.013293	0.0010977	0.0073675	0.010151	0.0271	0.078655	0.033629	0.011133	0.0056477	0.0046058	0.0015313	0.0053	0.012526	0.019843	0.01556	0.032733	0.030204	0.019429	0.025823	0.014276	0.0030946	2
0.016668	0.017177	0.027903	0.031168	0.033131	0.02901	0.050495	0.043476	0.028029	0.03021	0.021585	0.030404	0.04838	0.028578	0.041907	0.048065	0.041497	0.020344	0.016819	0.012779	0.0013721	0.0040905	0.0085424	0.037377	0.064676	0.016452	0.010543	0.0057701	0.0044329	0.0013767	0.0019616	0.010688	0.01446	0.023654	0.017318	0.031693	0.025065	0.015982	0.012584	0.0012712	2
0.0181	0.014746	0.026362	0.025672	0.041135	0.026554	0.044115	0.050172	0.030236	0.025934	0.021338	0.030385	0.051641	0.028797	0.042119	0.047819	0.036329	0.017457	0.017661	0.011959	0.0010388	0.0037167	0.010411	0.044433	0.053552	0.016322	0.0099538	0.0062494	0.0046758	0.0012781	0.0015322	0.011097	0.01268	0.025918	0.017251	0.028108	0.027581	0.015442	0.010627	0.0011297	2
0.043039	0.062425	0.076657	0.076363	0.047005	0.045954	0.087055	0.054376	0.043388	0.029963	0.027877	0.039686	0.041999	0.053203	0.056311	0.066787	0.060776	0.080903	0.079619	0.059266	0.0015831	0.0061234	0.0086683	0.012006	0.067282	0.10725	0.025548	0.026745	0.024297	0.0021941	0.0082077	0.018084	0.017689	0.03876	0.03359	0.055402	0.052553	0.030501	0.017537	0.0099083	2
0.045992	0.072928	0.072178	0.072832	0.040865	0.0742	0.073015	0.052844	0.036117	0.034527	0.041162	0.045928	0.054982	0.063631	0.065662	0.063978	0.082087	0.073494	0.053252	0.0287	0.0028805	0.0056936	0.010057	0.014226	0.12113	0.055815	0.027239	0.03294	0.012655	0.0031932	0.011646	0.01547	0.032204	0.034686	0.045595	0.059796	0.038532	0.026385	0.01261	0.0073389	2
0.041744	0.067689	0.072932	0.073877	0.041056	0.06211	0.081532	0.052163	0.038584	0.031501	0.022642	0.039387	0.04535	0.054764	0.063066	0.067967	0.06287	0.082256	0.072412	0.050666	0.0017064	0.006483	0.008772	0.012271	0.066628	0.10581	0.025928	0.026672	0.021376	0.0024597	0.0060624	0.016432	0.019932	0.042645	0.034297	0.05994	0.04746	0.027006	0.015334	0.010547	2
0.057703	0.077392	0.069712	0.06403	0.038553	0.085182	0.062491	0.051813	0.031508	0.023587	0.023353	0.033439	0.04205	0.054259	0.063404	0.070261	0.059137	0.08048	0.077464	0.058857	0.0011562	0.006383	0.0089094	0.013143	0.03261	0.12834	0.032696	0.024646	0.027613	0.0040474	0.0079677	0.016022	0.021313	0.042304	0.035839	0.062962	0.044843	0.026292	0.014098	0.0090765	2
0.045535	0.076792	0.071152	0.07088	0.041575	0.084183	0.070195	0.052649	0.033206	0.033082	0.040101	0.045332	0.055672	0.065138	0.066991	0.065726	0.083924	0.073202	0.052063	0.029227	0.0029644	0.0055567	0.010036	0.013605	0.11957	0.059067	0.027289	0.033245	0.013641	0.0029812	0.010754	0.015111	0.033488	0.033319	0.048811	0.060959	0.038723	0.025203	0.012257	0.0069983	2
0.045969	0.089487	0.057151	0.050873	0.029864	0.027972	0.024736	0.025866	0.027392	0.032433	0.041888	0.046617	0.056858	0.066246	0.03563	0.029691	0.028996	0.043618	0.040646	0.021761	0.0016487	0.004385	0.0074399	0.0092006	0.050336	0.096634	0.01502	0.011784	0.0060845	0.002063	0.011593	0.029458	0.035093	0.03148	0.02033	0.02395	0.016864	0.014888	0.015116	0.0067203	2
0.086352	0.061702	0.059905	0.032273	0.029431	0.026509	0.026518	0.027986	0.034234	0.030653	0.029464	0.041152	0.048716	0.069627	0.046735	0.031868	0.032215	0.037029	0.048485	0.034099	0.0011863	0.0039311	0.0087966	0.013158	0.01868	0.096628	0.050465	0.011735	0.0068217	0.0020632	0.010429	0.032832	0.033702	0.02814	0.021484	0.023649	0.016363	0.016836	0.017257	0.0088521	2
0.077583	0.055247	0.048137	0.029384	0.027837	0.022568	0.025592	0.027588	0.03462	0.039517	0.04082	0.053861	0.062894	0.032668	0.039689	0.029551	0.043631	0.042386	0.030531	0.014621	0.0014568	0.0038582	0.012945	0.0082841	0.052475	0.085059	0.012199	0.0096007	0.0050205	0.0022336	0.019026	0.031333	0.02393	0.016597	0.02408	0.020725	0.01894	0.02289	0.011906	0.0056811	2
0.060408	0.08027	0.053751	0.041354	0.029573	0.026421	0.024464	0.025433	0.032207	0.033974	0.04109	0.042815	0.064128	0.058244	0.02923	0.03237	0.033059	0.047178	0.03813	0.022731	0.0012102	0.0041423	0.0079449	0.0089163	0.050502	0.094248	0.014946	0.012192	0.0054039	0.0021543	0.013269	0.03196	0.031484	0.025535	0.020933	0.023823	0.016994	0.015522	0.015494	0.0080209	2
0.089231	0.05663	0.052099	0.029509	0.02899	0.025991	0.02726	0.028914	0.031494	0.030594	0.026803	0.036169	0.042794	0.063298	0.052449	0.030084	0.038723	0.03273	0.046517	0.03596	0.001914	0.0043049	0.0086867	0.016327	0.012692	0.069969	0.068139	0.010014	0.0073	0.0019546	0.007788	0.031015	0.032306	0.025819	0.02187	0.023621	0.016119	0.017922	0.018645	0.006867	2
0.015843	0.058525	0.039901	0.06038	0.057587	0.023414	0.038575	0.023186	0.032819	0.034605	0.010549	0.011741	0.044894	0.085148	0.044255	0.046294	0.052435	0.040659	0.02666	0.023089	0.00085064	0.0081578	0.01123	0.023246	0.033024	0.062211	0.030373	0.0096384	0.0097178	0.0036327	0.0014255	0.0040404	0.032626	0.023112	0.019805	0.05247	0.034534	0.017984	0.0055159	0.0010494	2
0.067968	0.031369	0.071969	0.047276	0.026823	0.035845	0.023764	0.03754	0.034289	0.050112	0.032934	0.062394	0.083841	0.045205	0.044593	0.050588	0.044289	0.026344	0.025691	0.016121	0.016613	0.013503	0.01152	0.021851	0.032931	0.061339	0.034487	0.0087061	0.0095371	0.005863	0.00223	0.02842	0.023593	0.015481	0.060943	0.051986	0.01846	0.0064939	0.005	0.0021396	2
0.020109	0.068177	0.029307	0.076942	0.045386	0.02426	0.037544	0.023459	0.039824	0.033892	0.01185	0.043028	0.084777	0.048745	0.04747	0.052916	0.045615	0.02646	0.024633	0.018978	0.0033042	0.010937	0.013532	0.025971	0.043444	0.055525	0.023243	0.0091213	0.010701	0.0042885	0.0010125	0.020531	0.018002	0.028075	0.028371	0.069608	0.018599	0.011239	0.003666	0.0021031	2
0.058119	0.043407	0.057333	0.056396	0.02543	0.042135	0.022479	0.033987	0.038769	0.048917	0.015483	0.04142	0.080102	0.071218	0.038977	0.050747	0.049829	0.033342	0.024485	0.023425	0.0096754	0.016335	0.012606	0.020388	0.030659	0.056076	0.041765	0.012175	0.0079414	0.0070834	0.0010161	0.025815	0.017947	0.025765	0.033722	0.074027	0.019754	0.010612	0.0045561	0.0026912	2
0.021791	0.061974	0.02891	0.076819	0.037136	0.03393	0.032633	0.025176	0.039691	0.031356	0.013475	0.011173	0.021969	0.065635	0.079719	0.037567	0.048025	0.05068	0.037798	0.0242	0.00059513	0.0092713	0.013651	0.017075	0.027898	0.043598	0.053644	0.020458	0.0071704	0.0024794	0.0017696	0.0038233	0.032399	0.021134	0.023173	0.039763	0.048226	0.017382	0.0062727	0.001628	2
0.040776	0.033747	0.03425	0.036024	0.073948	0.073017	0.054079	0.059792	0.056152	0.043658	0.041966	0.053718	0.042645	0.076602	0.086012	0.065544	0.045299	0.03389	0.035071	0.028023	0.0077259	0.018176	0.035935	0.044701	0.044812	0.039812	0.017886	0.022643	0.012979	0.0082133	0.0018765	0.0043676	0.023041	0.022588	0.053723	0.10503	0.024631	0.0095566	0.0068276	0.00197	2
0.040833	0.029802	0.038464	0.050459	0.077002	0.068275	0.051458	0.060067	0.047765	0.047789	0.046769	0.064313	0.043517	0.076167	0.083936	0.0625	0.04376	0.03447	0.033946	0.02483	0.011339	0.019448	0.029307	0.045454	0.046902	0.038098	0.021221	0.022055	0.012808	0.0070641	0.0011751	0.0064902	0.025781	0.019623	0.073505	0.095442	0.014966	0.0089909	0.0078512	0.0021782	2
0.035685	0.04439	0.029193	0.033355	0.039212	0.06555	0.063383	0.047027	0.057397	0.047356	0.038893	0.037164	0.08262	0.074934	0.064606	0.036067	0.034235	0.033701	0.02903	0.027453	0.0075857	0.025089	0.033298	0.040668	0.039036	0.021491	0.024028	0.017353	0.012245	0.008639	0.0014778	0.004212	0.017291	0.015843	0.081632	0.079196	0.014274	0.0090931	0.007278	0.0016611	2
0.048	0.03313	0.035064	0.035233	0.071546	0.070481	0.051346	0.059249	0.054664	0.042909	0.048798	0.053612	0.044192	0.092243	0.070336	0.062799	0.034949	0.035143	0.031222	0.030471	0.0090952	0.018222	0.03967	0.041723	0.042584	0.03763	0.01839	0.021891	0.012607	0.010429	0.0018296	0.0048764	0.024722	0.01958	0.076431	0.093152	0.014892	0.0090618	0.0073514	0.0021921	2
0.043247	0.036906	0.030603	0.030622	0.055614	0.064234	0.052858	0.053105	0.053759	0.042883	0.046625	0.038814	0.083038	0.074761	0.064432	0.037381	0.034915	0.03178	0.026939	0.022338	0.01055	0.020873	0.033167	0.042131	0.037539	0.025505	0.024152	0.016783	0.011392	0.0079964	0.0014644	0.0053793	0.017705	0.017659	0.099953	0.058205	0.011518	0.0090362	0.0064895	0.0021065	2
0.033196	0.037665	0.050286	0.048822	0.041874	0.042484	0.041422	0.06431	0.065841	0.06552	0.023602	0.049993	0.056313	0.04236	0.036374	0.048267	0.067835	0.048684	0.044474	0.073912	0.0044948	0.02968	0.025028	0.024524	0.033193	0.043786	0.024556	0.032428	0.020847	0.0063626	0.0015722	0.0068189	0.0095388	0.017444	0.031366	0.10113	0.041786	0.01064	0.0083074	0.014831	2
0.032613	0.045669	0.053485	0.041457	0.047587	0.035273	0.061591	0.060034	0.062609	0.039807	0.023055	0.047453	0.057239	0.043169	0.034806	0.043048	0.067706	0.054618	0.038345	0.067439	0.0039028	0.018807	0.033599	0.025566	0.030557	0.039431	0.030709	0.021503	0.029432	0.0068669	0.0024257	0.0065055	0.0083959	0.016481	0.04677	0.1039	0.026708	0.012633	0.011772	0.0087959	2
0.038692	0.048618	0.050703	0.040824	0.046659	0.037169	0.064306	0.064063	0.083078	0.043842	0.04911	0.059488	0.045528	0.034846	0.043033	0.067814	0.054766	0.035041	0.061652	0.065333	0.0065359	0.031913	0.026938	0.025335	0.034507	0.051209	0.02585	0.028855	0.017492	0.0091035	0.0017351	0.0059275	0.009923	0.022353	0.085089	0.071684	0.017798	0.013777	0.019839	0.01136	2
0.028656	0.033015	0.041536	0.042309	0.048694	0.031738	0.060919	0.059323	0.050199	0.04082	0.016092	0.0219	0.050787	0.05969	0.045462	0.035039	0.043461	0.06904	0.05401	0.038621	0.0018592	0.011366	0.034942	0.02899	0.03088	0.032924	0.028823	0.020248	0.024039	0.0039191	0.0023317	0.0065181	0.009626	0.012952	0.024563	0.080285	0.05699	0.015642	0.008481	0.0019814	2
0.0305	0.040767	0.053688	0.047807	0.043757	0.041099	0.048338	0.061384	0.065054	0.056329	0.021054	0.047039	0.058438	0.043431	0.033895	0.045374	0.068539	0.056176	0.040114	0.071478	0.0036304	0.025713	0.029598	0.024932	0.03288	0.04074	0.026788	0.028305	0.025696	0.0066116	0.0020252	0.0066129	0.0090779	0.015717	0.032087	0.10207	0.042278	0.012416	0.0090236	0.010288	2
0.018817	0.03106	0.054112	0.05252	0.038861	0.039094	0.039438	0.03576	0.031073	0.048204	0.028049	0.028857	0.021672	0.032719	0.047545	0.033578	0.03732	0.06877	0.054877	0.034246	0.0074914	0.012359	0.019563	0.021907	0.028094	0.019559	0.029558	0.033618	0.015951	0.0056784	0.001648	0.0053731	0.0063233	0.011421	0.023999	0.092359	0.029044	0.013971	0.006565	0.0023734	2
0.015444	0.021538	0.030536	0.049605	0.052216	0.04242	0.037809	0.042559	0.03547	0.031932	0.020805	0.012659	0.021477	0.03256	0.042559	0.031201	0.051912	0.065795	0.041739	0.03575	0.0019246	0.010953	0.019528	0.021423	0.020395	0.028396	0.038081	0.020261	0.013791	0.0037836	0.0011286	0.0040091	0.0068116	0.010123	0.017264	0.067346	0.049857	0.012291	0.0070557	0.0019223	2
0.016847	0.024314	0.041199	0.057065	0.051558	0.038322	0.039967	0.034162	0.035567	0.02828	0.02118	0.01431	0.023603	0.034636	0.039926	0.029731	0.057029	0.065715	0.041829	0.037514	0.0024564	0.010658	0.018496	0.021039	0.02124	0.026649	0.040023	0.021673	0.015901	0.0052909	0.0012117	0.0045386	0.0059909	0.010786	0.019259	0.083505	0.036086	0.012325	0.0067698	0.0017405	2
0.02146	0.030806	0.049933	0.057231	0.048711	0.0351	0.044588	0.031179	0.036032	0.033302	0.021353	0.018808	0.030773	0.044618	0.034292	0.038377	0.06969	0.056597	0.035246	0.038966	0.0053853	0.011819	0.018865	0.022475	0.021233	0.028806	0.04056	0.020694	0.017036	0.0078154	0.0010669	0.004281	0.0051587	0.0117	0.035739	0.095601	0.023299	0.011783	0.0060236	0.0016813	2
0.017453	0.026558	0.041234	0.057209	0.051729	0.037945	0.039123	0.03558	0.035805	0.027316	0.01962	0.013802	0.025608	0.038524	0.038071	0.03005	0.060356	0.064898	0.038982	0.038174	0.0024429	0.010614	0.018862	0.021234	0.02037	0.027886	0.040563	0.021189	0.015838	0.0058514	0.0012109	0.0042151	0.006075	0.01086	0.02008	0.087068	0.03376	0.012028	0.0067191	0.0016241	2
0.032503	0.053951	0.081082	0.076614	0.056679	0.041984	0.065372	0.055757	0.054036	0.076444	0.023116	0.057615	0.080812	0.061378	0.031019	0.04313	0.10396	0.073712	0.050157	0.067965	0.011528	0.037677	0.029939	0.031672	0.019729	0.035045	0.055989	0.034194	0.027756	0.014699	0.001282	0.0039437	0.0060347	0.013251	0.067268	0.15635	0.030823	0.0087447	0.0080492	0.0028825	2
0.041142	0.059874	0.083687	0.075205	0.054537	0.040345	0.072662	0.0573	0.059966	0.076724	0.05952	0.084338	0.0651	0.032924	0.046001	0.10659	0.075391	0.051293	0.070715	0.038671	0.027291	0.032503	0.030592	0.025861	0.022864	0.051948	0.060309	0.026721	0.030601	0.0081243	0.0012303	0.0029081	0.0080111	0.021204	0.14999	0.09389	0.014457	0.011053	0.011858	0.0035098	2
0.039943	0.068016	0.085715	0.074416	0.046847	0.048312	0.067551	0.048795	0.061583	0.075848	0.020131	0.062071	0.085042	0.068997	0.03581	0.03416	0.10493	0.083259	0.043763	0.066696	0.0084025	0.040852	0.032071	0.033886	0.025176	0.028019	0.050895	0.044198	0.023264	0.020431	0.0011905	0.0039825	0.0055471	0.014156	0.079654	0.15789	0.028545	0.0082852	0.0062482	0.0023222	2
0.030285	0.021321	0.041124	0.071526	0.080154	0.06068	0.044883	0.055251	0.058445	0.049018	0.014303	0.015999	0.027889	0.060564	0.054025	0.043328	0.068438	0.10461	0.063344	0.063587	0.0016827	0.017197	0.029624	0.029704	0.020095	0.03823	0.054933	0.037069	0.025202	0.0040936	0.00041093	0.0040565	0.008729	0.015917	0.017239	0.063432	0.12481	0.016263	0.004378	0.00099159	2
0.028308	0.022467	0.03998	0.079394	0.074884	0.055121	0.044853	0.061234	0.053947	0.049662	0.014304	0.016268	0.029382	0.059788	0.057952	0.041617	0.058951	0.10419	0.06974	0.058803	0.001346	0.018463	0.027872	0.0321	0.019261	0.03375	0.053828	0.039412	0.024725	0.0044506	0.00052397	0.0040093	0.008873	0.015898	0.016146	0.067915	0.12138	0.014339	0.0046696	0.0010941	2
0.028058	0.03594	0.045826	0.06948	0.06697	0.058636	0.059423	0.059534	0.07999	0.10018	0.041256	0.042404	0.032895	0.038056	0.045532	0.069495	0.0593	0.081018	0.10011	0.093777	0.020588	0.023865	0.02616	0.036719	0.029596	0.037469	0.035449	0.049511	0.028432	0.012955	0.00094723	0.0026874	0.0069677	0.012599	0.016022	0.085489	0.13932	0.033468	0.0036135	0.0017669	2
0.019325	0.028101	0.044866	0.071997	0.060439	0.065428	0.05776	0.070267	0.093612	0.087842	0.040166	0.05904	0.037796	0.03504	0.039682	0.051943	0.062894	0.069714	0.098905	0.10129	0.019581	0.030254	0.025743	0.031005	0.040179	0.030472	0.039167	0.041482	0.032256	0.0078349	0.0017166	0.0031875	0.0073025	0.010245	0.017046	0.082079	0.13004	0.040408	0.004711	0.0015894	2
0.019117	0.026955	0.031395	0.054319	0.073566	0.05977	0.064063	0.056371	0.076479	0.093792	0.022688	0.03378	0.029846	0.03292	0.038329	0.066167	0.062515	0.073237	0.098373	0.096077	0.010249	0.021689	0.026064	0.036767	0.031025	0.036632	0.036235	0.048192	0.023869	0.0062927	0.00088526	0.0032889	0.005915	0.013701	0.013867	0.038662	0.12177	0.074115	0.0050093	0.0011469	2
0.048879	0.051974	0.076101	0.064608	0.059911	0.059357	0.068304	0.093714	0.075967	0.021971	0.054983	0.034165	0.038896	0.042049	0.064614	0.057287	0.07805	0.099412	0.087161	0.056216	0.012146	0.02589	0.025532	0.034871	0.033802	0.033325	0.045039	0.047846	0.031225	0.016853	0.00097311	0.0034862	0.0072876	0.010022	0.077204	0.15088	0.041045	0.0062079	0.010627	0.0015565	2
0.057345	0.043986	0.055342	0.076117	0.058959	0.062916	0.057551	0.085551	0.080343	0.033789	0.035553	0.03371	0.040175	0.054128	0.059566	0.071577	0.096134	0.098255	0.079538	0.046591	0.011577	0.020987	0.028175	0.036231	0.029364	0.048792	0.044558	0.041509	0.026316	0.016893	0.00062965	0.0022089	0.0070791	0.010663	0.072044	0.14951	0.041593	0.0064876	0.013026	0.0015117	2
0.052793	0.056203	0.064395	0.057227	0.081743	0.099986	0.083069	0.042554	0.02499	0.018394	0.054518	0.062463	0.05332	0.039116	0.038877	0.041831	0.066307	0.057792	0.079386	0.078059	0.0054327	0.017809	0.03221	0.035897	0.035062	0.038317	0.036972	0.026186	0.034033	0.025148	0.0015288	0.0066099	0.0073803	0.033131	0.08646	0.11948	0.017529	0.0073116	0.005398	0.0030694	2
0.016691	0.02791	0.047018	0.056581	0.064765	0.09854	0.10113	0.055996	0.039871	0.038917	0.042026	0.053596	0.061998	0.054955	0.040395	0.039816	0.041871	0.066592	0.058735	0.076902	0.013836	0.018723	0.029264	0.0395	0.033965	0.035159	0.040144	0.025487	0.028841	0.0069191	0.00081738	0.0039191	0.0095883	0.010683	0.059979	0.10165	0.072328	0.0083923	0.0053653	0.0021454	2
0.017491	0.031858	0.049067	0.05743	0.080208	0.10229	0.087242	0.045758	0.041191	0.03575	0.04416	0.052946	0.060179	0.05595	0.039146	0.040272	0.042583	0.06487	0.060655	0.075366	0.012445	0.020319	0.024783	0.038881	0.036172	0.034394	0.038795	0.026539	0.02778	0.0082765	0.00089382	0.0043528	0.0099483	0.010955	0.071935	0.10182	0.057572	0.0072234	0.0055208	0.0028211	2
0.01812	0.02426	0.042803	0.07064	0.10255	0.088992	0.047784	0.038425	0.044656	0.040421	0.042291	0.049014	0.052411	0.058341	0.051422	0.036279	0.039339	0.045316	0.068238	0.066594	0.011519	0.019186	0.020739	0.028266	0.045166	0.038435	0.032358	0.036551	0.020041	0.0042578	0.0032737	0.0043557	0.0095683	0.010894	0.076704	0.090224	0.045015	0.006314	0.0054111	0.006999	2
0.01642	0.017297	0.023082	0.043796	0.072008	0.10192	0.091098	0.048761	0.039282	0.042682	0.028248	0.04563	0.05152	0.061915	0.054125	0.039145	0.039776	0.043793	0.066944	0.056998	0.00973	0.020096	0.02143	0.036737	0.039417	0.034005	0.037413	0.031579	0.011355	0.0018667	0.0029762	0.003894	0.0094224	0.010794	0.029974	0.09533	0.069152	0.014706	0.0046412	0.0023481	2
0.074993	0.07316	0.093922	0.13177	0.17535	0.16302	0.12939	0.105	0.090017	0.089186	0.096269	0.053847	0.1104	0.17279	0.1764	0.13973	0.10153	0.08403	0.092791	0.091669	0.0040652	0.015392	0.025755	0.057191	0.2261	0.13932	0.045483	0.025753	0.014663	0.0095584	0.017433	0.02537	0.049024	0.092385	0.09563	0.093118	0.080805	0.046757	0.040893	0.01875	2
0.070025	0.08139	0.1224	0.18034	0.16385	0.13088	0.12029	0.087069	0.095206	0.076947	0.074439	0.069684	0.063213	0.15455	0.17573	0.16753	0.12586	0.09361	0.094295	0.11049	0.0063579	0.015928	0.02053	0.044611	0.10861	0.23403	0.082953	0.03012	0.012969	0.003505	0.011882	0.023596	0.052684	0.097477	0.093725	0.094351	0.076611	0.047244	0.044292	0.021518	2
0.080543	0.088156	0.15343	0.18056	0.15388	0.13845	0.094826	0.10193	0.087307	0.087823	0.08607	0.058355	0.11998	0.17317	0.1802	0.14065	0.098824	0.091348	0.10944	0.10675	0.0087526	0.014959	0.023281	0.044243	0.14598	0.22121	0.074842	0.029983	0.01357	0.0071653	0.01235	0.028594	0.071953	0.098073	0.093966	0.10126	0.060162	0.049316	0.039567	0.022432	2
0.10269	0.074835	0.086573	0.10472	0.18244	0.16388	0.13607	0.12819	0.07636	0.092156	0.095436	0.095773	0.074006	0.077475	0.17004	0.17967	0.16316	0.12111	0.085586	0.085099	0.0092688	0.017908	0.024301	0.047473	0.13855	0.21804	0.073979	0.023646	0.013634	0.0046396	0.019084	0.037845	0.036147	0.063815	0.11206	0.097713	0.081817	0.065519	0.034008	0.021075	2
0.072347	0.082509	0.087133	0.16771	0.17481	0.14607	0.13313	0.088914	0.10854	0.089406	0.089172	0.054693	0.12336	0.17621	0.17654	0.13398	0.10163	0.087137	0.11402	0.094468	0.0072563	0.013691	0.026321	0.059077	0.19077	0.17608	0.053537	0.028744	0.014764	0.0085982	0.014118	0.022161	0.056045	0.10017	0.091007	0.10202	0.074708	0.049709	0.043278	0.020802	2
0.025173	0.037514	0.022668	0.021936	0.02833	0.019101	0.020732	0.020422	0.024977	0.020363	0.022611	0.017659	0.018347	0.022813	0.026028	0.029755	0.023333	0.018888	0.033416	0.028632	0.0033012	0.008541	0.011747	0.011647	0.01333	0.023108	0.017597	0.010805	0.012081	0.0075975	0.00082471	0.004416	0.007996	0.013674	0.034817	0.030357	0.011456	0.0096682	0.0057411	0.0018292	2
0.02489	0.035669	0.019632	0.019447	0.028377	0.019235	0.019625	0.020042	0.02372	0.017697	0.019863	0.019969	0.021283	0.024203	0.022825	0.024299	0.018045	0.023556	0.029688	0.024541	0.0036388	0.005805	0.012402	0.010844	0.014441	0.02402	0.015588	0.0090649	0.012445	0.0056462	0.0016239	0.0045993	0.0085859	0.013955	0.037545	0.019569	0.01125	0.008613	0.0064192	0.0019514	2
0.017862	0.032318	0.023479	0.019336	0.027709	0.020775	0.02157	0.020436	0.023947	0.023561	0.024972	0.021543	0.018	0.018174	0.027577	0.023118	0.025636	0.020231	0.020079	0.031101	0.0033286	0.010038	0.010339	0.012043	0.015167	0.022335	0.017199	0.010061	0.0090928	0.0054816	0.0017003	0.0050982	0.0088476	0.01378	0.021295	0.034759	0.01276	0.0078145	0.0070016	0.0019262	2
0.037584	0.023397	0.019187	0.029332	0.021115	0.021446	0.020142	0.02156	0.021328	0.016891	0.021835	0.018417	0.018132	0.024062	0.023424	0.027815	0.023936	0.018748	0.030377	0.026516	0.0020416	0.0074024	0.010114	0.014199	0.014966	0.018276	0.021568	0.010406	0.0083734	0.0091631	0.001513	0.0047909	0.0096957	0.014158	0.038585	0.019083	0.010987	0.0087333	0.0055255	0.0025393	2
0.030299	0.032824	0.017866	0.024333	0.025328	0.018399	0.021137	0.020422	0.023362	0.019892	0.021167	0.020394	0.020232	0.026036	0.024268	0.024718	0.021347	0.020509	0.034853	0.020824	0.0025274	0.0078975	0.011973	0.011591	0.015434	0.02303	0.017185	0.010348	0.011849	0.0055939	0.001888	0.005156	0.0090575	0.013667	0.037565	0.02216	0.010994	0.0086274	0.0070086	0.0017448	2
0.013823	0.021204	0.039339	0.018196	0.032404	0.024187	0.018677	0.025249	0.024362	0.014252	0.018807	0.025066	0.018139	0.018995	0.027635	0.020744	0.018459	0.027938	0.027494	0.028675	0.0013882	0.0092652	0.010227	0.012512	0.017362	0.020864	0.01343	0.016912	0.011905	0.0016508	0.0013178	0.0039828	0.0069531	0.013364	0.033672	0.023591	0.01073	0.013194	0.0060631	0.0017711	2
0.014741	0.033211	0.028874	0.023732	0.032616	0.019607	0.02158	0.031177	0.018542	0.016516	0.027341	0.021846	0.020807	0.017666	0.029906	0.022517	0.019084	0.026318	0.024069	0.030378	0.0015889	0.0084723	0.014152	0.013632	0.016781	0.02395	0.013318	0.01151	0.014022	0.003426	0.0020716	0.0050925	0.0086885	0.014425	0.034597	0.023895	0.0101	0.011214	0.0067061	0.0019314	2
0.015442	0.028783	0.027655	0.022664	0.034435	0.021925	0.02143	0.029112	0.019249	0.014598	0.028017	0.023068	0.024086	0.019058	0.018658	0.030852	0.021644	0.018739	0.025576	0.025312	0.0016215	0.005947	0.015487	0.016089	0.017319	0.02148	0.014807	0.010185	0.010446	0.0039737	0.0016839	0.0070967	0.0087942	0.01483	0.026459	0.031956	0.0099102	0.0097343	0.0050069	0.0023209	2
0.014033	0.029363	0.034579	0.025568	0.034251	0.023697	0.021335	0.026133	0.021863	0.014784	0.020961	0.024955	0.019304	0.023905	0.029221	0.024943	0.020023	0.028271	0.024396	0.027052	0.0014202	0.0089315	0.011179	0.014358	0.018203	0.023438	0.014379	0.016414	0.011429	0.0016322	0.0015069	0.004579	0.0086508	0.013785	0.0393	0.021836	0.011628	0.012375	0.0057659	0.0016752	2
0.021157	0.035948	0.019166	0.031778	0.025698	0.015704	0.020545	0.023998	0.013282	0.017419	0.01863	0.022846	0.017522	0.026447	0.028859	0.017993	0.01968	0.02394	0.024545	0.024704	0.0012509	0.0064934	0.011037	0.011993	0.016542	0.02308	0.014488	0.01315	0.012591	0.0022598	0.0011762	0.0048154	0.0093982	0.021551	0.030109	0.015038	0.013822	0.0088464	0.0054456	0.0024144	2
0.026224	0.021954	0.021405	0.031647	0.025052	0.016372	0.022928	0.021364	0.024894	0.020948	0.019321	0.031106	0.022577	0.035341	0.025911	0.017902	0.02397	0.021489	0.017326	0.017911	0.0012242	0.006952	0.009326	0.014931	0.030077	0.02724	0.0097482	0.010556	0.0053376	0.0018945	0.0041419	0.010329	0.011744	0.017962	0.016629	0.019141	0.018058	0.011242	0.0055937	0.0020727	2
0.02516	0.019545	0.030313	0.029971	0.016759	0.021426	0.026918	0.023963	0.022106	0.018529	0.017822	0.026148	0.021086	0.037731	0.022648	0.018257	0.028345	0.025102	0.018249	0.019534	0.0013374	0.0069191	0.0086617	0.01137	0.024573	0.037398	0.009096	0.0092125	0.006385	0.0026857	0.0034072	0.006982	0.012406	0.019398	0.01724	0.019256	0.020083	0.0096398	0.0048633	0.0035849	2
0.025151	0.024808	0.023898	0.033277	0.023677	0.015805	0.023943	0.021594	0.025403	0.02338	0.032135	0.020697	0.034002	0.028127	0.017365	0.026113	0.025841	0.01877	0.018258	0.019098	0.0028204	0.0060234	0.0087241	0.015528	0.038673	0.016689	0.011119	0.011516	0.0072952	0.001254	0.0066496	0.0073751	0.012049	0.018784	0.017559	0.020217	0.019604	0.0087942	0.0054142	0.0032168	2
0.022355	0.023256	0.034111	0.023936	0.01737	0.025467	0.021638	0.028214	0.02057	0.020258	0.026293	0.020667	0.032724	0.028507	0.017997	0.024705	0.026638	0.018219	0.021167	0.019831	0.001861	0.0080991	0.0079261	0.012405	0.030192	0.030315	0.010354	0.0091553	0.0063532	0.0028104	0.0040178	0.0087385	0.014752	0.014164	0.017887	0.023572	0.016967	0.008746	0.0076265	0.0022088	2
0.029595	0.023651	0.025326	0.031385	0.017267	0.021678	0.023789	0.023591	0.025084	0.021288	0.032797	0.020806	0.034308	0.023918	0.019025	0.026657	0.025029	0.018824	0.022047	0.020411	0.0025747	0.0067652	0.0092022	0.013506	0.037819	0.020325	0.010453	0.0112	0.0077511	0.0020428	0.0065045	0.0071477	0.014686	0.016584	0.018892	0.021912	0.017677	0.0083167	0.0065716	0.0032753	2
0.014538	0.027122	0.023077	0.019654	0.022885	0.03176	0.024736	0.024023	0.0184	0.022099	0.010672	0.021332	0.017934	0.020744	0.024919	0.029983	0.023302	0.029704	0.026719	0.024174	0.0020993	0.0083607	0.0069519	0.013672	0.021629	0.018721	0.015179	0.013721	0.010567	0.0033576	0.0015259	0.0036773	0.0054407	0.0079949	0.019749	0.041382	0.017968	0.0080633	0.0044287	0.002568	2
0.015625	0.028774	0.025017	0.019638	0.025267	0.030486	0.023953	0.021979	0.019489	0.02181	0.022524	0.016337	0.020193	0.02498	0.029131	0.022251	0.034353	0.027784	0.022031	0.012424	0.0053129	0.0064445	0.0088106	0.016019	0.021762	0.016324	0.013966	0.016034	0.0080955	0.0021483	0.0014451	0.0036844	0.0050031	0.012517	0.040616	0.027656	0.011647	0.0076579	0.0047531	0.0015347	2
0.012006	0.021785	0.025822	0.023085	0.020879	0.034093	0.026138	0.023494	0.017003	0.022145	0.0085399	0.017667	0.018242	0.019618	0.02495	0.032468	0.022301	0.028615	0.029439	0.024954	0.0012233	0.0069641	0.0065113	0.014681	0.023201	0.018977	0.014672	0.014144	0.0095247	0.0031101	0.0011081	0.0038541	0.0055011	0.0075812	0.015701	0.043136	0.019236	0.0084151	0.0052074	0.0023703	2
0.019592	0.015479	0.026048	0.02393	0.020528	0.024444	0.031095	0.024014	0.022783	0.019962	0.019079	0.014824	0.021923	0.031763	0.024911	0.025896	0.029881	0.02408	0.01946	0.016525	0.0038321	0.0052111	0.012625	0.019231	0.017747	0.016939	0.016711	0.011488	0.005363	0.0046779	0.001201	0.0043704	0.0049454	0.0093059	0.035543	0.031785	0.013312	0.0079586	0.0040122	0.0020415	2
0.019387	0.016904	0.02657	0.023686	0.019352	0.029311	0.02899	0.024764	0.020677	0.019835	0.02044	0.01575	0.023384	0.030784	0.02377	0.026353	0.029783	0.024458	0.019398	0.015505	0.0041151	0.0047314	0.012524	0.020041	0.017595	0.017273	0.016253	0.012433	0.0050202	0.0043615	0.0013158	0.0044365	0.0050425	0.010535	0.038981	0.028681	0.012521	0.0079853	0.0040065	0.0019034	2
0.015676	0.020134	0.022315	0.030662	0.026912	0.02301	0.018183	0.025409	0.020588	0.016122	0.020691	0.020811	0.031311	0.02436	0.022152	0.016846	0.022559	0.023897	0.021392	0.014025	0.00079931	0.0034842	0.0067099	0.011973	0.039336	0.023465	0.010742	0.0060457	0.0037665	0.0014843	0.0033659	0.0083225	0.011791	0.018912	0.017158	0.012532	0.014709	0.011314	0.0086477	0.0024191	2
0.0218	0.027668	0.022626	0.030052	0.02483	0.02042	0.020505	0.026871	0.021558	0.016292	0.026255	0.021535	0.020582	0.029253	0.022257	0.023156	0.01773	0.022778	0.023932	0.02333	0.00096579	0.0036076	0.0062239	0.0098098	0.030508	0.03909	0.013867	0.0066742	0.0036841	0.0013007	0.0074825	0.0093566	0.010245	0.017123	0.017737	0.014575	0.011764	0.01243	0.010851	0.0039237	2
0.025562	0.027137	0.023791	0.032069	0.024511	0.018878	0.021798	0.024718	0.017557	0.01732	0.028061	0.021648	0.019046	0.030988	0.027424	0.023767	0.016791	0.019962	0.022837	0.023035	0.0012448	0.0037954	0.0070817	0.0092475	0.026052	0.042302	0.016713	0.0067035	0.0029579	0.0011223	0.00841	0.0094144	0.0112	0.01774	0.018439	0.013432	0.012388	0.012471	0.0098651	0.0032769	2
0.01807	0.016369	0.020227	0.021846	0.030083	0.026349	0.023453	0.018268	0.024383	0.020861	0.020985	0.019356	0.031272	0.026193	0.024888	0.017879	0.022424	0.023698	0.020664	0.011875	0.00088238	0.0030935	0.0075145	0.020751	0.037389	0.016837	0.010322	0.006855	0.0046072	0.0010657	0.0021115	0.0080435	0.011824	0.016909	0.020242	0.015641	0.010209	0.01211	0.0089069	0.0030621	2
0.02011	0.02466	0.027444	0.021503	0.031422	0.023992	0.01957	0.020066	0.025319	0.018062	0.027991	0.022695	0.01687	0.027798	0.025973	0.023328	0.018709	0.020937	0.024422	0.022692	0.0012472	0.003585	0.0057425	0.011501	0.040331	0.028646	0.012486	0.0067275	0.0044194	0.0017546	0.0035464	0.012975	0.011031	0.014331	0.020589	0.016698	0.010185	0.01177	0.0087574	0.0061251	2
0.041676	0.018262	0.021977	0.022725	0.017723	0.020174	0.024675	0.029112	0.016622	0.013961	0.0080117	0.015877	0.024005	0.023851	0.023837	0.019499	0.016238	0.025864	0.037942	0.032557	0.00061102	0.0032882	0.0053278	0.0076206	0.012811	0.043033	0.020058	0.0069323	0.0091677	0.0051159	0.0010833	0.011107	0.0079096	0.013477	0.022546	0.014078	0.011788	0.014482	0.012076	0.0036128	2
0.038043	0.017195	0.023499	0.026409	0.015986	0.024302	0.027095	0.030008	0.022644	0.019531	0.027128	0.022953	0.024423	0.021758	0.018628	0.023243	0.033106	0.03393	0.022867	0.017329	0.0013428	0.0036286	0.0065173	0.010417	0.036937	0.037916	0.011946	0.0075074	0.0086475	0.00049722	0.0089657	0.0067494	0.011955	0.019843	0.014773	0.014217	0.017293	0.015127	0.0095801	0.0041698	2
0.023347	0.020737	0.024925	0.020941	0.020671	0.025569	0.031102	0.022568	0.016949	0.01269	0.014712	0.018485	0.023317	0.024784	0.020278	0.017423	0.023393	0.026831	0.032258	0.018766	0.00126	0.0035417	0.0059734	0.0090586	0.016812	0.040637	0.019144	0.0071713	0.0041719	0.0019041	0.0043284	0.005492	0.012269	0.015153	0.015813	0.014412	0.016051	0.014908	0.0091235	0.0017895	2
0.021293	0.020285	0.023537	0.019547	0.021357	0.02672	0.032141	0.020403	0.01605	0.013512	0.0098447	0.015155	0.018378	0.023812	0.023861	0.02165	0.018835	0.024291	0.027787	0.03123	0.0011476	0.003485	0.0061041	0.0095915	0.01113	0.029249	0.030981	0.0088091	0.0036845	0.0023596	0.0020671	0.0057061	0.010827	0.013498	0.017316	0.012827	0.016027	0.017007	0.0096354	0.0020172	2
0.042245	0.016733	0.020713	0.025115	0.018411	0.022486	0.027132	0.029456	0.01743	0.014646	0.008573	0.021502	0.02228	0.025092	0.023902	0.020139	0.017884	0.030435	0.036467	0.030243	0.00073728	0.0036187	0.0056323	0.0086427	0.014317	0.043795	0.020207	0.0069455	0.010032	0.0037657	0.0010439	0.01163	0.00859	0.014474	0.024053	0.013637	0.013223	0.015176	0.011857	0.0035443	2
0.014279	0.016554	0.016376	0.01868	0.022311	0.020445	0.03281	0.02393	0.0214	0.018933	0.01974	0.028712	0.029739	0.021023	0.020559	0.017608	0.01236	0.02545	0.016899	0.013938	0.0041625	0.0071444	0.015758	0.012645	0.014984	0.022511	0.010663	0.0079913	0.004641	0.0015304	0.0022473	0.0046587	0.0065718	0.009634	0.02997	0.023436	0.013034	0.0082079	0.0041295	0.0015265	2
0.014824	0.016061	0.017109	0.019144	0.021719	0.029235	0.028293	0.022069	0.019581	0.023207	0.017633	0.02336	0.031699	0.025883	0.020983	0.019058	0.012358	0.022122	0.020123	0.016793	0.0044447	0.0076048	0.013689	0.015	0.013492	0.021113	0.015792	0.0077396	0.005367	0.0015023	0.0017758	0.0039183	0.0075097	0.010277	0.029895	0.022939	0.014915	0.0074535	0.0038998	0.0026383	2
0.014982	0.014833	0.018123	0.022903	0.072263	0.099741	0.026542	0.020827	0.014516	0.019851	0.032992	0.027619	0.020573	0.01959	0.014223	0.021071	0.023337	0.017095	0.026774	0.11112	0.0022299	0.0094054	0.016008	0.011847	0.01835	0.019366	0.023505	0.052861	0.0044894	0.0019088	0.0010859	0.0048402	0.0084066	0.026051	0.020722	0.017096	0.017715	0.056261	0.0055546	0.0022469	2
0.013922	0.014952	0.01554	0.019784	0.022164	0.089988	0.096545	0.024352	0.018316	0.013131	0.031614	0.023698	0.020676	0.017386	0.012083	0.025933	0.01978	0.016119	0.043452	0.11062	0.0018993	0.012369	0.010965	0.011332	0.022756	0.01359	0.063689	0.018374	0.0051203	0.0017486	0.0017225	0.0045219	0.0063311	0.019074	0.024758	0.015526	0.014313	0.060521	0.014585	0.0011789	2
0.011727	0.01355	0.015587	0.016829	0.018932	0.022554	0.024363	0.033254	0.024588	0.021694	0.016593	0.029461	0.028787	0.020768	0.019566	0.014867	0.014609	0.027962	0.016362	0.013746	0.0030443	0.011865	0.013114	0.010565	0.020296	0.019927	0.010146	0.0079065	0.0040675	0.0011656	0.001271	0.0052831	0.0070454	0.0089181	0.018062	0.029559	0.011638	0.013283	0.0040477	0.0015644	2
0.013968	0.015689	0.024834	0.015391	0.015199	0.020965	0.020966	0.030031	0.030455	0.020229	0.014461	0.015663	0.015187	0.018598	0.021149	0.02016	0.033623	0.026126	0.022188	0.019448	0.0024551	0.0045573	0.006362	0.009373	0.030412	0.022996	0.014165	0.008002	0.004144	0.0014934	0.0014867	0.0039328	0.0078642	0.010188	0.022092	0.015582	0.011803	0.016265	0.0091359	0.0046186	2
0.093451	0.017407	0.017377	0.025606	0.015777	0.015196	0.020633	0.02169	0.027407	0.029869	0.014828	0.014868	0.017144	0.019876	0.038486	0.10488	0.037604	0.020954	0.015933	0.018399	0.0012479	0.0042491	0.005938	0.023006	0.025943	0.015499	0.013513	0.04632	0.0062103	0.0024403	0.0024038	0.0038358	0.033042	0.031413	0.019084	0.01902	0.01163	0.014954	0.010982	0.0025467	2
0.020327	0.016006	0.023503	0.019031	0.014763	0.02021	0.021263	0.027953	0.033403	0.020889	0.01439	0.016882	0.015929	0.019545	0.022135	0.02973	0.03348	0.02467	0.019951	0.021507	0.0025303	0.0036977	0.0061933	0.013282	0.033331	0.018169	0.015231	0.0094074	0.0038058	0.0024471	0.0018875	0.0040186	0.0098711	0.011089	0.021655	0.016565	0.01135	0.017412	0.0086249	0.0045737	2
0.014988	0.022575	0.01726	0.013077	0.020193	0.019624	0.026734	0.032666	0.019364	0.012714	0.013504	0.01383	0.016699	0.0154	0.016865	0.020436	0.024772	0.033344	0.023809	0.021097	0.0012292	0.0051852	0.0067989	0.0088537	0.014343	0.031743	0.013607	0.011989	0.0039997	0.0011841	0.0011151	0.0040934	0.0079497	0.0099031	0.021853	0.015045	0.011272	0.016149	0.0089514	0.0026637	2
0.02814	0.015776	0.022038	0.019409	0.013246	0.018562	0.020029	0.026262	0.03638	0.021165	0.014175	0.015843	0.016438	0.019107	0.021415	0.03485	0.037363	0.024379	0.019833	0.020378	0.0027663	0.0038763	0.0061624	0.012743	0.032958	0.01793	0.014769	0.012728	0.004643	0.0022342	0.0017792	0.004137	0.013107	0.012231	0.020092	0.017389	0.010988	0.017461	0.0092901	0.0042183	2
0.021722	0.026912	0.026331	0.028415	0.031896	0.027527	0.022678	0.015949	0.015624	0.026661	0.024735	0.028288	0.029391	0.020017	0.022999	0.03154	0.031016	0.021266	0.018936	0.01694	0.0013288	0.0040408	0.0075243	0.017489	0.024387	0.042411	0.013901	0.0060765	0.0039574	0.0015881	0.0042322	0.014289	0.012282	0.014449	0.021087	0.018194	0.010988	0.015501	0.0095267	0.0020735	2
0.025736	0.029948	0.021674	0.032582	0.026872	0.022576	0.019869	0.016624	0.018007	0.022592	0.018527	0.022926	0.024175	0.027616	0.020256	0.023244	0.026884	0.030411	0.021461	0.020064	0.0015426	0.0047416	0.0063862	0.011073	0.020097	0.031156	0.031764	0.0063142	0.0031768	0.0018294	0.0038124	0.010332	0.014	0.014614	0.018498	0.019858	0.011521	0.011023	0.011981	0.0019741	2
0.023316	0.029194	0.026895	0.024993	0.032956	0.026632	0.024792	0.017888	0.015173	0.024553	0.021396	0.024844	0.030531	0.029618	0.020676	0.024494	0.031099	0.027343	0.021376	0.017293	0.001757	0.004149	0.0064949	0.014838	0.020441	0.043857	0.020076	0.0053048	0.0032774	0.0015793	0.0034766	0.012201	0.01648	0.015091	0.017702	0.021165	0.011977	0.0095889	0.012999	0.0019693	2
0.017636	0.025502	0.031778	0.022075	0.03202	0.02804	0.024843	0.021581	0.014455	0.017223	0.023438	0.022936	0.031352	0.023827	0.021677	0.025664	0.026986	0.019394	0.021504	0.017025	0.0014764	0.0033732	0.006778	0.013076	0.027681	0.041184	0.013296	0.00615	0.0037151	0.0013297	0.0031676	0.011557	0.015651	0.01459	0.0164	0.021326	0.01212	0.0098709	0.0098025	0.0021803	2
0.022806	0.028607	0.02622	0.026021	0.031716	0.024835	0.020534	0.017061	0.017115	0.02491	0.017254	0.024885	0.023127	0.032557	0.023244	0.022087	0.022908	0.033866	0.020549	0.020507	0.0017937	0.0050084	0.0070974	0.012208	0.020719	0.033484	0.030556	0.0058443	0.0032442	0.0014286	0.0020973	0.010732	0.016751	0.014379	0.017326	0.021401	0.013961	0.0074394	0.013565	0.0028303	2
0.024057	0.025341	0.020727	0.021654	0.033032	0.023059	0.022976	0.018512	0.022405	0.022509	0.017869	0.027399	0.015198	0.022268	0.02739	0.028349	0.023151	0.031833	0.023421	0.018248	0.0049653	0.0094955	0.0080996	0.011522	0.019179	0.021185	0.014353	0.013027	0.012114	0.0032791	0.001653	0.0036887	0.0052556	0.01182	0.041822	0.028853	0.011851	0.0071323	0.0047927	0.0019284	2
0.023473	0.022424	0.017801	0.024734	0.030165	0.024357	0.021466	0.01829	0.021563	0.023693	0.016011	0.014338	0.021419	0.022682	0.018278	0.023095	0.030179	0.026987	0.026176	0.029361	0.0024496	0.0080551	0.013422	0.010217	0.014747	0.019226	0.016999	0.010752	0.010227	0.0079802	0.0011845	0.0034534	0.0071733	0.0079674	0.017752	0.042386	0.020855	0.007306	0.0036491	0.0014235	2
0.020441	0.025135	0.019778	0.022276	0.031712	0.022275	0.022227	0.01718	0.021714	0.023034	0.011761	0.016336	0.025825	0.016338	0.022815	0.026799	0.029663	0.022942	0.031083	0.023691	0.0032034	0.0079665	0.011658	0.0084918	0.016374	0.021675	0.015434	0.010896	0.0121	0.005552	0.0006468	0.0033928	0.0054075	0.0084503	0.021571	0.043697	0.017632	0.0068785	0.0033361	0.0018619	2
0.024057	0.025341	0.020727	0.021654	0.033032	0.023059	0.022976	0.018512	0.022405	0.022509	0.017869	0.027399	0.015198	0.022268	0.02739	0.028349	0.023151	0.031833	0.023421	0.018248	0.0049653	0.0094955	0.0080996	0.011522	0.019179	0.021185	0.014353	0.013027	0.012114	0.0032791	0.001653	0.0036887	0.0052556	0.01182	0.041822	0.028853	0.011851	0.0071323	0.0047927	0.0019284	2
0.021504	0.024079	0.020176	0.020135	0.03113	0.023559	0.022948	0.019014	0.022647	0.023495	0.01179	0.017477	0.027693	0.015733	0.023504	0.027618	0.027632	0.022938	0.030177	0.024262	0.0037823	0.0086074	0.011729	0.0085928	0.017481	0.021675	0.01484	0.01077	0.011675	0.0056296	0.00077166	0.0035913	0.0047554	0.0086298	0.023838	0.043459	0.016479	0.0075897	0.0032305	0.0021095	2
0.018452	0.024606	0.025078	0.019644	0.02186	0.031473	0.045812	0.026612	0.024556	0.02268	0.032209	0.020595	0.020263	0.018639	0.019987	0.025732	0.035336	0.043853	0.022725	0.020917	0.0017011	0.0054805	0.0096995	0.016006	0.03005	0.036157	0.014584	0.0095175	0.0053924	0.0013399	0.0046719	0.0090228	0.011012	0.013228	0.015247	0.020903	0.025642	0.018601	0.0079683	0.0037041	2
0.021713	0.024594	0.023648	0.018572	0.024207	0.043655	0.035703	0.024874	0.024126	0.02366	0.03381	0.020983	0.021064	0.019522	0.019362	0.024628	0.035623	0.046136	0.022375	0.019376	0.0029126	0.0062734	0.0092965	0.013782	0.02698	0.038663	0.017085	0.008435	0.0053763	0.0014172	0.0063284	0.008082	0.010434	0.012197	0.016288	0.022984	0.027333	0.017387	0.0069107	0.002752	2
0.016835	0.019825	0.024709	0.019685	0.021619	0.033417	0.043391	0.026821	0.028994	0.02254	0.024834	0.018876	0.021417	0.017524	0.019617	0.029882	0.041011	0.04051	0.020188	0.023159	0.0022229	0.0062637	0.0081965	0.014562	0.028355	0.039123	0.0138	0.0092598	0.0054684	0.0010582	0.0029942	0.0075673	0.010773	0.01176	0.01475	0.023829	0.027278	0.017004	0.0076269	0.004788	2
0.017222	0.019334	0.021903	0.022191	0.020604	0.027727	0.046709	0.031281	0.028721	0.027608	0.026739	0.017888	0.020349	0.017394	0.022936	0.032821	0.047317	0.029699	0.018072	0.027493	0.0017956	0.0057259	0.009331	0.015575	0.03671	0.033493	0.012392	0.0097832	0.0049146	0.0011939	0.0028099	0.0079401	0.0106	0.012268	0.015133	0.022635	0.027349	0.017143	0.0065902	0.0077384	2
0.018204	0.022914	0.020857	0.022113	0.031459	0.045019	0.027206	0.032839	0.026537	0.024011	0.023212	0.022061	0.020808	0.020819	0.024777	0.034681	0.049315	0.025504	0.01908	0.030582	0.003033	0.0081093	0.0087498	0.013291	0.02469	0.043323	0.017634	0.0084838	0.0062063	0.0020226	0.0032977	0.0063855	0.0086137	0.012643	0.020965	0.031146	0.026385	0.010629	0.011894	0.0028958	2
0.029452	0.050205	0.045607	0.040286	0.05273	0.03416	0.047647	0.091516	0.058241	0.052099	0.040582	0.040658	0.053552	0.052483	0.052618	0.066512	0.03875	0.050135	0.063542	0.045371	0.006205	0.023929	0.027318	0.039845	0.037096	0.039942	0.018257	0.025292	0.024221	0.0077746	0.0022829	0.0048984	0.012725	0.019686	0.052083	0.092887	0.034072	0.015095	0.016255	0.0023382	2
0.041556	0.029257	0.049617	0.042443	0.04258	0.049136	0.039301	0.060964	0.093356	0.063269	0.03546	0.031649	0.045255	0.054871	0.063702	0.06446	0.056191	0.034225	0.065476	0.061528	0.0046647	0.022141	0.0352	0.045422	0.03299	0.040127	0.017416	0.023278	0.019947	0.013973	0.0016571	0.0072375	0.011187	0.018463	0.032796	0.073215	0.075807	0.017783	0.0096415	0.006322	2
0.042833	0.037447	0.045397	0.043245	0.036455	0.049625	0.041963	0.040046	0.087874	0.06989	0.032346	0.030384	0.034687	0.053044	0.05992	0.061429	0.056199	0.033022	0.061627	0.074003	0.0046541	0.019758	0.032359	0.040469	0.031722	0.036321	0.020768	0.025562	0.019266	0.016409	0.0024651	0.0078476	0.011309	0.018291	0.026341	0.068298	0.072773	0.024125	0.0098768	0.0062918	2
0.042833	0.037447	0.045397	0.043245	0.036455	0.049625	0.041963	0.040046	0.087874	0.06989	0.032346	0.030384	0.034687	0.053044	0.05992	0.061429	0.056199	0.033022	0.061627	0.074003	0.0046541	0.019758	0.032359	0.040469	0.031722	0.036321	0.020768	0.025562	0.019266	0.016409	0.0024651	0.0078476	0.011309	0.018291	0.026341	0.068298	0.072773	0.024125	0.0098768	0.0062918	2
0.043479	0.032434	0.047214	0.044411	0.038055	0.050043	0.037351	0.038391	0.091214	0.06716	0.034587	0.03147	0.042933	0.058368	0.054043	0.060609	0.044781	0.038237	0.064156	0.064124	0.0062285	0.023259	0.034233	0.033938	0.029419	0.034208	0.019634	0.029698	0.017635	0.015662	0.0021765	0.00746	0.010426	0.017524	0.03264	0.073469	0.068888	0.017732	0.0090991	0.00473	2
0.03757	0.044944	0.043165	0.044997	0.056693	0.049013	0.066168	0.079703	0.10057	0.094098	0.053086	0.05742	0.088076	0.070693	0.057189	0.068124	0.063312	0.057641	0.053351	0.04968	0.012004	0.028797	0.042326	0.048131	0.049982	0.05535	0.035233	0.026985	0.0089382	0.0038023	0.0058508	0.012094	0.025911	0.025055	0.029975	0.098849	0.049844	0.034179	0.019782	0.0078221	2
0.055535	0.038371	0.0506	0.051714	0.061314	0.081089	0.085165	0.095906	0.050789	0.033355	0.062599	0.081477	0.066691	0.056268	0.060191	0.062965	0.056464	0.058486	0.042804	0.051473	0.0080249	0.023065	0.037279	0.04823	0.04882	0.049751	0.031171	0.033703	0.01233	0.0081863	0.0055242	0.014457	0.014973	0.036652	0.092105	0.056006	0.041683	0.025178	0.010864	0.0025291	2
0.034088	0.059491	0.041341	0.049539	0.062129	0.061212	0.065489	0.082349	0.11089	0.070842	0.094494	0.086361	0.054473	0.068474	0.058039	0.062171	0.052791	0.043321	0.061062	0.058236	0.016333	0.039463	0.042205	0.040425	0.052093	0.045351	0.040585	0.020655	0.014681	0.0078484	0.0038109	0.018219	0.021648	0.02339	0.089197	0.062472	0.04402	0.033795	0.016328	0.0047271	2
0.039025	0.048698	0.036603	0.053479	0.050776	0.058273	0.076651	0.096927	0.10689	0.063767	0.066336	0.084671	0.079066	0.058279	0.070725	0.057077	0.058522	0.053443	0.044057	0.054998	0.015165	0.02978	0.046963	0.045505	0.048673	0.047707	0.037766	0.025775	0.0097193	0.0062936	0.0032103	0.014892	0.021806	0.019827	0.084494	0.072576	0.044685	0.034524	0.015113	0.0046039	2
0.033853	0.051741	0.041889	0.042031	0.050357	0.052974	0.066614	0.093628	0.11167	0.085864	0.064108	0.09348	0.081832	0.050746	0.06964	0.0555	0.05976	0.05179	0.042418	0.060989	0.016005	0.032924	0.048662	0.045791	0.047943	0.047611	0.036965	0.020357	0.010065	0.0078165	0.0027972	0.015497	0.022074	0.020117	0.066548	0.084209	0.046246	0.034876	0.018382	0.0052516	2
0.052557	0.082975	0.085207	0.079025	0.065097	0.05202	0.031421	0.047977	0.073165	0.033401	0.041332	0.040057	0.054796	0.065547	0.058551	0.050331	0.052084	0.071982	0.06456	0.098636	0.0056202	0.018497	0.013872	0.01491	0.023795	0.093499	0.074718	0.019775	0.028199	0.0073657	0.003693	0.017402	0.033538	0.036961	0.053397	0.058185	0.042883	0.017283	0.028273	0.0078359	2
0.064268	0.054382	0.089137	0.084192	0.074987	0.058355	0.045602	0.028083	0.059934	0.064617	0.042339	0.041926	0.061621	0.068754	0.065085	0.042268	0.054794	0.062921	0.082915	0.099887	0.0056827	0.012116	0.0099139	0.014693	0.049483	0.12633	0.031243	0.035415	0.020698	0.0055676	0.0077557	0.021191	0.035985	0.036383	0.045143	0.046091	0.052502	0.024728	0.022157	0.021293	2
0.067875	0.10979	0.11907	0.1101	0.057756	0.047666	0.029352	0.047163	0.091567	0.050694	0.055384	0.075727	0.06399	0.048035	0.048216	0.068631	0.065102	0.10677	0.098659	0.10105	0.0041551	0.0083581	0.0092222	0.015318	0.10507	0.10457	0.024711	0.050728	0.037167	0.0079561	0.013068	0.032615	0.033863	0.036772	0.060052	0.067324	0.044351	0.035166	0.027013	0.015363	2
0.077226	0.12678	0.11976	0.070975	0.056006	0.032562	0.026254	0.083276	0.051004	0.041206	0.042869	0.070566	0.064159	0.047208	0.047289	0.065429	0.057936	0.10011	0.090335	0.10097	0.0028767	0.0073288	0.010453	0.01399	0.05423	0.13697	0.025289	0.040024	0.043133	0.0058364	0.013461	0.034025	0.032473	0.03276	0.063277	0.063115	0.029877	0.037405	0.02192	0.015111	2
0.058679	0.087641	0.077774	0.060276	0.062167	0.0459	0.034612	0.072829	0.042832	0.029178	0.039725	0.037767	0.042134	0.05979	0.058581	0.044865	0.044051	0.070348	0.066732	0.10376	0.0038545	0.015899	0.018099	0.016799	0.020364	0.05546	0.098324	0.02054	0.024234	0.0096072	0.0034878	0.015109	0.03323	0.03691	0.044899	0.059402	0.035952	0.020012	0.030949	0.0034197	2
0.066535	0.086149	0.079455	0.067955	0.083607	0.05626	0.091617	0.059376	0.043499	0.069433	0.089362	0.071948	0.086241	0.11238	0.084058	0.048273	0.056625	0.064784	0.061932	0.029055	0.0024463	0.023336	0.018409	0.02801	0.12453	0.099749	0.028121	0.017778	0.0077682	0.0022227	0.017235	0.039238	0.037657	0.04839	0.06692	0.044735	0.042207	0.022886	0.02092	0.013071	2
0.12143	0.08682	0.087635	0.080261	0.068668	0.077062	0.05329	0.098782	0.060335	0.047271	0.11648	0.090257	0.10218	0.095217	0.11385	0.058154	0.047114	0.090926	0.042448	0.029429	0.0031632	0.023084	0.01825	0.042469	0.13474	0.09618	0.033159	0.020715	0.017131	0.0034581	0.031805	0.051221	0.041142	0.047198	0.072414	0.054273	0.038641	0.040699	0.011194	0.0051038	2
0.11634	0.068716	0.085914	0.0774	0.069997	0.079168	0.052492	0.086432	0.050674	0.046243	0.11195	0.084618	0.091466	0.12617	0.083585	0.039015	0.064998	0.070397	0.039983	0.023347	0.0034775	0.021986	0.015963	0.047319	0.13015	0.078173	0.035392	0.018921	0.015426	0.0029264	0.029776	0.040397	0.043004	0.054275	0.072679	0.042911	0.03398	0.033011	0.013767	0.0053732	2
0.081082	0.086732	0.074875	0.067599	0.069442	0.069628	0.083767	0.046399	0.054209	0.063244	0.061728	0.061873	0.069333	0.075927	0.11569	0.069684	0.043702	0.066834	0.054313	0.07482	0.0026875	0.011131	0.027575	0.026359	0.055295	0.1382	0.053265	0.020483	0.011083	0.0032843	0.014085	0.032575	0.039169	0.043288	0.064283	0.045891	0.043068	0.025813	0.016461	0.022891	2
0.092522	0.074329	0.083782	0.073104	0.067194	0.067923	0.065363	0.086333	0.039901	0.057558	0.09723	0.088155	0.087589	0.12352	0.063997	0.042327	0.080729	0.056609	0.041971	0.022369	0.0043579	0.021177	0.015482	0.043085	0.13468	0.073249	0.030316	0.016992	0.013192	0.0021114	0.024599	0.037787	0.043654	0.050504	0.065071	0.041665	0.041652	0.026575	0.015959	0.0064828	2
0.059688	0.063556	0.037911	0.060744	0.062454	0.04965	0.046523	0.041728	0.047305	0.045783	0.059122	0.060239	0.058965	0.046537	0.044444	0.041023	0.052074	0.077007	0.040619	0.037489	0.0037517	0.010913	0.027738	0.037595	0.042867	0.055178	0.037487	0.021032	0.019526	0.0030917	0.0043485	0.02223	0.034508	0.042879	0.041369	0.036024	0.033874	0.019623	0.01521	0.0079802	2
0.062758	0.05037	0.046113	0.048281	0.05577	0.046834	0.048888	0.047851	0.052541	0.0533	0.058153	0.064681	0.049377	0.043582	0.039196	0.05777	0.060438	0.034313	0.041376	0.060675	0.0039167	0.01417	0.024619	0.027401	0.053274	0.061398	0.032078	0.022878	0.011902	0.0030912	0.0087866	0.021068	0.028863	0.033825	0.036938	0.042844	0.027221	0.025781	0.018459	0.0099618	2
0.066338	0.058696	0.045591	0.043947	0.053056	0.058492	0.047537	0.052064	0.043123	0.056106	0.058823	0.0554	0.055819	0.051778	0.052248	0.046316	0.073572	0.052121	0.036532	0.038927	0.0043339	0.016972	0.023852	0.03213	0.055584	0.051246	0.032451	0.024532	0.019171	0.0020306	0.0037215	0.020634	0.033321	0.047396	0.039807	0.035093	0.037656	0.018996	0.01451	0.0094327	2
0.057095	0.064063	0.046008	0.046037	0.05258	0.059541	0.046835	0.049384	0.038999	0.047752	0.06647	0.059321	0.047256	0.046084	0.04465	0.052974	0.073263	0.036375	0.037706	0.042757	0.0042986	0.017184	0.022372	0.031089	0.052999	0.050395	0.029321	0.027603	0.01725	0.0022695	0.0053749	0.018378	0.034845	0.046839	0.03994	0.036092	0.033918	0.016826	0.014894	0.0082244	2
0.048309	0.056604	0.057702	0.04405	0.051496	0.05338	0.055919	0.052333	0.051016	0.054716	0.068351	0.064618	0.056791	0.043643	0.046342	0.058158	0.073657	0.035338	0.036261	0.043469	0.007853	0.020091	0.019752	0.040931	0.055874	0.040339	0.036927	0.029698	0.0074954	0.0025111	0.0033847	0.021063	0.03127	0.046968	0.040458	0.035193	0.039073	0.021157	0.014002	0.0080313	2
0.082822	0.086905	0.12642	0.12197	0.13263	0.17133	0.13815	0.086654	0.058403	0.064089	0.087847	0.077332	0.081858	0.098142	0.11988	0.11508	0.11605	0.14276	0.10141	0.12216	0.0051417	0.012911	0.021373	0.04022	0.16191	0.12108	0.082248	0.05272	0.024011	0.012442	0.018096	0.028771	0.040515	0.061011	0.095845	0.086803	0.11226	0.046174	0.025457	0.01524	2
0.088801	0.074895	0.096005	0.10875	0.11621	0.1422	0.16805	0.12234	0.08116	0.054857	0.056019	0.12725	0.077205	0.074251	0.10994	0.11653	0.11928	0.13123	0.133	0.10565	0.0038613	0.013276	0.024296	0.041488	0.15853	0.13396	0.073993	0.04826	0.018325	0.0069745	0.019268	0.038498	0.03387	0.052521	0.071258	0.086807	0.087815	0.097035	0.026539	0.0098478	2
0.09056	0.080677	0.089395	0.10603	0.1181	0.13349	0.16739	0.12482	0.074309	0.052548	0.049926	0.12485	0.08204	0.080075	0.11037	0.1227	0.11675	0.12414	0.1349	0.096461	0.0039342	0.011756	0.022863	0.037763	0.16951	0.13354	0.070237	0.043213	0.016393	0.0097532	0.016305	0.044325	0.033028	0.048121	0.076902	0.087824	0.081991	0.095927	0.024551	0.0096491	2
0.083191	0.083302	0.1238	0.11883	0.13011	0.1559	0.15223	0.10139	0.065495	0.058699	0.079282	0.09254	0.080624	0.085918	0.12936	0.11876	0.12492	0.1332	0.10882	0.1156	0.0040902	0.01229	0.022168	0.04171	0.16393	0.12682	0.079871	0.052439	0.021802	0.0091672	0.020197	0.031229	0.037571	0.057501	0.088096	0.08922	0.10875	0.06195	0.023589	0.014226	2
0.074204	0.080632	0.12802	0.10627	0.12286	0.15993	0.14599	0.10179	0.066491	0.050833	0.039951	0.097595	0.090091	0.091747	0.10013	0.12536	0.11218	0.11946	0.14733	0.10668	0.0050131	0.013395	0.020785	0.033759	0.11475	0.15778	0.088082	0.059291	0.018366	0.004573	0.010249	0.035924	0.040007	0.049778	0.07844	0.089435	0.088689	0.08659	0.02482	0.01027	2
0.056258	0.063608	0.06002	0.060938	0.05406	0.064634	0.064697	0.055454	0.072932	0.069659	0.04816	0.046549	0.052855	0.046463	0.060432	0.073386	0.083552	0.087289	0.050807	0.070887	0.0071462	0.013262	0.018575	0.019494	0.072902	0.089395	0.043427	0.02705	0.014785	0.0043227	0.0039087	0.018639	0.024139	0.038668	0.058037	0.055271	0.038418	0.02866	0.019359	0.023714	2
0.064002	0.062923	0.061146	0.053358	0.059742	0.061318	0.07061	0.059899	0.070636	0.063916	0.050118	0.041634	0.051187	0.047806	0.060732	0.077857	0.098546	0.08828	0.046791	0.066324	0.0073911	0.010976	0.017031	0.019996	0.084319	0.082708	0.046595	0.028103	0.016312	0.0038983	0.0066077	0.019416	0.02499	0.037897	0.055126	0.055183	0.043402	0.030899	0.019611	0.019961	2
0.076075	0.05363	0.067732	0.055153	0.060304	0.056491	0.059817	0.064851	0.06118	0.036177	0.044938	0.047222	0.051199	0.068392	0.073614	0.080922	0.05701	0.05376	0.074808	0.045097	0.0052737	0.010173	0.011828	0.019464	0.074934	0.09382	0.042495	0.029212	0.0092267	0.0039749	0.0073935	0.023753	0.032937	0.044565	0.046886	0.041896	0.034441	0.032094	0.027582	0.0063586	2
0.069114	0.062451	0.067495	0.05802	0.058298	0.068448	0.052968	0.05532	0.065242	0.044751	0.040965	0.046453	0.045684	0.066377	0.076794	0.087851	0.069701	0.045733	0.06736	0.053355	0.0046439	0.010697	0.011834	0.018954	0.079512	0.085019	0.045565	0.029573	0.0085382	0.0056725	0.0062385	0.019379	0.030413	0.047717	0.0515	0.046135	0.033256	0.02385	0.028998	0.010902	2
0.055568	0.060311	0.054313	0.064953	0.050698	0.064611	0.064543	0.056985	0.067419	0.054205	0.043034	0.040678	0.052648	0.042519	0.053269	0.076548	0.088917	0.08344	0.044457	0.068349	0.0056583	0.011757	0.014876	0.020151	0.054686	0.10131	0.043825	0.028347	0.011199	0.0036243	0.0042418	0.01752	0.025619	0.035817	0.054173	0.053887	0.03695	0.02763	0.019269	0.021069	2
0.05068	0.044046	0.079533	0.072965	0.0728	0.066252	0.081463	0.088532	0.085673	0.090908	0.037457	0.050738	0.078341	0.041207	0.065176	0.12246	0.084865	0.090064	0.077737	0.089819	0.0038874	0.011108	0.020387	0.033563	0.10523	0.11758	0.029987	0.02029	0.021429	0.0028127	0.009704	0.012396	0.031725	0.037395	0.048706	0.072632	0.046916	0.037054	0.046704	0.022997	2
0.063051	0.093445	0.05732	0.08266	0.079104	0.086969	0.090541	0.075026	0.11642	0.10571	0.037715	0.06214	0.080185	0.04542	0.085637	0.12267	0.086288	0.087475	0.12554	0.12499	0.0055706	0.017122	0.019917	0.03192	0.083411	0.15074	0.075189	0.018932	0.018609	0.0081366	0.0034827	0.027607	0.036276	0.038966	0.073456	0.060303	0.050108	0.05348	0.054393	0.029699	2
0.055106	0.090474	0.063022	0.07257	0.071395	0.086625	0.10215	0.083949	0.10857	0.123	0.056481	0.088577	0.041668	0.064546	0.12399	0.080464	0.091182	0.10567	0.12824	0.072803	0.0066805	0.015758	0.023871	0.040627	0.13577	0.11755	0.043613	0.020522	0.017605	0.0062517	0.0070637	0.030685	0.028027	0.042199	0.073183	0.058458	0.0452	0.063313	0.061141	0.017267	2
0.046043	0.06587	0.091625	0.060572	0.073854	0.072918	0.085195	0.085277	0.07568	0.12503	0.038658	0.079763	0.060429	0.053251	0.10498	0.099106	0.088359	0.084884	0.11319	0.069836	0.0072869	0.016925	0.023391	0.03651	0.11161	0.11385	0.035347	0.021909	0.021897	0.0040125	0.004799	0.017149	0.038357	0.03751	0.066851	0.064475	0.044567	0.047987	0.055064	0.01512	2
0.065192	0.093154	0.058638	0.082831	0.080571	0.10053	0.099977	0.082285	0.14171	0.11414	0.041027	0.088367	0.053307	0.06061	0.1241	0.10787	0.099756	0.09454	0.14714	0.10781	0.0062751	0.021287	0.021253	0.033649	0.11224	0.15494	0.066811	0.019997	0.018875	0.0063675	0.0040047	0.030077	0.02796	0.044669	0.082173	0.06397	0.05324	0.063669	0.058772	0.028684	2
0.073093	0.12045	0.11435	0.12052	0.13236	0.11228	0.099735	0.12822	0.094943	0.1194	0.058669	0.076629	0.10277	0.08597	0.1028	0.14239	0.15518	0.14681	0.12534	0.11671	0.012773	0.036751	0.056743	0.049824	0.074628	0.11594	0.077976	0.067596	0.050408	0.016158	0.0028031	0.0084095	0.017842	0.057761	0.17351	0.1237	0.075503	0.051249	0.031953	0.012661	2
0.080226	0.13356	0.11317	0.11233	0.13546	0.10973	0.10498	0.12654	0.089628	0.11328	0.055172	0.078276	0.10674	0.073232	0.098394	0.14663	0.164	0.13903	0.12208	0.12474	0.011537	0.035088	0.057907	0.04846	0.068521	0.11082	0.085688	0.071872	0.052682	0.016113	0.004062	0.0084088	0.01791	0.061189	0.17109	0.12048	0.075601	0.053139	0.028991	0.012327	2
0.064375	0.097274	0.10939	0.1152	0.10897	0.13069	0.1005	0.11117	0.10438	0.12008	0.079195	0.060034	0.061754	0.089243	0.092245	0.096766	0.12799	0.16961	0.15024	0.13781	0.012579	0.027123	0.048639	0.065085	0.077664	0.076444	0.10211	0.055574	0.047325	0.018385	0.0060378	0.018657	0.016695	0.028967	0.088871	0.173	0.093093	0.051934	0.034422	0.015368	2
0.055376	0.082561	0.10611	0.095608	0.10093	0.11608	0.10617	0.09219	0.12145	0.090767	0.049052	0.055511	0.061068	0.09598	0.073639	0.095673	0.13482	0.14834	0.13436	0.11756	0.0099722	0.029685	0.046028	0.04337	0.059108	0.1103	0.064145	0.060005	0.041978	0.01569	0.0048488	0.010434	0.015048	0.0247	0.072106	0.17519	0.095545	0.043507	0.030294	0.0070653	2
0.056798	0.087294	0.11735	0.11416	0.10026	0.11878	0.11929	0.10299	0.13724	0.097697	0.072444	0.063792	0.059407	0.094459	0.088144	0.086479	0.11977	0.16419	0.14609	0.14368	0.008115	0.032157	0.053751	0.058786	0.064225	0.095835	0.08672	0.055676	0.050589	0.017304	0.003883	0.02011	0.020092	0.030957	0.063536	0.18248	0.097442	0.051392	0.035199	0.01229	2
0.053448	0.085755	0.098314	0.080847	0.10471	0.080802	0.068699	0.058934	0.088623	0.05939	0.014959	0.013859	0.015174	0.054453	0.3828	0.1885	0.044254	0.03438	0.026071	0.020833	0.0022305	0.0060142	0.040682	0.060549	0.068938	0.082244	0.07952	0.038854	0.0086344	0.0028426	0.0024371	0.0040704	0.011994	0.092756	0.089866	0.083009	0.069301	0.02148	0.0072316	0.0025702	3
0.081083	0.06165	0.063143	0.067513	0.101	0.082506	0.098641	0.10119	0.069983	0.060648	0.019963	0.013255	0.016716	0.031734	0.32315	0.22247	0.091932	0.03787	0.02581	0.01893	0.00062339	0.0036747	0.040307	0.074745	0.085158	0.075132	0.045529	0.051768	0.0144	0.0027467	0.001166	0.0088824	0.016103	0.057605	0.097041	0.09452	0.087518	0.020618	0.0083659	0.0022557	3
0.10023	0.08597	0.093006	0.099699	0.073182	0.062258	0.073134	0.064809	0.073692	0.089727	0.017447	0.014836	0.018436	0.015222	0.022818	0.2936	0.36619	0.044255	0.033946	0.023576	0.0015839	0.0061407	0.015943	0.072363	0.06035	0.059386	0.084272	0.074193	0.033598	0.0035197	0.0022247	0.0039585	0.0085338	0.070928	0.092296	0.085652	0.070912	0.060776	0.014488	0.0013909	3
0.068113	0.074889	0.065913	0.09169	0.069338	0.03898	0.037884	0.035995	0.040511	0.032225	0.020994	0.019142	0.017744	0.016116	0.14531	0.24445	0.034811	0.028759	0.019619	0.028783	0.00228	0.0061969	0.012453	0.024475	0.039734	0.076188	0.065999	0.041353	0.0078932	0.0029959	0.001239	0.0047718	0.028617	0.070546	0.071795	0.04134	0.032558	0.015014	0.0076683	0.0066567	3
0.065577	0.063662	0.10053	0.083071	0.099655	0.106	0.075278	0.064634	0.080538	0.065874	0.017554	0.01712	0.018923	0.20076	0.35917	0.080813	0.041293	0.031868	0.023597	0.023512	0.001462	0.0088627	0.054569	0.055117	0.087879	0.08343	0.062831	0.03482	0.0071244	0.0029327	0.0033742	0.0046074	0.022696	0.097939	0.090292	0.086915	0.062751	0.015548	0.0084956	0.0028201	3
0.098191	0.107	0.06158	0.063761	0.054467	0.031432	0.028867	0.028232	0.05218	0.039363	0.025707	0.0185	0.018292	0.072948	0.22579	0.11305	0.024516	0.029077	0.024166	0.020436	0.0018993	0.0094283	0.031879	0.02316	0.03301	0.052852	0.066716	0.048516	0.013352	0.0047821	0.0018449	0.0047423	0.038402	0.098054	0.055459	0.030536	0.037504	0.0092177	0.0071147	0.0017585	3
0.045116	0.025807	0.028181	0.032284	0.054304	0.038798	0.026327	0.054168	0.031861	0.028056	0.020886	0.079346	0.087267	0.032735	0.020392	0.020342	0.019552	0.021119	0.030557	0.031633	0.0029731	0.014194	0.024438	0.031735	0.030545	0.032409	0.0304	0.0095024	0.0054773	0.0038143	0.0020659	0.019946	0.022295	0.034336	0.030274	0.026028	0.01822	0.01759	0.0094249	0.0031065	3
0.091806	0.049086	0.080247	0.093659	0.10933	0.060564	0.061858	0.053567	0.034605	0.027919	0.031238	0.023882	0.019513	0.045452	0.24363	0.1879	0.046892	0.028644	0.023794	0.023605	0.0030612	0.0067338	0.017498	0.047746	0.054993	0.080681	0.057493	0.049041	0.010641	0.0033554	0.0042556	0.0099616	0.027091	0.058054	0.10841	0.074161	0.032059	0.012216	0.0057829	0.0012881	3
0.10157	0.10978	0.049367	0.066538	0.046277	0.02647	0.027219	0.028326	0.051017	0.039894	0.016738	0.021531	0.10556	0.21837	0.055642	0.030934	0.026888	0.021253	0.020886	0.03253	0.0017474	0.018609	0.022603	0.023318	0.049025	0.054586	0.070893	0.021123	0.01115	0.00404	0.0015386	0.012211	0.09241	0.054572	0.031154	0.044109	0.015739	0.011803	0.0063254	0.0052827	3
0.098124	0.11271	0.076663	0.059375	0.056297	0.036225	0.025529	0.026803	0.03937	0.050463	0.017645	0.03064	0.13613	0.22906	0.041803	0.033701	0.025556	0.021361	0.02404	0.032249	0.0025225	0.021644	0.019937	0.024624	0.052882	0.06495	0.068266	0.021953	0.011832	0.0025497	0.0013186	0.014958	0.09901	0.062738	0.031902	0.042375	0.016521	0.011654	0.0060973	0.0058881	3
0.051499	0.062612	0.050091	0.033338	0.030072	0.034922	0.046928	0.033275	0.028694	0.046918	0.021923	0.02517	0.025637	0.019198	0.032668	0.10218	0.13849	0.024078	0.019351	0.019066	0.0035304	0.0070693	0.016995	0.027427	0.037731	0.028421	0.029446	0.044302	0.015861	0.001907	0.0018818	0.005641	0.011536	0.046104	0.047422	0.034802	0.031728	0.020194	0.0084746	0.0026676	3
0.066199	0.098816	0.10414	0.085862	0.047939	0.060576	0.047911	0.031521	0.030192	0.041772	0.022114	0.03002	0.03575	0.02123	0.022705	0.036147	0.18667	0.19973	0.025015	0.034218	0.0018753	0.0076083	0.01403	0.025863	0.028119	0.058644	0.052204	0.073351	0.042248	0.0046237	0.0033035	0.01348	0.012162	0.019283	0.089946	0.092422	0.042119	0.02378	0.0088621	0.0023844	3
0.041076	0.044755	0.035561	0.027477	0.032465	0.027834	0.039856	0.047182	0.037798	0.026769	0.024544	0.024302	0.021993	0.027949	0.030746	0.054788	0.069037	0.042823	0.038691	0.030221	0.0018247	0.0087695	0.011835	0.021167	0.03211	0.038903	0.021211	0.026293	0.014924	0.0030091	0.0033827	0.0086779	0.010869	0.025366	0.034076	0.030209	0.028231	0.027583	0.010382	0.0020247	3
0.03676	0.031458	0.036488	0.041362	0.027083	0.028326	0.049411	0.0375	0.028403	0.033452	0.018722	0.020275	0.025618	0.033479	0.020419	0.041252	0.086984	0.051735	0.028172	0.02694	0.0018038	0.0053563	0.015543	0.01952	0.033383	0.035169	0.02908	0.022432	0.012778	0.0021284	0.0025211	0.0067815	0.011217	0.021418	0.034865	0.034821	0.031552	0.018427	0.0088453	0.0059429	3
0.093113	0.10774	0.092874	0.046542	0.061811	0.045057	0.029725	0.031435	0.043188	0.045715	0.023796	0.031432	0.022728	0.01796	0.037498	0.14804	0.2341	0.040298	0.034722	0.024647	0.001673	0.0072847	0.021262	0.029281	0.028657	0.050442	0.048376	0.072719	0.033334	0.006026	0.0047506	0.0072633	0.0093118	0.062184	0.098983	0.050448	0.02927	0.02592	0.0065702	0.0029875	3
0.061553	0.052115	0.034744	0.030845	0.041031	0.043642	0.023955	0.032109	0.043521	0.037255	0.022292	0.023596	0.027794	0.034675	0.020345	0.036533	0.10428	0.092887	0.020631	0.020286	0.0021426	0.01038	0.014812	0.022859	0.031819	0.035807	0.025273	0.025784	0.03069	0.0021675	0.0019862	0.0082161	0.012207	0.030631	0.044285	0.036667	0.032915	0.022572	0.0085955	0.002353	3
0.051102	0.032913	0.031271	0.033734	0.049549	0.029695	0.025219	0.050092	0.03532	0.029723	0.02315	0.035637	0.020841	0.026822	0.086054	0.091791	0.0332	0.019256	0.020665	0.018397	0.0013124	0.01327	0.013207	0.029018	0.033311	0.034013	0.022152	0.029008	0.0066157	0.0017928	0.0023735	0.0069702	0.01727	0.034541	0.039815	0.037414	0.025964	0.012991	0.0071829	0.0020479	3
0.10801	0.074195	0.050402	0.054141	0.043339	0.028351	0.03111	0.04608	0.036336	0.020389	0.017937	0.021307	0.024619	0.022322	0.019117	0.023716	0.11608	0.19009	0.035119	0.024957	0.0017859	0.0051065	0.010892	0.021301	0.031879	0.029243	0.037419	0.040421	0.059764	0.0066299	0.0021514	0.0055587	0.0092594	0.032351	0.089516	0.04549	0.028095	0.024086	0.0069074	0.0028496	3
0.058196	0.041658	0.030698	0.033356	0.045441	0.032167	0.022077	0.04656	0.040442	0.033042	0.022533	0.023243	0.03487	0.025522	0.022256	0.070496	0.10508	0.051596	0.017144	0.01948	0.002042	0.010159	0.015459	0.023516	0.03309	0.03536	0.026919	0.024274	0.022699	0.0019011	0.0025227	0.0066304	0.012021	0.035758	0.036917	0.040379	0.029747	0.018989	0.0081654	0.0024504	3
0.048547	0.030443	0.033245	0.046447	0.034112	0.020003	0.047759	0.042345	0.032678	0.030146	0.019778	0.019638	0.025714	0.032568	0.022059	0.041047	0.093025	0.066649	0.025275	0.02455	0.0010871	0.0052532	0.017156	0.018138	0.037196	0.033236	0.029896	0.021302	0.018572	0.0020179	0.0030295	0.0060912	0.011501	0.026015	0.036447	0.038631	0.030909	0.02006	0.0090736	0.0048255	3
0.081555	0.048654	0.064974	0.088	0.050369	0.072459	0.096538	0.10576	0.081056	0.053548	0.027079	0.023793	0.024545	0.024585	0.039757	0.21792	0.25958	0.067423	0.030578	0.050656	0.0019091	0.0059873	0.027246	0.060005	0.076457	0.056766	0.061205	0.04929	0.018493	0.0161	0.0011811	0.0059539	0.012845	0.04427	0.070969	0.073634	0.10115	0.056686	0.0070642	0.002421	3
0.10126	0.050341	0.048975	0.080841	0.079017	0.052518	0.092464	0.10056	0.10838	0.052658	0.0274	0.026536	0.024591	0.027003	0.021256	0.15807	0.30536	0.10921	0.031601	0.045548	0.002876	0.0061822	0.020553	0.06567	0.080008	0.056069	0.062146	0.046706	0.033174	0.013152	0.0012088	0.0054567	0.012487	0.058314	0.048664	0.087089	0.079778	0.078706	0.010049	0.001921	3
0.034659	0.036241	0.037225	0.036481	0.082145	0.096556	0.053555	0.058906	0.085305	0.072763	0.022852	0.025945	0.017706	0.022804	0.1719	0.1931	0.029443	0.032457	0.043994	0.041665	0.0038651	0.0082965	0.031415	0.058924	0.058295	0.056168	0.042884	0.02446	0.0093041	0.0018008	0.00088165	0.0062168	0.016341	0.029495	0.047413	0.066064	0.077357	0.038094	0.0080296	0.0071605	3
0.11274	0.063173	0.05194	0.075083	0.085192	0.046128	0.09127	0.098663	0.1113	0.052681	0.025581	0.023917	0.025726	0.01952	0.15175	0.32569	0.11793	0.033666	0.046143	0.044301	0.0015999	0.0073991	0.03277	0.080383	0.067159	0.060543	0.058998	0.050825	0.017861	0.015736	0.0018345	0.0061776	0.021918	0.062255	0.077116	0.075286	0.10525	0.036563	0.0076979	0.0035739	3
0.070493	0.099677	0.053912	0.047192	0.079466	0.084619	0.045113	0.090145	0.09932	0.10717	0.029041	0.024596	0.024415	0.026765	0.020937	0.15449	0.31988	0.097005	0.036276	0.051351	0.0023377	0.010778	0.023463	0.07797	0.06305	0.060158	0.054238	0.055891	0.028698	0.012171	0.0024769	0.0045078	0.010672	0.047509	0.064571	0.080949	0.065082	0.091591	0.018019	0.0024886	3
0.066225	0.061471	0.09688	0.11579	0.1091	0.1242	0.090608	0.071993	0.097562	0.075964	0.027932	0.02761	0.039196	0.062817	0.13876	0.37887	0.21256	0.019698	0.018584	0.018037	0.0014981	0.0069925	0.016542	0.077936	0.10558	0.11693	0.10055	0.020411	0.0062124	0.0019843	0.0019605	0.010534	0.044731	0.060312	0.092601	0.093361	0.063479	0.061875	0.02179	0.0023374	3
0.10751	0.057434	0.056687	0.046173	0.0411	0.045192	0.10154	0.10961	0.06294	0.087966	0.036119	0.053822	0.029952	0.032968	0.095287	0.35705	0.093504	0.017588	0.018695	0.027948	0.0042235	0.0097175	0.051963	0.059561	0.073892	0.042679	0.049963	0.055909	0.0090203	0.0035227	0.0014452	0.0075624	0.033613	0.071886	0.064947	0.042163	0.072577	0.055152	0.00912	0.0033672	3
0.10744	0.124	0.089198	0.074156	0.10224	0.075847	0.10532	0.082223	0.05246	0.045835	0.029768	0.026925	0.039178	0.036338	0.13857	0.46934	0.11558	0.015753	0.017102	0.017962	0.0020459	0.0071562	0.017993	0.051806	0.079851	0.098975	0.099135	0.062204	0.0037949	0.0017535	0.0047585	0.014479	0.046462	0.086349	0.072329	0.081047	0.088324	0.029895	0.0058145	0.0013325	3
0.08176	0.094832	0.084454	0.10825	0.061854	0.059698	0.046207	0.046657	0.047533	0.097444	0.028918	0.029725	0.025728	0.026281	0.037429	0.038068	0.30735	0.19716	0.021416	0.014521	0.002065	0.014808	0.014503	0.049229	0.04433	0.052067	0.070991	0.079674	0.033634	0.0020442	0.0023717	0.0074153	0.013102	0.051183	0.089531	0.092227	0.04229	0.028238	0.039379	0.0015576	3
0.10507	0.064914	0.055807	0.048998	0.052096	0.049365	0.09067	0.1256	0.064746	0.079777	0.033146	0.03371	0.045142	0.044285	0.033491	0.029627	0.29966	0.18127	0.022244	0.013994	0.0039682	0.0087633	0.032794	0.054573	0.077829	0.053337	0.049086	0.051019	0.041647	0.0022726	0.0019854	0.0059966	0.016369	0.067733	0.066293	0.061877	0.055785	0.069856	0.030165	0.001788	3
0.073128	0.083883	0.065065	0.045319	0.043174	0.064983	0.046092	0.034046	0.050091	0.039295	0.018615	0.021345	0.016403	0.1085	0.17509	0.099948	0.031344	0.019847	0.028399	0.036343	0.0027259	0.0069843	0.014387	0.029727	0.054333	0.058731	0.071504	0.023135	0.0084543	0.002434	0.0021994	0.0087959	0.054393	0.049407	0.036124	0.047471	0.035792	0.021619	0.0082079	0.0065264	3
0.073751	0.067319	0.094941	0.083895	0.090356	0.11883	0.12508	0.078736	0.080745	0.064086	0.034214	0.029601	0.053491	0.22493	0.30932	0.14137	0.024506	0.028657	0.024326	0.0252	0.0021788	0.0058944	0.035985	0.095073	0.12168	0.09624	0.053691	0.013532	0.0085503	0.0024885	0.0053296	0.014623	0.065219	0.065297	0.080572	0.08774	0.064229	0.041703	0.0066818	0.0028357	3
0.041263	0.054206	0.061665	0.029804	0.055302	0.038279	0.032857	0.041692	0.034087	0.059092	0.022791	0.026781	0.025316	0.025434	0.04319	0.093533	0.0972	0.060975	0.023265	0.036735	0.0025135	0.0073912	0.019602	0.022252	0.041025	0.036362	0.050255	0.037564	0.0058875	0.0033702	0.0023829	0.0063375	0.019799	0.032766	0.04699	0.04088	0.02109	0.026558	0.024241	0.003287	3
0.076488	0.053825	0.045584	0.053024	0.062801	0.037701	0.0439	0.039462	0.036287	0.04015	0.027483	0.021638	0.036035	0.12435	0.12142	0.049467	0.021101	0.024408	0.037414	0.027612	0.0049777	0.01046	0.015688	0.026435	0.044682	0.063721	0.053036	0.015618	0.0097933	0.0026696	0.001542	0.018228	0.042655	0.034199	0.049814	0.043579	0.024136	0.017572	0.011755	0.0027211	3
0.097462	0.08577	0.092716	0.11678	0.12205	0.083237	0.073034	0.065191	0.042861	0.041083	0.035563	0.066034	0.19569	0.28152	0.1015	0.023801	0.023714	0.02414	0.029604	0.036515	0.0021148	0.0055541	0.03134	0.072423	0.13284	0.099587	0.035961	0.013291	0.016172	0.0025879	0.0058152	0.053527	0.063157	0.084204	0.078999	0.06542	0.036355	0.014349	0.0081412	0.0036801	3
0.093502	0.08628	0.041079	0.044867	0.040646	0.036888	0.057484	0.052095	0.053014	0.057493	0.034972	0.035104	0.083004	0.080884	0.060749	0.12212	0.077899	0.025029	0.029964	0.027823	0.0042063	0.031275	0.028841	0.023502	0.042719	0.041842	0.036688	0.055978	0.01756	0.002096	0.0039743	0.010167	0.015646	0.087546	0.054341	0.054268	0.032543	0.011781	0.014229	0.0014462	3
0.03213	0.048791	0.033059	0.045257	0.056599	0.0511	0.060258	0.047945	0.06803	0.056817	0.02825	0.028835	0.071027	0.17106	0.056486	0.043716	0.020905	0.023156	0.024572	0.03087	0.0018342	0.016734	0.058523	0.039869	0.037934	0.032691	0.034919	0.018744	0.0068726	0.0025903	0.0041041	0.0058901	0.021104	0.043692	0.052223	0.05071	0.049349	0.017515	0.0052855	0.0015111	3
0.049618	0.04066	0.071418	0.09504	0.063341	0.033269	0.062687	0.090393	0.081646	0.035002	0.030781	0.024948	0.028344	0.021035	0.025732	0.030496	0.11201	0.12488	0.13306	0.094411	0.0031878	0.0088679	0.018744	0.027317	0.062394	0.04695	0.032135	0.066119	0.037496	0.011599	0.0013956	0.0073244	0.01389	0.024631	0.028327	0.06027	0.085661	0.079306	0.0095596	0.0023332	3
0.034267	0.03953	0.04256	0.070975	0.043974	0.038594	0.083109	0.094762	0.051808	0.033234	0.019895	0.026815	0.029913	0.027063	0.0246	0.044284	0.045571	0.14015	0.1482	0.025646	0.0020136	0.0057681	0.012542	0.018454	0.04282	0.089666	0.040554	0.032836	0.015166	0.0042242	0.0024063	0.0081325	0.015216	0.018272	0.038492	0.041795	0.03217	0.083766	0.022945	0.0025374	3
0.095669	0.053855	0.032047	0.080922	0.086076	0.071189	0.028369	0.0443	0.033166	0.045995	0.029031	0.027521	0.031618	0.059924	0.055605	0.1407	0.088829	0.093673	0.034577	0.023395	0.0032698	0.01343	0.025263	0.031362	0.032995	0.062152	0.037532	0.028866	0.046041	0.0043307	0.0018223	0.0066583	0.014302	0.042001	0.090075	0.084784	0.026681	0.012011	0.0052166	0.0033326	3
0.057281	0.039126	0.026951	0.026465	0.034289	0.052742	0.050596	0.050516	0.054091	0.046384	0.0203	0.022294	0.029652	0.043872	0.12811	0.0863	0.064051	0.01921	0.016426	0.015507	0.003827	0.01173	0.026562	0.040409	0.046564	0.02624	0.017033	0.035323	0.011917	0.0011544	0.0015345	0.0056385	0.012795	0.037923	0.044212	0.052658	0.040681	0.016917	0.0053478	0.0019518	3
0.061838	0.047127	0.026232	0.024794	0.028511	0.046643	0.058391	0.047297	0.054394	0.046983	0.017125	0.022857	0.031648	0.087952	0.12433	0.080796	0.032562	0.014511	0.014641	0.020392	0.0029445	0.011928	0.033923	0.042652	0.034983	0.019677	0.026606	0.041687	0.0046038	0.0015988	0.0011379	0.0049323	0.024169	0.037905	0.042551	0.051937	0.036176	0.014205	0.0051024	0.0018476	3
0.036513	0.031508	0.026586	0.048838	0.064883	0.056945	0.048276	0.028586	0.029083	0.031187	0.013587	0.014306	0.013844	0.019312	0.026616	0.12638	0.12942	0.044447	0.01475	0.013254	0.0013492	0.0057448	0.012901	0.019018	0.020478	0.0715	0.038834	0.02431	0.0055823	0.0012276	0.0010734	0.0038172	0.010552	0.028061	0.037349	0.047003	0.041205	0.024725	0.0053763	0.0014271	3
0.037582	0.036277	0.029892	0.031539	0.036312	0.037248	0.031093	0.026091	0.046426	0.067042	0.011978	0.014239	0.015715	0.027087	0.13138	0.12383	0.025851	0.01319	0.013351	0.0155	0.00123	0.0044453	0.027689	0.040814	0.035903	0.025497	0.026033	0.024015	0.0045005	0.0015053	0.0008515	0.0032149	0.017432	0.035899	0.026125	0.035592	0.031322	0.032322	0.0056095	0.0019514	3
0.028974	0.03081	0.038578	0.033441	0.032259	0.032416	0.05657	0.068541	0.054041	0.036466	0.013009	0.014101	0.014989	0.017718	0.02654	0.065943	0.15676	0.07705	0.017513	0.012696	0.0014172	0.0044237	0.0081177	0.0182	0.073934	0.038796	0.032687	0.01969	0.0077592	0.0019009	0.0015397	0.0032498	0.009243	0.023692	0.031922	0.031889	0.04503	0.039404	0.01868	0.0021614	3
0.027624	0.028086	0.040326	0.054585	0.050077	0.052381	0.052869	0.049871	0.061399	0.049154	0.020295	0.021635	0.023831	0.028763	0.055281	0.12592	0.11484	0.036144	0.029091	0.016552	0.0017976	0.0080688	0.022107	0.041307	0.042041	0.047006	0.04384	0.016169	0.0085777	0.0021806	0.0017282	0.0050353	0.00786	0.024049	0.049756	0.053172	0.051612	0.023703	0.011792	0.0043207	3
0.033418	0.038914	0.038553	0.032062	0.030194	0.054537	0.065714	0.056782	0.041877	0.027616	0.015206	0.015305	0.014338	0.018044	0.024832	0.079189	0.15165	0.075329	0.016909	0.012237	0.0020552	0.0044372	0.0087643	0.015102	0.054782	0.057685	0.035039	0.021644	0.009487	0.001699	0.0016727	0.0039779	0.011557	0.022999	0.037992	0.039667	0.043605	0.035779	0.011439	0.0016421	3
0.052723	0.027149	0.026311	0.031809	0.046267	0.060922	0.049542	0.052288	0.047024	0.060189	0.017748	0.019108	0.020559	0.02399	0.033197	0.069522	0.15096	0.063446	0.043157	0.016907	0.0025777	0.0085778	0.018447	0.033403	0.042499	0.050775	0.027692	0.014087	0.023067	0.0070052	0.0016543	0.0043013	0.0080391	0.015508	0.042342	0.052469	0.051461	0.039373	0.0084546	0.002835	3
0.042748	0.062689	0.06032	0.050026	0.029885	0.027571	0.029924	0.04423	0.05854	0.051704	0.015205	0.016724	0.018891	0.024131	0.062763	0.15735	0.11252	0.036229	0.016997	0.014162	0.0014403	0.0073898	0.022411	0.044667	0.026066	0.019299	0.050008	0.052706	0.0043991	0.0015502	0.0014201	0.0045612	0.010627	0.04228	0.0464	0.045221	0.042941	0.029553	0.0058799	0.001283	3
0.037504	0.033708	0.028053	0.031495	0.038576	0.04047	0.034484	0.026953	0.049929	0.064015	0.013141	0.013531	0.01192	0.014031	0.014838	0.022718	0.087652	0.16066	0.03492	0.013873	0.0013249	0.0039233	0.0060326	0.025771	0.047225	0.03714	0.023447	0.021334	0.024068	0.0016469	0.00093834	0.0037067	0.0058422	0.017556	0.037964	0.02662	0.034344	0.030509	0.031897	0.0030819	3
0.059681	0.10642	0.073267	0.053553	0.071915	0.09483	0.053291	0.076402	0.096039	0.11392	0.022463	0.027046	0.021745	0.039277	0.28715	0.2435	0.047028	0.034354	0.058278	0.038161	0.0013058	0.0057241	0.067423	0.065308	0.060857	0.066067	0.059936	0.04088	0.028674	0.002764	0.0018922	0.0073197	0.02327	0.06683	0.055044	0.091353	0.088343	0.049976	0.011204	0.0040267	3
0.079079	0.093636	0.048679	0.041803	0.031777	0.038724	0.041609	0.043038	0.090358	0.09528	0.02	0.028036	0.01581	0.020104	0.19756	0.20116	0.031839	0.033731	0.046284	0.026492	0.0024874	0.0079311	0.032547	0.052116	0.046982	0.040667	0.071817	0.042934	0.0060099	0.0017251	0.0018368	0.0080861	0.036111	0.060648	0.039197	0.037037	0.046599	0.043584	0.024345	0.0052252	3
0.039512	0.030677	0.036215	0.034232	0.051605	0.09209	0.086436	0.052967	0.060102	0.090845	0.020283	0.021872	0.02283	0.015601	0.035503	0.22565	0.14194	0.029221	0.041272	0.041689	0.0037722	0.0067311	0.024889	0.057732	0.056078	0.051283	0.044376	0.030647	0.0094805	0.0026915	0.00088001	0.0037607	0.011062	0.031627	0.036573	0.060476	0.05106	0.077087	0.010597	0.0020982	3
0.058374	0.03916	0.036887	0.039922	0.039486	0.0391	0.081807	0.102	0.048125	0.057811	0.020097	0.026556	0.019281	0.015559	0.10328	0.23032	0.036781	0.030613	0.053152	0.031803	0.0023602	0.0063556	0.023513	0.050398	0.060055	0.049538	0.035682	0.036298	0.0071067	0.0023044	0.0030425	0.0042771	0.022935	0.036234	0.03789	0.044881	0.062186	0.043748	0.016264	0.0039454	3
0.03604	0.03518	0.035516	0.077875	0.10769	0.05417	0.053436	0.083032	0.082079	0.053546	0.02569	0.024714	0.031711	0.021264	0.024257	0.17319	0.21056	0.033727	0.03381	0.049246	0.0037742	0.0095249	0.017508	0.048647	0.067637	0.061486	0.046557	0.040442	0.012076	0.0025997	0.0019042	0.0080254	0.0097442	0.027552	0.044661	0.074447	0.070292	0.06538	0.0078792	0.0022244	3
0.058135	0.086154	0.090865	0.10597	0.10757	0.071438	0.095833	0.12172	0.13993	0.14414	0.011069	0.075983	0.31507	0.28619	0.19039	0.088967	0.03341	0.012096	0.011618	0.010603	0.0013875	0.0126	0.10943	0.16061	0.085484	0.114	0.019205	0.0056461	0.0032978	0.0011616	0.00095362	0.049997	0.054627	0.091603	0.087912	0.074623	0.090152	0.052006	0.0096134	0.0014189	3
0.057127	0.06549	0.056016	0.067237	0.062092	0.089414	0.090955	0.10592	0.10401	0.075627	0.011374	0.010357	0.085955	0.33837	0.21947	0.060864	0.012845	0.012804	0.010631	0.010109	0.0023327	0.01551	0.064258	0.11966	0.064092	0.054983	0.048231	0.017602	0.0029151	0.00078453	0.0010615	0.0039502	0.050058	0.075665	0.078052	0.063576	0.099108	0.010923	0.0033848	0.0014045	3
0.063127	0.087813	0.090786	0.10031	0.11375	0.07241	0.091648	0.11728	0.1433	0.14235	0.012838	0.012784	0.067635	0.30693	0.29451	0.19875	0.092931	0.032628	0.01281	0.010712	0.0013163	0.0041876	0.047212	0.17915	0.092111	0.12744	0.051167	0.011595	0.0035361	0.0011309	0.0011621	0.018141	0.071471	0.057602	0.11132	0.074378	0.083573	0.073002	0.024495	0.0017501	3
0.029786	0.044797	0.064023	0.055857	0.064639	0.062282	0.073482	0.092859	0.091056	0.12355	0.0082629	0.032209	0.23253	0.27146	0.10695	0.023354	0.012756	0.0094354	0.0091623	0.0084088	0.00050209	0.032786	0.12828	0.046676	0.057438	0.049676	0.032168	0.0058303	0.0019811	0.0010403	0.00064059	0.0058014	0.043831	0.064172	0.087095	0.059047	0.070569	0.020886	0.0034672	0.001178	3
0.05229	0.06761	0.061329	0.086092	0.092205	0.096398	0.11667	0.07383	0.091462	0.11561	0.01267	0.011084	0.066253	0.33839	0.27284	0.098102	0.017865	0.013101	0.011069	0.010724	0.0014597	0.0062359	0.093492	0.078389	0.12857	0.053173	0.050532	0.012188	0.0037638	0.0010517	0.00090238	0.006084	0.05497	0.081816	0.060013	0.10987	0.07259	0.037496	0.0039361	0.0010337	3
0.10364	0.12856	0.13564	0.14286	0.13726	0.18828	0.1714	0.11924	0.10146	0.087726	0.014457	0.11451	0.24105	0.20121	0.17086	0.25074	0.21182	0.094327	0.024693	0.012584	0.00027824	0.0029928	0.0053496	0.091605	0.27171	0.24477	0.029549	0.0067147	0.003009	0.0014623	0.013288	0.062629	0.085698	0.10404	0.090261	0.088761	0.095649	0.071451	0.041134	0.0037814	3
0.084946	0.095008	0.094433	0.11715	0.070143	0.087643	0.11581	0.14461	0.14661	0.14803	0.012727	0.03324	0.24526	0.31291	0.25071	0.14423	0.080411	0.016607	0.011755	0.0094613	0.0014093	0.006649	0.072317	0.20191	0.099506	0.1264	0.044372	0.0058621	0.003392	0.0011968	0.0015881	0.049807	0.055687	0.10286	0.079127	0.08254	0.092975	0.072004	0.019322	0.0012905	3
0.073767	0.098988	0.12333	0.1382	0.1429	0.13454	0.17663	0.17626	0.11896	0.10014	0.017326	0.11688	0.25585	0.21039	0.16543	0.23657	0.19999	0.08467	0.014785	0.010616	0.00044322	0.004011	0.015419	0.1423	0.2873	0.17789	0.014169	0.0054773	0.0028049	0.0010779	0.011895	0.057395	0.069913	0.093809	0.10802	0.085907	0.08963	0.087687	0.039381	0.0021963	3
0.13833	0.14555	0.15255	0.197	0.13134	0.10851	0.095511	0.091498	0.12331	0.090591	0.010204	0.010813	0.05416	0.11986	0.15697	0.20547	0.30539	0.23202	0.16923	0.023888	0.00078292	0.0017715	0.016508	0.037799	0.074567	0.16381	0.26558	0.064468	0.0048573	0.0012921	0.0012122	0.022452	0.080091	0.091559	0.08889	0.0968	0.085622	0.1042	0.054776	0.010685	3
0.09395	0.11975	0.14382	0.14354	0.13569	0.16798	0.18655	0.12593	0.10456	0.091354	0.012974	0.019901	0.13088	0.24291	0.19841	0.16773	0.25139	0.19863	0.082203	0.019095	0.0010711	0.0031117	0.0064018	0.040054	0.21997	0.26832	0.11102	0.0075238	0.0030606	0.00092662	0.0030234	0.043897	0.071761	0.094835	0.10802	0.086266	0.092004	0.088551	0.055226	0.014931	3
0.045197	0.049359	0.0635	0.060337	0.055525	0.036327	0.020522	0.024158	0.058753	0.071365	0.0080947	0.01023	0.050499	0.17072	0.14918	0.06299	0.01154	0.012531	0.009868	0.0088967	0.00090749	0.0021976	0.035755	0.04671	0.052202	0.057217	0.03656	0.007474	0.0030671	0.00087459	0.00052575	0.012664	0.043542	0.051137	0.042123	0.01757	0.039849	0.031344	0.0046929	0.00093229	3
0.020549	0.016874	0.036818	0.049534	0.06159	0.056367	0.058935	0.044035	0.028227	0.01591	0.0089274	0.0074253	0.01287	0.11336	0.15794	0.047124	0.012036	0.009929	0.009365	0.0087036	0.00069273	0.0040551	0.014116	0.043998	0.053475	0.047361	0.017562	0.0080509	0.0036661	0.001455	0.00075455	0.0015472	0.012691	0.035357	0.054101	0.050278	0.027975	0.0068829	0.0012922	0.0010557	3
0.02505	0.018584	0.018289	0.025218	0.026887	0.031404	0.024199	0.016625	0.034584	0.047081	0.021794	0.010748	0.063133	0.092115	0.019807	0.011617	0.012214	0.013277	0.011849	0.011336	0.00083607	0.018855	0.02175	0.017264	0.031914	0.02112	0.0104	0.0064087	0.0036123	0.001369	0.0080421	0.0051378	0.0082822	0.018339	0.026314	0.029122	0.027377	0.0064634	0.0032601	0.00079984	3
0.024644	0.028414	0.027428	0.016593	0.026279	0.046906	0.052692	0.062122	0.05972	0.052437	0.0042819	0.0071025	0.02432	0.17746	0.11495	0.021828	0.012449	0.011024	0.010889	0.0089748	0.00066751	0.0046189	0.052427	0.054237	0.028501	0.018201	0.026448	0.0072685	0.0036275	0.0011924	0.00010904	0.003685	0.017627	0.02165	0.036742	0.055577	0.04629	0.013369	0.0024408	0.00037629	3
0.014894	0.027478	0.025741	0.033613	0.023697	0.01694	0.033665	0.047437	0.057409	0.058559	0.0071064	0.0067248	0.0070298	0.10124	0.13514	0.033457	0.014823	0.013652	0.011814	0.011721	0.00088873	0.0074297	0.03976	0.043441	0.017	0.028219	0.023849	0.0069976	0.0036297	0.0013771	0.00088261	0.0017822	0.011449	0.022492	0.023939	0.037046	0.049976	0.018081	0.0032563	0.00095494	3
0.029464	0.040217	0.035899	0.020531	0.033601	0.03442	0.022372	0.029373	0.026068	0.039919	0.0088366	0.0084677	0.0082186	0.010915	0.041156	0.11224	0.086982	0.029416	0.0098482	0.0060107	0.0011117	0.0025751	0.0089361	0.024004	0.02279	0.03409	0.038117	0.019917	0.0033909	0.00087439	0.0007957	0.0024923	0.012867	0.030678	0.022297	0.026468	0.023479	0.030219	0.0063443	0.00090354	3
0.035636	0.038171	0.026708	0.037599	0.042222	0.024736	0.028533	0.038384	0.023135	0.029843	0.008036	0.010873	0.009637	0.010141	0.015409	0.077883	0.11162	0.060781	0.020627	0.0080783	0.001255	0.0033456	0.0041132	0.012006	0.031806	0.04023	0.037402	0.028308	0.0048399	0.00080472	0.00084725	0.0022748	0.0083341	0.031056	0.027942	0.033162	0.019657	0.022621	0.01594	0.0015031	3
0.027918	0.03733	0.037775	0.021984	0.033899	0.036316	0.023661	0.030465	0.027185	0.038672	0.0070299	0.010529	0.01024	0.011581	0.012225	0.047906	0.11009	0.077363	0.022089	0.008704	0.00066746	0.0025375	0.0055945	0.022549	0.021794	0.03092	0.036621	0.031803	0.0046546	0.00092523	0.00090086	0.0027054	0.0066509	0.023618	0.030834	0.021849	0.024964	0.029466	0.014971	0.0011252	3
0.038425	0.026065	0.030979	0.025524	0.037802	0.035897	0.026752	0.034522	0.040277	0.022711	0.0097698	0.010071	0.007794	0.014876	0.11092	0.12646	0.021179	0.011052	0.0081361	0.0086815	0.0009508	0.0029377	0.0073359	0.036193	0.033767	0.028799	0.025527	0.019604	0.0034714	0.0014875	0.0011054	0.002907	0.018063	0.023378	0.035415	0.028426	0.030441	0.017067	0.0032632	0.0008045	3
0.023637	0.032509	0.026237	0.035784	0.037581	0.026991	0.033504	0.040598	0.023807	0.026948	0.0092747	0.009243	0.0096933	0.012228	0.084875	0.13183	0.033161	0.013473	0.007909	0.0074208	0.00065056	0.002852	0.0074829	0.028451	0.037295	0.033425	0.024722	0.015479	0.0026079	0.0010639	0.00083085	0.0030138	0.0091266	0.028207	0.03464	0.027071	0.029928	0.014535	0.006415	0.00072309	3
0.016157	0.016859	0.02428	0.031397	0.027614	0.0372	0.04513	0.048311	0.046104	0.048211	0.0080178	0.0076441	0.0073665	0.013271	0.013318	0.085404	0.15925	0.036612	0.010662	0.0081053	0.001639	0.0029584	0.0072708	0.035579	0.044866	0.031792	0.026029	0.016375	0.0039222	0.0012321	0.00073028	0.0022045	0.0048122	0.010997	0.021319	0.034486	0.043714	0.042125	0.0093963	0.00078045	3
0.03345	0.02984	0.031248	0.042501	0.04497	0.046125	0.046103	0.048653	0.05576	0.055722	0.0085789	0.0072075	0.0081204	0.0097926	0.015921	0.015274	0.086284	0.20432	0.079951	0.0098349	0.0011889	0.0016073	0.0050525	0.02199	0.051524	0.044959	0.041066	0.024891	0.02097	0.0039187	0.00058581	0.0022126	0.0044871	0.010622	0.032429	0.040323	0.046562	0.043424	0.03334	0.0036721	3
0.037219	0.019737	0.01671	0.017043	0.027588	0.030602	0.027963	0.036682	0.045611	0.047124	0.0085132	0.00764	0.0087046	0.013493	0.012482	0.090567	0.12928	0.022628	0.010729	0.0090808	0.0011055	0.0026179	0.0066977	0.03901	0.030967	0.027846	0.017699	0.019174	0.0092699	0.00083805	0.0010093	0.0028218	0.007119	0.021833	0.016156	0.022907	0.034022	0.039795	0.0093387	0.00078768	3
0.027486	0.040174	0.046259	0.047982	0.046174	0.046103	0.051753	0.058863	0.046949	0.04323	0.0086326	0.0080585	0.0099212	0.012057	0.013445	0.025779	0.17951	0.1586	0.016653	0.0077815	0.00022896	0.0026051	0.0047361	0.02742	0.051165	0.04726	0.045308	0.035467	0.012807	0.00096159	0.00056381	0.0027023	0.0061784	0.016758	0.041866	0.048603	0.044138	0.046181	0.021614	0.00096287	3
0.044291	0.046631	0.047197	0.048045	0.057454	0.058876	0.043847	0.049718	0.060719	0.057378	0.0062384	0.007452	0.0099141	0.011622	0.013058	0.013986	0.13811	0.2272	0.086958	0.011418	0.00010162	0.0021063	0.0048406	0.022593	0.057221	0.047945	0.051769	0.040483	0.029379	0.0011956	0.00033469	0.0023862	0.0057642	0.01714	0.048018	0.047941	0.045714	0.052712	0.031426	0.0069537	3
0.032549	0.037569	0.047784	0.056963	0.056001	0.053813	0.052744	0.053913	0.048984	0.055719	0.0095279	0.011058	0.014784	0.054558	0.16578	0.1923	0.035501	0.0080951	0.0069583	0.0053847	0.0012557	0.0057112	0.030296	0.041703	0.054421	0.055111	0.038077	0.01802	0.0037304	0.00063623	0.0011562	0.0042609	0.012587	0.039368	0.055112	0.061049	0.048869	0.021868	0.0027584	0.00032058	3
0.030683	0.032936	0.039564	0.051425	0.056893	0.056762	0.056565	0.050595	0.054426	0.051231	0.0064232	0.010958	0.011391	0.015166	0.058036	0.17002	0.17933	0.025933	0.0064825	0.0057543	0.0011324	0.0028914	0.01782	0.036192	0.054716	0.054602	0.041587	0.022001	0.0089464	0.00082153	0.00035082	0.0035869	0.0058828	0.026488	0.045893	0.05899	0.058577	0.034248	0.0080874	0.00025473	3
0.055206	0.05487	0.054905	0.051851	0.054096	0.066568	0.066906	0.061	0.045313	0.056304	0.011639	0.013419	0.012288	0.037499	0.19766	0.16985	0.11174	0.013016	0.0065582	0.0060792	0.0013171	0.0036271	0.02475	0.050235	0.061592	0.052727	0.052169	0.034236	0.0027542	7.1444e-05	0.0011879	0.0021894	0.02265	0.059484	0.053195	0.049562	0.057716	0.033047	0.0035476	0.0010539	3
0.055582	0.057728	0.055518	0.056634	0.051027	0.060835	0.071033	0.062167	0.046096	0.047516	0.012893	0.0093081	0.0207	0.11478	0.18113	0.19522	0.032541	0.0095471	0.0061556	0.0047346	0.00096743	0.0043864	0.028579	0.054881	0.062643	0.046529	0.053912	0.027094	0.0018893	0.00039563	0.00088709	0.002538	0.034746	0.061333	0.054054	0.048338	0.057561	0.019879	0.0020217	0.00070682	3
0.043114	0.03205	0.033977	0.040625	0.055317	0.060232	0.056023	0.054192	0.052179	0.053463	0.0084277	0.010899	0.012997	0.022603	0.14775	0.20031	0.060653	0.010934	0.0068105	0.0072858	0.00068736	0.002898	0.022513	0.052342	0.054999	0.046824	0.025	0.026095	0.0070121	0.00091666	0.00072308	0.0039029	0.01174	0.035262	0.043719	0.058398	0.058027	0.024494	0.0033605	0.00072768	3
0.042365	0.036375	0.043165	0.049155	0.046317	0.034909	0.03446	0.041503	0.051395	0.041507	0.0086311	0.010392	0.034796	0.15415	0.1438	0.03217	0.013383	0.011439	0.0091616	0.0070924	0.00064168	0.0038655	0.033004	0.046616	0.041224	0.03628	0.031416	0.012824	0.0035614	0.0010716	0.0010142	0.0050125	0.030944	0.045305	0.038363	0.034772	0.038325	0.013464	0.0021063	0.00080643	3
0.044189	0.044056	0.037576	0.044332	0.048619	0.045726	0.033521	0.036541	0.045142	0.05149	0.0061211	0.0094782	0.010444	0.024527	0.13845	0.17715	0.048402	0.014759	0.010485	0.0091695	0.00075995	0.0025213	0.016158	0.046659	0.041356	0.036664	0.035074	0.029513	0.0054705	0.00066693	0.00079073	0.0023815	0.013718	0.042809	0.04724	0.038786	0.033272	0.030394	0.0051259	0.0011186	3
0.040327	0.039936	0.051313	0.048076	0.036741	0.035573	0.038849	0.052378	0.04214	0.029294	0.0054093	0.0096737	0.018875	0.1104	0.1644	0.062518	0.015733	0.011504	0.010774	0.0065586	0.0007337	0.0022135	0.018415	0.049967	0.043197	0.040865	0.033993	0.01437	0.0039443	0.0007365	0.00078513	0.0033975	0.031395	0.045588	0.034488	0.036086	0.036738	0.01533	0.0030625	0.00031425	3
0.034838	0.038048	0.051488	0.04787	0.032816	0.023187	0.038212	0.046302	0.042446	0.020926	0.0075481	0.0093567	0.0087256	0.054886	0.10563	0.10168	0.050408	0.02706	0.014291	0.004747	0.00036034	0.0021513	0.0059368	0.027119	0.045515	0.050624	0.043535	0.0086375	0.0034309	0.00029451	0.00035223	0.0059179	0.025563	0.036321	0.032905	0.022601	0.03032	0.026304	0.0077993	0.00062963	3
0.040881	0.037143	0.049616	0.049834	0.040068	0.036788	0.037219	0.053217	0.046661	0.0309	0.010444	0.011697	0.035125	0.15042	0.1442	0.036478	0.013362	0.011367	0.0086938	0.0067614	0.00066009	0.0032922	0.028035	0.052115	0.041276	0.037798	0.032166	0.011484	0.0035145	0.00099194	0.0011553	0.005475	0.034702	0.045744	0.035924	0.037305	0.036038	0.013488	0.0019178	0.00026391	3
0.046489	0.057654	0.057596	0.027646	0.028824	0.032239	0.039121	0.064988	0.072008	0.07027	0.028624	0.029915	0.054922	0.075626	0.059137	0.05884	0.031059	0.030468	0.06258	0.068801	0.0033089	0.014398	0.032696	0.035947	0.051918	0.040674	0.02165	0.013133	0.027951	0.0086647	0.0022732	0.011398	0.015903	0.033059	0.037192	0.056438	0.041639	0.022147	0.016525	0.01334	3
0.034407	0.025814	0.027218	0.032663	0.04096	0.060778	0.06452	0.049652	0.044309	0.041469	0.012749	0.022657	0.029364	0.045681	0.065115	0.074588	0.068604	0.045868	0.024769	0.037201	0.0013412	0.0065855	0.017818	0.036903	0.045454	0.040518	0.033459	0.019893	0.0047724	0.0037012	0.00092195	0.0029083	0.015528	0.03123	0.031626	0.039617	0.039476	0.030598	0.01587	0.0037742	3
0.032233	0.033866	0.052912	0.069894	0.063239	0.063786	0.053225	0.048855	0.064987	0.068957	0.033141	0.048832	0.046145	0.059701	0.06834	0.094181	0.073724	0.038827	0.036372	0.05649	0.0078294	0.01291	0.022043	0.047092	0.051352	0.047608	0.050322	0.02835	0.0062902	0.0016591	0.0026153	0.011838	0.02273	0.031265	0.047997	0.049945	0.044718	0.041706	0.016982	0.0041757	3
0.032675	0.033156	0.054404	0.075077	0.062578	0.073977	0.055408	0.049069	0.063191	0.066958	0.045895	0.040964	0.056653	0.058288	0.076152	0.098446	0.05013	0.0383	0.04684	0.056667	0.0082474	0.011387	0.025335	0.050631	0.050152	0.045378	0.054679	0.026008	0.0074847	0.0017362	0.0016499	0.015699	0.024217	0.035072	0.048674	0.047031	0.045763	0.045694	0.01356	0.0047766	3
0.033105	0.033845	0.053729	0.06729	0.060046	0.05936	0.047334	0.047778	0.064618	0.063961	0.021514	0.047209	0.039174	0.059963	0.060884	0.080538	0.093501	0.04589	0.035456	0.049062	0.0045974	0.014636	0.016125	0.044072	0.052324	0.049805	0.04305	0.033938	0.0063207	0.0016376	0.0024461	0.010052	0.021682	0.030086	0.046221	0.049267	0.043737	0.039008	0.018442	0.0037587	3
0.067865	0.076403	0.10156	0.099528	0.08126	0.084962	0.098576	0.094623	0.089876	0.088153	0.025092	0.027923	0.024812	0.024281	0.038158	0.18945	0.31886	0.18795	0.035487	0.021948	0.0031673	0.007213	0.025154	0.066599	0.089628	0.072827	0.07541	0.060821	0.040594	0.0044901	0.0021712	0.0062163	0.01322	0.033916	0.094076	0.10481	0.10035	0.077095	0.011689	0.00228	3
0.080727	0.10587	0.093359	0.080277	0.087633	0.098785	0.087552	0.090106	0.082647	0.073389	0.032098	0.028289	0.024697	0.024594	0.063761	0.24483	0.29433	0.1254	0.028127	0.018537	0.0058334	0.0073052	0.030008	0.060875	0.07346	0.082945	0.066258	0.075436	0.033124	0.0039815	0.0015318	0.0082075	0.013817	0.053781	0.10338	0.10412	0.092762	0.052972	0.0076196	0.0024409	3
0.1079	0.087326	0.082176	0.092635	0.095359	0.086538	0.090401	0.077549	0.073793	0.07324	0.037294	0.027683	0.029441	0.023313	0.041771	0.1764	0.29997	0.20064	0.03803	0.016929	0.0027878	0.014583	0.026137	0.055507	0.064722	0.0743	0.077055	0.061516	0.056363	0.0036226	0.0027914	0.0071194	0.015589	0.045241	0.10973	0.10056	0.091364	0.056719	0.0067667	0.0014116	3
0.096221	0.091019	0.088058	0.076377	0.066478	0.078964	0.065659	0.062386	0.052807	0.069563	0.036063	0.027786	0.029339	0.023529	0.090273	0.26184	0.20977	0.061623	0.023196	0.017158	0.0020011	0.007784	0.034705	0.051696	0.061872	0.058502	0.056367	0.065861	0.035307	0.0020326	0.002421	0.01113	0.016483	0.067935	0.093757	0.079281	0.057777	0.038852	0.0046276	0.0016178	3
0.10524	0.082984	0.083757	0.099857	0.096746	0.090903	0.091124	0.080247	0.069878	0.078923	0.034925	0.031042	0.027125	0.025014	0.027836	0.096982	0.27327	0.24893	0.086254	0.02188	0.0030496	0.012704	0.020373	0.055415	0.062326	0.074015	0.08176	0.061498	0.058893	0.0087617	0.003324	0.0065748	0.014555	0.032797	0.10222	0.1036	0.095589	0.065808	0.012797	0.0023857	3
0.1949	0.22047	0.15586	0.19325	0.10723	0.12459	0.14375	0.11444	0.10455	0.12291	0.082961	0.15388	0.087932	0.36993	0.51752	0.13177	0.034586	0.038407	0.032399	0.040646	0.0025549	0.011547	0.087353	0.14592	0.14165	0.15643	0.13484	0.044053	0.010467	0.0085685	0.0084801	0.083553	0.12764	0.12006	0.13881	0.11587	0.09315	0.04043	0.012834	0.0025345	3
0.13628	0.1108	0.14035	0.12408	0.10086	0.11899	0.11638	0.096132	0.077669	0.089014	0.054804	0.037392	0.052009	0.32588	0.36328	0.16489	0.037319	0.033585	0.028893	0.02604	0.0024198	0.012556	0.033845	0.1057	0.13829	0.13828	0.081621	0.034972	0.010835	0.0016183	0.016121	0.015636	0.10001	0.10592	0.10383	0.080914	0.072318	0.049867	0.0095051	0.0018427	3
0.21813	0.15409	0.19239	0.10142	0.12685	0.14028	0.10944	0.10801	0.12358	0.10614	0.12639	0.089142	0.10553	0.49567	0.36975	0.05906	0.037078	0.032672	0.034076	0.033036	0.0038403	0.0086214	0.09583	0.12753	0.16002	0.12749	0.11906	0.029176	0.0095482	0.007021	0.029324	0.076621	0.095491	0.13855	0.1096	0.10895	0.07681	0.039918	0.0084958	0.0037614	3
0.1014	0.12845	0.14233	0.10815	0.10875	0.12307	0.10595	0.090801	0.074171	0.11237	0.032458	0.031683	0.036119	0.26414	0.35982	0.23515	0.058605	0.036189	0.026681	0.028007	0.0037952	0.011319	0.041041	0.084654	0.14232	0.12064	0.10378	0.026731	0.013661	0.0019472	0.0026396	0.016371	0.089082	0.10852	0.099677	0.083921	0.07188	0.067179	0.0099763	0.0014292	3
0.15866	0.10283	0.13577	0.13522	0.10076	0.11996	0.12304	0.095196	0.081907	0.07985	0.065891	0.038723	0.069283	0.37337	0.3567	0.13187	0.034075	0.031938	0.029974	0.025736	0.0025992	0.012639	0.032187	0.11975	0.13162	0.14534	0.078797	0.036892	0.0094487	0.0016953	0.022214	0.01792	0.10599	0.10447	0.10641	0.081185	0.074538	0.043896	0.0084046	0.0017739	3
0.079694	0.12498	0.12779	0.13327	0.12113	0.14936	0.12023	0.10667	0.10856	0.097308	0.036708	0.035338	0.036753	0.13058	0.3591	0.39225	0.13967	0.03298	0.027286	0.017252	0.006013	0.012976	0.020462	0.095581	0.14057	0.16703	0.10457	0.030912	0.0050308	0.0018275	0.0028668	0.015133	0.075259	0.089042	0.11461	0.10202	0.1078	0.064377	0.012339	0.0020373	3
0.12341	0.13328	0.11917	0.1556	0.10989	0.10642	0.10795	0.098497	0.11166	0.15908	0.044571	0.033475	0.036235	0.14906	0.39016	0.37522	0.14014	0.042881	0.031003	0.020959	0.006629	0.014949	0.030899	0.11858	0.11519	0.14687	0.13875	0.028527	0.013955	0.001788	0.0037724	0.021219	0.072399	0.11094	0.11014	0.10252	0.083761	0.071589	0.033683	0.0029622	3
0.12746	0.13945	0.1278	0.15245	0.10453	0.10673	0.10474	0.096684	0.1242	0.17053	0.045864	0.046534	0.033817	0.045481	0.20341	0.42283	0.32278	0.099897	0.035946	0.024463	0.0087225	0.013478	0.024774	0.098208	0.12526	0.12852	0.15378	0.057463	0.014848	0.0023	0.0053408	0.012594	0.058066	0.1131	0.10653	0.11491	0.086935	0.070238	0.059413	0.0043815	3
0.086427	0.1304	0.12577	0.13505	0.12008	0.15771	0.11124	0.10657	0.10686	0.097858	0.041017	0.03525	0.046562	0.23384	0.42713	0.28817	0.055744	0.027927	0.024147	0.018391	0.0074674	0.011348	0.031648	0.10377	0.14478	0.16704	0.092781	0.022901	0.0044026	0.0019135	0.003317	0.022701	0.086945	0.087692	0.1127	0.10941	0.091974	0.059342	0.0068763	0.0020477	3
0.13659	0.12933	0.14466	0.12709	0.15397	0.10962	0.10753	0.10773	0.099153	0.11604	0.048621	0.039178	0.0324	0.060373	0.24171	0.42254	0.3063	0.057228	0.030682	0.024066	0.0030055	0.014191	0.021196	0.082854	0.11559	0.15028	0.15671	0.057892	0.013051	0.0015745	0.0048914	0.018882	0.072951	0.090854	0.11394	0.11119	0.090984	0.075305	0.029354	0.0048212	3
0.26995	0.24614	0.26818	0.20498	0.16097	0.23127	0.16548	0.15472	0.23352	0.29802	0.077852	0.11506	0.34193	0.41862	0.45662	0.27048	0.15694	0.18649	0.12785	0.11337	0.0073845	0.057355	0.12538	0.15558	0.19812	0.24954	0.18316	0.084514	0.048346	0.012987	0.010251	0.070087	0.15915	0.1381	0.21225	0.23706	0.11329	0.068778	0.078866	0.022071	3
0.26948	0.25923	0.25618	0.18237	0.17434	0.2413	0.17231	0.1855	0.25185	0.29823	0.16502	0.059251	0.13263	0.37872	0.42721	0.44945	0.26226	0.1423	0.19498	0.10791	0.012983	0.056357	0.12247	0.15432	0.19402	0.22217	0.19702	0.12178	0.04511	0.021388	0.007678	0.043668	0.14279	0.16657	0.20409	0.26501	0.13698	0.092478	0.055296	0.034707	3
0.23933	0.26425	0.24656	0.26064	0.19326	0.16078	0.22805	0.15376	0.16588	0.24706	0.099256	0.10998	0.33289	0.41221	0.45964	0.27331	0.15469	0.12773	0.11175	0.11519	0.0095553	0.049453	0.11556	0.13505	0.22335	0.23626	0.16608	0.094083	0.047292	0.0086336	0.023044	0.056385	0.16112	0.15804	0.18041	0.26308	0.12556	0.058952	0.031483	0.026288	3
0.18384	0.26243	0.26821	0.2517	0.26479	0.20045	0.15476	0.23242	0.1796	0.16877	0.177	0.073442	0.15294	0.40004	0.38441	0.43356	0.23356	0.10646	0.11164	0.10176	0.029965	0.028241	0.095786	0.11074	0.25962	0.2227	0.17075	0.10416	0.040987	0.011098	0.020822	0.051618	0.11362	0.20213	0.18625	0.19893	0.23398	0.055273	0.018653	0.0052828	3
0.18974	0.20165	0.24961	0.26138	0.25003	0.25429	0.1868	0.17319	0.24455	0.17167	0.12167	0.14089	0.070091	0.21177	0.41289	0.44441	0.3872	0.19778	0.11203	0.12133	0.023559	0.027879	0.078685	0.11003	0.26939	0.21939	0.1826	0.12557	0.03695	0.01626	0.0085923	0.043822	0.091602	0.15805	0.23683	0.16881	0.19194	0.16581	0.017502	0.0051505	3
0.035901	0.039419	0.023847	0.029746	0.034613	0.030469	0.028087	0.034944	0.032431	0.036693	0.0077815	0.007929	0.0096133	0.019227	0.054148	0.10687	0.084954	0.029575	0.010884	0.0089445	0.00099197	0.0031574	0.016914	0.023805	0.023368	0.029998	0.028827	0.027871	0.0075846	0.001238	0.00098802	0.0025924	0.010272	0.028002	0.022858	0.032731	0.045431	0.017475	0.0028288	0.00093748	3
0.020511	0.033511	0.034184	0.027869	0.03435	0.03396	0.033769	0.035902	0.035205	0.037289	0.0076574	0.0092855	0.008185	0.026711	0.076447	0.098897	0.057927	0.031929	0.011948	0.01106	0.001119	0.0030196	0.020687	0.029491	0.02584	0.025856	0.025159	0.023263	0.0067798	0.0013656	0.00040383	0.0024004	0.0053096	0.018126	0.035755	0.047596	0.032029	0.016209	0.0039758	0.0016027	3
0.042308	0.035828	0.033967	0.034625	0.034198	0.021693	0.033577	0.033856	0.028751	0.033815	0.0080529	0.0071559	0.010482	0.029027	0.11008	0.11422	0.036361	0.011943	0.010678	0.0089905	0.0007466	0.0030977	0.015907	0.02523	0.027337	0.035777	0.034405	0.018928	0.0040295	0.00096009	0.00079411	0.0027956	0.01774	0.034304	0.031889	0.024831	0.033718	0.016461	0.0034606	0.00080056	3
0.034114	0.033174	0.033838	0.0335	0.023087	0.034729	0.03467	0.028339	0.035696	0.0337	0.0076849	0.0079523	0.0083955	0.0097617	0.032552	0.10831	0.10047	0.039962	0.011687	0.0094279	0.00079718	0.0020063	0.012141	0.023597	0.02647	0.028996	0.034501	0.024679	0.0075737	0.0011231	0.0011548	0.00225	0.0070297	0.027616	0.030585	0.025083	0.035325	0.028315	0.0044711	0.00076372	3
0.0376	0.033296	0.033016	0.038687	0.021347	0.030876	0.034451	0.029627	0.029798	0.034724	0.0073512	0.0081998	0.0095916	0.015129	0.09489	0.10024	0.064689	0.012961	0.0098691	0.0096716	0.00027004	0.0025029	0.01618	0.020538	0.031961	0.034462	0.029017	0.022269	0.0046869	0.0013074	0.0013042	0.0027644	0.013181	0.030545	0.029817	0.024318	0.036125	0.018458	0.0036	0.0010604	3
0.042479	0.049417	0.050635	0.068828	0.070493	0.052697	0.036244	0.02664	0.024758	0.023802	0.021004	0.014689	0.013886	0.019497	0.058481	0.16021	0.099525	0.036608	0.020584	0.015734	0.0015184	0.0024051	0.0058261	0.015475	0.036982	0.067938	0.060246	0.025295	0.00379	0.0010781	0.0030974	0.0069971	0.019549	0.036571	0.049817	0.045847	0.028244	0.015093	0.013291	0.0024253	3
0.048474	0.061513	0.066965	0.068459	0.049787	0.028998	0.030934	0.025903	0.023817	0.036325	0.012326	0.014988	0.017002	0.053954	0.15748	0.083252	0.046354	0.025776	0.01981	0.016856	0.0011385	0.0036816	0.009488	0.022263	0.033987	0.065187	0.063013	0.016929	0.0043664	0.0013812	0.0013066	0.0057844	0.037399	0.048243	0.047683	0.02555	0.021105	0.022859	0.009643	0.0018975	3
0.047307	0.038758	0.042002	0.068622	0.098829	0.064575	0.038913	0.036326	0.042257	0.044814	0.026986	0.061876	0.036236	0.077713	0.13673	0.11744	0.037008	0.013375	0.010298	0.014677	0.0011417	0.0070034	0.040959	0.060883	0.037894	0.042494	0.030105	0.031346	0.0056088	0.0019507	0.0017917	0.0051753	0.032972	0.053727	0.071431	0.047798	0.034829	0.011176	0.0033858	0.0012952	3
0.038343	0.055812	0.050954	0.047991	0.02989	0.031663	0.045959	0.041052	0.054156	0.046734	0.021444	0.034254	0.020026	0.022541	0.030338	0.059984	0.15613	0.065907	0.021252	0.017874	0.0021646	0.0030425	0.0085091	0.029118	0.055776	0.053729	0.032871	0.026404	0.0080356	0.0028425	0.0032484	0.011866	0.018424	0.035709	0.027021	0.033605	0.031684	0.034792	0.024131	0.001616	3
0.10408	0.076037	0.047271	0.039426	0.053941	0.046935	0.062679	0.073153	0.062271	0.043328	0.031951	0.022042	0.06391	0.037689	0.11039	0.23996	0.077277	0.026482	0.0090716	0.012788	0.00082199	0.0049769	0.014013	0.056064	0.075209	0.061321	0.050841	0.036103	0.0074904	0.00097934	0.0035807	0.032601	0.025386	0.056141	0.048535	0.048238	0.047088	0.036449	0.0087057	0.0020517	3
0.084593	0.073209	0.076983	0.071546	0.096405	0.12617	0.10878	0.077435	0.076261	0.075738	0.053456	0.037346	0.031034	0.19095	0.26578	0.13959	0.066592	0.034324	0.02363	0.016049	0.0040136	0.017691	0.049007	0.061146	0.11028	0.099612	0.05145	0.027269	0.0089888	0.0039711	0.011894	0.0090058	0.035422	0.083982	0.084648	0.086093	0.090749	0.020283	0.0057179	0.0018548	3
0.070753	0.098516	0.12507	0.10274	0.068951	0.065206	0.076632	0.078696	0.072288	0.075852	0.028242	0.22008	0.31901	0.10101	0.053974	0.027632	0.023904	0.016496	0.020824	0.018033	0.0033024	0.050989	0.071323	0.052914	0.078099	0.11025	0.032951	0.010282	0.0047462	0.0024948	0.0069332	0.056707	0.066943	0.098675	0.074072	0.074217	0.022421	0.012278	0.0047118	0.0018206	3
0.11978	0.10793	0.11955	0.10837	0.05966	0.059282	0.041894	0.043992	0.029847	0.04617	0.038164	0.037789	0.074805	0.15434	0.1884	0.10645	0.037556	0.045436	0.034286	0.03067	0.002058	0.0055906	0.020913	0.040562	0.08942	0.076292	0.068535	0.033435	0.03143	0.0042447	0.0062648	0.019702	0.062495	0.11998	0.05737	0.040862	0.037436	0.020057	0.0079426	0.0020603	3
0.031293	0.049184	0.052184	0.087269	0.068768	0.070863	0.057662	0.070198	0.078903	0.075914	0.046737	0.022121	0.024288	0.049491	0.15528	0.18853	0.095774	0.036504	0.021883	0.016798	0.0068268	0.017066	0.037202	0.044851	0.070752	0.060678	0.045439	0.029514	0.0076165	0.0014504	0.0038268	0.0086891	0.010818	0.028217	0.086185	0.076409	0.060197	0.034156	0.0079027	0.002095	3
0.10145	0.057591	0.055849	0.042548	0.037297	0.033221	0.043414	0.068695	0.084893	0.071742	0.029902	0.05005	0.10839	0.18299	0.11638	0.039215	0.020439	0.016821	0.020193	0.019931	0.0012249	0.023674	0.053994	0.043694	0.041372	0.078019	0.038461	0.0085083	0.0074188	0.0041786	0.0060239	0.044692	0.036177	0.032429	0.037448	0.057209	0.067025	0.011287	0.0049666	0.0027521	3
0.10004	0.12257	0.10026	0.070073	0.075549	0.080476	0.079492	0.070138	0.071623	0.056526	0.034864	0.028136	0.22374	0.3006	0.094331	0.05124	0.025923	0.023424	0.018371	0.020581	0.002131	0.020127	0.064474	0.079852	0.058573	0.074873	0.086265	0.023253	0.0052857	0.0018759	0.0037163	0.038728	0.069176	0.097138	0.074298	0.076485	0.038908	0.012912	0.0050901	0.0012034	3
0.025746	0.041595	0.048019	0.090447	0.073772	0.073174	0.055376	0.065576	0.063128	0.07282	0.029987	0.096956	0.19535	0.14234	0.049497	0.025847	0.016845	0.016967	0.017472	0.020332	0.010797	0.035316	0.044157	0.06666	0.065262	0.038451	0.026109	0.012405	0.0048481	0.0016502	0.0022284	0.0099773	0.034152	0.080644	0.070941	0.064704	0.029212	0.010578	0.0049312	0.0019755	3
0.067192	0.083382	0.11045	0.10928	0.088915	0.064686	0.072845	0.083973	0.068382	0.075512	0.024565	0.16055	0.3416	0.1366	0.051012	0.033965	0.023262	0.017391	0.018248	0.019559	0.0018378	0.047358	0.070834	0.05424	0.07981	0.10703	0.035127	0.009625	0.0045203	0.0018732	0.0043434	0.049897	0.062075	0.090064	0.087568	0.073063	0.029451	0.010935	0.0066788	0.0017601	3
0.080454	0.071838	0.069792	0.057727	0.081834	0.055304	0.081329	0.087824	0.062657	0.052567	0.028697	0.019964	0.087854	0.20326	0.059705	0.055536	0.082246	0.1078	0.044792	0.02307	0.0076147	0.0050403	0.0087648	0.019484	0.13802	0.10389	0.051681	0.0083538	0.0053602	0.0038863	0.0019859	0.024044	0.06537	0.053897	0.049301	0.031687	0.04208	0.052383	0.029257	0.0041338	3
0.03155	0.045125	0.066029	0.083003	0.070047	0.067771	0.055249	0.071937	0.06719	0.075853	0.022681	0.023974	0.048013	0.14751	0.19658	0.10876	0.040564	0.023381	0.015887	0.01531	0.0026802	0.023968	0.042967	0.046061	0.070261	0.064183	0.037384	0.021759	0.0067901	0.0015162	0.0013965	0.0066675	0.015526	0.058696	0.086972	0.060102	0.063862	0.016515	0.0056931	0.0010838	3
0.059483	0.065735	0.04971	0.056832	0.074838	0.089144	0.07961	0.062298	0.058937	0.068782	0.037745	0.030917	0.027318	0.057783	0.19612	0.18804	0.062904	0.026086	0.023541	0.025126	0.0056881	0.016654	0.027901	0.044719	0.080262	0.063263	0.05156	0.030833	0.0079644	0.0034477	0.0037147	0.0072806	0.03048	0.045865	0.063943	0.086739	0.052939	0.029957	0.0081589	0.0017337	3
0.054946	0.066905	0.084112	0.083	0.074994	0.069605	0.067149	0.080355	0.07507	0.059592	0.033381	0.043129	0.034065	0.045665	0.091052	0.1858	0.17648	0.058248	0.025165	0.035487	0.002067	0.013475	0.040589	0.046532	0.050117	0.066914	0.078822	0.044296	0.014665	0.0026936	0.0030884	0.0082134	0.018467	0.049912	0.08904	0.075269	0.068798	0.027225	0.015221	0.0050961	3
0.090146	0.076369	0.058898	0.0583	0.062842	0.082951	0.060073	0.052501	0.046671	0.081768	0.060357	0.092575	0.10612	0.15122	0.11068	0.039991	0.023757	0.036646	0.020189	0.028576	0.022982	0.02842	0.034076	0.045261	0.045327	0.058059	0.073939	0.018456	0.0069858	0.004235	0.00068348	0.020207	0.062961	0.063738	0.077637	0.061041	0.027563	0.0089737	0.006437	0.0050309	3
0.064783	0.057278	0.048483	0.047414	0.066978	0.055724	0.063298	0.054791	0.053949	0.067631	0.024591	0.023891	0.042968	0.049815	0.055509	0.080106	0.16714	0.085622	0.031892	0.029017	0.0030235	0.0073173	0.011926	0.045006	0.065756	0.054953	0.043621	0.046276	0.012035	0.0026301	0.0029633	0.0081224	0.024946	0.049878	0.044284	0.039395	0.056307	0.040158	0.022734	0.0037674	3
0.057177	0.064988	0.052717	0.057155	0.07183	0.088721	0.087203	0.07112	0.068578	0.06321	0.025494	0.034012	0.0375	0.028118	0.027426	0.056612	0.19787	0.19029	0.057707	0.023256	0.00091755	0.014338	0.022317	0.032267	0.054482	0.0806	0.057862	0.047979	0.025249	0.0021561	0.0015715	0.00777	0.013799	0.038926	0.055261	0.061368	0.082263	0.050763	0.024433	0.0026207	3
0.099135	0.079357	0.061505	0.063717	0.064624	0.063004	0.052376	0.052651	0.049111	0.077334	0.029147	0.016395	0.022651	0.031051	0.045127	0.056571	0.089226	0.091033	0.14513	0.13784	0.0014573	0.0048859	0.011864	0.046889	0.045626	0.054359	0.046947	0.036964	0.048727	0.037291	0.0072854	0.0091501	0.012748	0.016883	0.053733	0.070269	0.066906	0.066751	0.029608	0.0019354	3
0.064646	0.067206	0.069071	0.074394	0.058856	0.058524	0.047933	0.076945	0.087952	0.062005	0.020453	0.033779	0.058886	0.13514	0.10941	0.09053	0.10327	0.055806	0.034532	0.035498	0.0012178	0.010723	0.058138	0.048342	0.048916	0.053116	0.043547	0.043215	0.022489	0.003175	0.004167	0.010845	0.021981	0.046013	0.075151	0.078145	0.065032	0.01762	0.0094134	0.005157	3
0.047207	0.060317	0.080824	0.090569	0.0786	0.064865	0.062749	0.067925	0.060422	0.053666	0.016714	0.022427	0.032364	0.040944	0.034736	0.034792	0.056184	0.15565	0.19292	0.077209	0.0013492	0.0055498	0.013497	0.039139	0.05078	0.047256	0.05179	0.072499	0.042785	0.010299	0.0015124	0.0067446	0.013535	0.021443	0.043483	0.082051	0.069582	0.061199	0.030769	0.0034352	3
0.046831	0.059521	0.089745	0.058283	0.071066	0.1028	0.099552	0.099782	0.08676	0.053782	0.018506	0.04097	0.037892	0.044562	0.20518	0.22321	0.086482	0.045015	0.040775	0.040312	0.002305	0.025287	0.021045	0.05841	0.085153	0.06925	0.075273	0.031537	0.011739	0.0042249	0.0014305	0.0055071	0.014819	0.060123	0.075371	0.1128	0.059212	0.040841	0.01186	0.0022578	3
0.082065	0.060987	0.064562	0.06436	0.064334	0.04995	0.0515	0.045387	0.068989	0.081112	0.019996	0.016626	0.022179	0.027306	0.04693	0.073897	0.10979	0.095636	0.11767	0.10481	0.0016176	0.0051843	0.010358	0.056914	0.042144	0.052199	0.045495	0.034605	0.039294	0.029799	0.0030157	0.0077096	0.015131	0.016561	0.049249	0.065025	0.070537	0.067987	0.020224	0.0026181	3
0.07066	0.079089	0.077831	0.055313	0.074605	0.11424	0.13034	0.10916	0.095935	0.11577	0.043228	0.07135	0.19693	0.17018	0.11312	0.075283	0.095669	0.045091	0.046344	0.068617	0.0020673	0.028403	0.070224	0.094975	0.10022	0.072035	0.041049	0.032012	0.01287	0.0077776	0.0070617	0.02202	0.037899	0.067031	0.095878	0.0952	0.0627	0.050089	0.011071	0.014237	3
0.152	0.16194	0.14404	0.08327	0.12507	0.14807	0.10812	0.091813	0.10069	0.13824	0.12584	0.099152	0.11156	0.28296	0.24796	0.087755	0.065489	0.071944	0.081454	0.074227	0.0037472	0.03156	0.089913	0.08793	0.11744	0.1078	0.10463	0.054879	0.024619	0.0032173	0.0083599	0.046383	0.13379	0.089365	0.082009	0.10014	0.074045	0.047345	0.031641	0.010773	3
0.10268	0.080977	0.060864	0.088351	0.11859	0.12123	0.10649	0.091035	0.087163	0.090959	0.06676	0.043351	0.039348	0.081707	0.2131	0.1741	0.13268	0.076984	0.094381	0.039953	0.0054633	0.010534	0.035018	0.092277	0.079177	0.11878	0.072508	0.030384	0.023992	0.010225	0.011045	0.013784	0.038881	0.055047	0.10053	0.083189	0.081674	0.067764	0.019073	0.0035711	3
0.10048	0.14983	0.16479	0.13996	0.080378	0.1212	0.1477	0.10676	0.089817	0.098108	0.13568	0.095682	0.099135	0.28065	0.24505	0.087182	0.060448	0.051701	0.063737	0.067475	0.0025749	0.034679	0.088383	0.074751	0.10654	0.12119	0.099697	0.046539	0.011904	0.001504	0.01014	0.028318	0.11421	0.12265	0.088335	0.087866	0.069516	0.040764	0.022319	0.0076922	3
0.10875	0.15064	0.15842	0.15007	0.084019	0.11694	0.15037	0.1055	0.084863	0.09515	0.14332	0.10369	0.079091	0.21413	0.30141	0.11255	0.058683	0.055976	0.059859	0.060796	0.0021022	0.034144	0.090798	0.074004	0.10869	0.11613	0.10423	0.055094	0.012023	0.002092	0.015646	0.027098	0.096098	0.14117	0.089839	0.080544	0.079778	0.040468	0.021286	0.0045775	3
0.076697	0.069828	0.099711	0.062418	0.042976	0.065442	0.074317	0.070906	0.088309	0.09772	0.044906	0.051033	0.059452	0.11742	0.14928	0.10942	0.074692	0.062089	0.034361	0.05008	0.0065902	0.019867	0.03916	0.06669	0.064972	0.064375	0.038065	0.059522	0.011297	0.0026791	0.0027634	0.01153	0.048376	0.071406	0.05277	0.057275	0.061184	0.041508	0.024966	0.0034874	3
0.10165	0.095004	0.098614	0.089071	0.084687	0.072586	0.077564	0.1014	0.049404	0.046973	0.045668	0.049467	0.069106	0.12778	0.14394	0.14027	0.098279	0.05488	0.049119	0.047961	0.0059449	0.015641	0.041174	0.039499	0.074934	0.083479	0.0668	0.049667	0.026037	0.0054021	0.0043616	0.015875	0.045007	0.06672	0.099693	0.091541	0.044313	0.021531	0.011249	0.0051948	3
0.068071	0.097115	0.074045	0.037637	0.059039	0.073396	0.068913	0.086221	0.099568	0.07567	0.042201	0.051181	0.054588	0.11999	0.13872	0.10588	0.072083	0.066308	0.046134	0.047691	0.0038593	0.016897	0.03951	0.05647	0.081519	0.062712	0.048932	0.039113	0.018836	0.0019527	0.0046079	0.014551	0.046033	0.058692	0.053797	0.06174	0.05881	0.046372	0.016621	0.0077181	3
0.083424	0.073328	0.099918	0.080769	0.044317	0.063765	0.082218	0.074396	0.081166	0.093427	0.045425	0.084444	0.13038	0.14571	0.090221	0.068168	0.058462	0.035161	0.064572	0.062577	0.0074352	0.0263	0.049048	0.065824	0.066165	0.047185	0.082418	0.027861	0.015762	0.0048781	0.001842	0.027525	0.070107	0.051337	0.053263	0.068676	0.049585	0.04679	0.019145	0.0027427	3
0.097722	0.074191	0.086357	0.082811	0.11344	0.09246	0.089628	0.092425	0.08054	0.086593	0.052702	0.063893	0.12141	0.13607	0.13472	0.092628	0.10671	0.065061	0.068526	0.055705	0.0022482	0.032882	0.059157	0.065923	0.086344	0.064264	0.05039	0.04073	0.029295	0.017218	0.0097029	0.013917	0.027261	0.055335	0.12951	0.097358	0.075483	0.026141	0.010908	0.0032467	3
0.064496	0.049163	0.053852	0.068097	0.03113	0.031265	0.02616	0.057032	0.029226	0.033284	0.030716	0.02781	0.022804	0.072354	0.1538	0.060632	0.021892	0.017803	0.016067	0.030389	0.0023321	0.0072761	0.017785	0.039505	0.036013	0.049073	0.033115	0.030108	0.0086872	0.0025733	0.0031189	0.011153	0.042149	0.040921	0.037331	0.030249	0.040352	0.011976	0.0046009	0.0026763	3
0.033346	0.034796	0.03138	0.063954	0.031904	0.029655	0.043604	0.045179	0.025666	0.031471	0.033066	0.024366	0.018024	0.02671	0.093077	0.11347	0.022668	0.015821	0.01629	0.015692	0.0027699	0.0054948	0.017322	0.03253	0.034959	0.03418	0.037004	0.015113	0.0036326	0.0020739	0.0028075	0.012323	0.016081	0.024286	0.042093	0.03546	0.033953	0.010545	0.0057633	0.0013639	3
0.063518	0.043088	0.029376	0.059335	0.07104	0.087413	0.050123	0.0533	0.059288	0.052501	0.028984	0.027937	0.024875	0.061673	0.22253	0.10169	0.04018	0.017623	0.017302	0.028672	0.003754	0.0086361	0.029131	0.043825	0.060224	0.067494	0.033169	0.029409	0.0056192	0.0015643	0.0016179	0.0063324	0.036084	0.041568	0.05777	0.062567	0.040886	0.021593	0.0056835	0.0069893	3
0.057093	0.059099	0.030405	0.031934	0.032481	0.065884	0.032863	0.028366	0.044889	0.047435	0.029097	0.03179	0.02254	0.020117	0.022199	0.12187	0.1259	0.029136	0.016957	0.017219	0.0033581	0.0046282	0.014456	0.039163	0.028189	0.046435	0.029502	0.035287	0.0086309	0.0023306	0.0032469	0.0083206	0.022774	0.037427	0.03483	0.033926	0.030774	0.034989	0.0066221	0.0020061	3
0.030039	0.044412	0.044772	0.027226	0.033422	0.053941	0.027861	0.028855	0.026004	0.023831	0.02267	0.021267	0.022916	0.049552	0.11203	0.046889	0.015976	0.01688	0.014403	0.018584	0.0013853	0.0095461	0.014535	0.020569	0.037781	0.025235	0.037151	0.016689	0.0036925	0.0014881	0.0041973	0.0057851	0.015858	0.035617	0.034313	0.038901	0.016879	0.01188	0.0034542	0.0015003	3
0.032468	0.032361	0.02162	0.053093	0.049919	0.051603	0.067782	0.059385	0.031828	0.033525	0.018304	0.018225	0.019344	0.04925	0.21049	0.057501	0.018844	0.017202	0.013533	0.017177	0.0015279	0.0053924	0.016336	0.050071	0.062349	0.041441	0.01942	0.012975	0.0058042	0.0026234	0.0029807	0.006888	0.013826	0.025949	0.051026	0.061066	0.031949	0.015174	0.0056883	0.0017346	3
0.036761	0.072343	0.066645	0.049579	0.027939	0.040187	0.043626	0.030395	0.035634	0.061268	0.018212	0.013773	0.015223	0.028223	0.078498	0.20084	0.074629	0.025419	0.02126	0.012336	0.0010816	0.0044302	0.031859	0.023551	0.033814	0.032144	0.060646	0.036698	0.0050338	0.001409	0.0018538	0.0053785	0.016104	0.049248	0.049503	0.031773	0.042381	0.030879	0.0053196	0.001035	3
0.049388	0.071357	0.061618	0.032411	0.030704	0.040444	0.038824	0.028227	0.054437	0.047788	0.013887	0.016728	0.015712	0.013625	0.020811	0.038108	0.10255	0.17577	0.038414	0.022384	0.0019841	0.0046354	0.0077493	0.035184	0.02869	0.031255	0.029239	0.054262	0.033776	0.001634	0.0011634	0.0057895	0.0055879	0.021347	0.060298	0.038923	0.032227	0.051569	0.0093409	0.0016992	3
0.041832	0.038786	0.038337	0.044877	0.02666	0.040414	0.029252	0.040489	0.026734	0.050214	0.028606	0.023452	0.021454	0.022863	0.015039	0.087679	0.1075	0.041101	0.019905	0.017987	0.0098236	0.006915	0.0090692	0.018048	0.03476	0.030112	0.039355	0.032935	0.0060325	0.0014744	0.001814	0.0054953	0.012052	0.031812	0.038811	0.038342	0.021494	0.029399	0.0092137	0.0018581	3
0.036285	0.047263	0.028248	0.040561	0.031452	0.040685	0.028434	0.036714	0.031323	0.019558	0.022282	0.020196	0.02069	0.015114	0.067727	0.10497	0.037058	0.022138	0.016726	0.019002	0.00092319	0.0096403	0.0095992	0.021272	0.025757	0.040012	0.033261	0.021037	0.0062668	0.0018	0.0015267	0.0063773	0.015554	0.036656	0.029354	0.035173	0.024996	0.01255	0.005663	0.0024349	3
0.037624	0.044232	0.063472	0.043491	0.033509	0.029131	0.035982	0.022556	0.038143	0.040219	0.01774	0.014249	0.032475	0.023322	0.042939	0.1149	0.055557	0.034415	0.032552	0.030557	0.0015772	0.0047236	0.013156	0.028532	0.032412	0.039155	0.029607	0.021435	0.01791	0.005175	0.0014496	0.0056423	0.01812	0.033489	0.033715	0.036577	0.028826	0.029088	0.0067651	0.0017115	3
0.033188	0.04292	0.036836	0.041291	0.040206	0.03877	0.058412	0.058744	0.037893	0.027895	0.013512	0.022122	0.034843	0.024881	0.068723	0.061664	0.067684	0.04248	0.04142	0.038844	0.001359	0.0044226	0.02123	0.034331	0.032603	0.032036	0.031922	0.034777	0.012239	0.0035212	0.0015206	0.0060071	0.0091908	0.024167	0.042558	0.047309	0.038965	0.027925	0.0074623	0.0025502	3
0.041757	0.038045	0.041528	0.041991	0.044808	0.063256	0.051974	0.034567	0.025733	0.033152	0.011061	0.03178	0.024786	0.03491	0.081723	0.065301	0.054952	0.040057	0.040444	0.032206	0.00067792	0.0029995	0.023114	0.033947	0.034889	0.028541	0.031968	0.033344	0.014476	0.0029402	0.0019078	0.0047477	0.012733	0.03445	0.045216	0.043132	0.03504	0.020567	0.0072658	0.0021793	3
0.039911	0.04678	0.061266	0.04376	0.032809	0.028661	0.036907	0.023538	0.038998	0.041128	0.011316	0.031181	0.023718	0.03399	0.10859	0.061402	0.033819	0.029843	0.03267	0.029715	0.0016335	0.0048761	0.020899	0.022193	0.040391	0.039459	0.026922	0.021053	0.015205	0.0057213	0.0011496	0.0061206	0.023453	0.034331	0.032836	0.040203	0.030068	0.021029	0.0051936	0.0029431	3
0.030212	0.033177	0.02923	0.041007	0.035532	0.036149	0.036419	0.035795	0.049509	0.05725	0.016603	0.015558	0.03565	0.031121	0.040745	0.051702	0.05949	0.05777	0.040634	0.039206	0.0014529	0.01088	0.016528	0.026048	0.029433	0.037874	0.038572	0.017156	0.010668	0.0036713	0.0024689	0.00413	0.017057	0.013216	0.028772	0.035817	0.039711	0.029982	0.01682	0.0045781	3
0.039112	0.019337	0.023689	0.030334	0.022368	0.027255	0.016938	0.018135	0.017054	0.015076	0.011267	0.013147	0.016455	0.026057	0.051844	0.041641	0.020596	0.018246	0.019001	0.015495	0.00079587	0.002938	0.0082651	0.011188	0.022061	0.026969	0.015596	0.019718	0.0046173	0.0022143	0.0023337	0.0043025	0.014027	0.023476	0.024108	0.018496	0.012861	0.009156	0.0052387	0.0020366	3
0.055064	0.046419	0.021811	0.017539	0.027043	0.021972	0.02857	0.020473	0.015806	0.02108	0.018242	0.028428	0.057184	0.083643	0.01885	0.016695	0.016581	0.017091	0.012588	0.0079352	0.0030946	0.0059578	0.013771	0.024044	0.017812	0.023958	0.037751	0.0055105	0.0057859	0.00081783	0.0011577	0.015261	0.036773	0.022339	0.025708	0.014518	0.010701	0.0070901	0.0030566	0.0020942	3
0.015576	0.019341	0.019115	0.014189	0.020676	0.025851	0.027856	0.03054	0.024325	0.019222	0.0157	0.046839	0.046781	0.01585	0.014485	0.019529	0.020657	0.01457	0.01212	0.010111	0.0014207	0.013898	0.022096	0.016002	0.01339	0.014935	0.01367	0.0071441	0.0050433	0.0011411	0.0017648	0.0061043	0.008203	0.016275	0.030233	0.02509	0.0099441	0.0068336	0.003321	0.00076801	3
0.018612	0.015052	0.020829	0.023305	0.026568	0.029295	0.023455	0.02128	0.022111	0.026438	0.017285	0.07264	0.028766	0.012036	0.014388	0.021068	0.022239	0.016576	0.010343	0.012155	0.003328	0.011145	0.017421	0.024284	0.017538	0.012232	0.012311	0.008977	0.0037848	0.0024283	0.0019771	0.0040454	0.013933	0.026295	0.022584	0.020078	0.010875	0.0080946	0.0040195	0.0011856	3
0.047148	0.019737	0.018589	0.029118	0.023636	0.030839	0.019139	0.018251	0.019183	0.015644	0.011928	0.014205	0.019912	0.048825	0.047438	0.036307	0.015256	0.019444	0.015794	0.014556	0.0014339	0.0040568	0.0086681	0.014433	0.025978	0.023165	0.016076	0.021096	0.0031086	0.0032517	0.001909	0.0043903	0.020154	0.023538	0.026997	0.017009	0.011752	0.0088564	0.0050195	0.0016039	3
0.039286	0.047445	0.055583	0.05563	0.0554	0.046247	0.046888	0.051253	0.064123	0.051259	0.014614	0.013521	0.015408	0.023593	0.089671	0.1251	0.089592	0.10627	0.037214	0.017677	0.0015806	0.0040513	0.0077633	0.020037	0.061756	0.076073	0.062775	0.017131	0.0038619	0.0013209	0.0015428	0.0053811	0.020039	0.040939	0.047718	0.035638	0.028516	0.038932	0.034407	0.0039848	3
0.069491	0.053127	0.047617	0.043165	0.042153	0.067302	0.079467	0.068461	0.070376	0.070078	0.027778	0.021951	0.030031	0.063917	0.13263	0.095236	0.099831	0.057951	0.04744	0.046227	0.0039667	0.010859	0.029184	0.053694	0.059	0.035834	0.039677	0.050736	0.018856	0.0030193	0.0013627	0.0088002	0.013773	0.041105	0.068896	0.055857	0.053394	0.035893	0.022108	0.0042731	3
0.036168	0.039944	0.04773	0.056462	0.058663	0.05899	0.047482	0.047216	0.048892	0.068199	0.014523	0.015336	0.019317	0.041532	0.10821	0.12152	0.086187	0.074044	0.024834	0.01832	0.00077315	0.0049973	0.0063408	0.027741	0.077812	0.074045	0.049246	0.0070978	0.0037511	0.001638	0.001528	0.010337	0.020657	0.031326	0.046295	0.047031	0.02617	0.033111	0.031761	0.0054813	3
0.034997	0.040041	0.040381	0.054891	0.053881	0.058492	0.050612	0.047686	0.039649	0.068364	0.015918	0.019655	0.034254	0.065383	0.12109	0.090395	0.073447	0.039518	0.016182	0.018181	0.0011959	0.0044257	0.008633	0.044933	0.074451	0.073187	0.026434	0.0062804	0.0045187	0.0012025	0.0027795	0.014744	0.021192	0.03169	0.044713	0.043691	0.027284	0.031985	0.022862	0.0038821	3
0.046185	0.05532	0.056284	0.054458	0.044334	0.044158	0.04767	0.064703	0.04985	0.046776	0.012978	0.018686	0.017579	0.016718	0.05011	0.11866	0.093085	0.10961	0.062129	0.018575	0.0019576	0.0081365	0.0072182	0.014211	0.044825	0.068325	0.069607	0.034992	0.0043027	0.0010597	0.001409	0.0034107	0.019378	0.041426	0.04834	0.03192	0.032685	0.040332	0.03198	0.0031356	3
0.12053	0.10996	0.12449	0.12441	0.1252	0.13235	0.13163	0.14492	0.17708	0.19238	0.10112	0.088954	0.1182	0.1953	0.23995	0.1769	0.13351	0.11395	0.10527	0.12147	0.016347	0.034079	0.068531	0.11194	0.15948	0.12137	0.089883	0.056812	0.030828	0.006866	0.0072536	0.039954	0.058707	0.092463	0.11552	0.12461	0.10877	0.075414	0.058777	0.015812	3
0.1304	0.10604	0.12227	0.11955	0.13003	0.13958	0.13414	0.12884	0.16189	0.17475	0.08068	0.09883	0.17428	0.24148	0.19644	0.1418	0.10989	0.096821	0.1143	0.10411	0.0068581	0.028527	0.079831	0.13808	0.12542	0.1164	0.083186	0.061915	0.02834	0.0052811	0.010575	0.048685	0.060669	0.088066	0.11108	0.1112	0.1125	0.072381	0.047593	0.013445	3
0.094587	0.13521	0.13147	0.10755	0.071027	0.076881	0.078328	0.11781	0.1213	0.11999	0.073021	0.079789	0.086767	0.078002	0.15969	0.14587	0.15285	0.11336	0.090852	0.079863	0.0092659	0.021444	0.048451	0.080078	0.10167	0.089172	0.066149	0.062048	0.039076	0.010615	0.0067571	0.026712	0.051475	0.064746	0.092911	0.10438	0.085485	0.055517	0.028496	0.011865	3
0.076773	0.077026	0.069796	0.10902	0.11933	0.09988	0.11542	0.11277	0.11619	0.13111	0.076927	0.066813	0.063173	0.072944	0.10104	0.19619	0.18423	0.12082	0.075388	0.074813	0.01207	0.018771	0.037413	0.086398	0.10999	0.09804	0.07256	0.053504	0.018491	0.0070279	0.010643	0.017247	0.023093	0.058661	0.10653	0.08947	0.089512	0.072934	0.037441	0.0094108	3
0.073841	0.095057	0.12287	0.10652	0.12499	0.12065	0.12771	0.13539	0.12899	0.13585	0.068778	0.077497	0.11721	0.20394	0.19756	0.15414	0.091364	0.068878	0.089743	0.10443	0.0091777	0.024503	0.074177	0.10702	0.10777	0.099907	0.088958	0.0507	0.015206	0.0075139	0.0039723	0.019424	0.06902	0.076066	0.10341	0.10691	0.097315	0.070209	0.029663	0.013055	3
0.013605	0.016104	0.012514	0.0096405	0.012462	0.016035	0.012901	0.014948	0.012079	0.012945	0.011417	0.01089	0.016353	0.019112	0.01744	0.015365	0.014495	0.0078995	0.010443	0.010462	0.00089257	0.0040781	0.0066959	0.011468	0.012152	0.010997	0.0080165	0.0075223	0.0036287	0.00090249	0.0010644	0.0039695	0.0064835	0.010884	0.013789	0.011334	0.0091287	0.0053945	0.0033412	0.0013239	3
0.018328	0.02096	0.020792	0.020516	0.019517	0.02156	0.019808	0.017976	0.014585	0.016068	0.011827	0.016006	0.027672	0.029917	0.022422	0.015161	0.016694	0.016079	0.017265	0.016722	0.0010966	0.0031329	0.010639	0.015558	0.016003	0.017437	0.01299	0.0093334	0.0065581	0.0017346	0.0016736	0.0061511	0.0097495	0.013027	0.018403	0.018099	0.01416	0.0076492	0.0041076	0.0013662	3
0.017305	0.016117	0.016461	0.016603	0.017931	0.015955	0.014904	0.014097	0.014369	0.013925	0.012767	0.01289	0.020512	0.024706	0.021393	0.017946	0.012784	0.010973	0.012518	0.010537	0.0013773	0.0040663	0.0069889	0.011319	0.016893	0.015754	0.011316	0.0061821	0.0037914	0.0013434	0.0010954	0.0067265	0.0083926	0.011579	0.015119	0.013628	0.010877	0.0072036	0.003449	0.00078238	3
0.01595	0.016729	0.015847	0.014716	0.014817	0.014808	0.016551	0.014768	0.014363	0.015699	0.011834	0.01271	0.011262	0.013605	0.021077	0.02339	0.024306	0.012761	0.011863	0.01168	0.00089912	0.00375	0.0069312	0.0095839	0.014663	0.0147	0.013796	0.00876	0.003274	0.0012816	0.0011281	0.0034509	0.008173	0.012699	0.013713	0.012778	0.0096104	0.0098934	0.0044711	0.0015844	3
0.018752	0.014838	0.014445	0.016203	0.015583	0.014758	0.017847	0.011819	0.010691	0.0136	0.010056	0.0088762	0.0085477	0.011913	0.014419	0.021061	0.025426	0.019261	0.018558	0.012221	0.00057152	0.0033643	0.0057054	0.0084675	0.010632	0.013014	0.014699	0.0096717	0.0064274	0.0017934	0.0011243	0.0029967	0.0042022	0.010381	0.01511	0.014875	0.01169	0.0088229	0.0040973	0.00081967	3
0.076064	0.088006	0.10288	0.11354	0.1082	0.07824	0.071789	0.09635	0.11923	0.06683	0.050063	0.061827	0.15098	0.34822	0.082726	0.073114	0.070136	0.029363	0.034373	0.027986	0.0090184	0.014352	0.074849	0.077206	0.094127	0.091804	0.069138	0.015789	0.0097451	0.0041633	0.0043145	0.025926	0.069851	0.077361	0.10665	0.082743	0.054393	0.024305	0.012602	0.0028397	3
0.1154	0.065809	0.057695	0.051796	0.058808	0.047744	0.052911	0.079121	0.074163	0.096563	0.047803	0.048264	0.054767	0.055266	0.17901	0.14519	0.060997	0.046856	0.040484	0.038103	0.0042919	0.015661	0.046321	0.061607	0.051769	0.052745	0.054175	0.047748	0.014153	0.0053966	0.0064468	0.019146	0.050153	0.038186	0.057381	0.05609	0.062284	0.046665	0.0090495	0.0058571	3
0.05358	0.052896	0.041394	0.076349	0.07271	0.083865	0.093373	0.072798	0.10834	0.098935	0.04159	0.050819	0.058214	0.13441	0.21593	0.10547	0.052129	0.035095	0.032859	0.040039	0.0053418	0.0264	0.054785	0.078964	0.073366	0.060684	0.036109	0.023693	0.015556	0.0046946	0.0037673	0.0089838	0.03114	0.045647	0.070411	0.084453	0.086574	0.032249	0.0089626	0.0032873	3
0.063801	0.077163	0.090574	0.084534	0.080738	0.074095	0.083503	0.10091	0.11311	0.10846	0.060964	0.0516	0.21853	0.26186	0.047138	0.087044	0.046564	0.025111	0.031732	0.031697	0.0044728	0.038402	0.081017	0.097308	0.069723	0.073567	0.046374	0.023574	0.0050554	0.0026753	0.0021144	0.031462	0.06499	0.068575	0.079144	0.083136	0.063289	0.034147	0.011386	0.0034627	3
0.064362	0.075042	0.091058	0.0955	0.075829	0.075857	0.075323	0.097446	0.11155	0.11134	0.052637	0.04957	0.054486	0.2726	0.21644	0.049556	0.082968	0.034734	0.025885	0.031273	0.003894	0.019366	0.070105	0.1008	0.077368	0.071523	0.056799	0.029092	0.0076301	0.0019985	0.0020264	0.019432	0.060013	0.07108	0.076669	0.083016	0.06588	0.042193	0.013932	0.0036687	3
0.059785	0.064715	0.072363	0.074057	0.070042	0.061567	0.05429	0.063873	0.058418	0.073342	0.037112	0.027932	0.028823	0.071492	0.23992	0.13038	0.03298	0.03941	0.024858	0.035167	0.001414	0.004634	0.045344	0.059563	0.052748	0.06581	0.051997	0.033948	0.010897	0.0019072	0.0037684	0.0078956	0.037236	0.062047	0.062213	0.068927	0.046542	0.023341	0.014083	0.0066924	3
0.072821	0.090875	0.072022	0.086888	0.10863	0.093621	0.085204	0.099334	0.084988	0.067814	0.050397	0.040335	0.051098	0.15982	0.28749	0.12588	0.064473	0.034544	0.025391	0.031094	0.0050749	0.017192	0.050428	0.081447	0.082733	0.063907	0.072712	0.038939	0.011198	0.0045073	0.0032356	0.014107	0.035747	0.071464	0.11306	0.088393	0.071938	0.02074	0.0076765	0.0022545	3
0.045924	0.063686	0.076194	0.07822	0.094059	0.07274	0.094806	0.10515	0.092518	0.077165	0.040673	0.040988	0.056192	0.12786	0.22427	0.15354	0.068492	0.029213	0.029134	0.035628	0.0051961	0.016232	0.062012	0.06646	0.077182	0.07613	0.057016	0.024949	0.011041	0.0044443	0.0020386	0.013341	0.026458	0.06121	0.067737	0.11249	0.078529	0.027534	0.0081248	0.0023491	3
0.067224	0.07575	0.069662	0.072356	0.076124	0.066411	0.07157	0.059113	0.053831	0.067156	0.042136	0.039825	0.033752	0.04025	0.15941	0.25345	0.039883	0.030587	0.030775	0.031624	0.0020639	0.010507	0.044169	0.042053	0.060917	0.063699	0.05322	0.044168	0.010465	0.0049052	0.0026532	0.015707	0.024671	0.061149	0.06924	0.06049	0.066472	0.029004	0.0072677	0.0024096	3
0.088477	0.095295	0.064422	0.072916	0.075339	0.08426	0.066424	0.069139	0.071933	0.07391	0.044401	0.042006	0.047725	0.17007	0.27964	0.065065	0.034212	0.032809	0.02367	0.022993	0.0024439	0.013867	0.042443	0.065777	0.093466	0.062627	0.06471	0.027437	0.0062007	0.002701	0.0082522	0.017059	0.058941	0.068337	0.056742	0.071904	0.061567	0.025034	0.0093673	0.0031656	3
0.066669	0.073281	0.054797	0.06704	0.052629	0.052149	0.046524	0.043854	0.065936	0.066674	0.028337	0.040393	0.053527	0.15517	0.13372	0.037414	0.029246	0.042393	0.033164	0.032077	0.0023336	0.0091544	0.039983	0.04756	0.054371	0.05688	0.052779	0.018964	0.009684	0.0043619	0.0043793	0.018588	0.046338	0.044696	0.049585	0.03825	0.051874	0.02286	0.012542	0.0035659	3
0.074376	0.061222	0.070652	0.065716	0.068651	0.064144	0.059692	0.067093	0.051694	0.051861	0.04456	0.042964	0.033708	0.028714	0.023997	0.061272	0.21893	0.10991	0.028813	0.038072	0.0064021	0.013462	0.016056	0.034346	0.047844	0.07052	0.048633	0.046236	0.028507	0.0034472	0.0045142	0.0079406	0.0234	0.039796	0.068185	0.07129	0.040077	0.037778	0.021756	0.001833	3
0.062519	0.062191	0.051681	0.055699	0.060897	0.069146	0.064733	0.06065	0.056816	0.062544	0.035862	0.042258	0.029887	0.035782	0.044937	0.097069	0.20567	0.042756	0.032098	0.044054	0.0026865	0.0096652	0.024363	0.047432	0.056774	0.059371	0.043325	0.034504	0.017122	0.01053	0.0031051	0.016338	0.015039	0.036445	0.050351	0.066921	0.057551	0.045927	0.010852	0.0029852	3
0.070757	0.051481	0.068256	0.051233	0.055364	0.043818	0.041999	0.066379	0.066888	0.047556	0.023333	0.028407	0.040306	0.04395	0.15721	0.13685	0.041318	0.030956	0.039814	0.029129	0.0013724	0.0086246	0.021747	0.049986	0.05337	0.054032	0.04567	0.033763	0.010571	0.0034584	0.0034609	0.0094189	0.035912	0.045465	0.04913	0.03838	0.055978	0.028472	0.012646	0.0023608	3
0.05837	0.058476	0.054506	0.075756	0.066807	0.058501	0.065888	0.082378	0.061729	0.072539	0.036558	0.025587	0.040885	0.062144	0.1181	0.15007	0.10278	0.049076	0.037469	0.046178	0.0040002	0.011123	0.036862	0.053199	0.058841	0.053075	0.044583	0.04688	0.014589	0.0045032	0.0047706	0.0059505	0.017496	0.051763	0.063773	0.070264	0.058421	0.041427	0.011354	0.0052558	3
0.03933	0.04535	0.048455	0.044687	0.042423	0.04468	0.03619	0.038005	0.032848	0.030283	0.021277	0.029483	0.02831	0.024975	0.048359	0.1078	0.069314	0.03161	0.018412	0.024872	0.0014061	0.0060696	0.017802	0.030238	0.033244	0.037693	0.034755	0.024836	0.010401	0.004285	0.0025342	0.0081174	0.012455	0.034099	0.047435	0.042281	0.028766	0.016292	0.007379	0.0016956	3
0.037755	0.048541	0.053401	0.051628	0.057096	0.051002	0.056908	0.069947	0.044617	0.040037	0.02147	0.023703	0.022953	0.027653	0.037999	0.13934	0.15807	0.042354	0.022352	0.023946	0.0023967	0.005489	0.011389	0.033989	0.06069	0.056027	0.039648	0.03487	0.0098925	0.0018196	0.0037055	0.006309	0.012183	0.034303	0.047132	0.055318	0.050945	0.030766	0.010804	0.0043436	3
0.061825	0.066794	0.048453	0.077011	0.043929	0.049246	0.055971	0.050194	0.054113	0.051086	0.017333	0.030541	0.030647	0.091315	0.19167	0.088151	0.034796	0.027872	0.03187	0.025891	0.0014805	0.0099439	0.038049	0.038846	0.047975	0.048371	0.041266	0.040416	0.0097561	0.004012	0.0018088	0.0067187	0.030475	0.055109	0.056254	0.053721	0.047471	0.024475	0.0040307	0.0012345	3
0.048906	0.051743	0.045277	0.052731	0.067563	0.059725	0.062666	0.074126	0.040321	0.049246	0.044225	0.034519	0.01772	0.026888	0.03516	0.057004	0.17274	0.10236	0.031754	0.031629	0.0030143	0.01033	0.01781	0.040415	0.048142	0.044586	0.057421	0.034063	0.017381	0.0034821	0.001736	0.011605	0.016048	0.038666	0.043033	0.052548	0.056705	0.041644	0.013876	0.002282	3
0.050084	0.072342	0.057116	0.07467	0.063414	0.037655	0.053742	0.055418	0.053041	0.055295	0.038929	0.017968	0.027901	0.030967	0.063037	0.16936	0.13575	0.039249	0.030386	0.033767	0.0025699	0.0073555	0.021788	0.047449	0.052556	0.045934	0.038362	0.051172	0.016256	0.0034046	0.0029781	0.011427	0.01547	0.044667	0.061648	0.056152	0.047804	0.036393	0.010738	0.0013475	3
0.035848	0.026957	0.022601	0.027515	0.033834	0.03875	0.029386	0.027888	0.026934	0.03467	0.0075809	0.007367	0.0078216	0.0088521	0.0092793	0.011344	0.052399	0.10346	0.057474	0.039939	0.00084015	0.0028647	0.0042699	0.0069983	0.023478	0.033655	0.038323	0.020716	0.018483	0.0033051	0.001011	0.0020287	0.0035186	0.012056	0.031603	0.026687	0.025629	0.020071	0.020258	0.0098153	3
0.033258	0.028592	0.026149	0.029977	0.03815	0.029899	0.031165	0.028029	0.038848	0.034925	0.0059696	0.0066606	0.0074003	0.009244	0.011218	0.044404	0.09567	0.061341	0.043586	0.035937	0.00096426	0.0023017	0.0039334	0.011745	0.029934	0.038863	0.035852	0.02056	0.011222	0.0042364	0.00067412	0.0011865	0.0037742	0.020637	0.028956	0.029295	0.022354	0.023068	0.023532	0.0057631	3
0.035722	0.029205	0.025207	0.028347	0.032579	0.035414	0.029728	0.030159	0.031306	0.035532	0.0066549	0.0071208	0.0089664	0.0090279	0.010115	0.013397	0.091224	0.084016	0.045356	0.038024	0.00096311	0.0018815	0.0039735	0.0094981	0.02617	0.038005	0.035669	0.021843	0.017673	0.0019339	0.0010195	0.001865	0.0042959	0.01681	0.031457	0.026342	0.025826	0.018944	0.02054	0.010454	3
0.062006	0.053279	0.045475	0.038812	0.044745	0.033264	0.031766	0.038605	0.033906	0.026386	0.010631	0.0076612	0.012082	0.034706	0.057307	0.081716	0.072032	0.076263	0.045387	0.013372	0.0011075	0.0023589	0.0047016	0.005992	0.034551	0.069339	0.046101	0.029537	0.0077223	0.002179	0.0012452	0.0053639	0.023777	0.042156	0.030349	0.030096	0.023585	0.023093	0.020747	0.0043269	3
0.049012	0.046336	0.049305	0.038904	0.045628	0.049057	0.043814	0.04418	0.044277	0.062267	0.017561	0.072638	0.083442	0.084354	0.074968	0.047382	0.02553	0.019749	0.028411	0.02052	0.002255	0.018239	0.035386	0.039374	0.055465	0.035783	0.022474	0.011046	0.013305	0.0035835	0.0023836	0.02086	0.028606	0.031863	0.035957	0.05324	0.041391	0.013381	0.0047707	0.0021635	3
0.040917	0.041026	0.047878	0.051724	0.055119	0.045427	0.053386	0.050011	0.044722	0.039952	0.020188	0.018292	0.026673	0.019909	0.10236	0.10473	0.091199	0.058127	0.02094	0.017107	0.00044669	0.0069921	0.028162	0.032401	0.035881	0.042416	0.046406	0.032096	0.010912	0.0013751	0.0010482	0.003164	0.013659	0.03872	0.048755	0.054766	0.037846	0.026306	0.0092047	0.0016488	3
0.033726	0.035917	0.030467	0.030361	0.030385	0.042521	0.040841	0.048415	0.048806	0.049499	0.0058059	0.0056135	0.011677	0.025469	0.084123	0.097396	0.075505	0.057158	0.023383	0.015648	0.00051207	0.0012706	0.01152	0.033673	0.047366	0.036935	0.042999	0.016048	0.0029761	0.0024245	0.00069934	0.0033037	0.018283	0.02374	0.022974	0.02788	0.042777	0.039534	0.013172	0.0032417	3
0.033793	0.043216	0.039209	0.036537	0.04154	0.036338	0.032724	0.034908	0.030745	0.029249	0.0079375	0.0089325	0.01368	0.05982	0.1051	0.061693	0.024342	0.025577	0.029826	0.027397	0.00028276	0.0026824	0.009284	0.033953	0.032972	0.026503	0.045419	0.020515	0.006496	0.0012316	0.00083108	0.0087043	0.019802	0.025078	0.028771	0.031596	0.034874	0.019045	0.0087415	0.0012763	3
0.032946	0.037434	0.040331	0.037381	0.036114	0.030899	0.029874	0.035983	0.028297	0.029661	0.0064414	0.0094632	0.0095638	0.0093283	0.044719	0.11025	0.077347	0.028124	0.022251	0.028826	0.00047469	0.0017029	0.0055888	0.017705	0.042178	0.026021	0.038207	0.030887	0.0062411	0.0011024	0.0010445	0.0028003	0.014802	0.022158	0.029536	0.03146	0.029455	0.024527	0.010413	0.0036647	3
0.041184	0.050003	0.051452	0.047643	0.049946	0.04964	0.050696	0.040706	0.041105	0.038272	0.0084026	0.020044	0.016785	0.02962	0.020852	0.12552	0.10909	0.081954	0.038147	0.016328	0.00047408	0.0024168	0.010704	0.04362	0.038025	0.034659	0.037746	0.038222	0.021106	0.0028525	0.00013238	0.0019456	0.0073689	0.034962	0.057316	0.04722	0.033464	0.033685	0.012766	0.00094842	3
0.015796	0.014297	0.025023	0.018855	0.014526	0.019067	0.01572	0.018139	0.026113	0.034338	0.015683	0.019643	0.016327	0.013348	0.0353	0.030193	0.015003	0.023345	0.017136	0.018031	0.0025455	0.004113	0.0086926	0.018823	0.024596	0.016165	0.012332	0.0077126	0.0049516	0.0019095	0.0027715	0.0043932	0.0096475	0.0097851	0.013664	0.020599	0.017677	0.0089826	0.010447	0.0025999	3
0.02011	0.015199	0.01928	0.015931	0.017509	0.022352	0.037295	0.034449	0.027114	0.02375	0.016312	0.015047	0.02189	0.05224	0.036094	0.01411	0.026444	0.016181	0.016917	0.015993	0.0011281	0.0059799	0.018746	0.016948	0.024692	0.025171	0.011256	0.007833	0.003319	0.0013066	0.0033535	0.0053963	0.0073053	0.015229	0.020427	0.020022	0.025474	0.0089044	0.0072602	0.0020288	3
0.031077	0.034429	0.015151	0.013412	0.02154	0.025109	0.016438	0.015099	0.018632	0.017976	0.021777	0.030882	0.015009	0.025188	0.021451	0.021558	0.023235	0.018365	0.013828	0.016287	0.00075936	0.0062449	0.013205	0.010986	0.020037	0.018785	0.011796	0.014863	0.0060888	0.0017721	0.0019906	0.013597	0.0095247	0.0178	0.014155	0.015338	0.017753	0.0076214	0.0040189	0.0015417	3
0.015145	0.015131	0.016349	0.016799	0.020657	0.033597	0.034935	0.027187	0.023732	0.024607	0.013536	0.013092	0.021654	0.056749	0.036118	0.013675	0.024286	0.013244	0.016617	0.015862	0.0012946	0.005714	0.016263	0.020192	0.019103	0.025812	0.013693	0.0068944	0.0027786	0.0010732	0.0028899	0.0027318	0.0073248	0.017025	0.019964	0.022575	0.02307	0.011133	0.0046734	0.0020407	3
0.012089	0.025008	0.019397	0.013656	0.019731	0.016622	0.015841	0.02524	0.03639	0.036237	0.015248	0.020445	0.018141	0.01508	0.040013	0.03998	0.016565	0.022706	0.017291	0.017852	0.0048073	0.005262	0.012421	0.015909	0.02519	0.019448	0.0096858	0.0098252	0.005087	0.001587	0.00072088	0.0054218	0.0088974	0.01052	0.016376	0.023717	0.018358	0.01543	0.0073397	0.0030905	3
0.027812	0.032513	0.034099	0.027241	0.025551	0.019791	0.014534	0.021292	0.029077	0.044373	0.0203	0.021759	0.019984	0.015759	0.048854	0.067633	0.028044	0.019067	0.018486	0.022962	0.0020124	0.0093524	0.015152	0.016957	0.02235	0.025998	0.021621	0.011865	0.011563	0.0016512	0.0012499	0.0077392	0.011913	0.017746	0.031177	0.023961	0.021644	0.013431	0.0036387	0.0059269	3
0.022827	0.02289	0.016445	0.019086	0.018577	0.016243	0.021882	0.034988	0.035638	0.028999	0.015717	0.019648	0.014208	0.026789	0.050711	0.03149	0.01904	0.021898	0.019146	0.021749	0.0025796	0.0050324	0.015995	0.016656	0.024869	0.024377	0.011038	0.011235	0.0048847	0.0022866	0.0017781	0.0070788	0.0081433	0.012142	0.02071	0.021008	0.018902	0.019602	0.0054669	0.0036868	3
0.027147	0.026138	0.018013	0.016126	0.020878	0.028499	0.045646	0.044681	0.024533	0.029709	0.01867	0.03698	0.030735	0.048629	0.058764	0.030525	0.014098	0.010258	0.018619	0.016375	0.0032152	0.010685	0.028097	0.022048	0.019925	0.018086	0.021585	0.011987	0.0034422	0.0021309	0.0014785	0.0042565	0.015141	0.020972	0.033134	0.030427	0.017799	0.011949	0.0038162	0.0015332	3
0.017161	0.018626	0.025831	0.03191	0.031505	0.027477	0.023283	0.022352	0.0157	0.020959	0.019189	0.017963	0.012789	0.012071	0.033072	0.064629	0.030505	0.019247	0.017728	0.011577	0.001404	0.0044944	0.010278	0.018021	0.021727	0.021922	0.016032	0.017359	0.0038988	0.0011768	0.0014351	0.0036779	0.010661	0.017934	0.019544	0.027954	0.020593	0.009948	0.0040889	0.00075748	3
0.035495	0.035197	0.026186	0.025862	0.017221	0.016748	0.021369	0.031387	0.049216	0.03891	0.019044	0.026329	0.033969	0.028967	0.064622	0.058958	0.017652	0.016011	0.016368	0.023388	0.00076663	0.017896	0.019098	0.020518	0.019739	0.025603	0.024218	0.010736	0.006798	0.0042505	0.0042845	0.0057994	0.011044	0.022287	0.02745	0.033277	0.026102	0.0093555	0.0085482	0.0019129	3
0.0403	0.050568	0.051305	0.04528	0.031377	0.023896	0.028143	0.029004	0.039846	0.058018	0.019113	0.02266	0.026835	0.029885	0.10763	0.094853	0.033785	0.021892	0.02466	0.023066	0.0011457	0.0039075	0.026366	0.037032	0.02755	0.030514	0.040792	0.022473	0.0090762	0.0022264	0.0011985	0.0063345	0.026471	0.042329	0.026841	0.019799	0.033924	0.0359	0.0055228	0.0014514	3
0.04176	0.036955	0.046751	0.047961	0.038805	0.048969	0.053609	0.048894	0.032696	0.023674	0.026191	0.029223	0.025582	0.0377	0.042296	0.10533	0.080689	0.030653	0.017098	0.026928	0.00099522	0.010347	0.015241	0.023463	0.042882	0.0443	0.037052	0.022813	0.0096411	0.0023531	0.0015715	0.0093521	0.018317	0.026645	0.047335	0.047928	0.032274	0.014266	0.0089785	0.0029678	3
0.04182	0.047547	0.034922	0.047046	0.051061	0.04771	0.036683	0.029153	0.02775	0.027019	0.024806	0.02415	0.03446	0.036519	0.11427	0.061007	0.02422	0.021378	0.030085	0.020518	0.0011553	0.0074851	0.017271	0.022162	0.03847	0.044211	0.035534	0.021657	0.0053132	0.0015897	0.0031712	0.007561	0.021356	0.04244	0.045575	0.028732	0.017385	0.016846	0.0096718	0.002142	3
0.032418	0.034028	0.041256	0.038357	0.047145	0.049437	0.036348	0.047616	0.051318	0.044154	0.026072	0.024021	0.034009	0.042664	0.10795	0.086118	0.039295	0.017964	0.025537	0.019757	0.001813	0.0071056	0.024373	0.043118	0.042807	0.040917	0.02327	0.018194	0.0078181	0.001562	0.0021548	0.0070233	0.021635	0.029249	0.03881	0.041755	0.038479	0.020042	0.0076484	0.0037446	3
0.046353	0.045491	0.037721	0.049643	0.052579	0.047357	0.033267	0.024611	0.025175	0.026984	0.023827	0.024874	0.025519	0.033739	0.062316	0.11126	0.046724	0.021784	0.023589	0.02746	0.00079286	0.0053672	0.015927	0.022223	0.030417	0.044715	0.037076	0.026682	0.0081154	0.0021608	0.0041347	0.0074023	0.014256	0.041254	0.048255	0.032299	0.016633	0.017299	0.0095095	0.0024546	3
0.052246	0.056681	0.06746	0.054754	0.054973	0.058996	0.063712	0.053419	0.048109	0.052882	0.033308	0.065136	0.16262	0.16449	0.075258	0.024117	0.013359	0.0086551	0.0089651	0.0068461	0.0023708	0.019483	0.041844	0.065706	0.065999	0.052489	0.027172	0.0050563	0.0029613	0.00052148	0.0081989	0.033247	0.031341	0.059666	0.054932	0.048285	0.03788	0.004763	0.0036357	0.00055743	3
0.071936	0.065356	0.068604	0.085374	0.060469	0.061428	0.063417	0.0551	0.062262	0.061524	0.025797	0.073246	0.10335	0.17611	0.17944	0.060611	0.01224	0.010428	0.012228	0.010141	0.0012748	0.01052	0.054094	0.076896	0.057128	0.057349	0.053679	0.016022	0.0029088	0.0012206	0.0015442	0.023077	0.058884	0.071672	0.057457	0.041344	0.05535	0.014213	0.0041699	0.00098828	3
0.063972	0.090394	0.071583	0.067242	0.076734	0.07698	0.072461	0.069262	0.058112	0.064691	0.010695	0.023858	0.063264	0.09244	0.11161	0.14925	0.15302	0.069051	0.040143	0.013001	0.0013066	0.0031996	0.010562	0.049168	0.09694	0.092277	0.054411	0.042827	0.004567	0.00097009	0.0013497	0.011839	0.05082	0.051685	0.068689	0.054641	0.039134	0.046869	0.025141	0.0065612	3
0.049183	0.064539	0.072095	0.06379	0.06792	0.084876	0.059014	0.063394	0.064642	0.054439	0.068878	0.094689	0.16044	0.18183	0.077332	0.015276	0.012455	0.010849	0.0088676	0.0097171	0.0018679	0.040182	0.061322	0.052944	0.056496	0.062997	0.028936	0.0086286	0.0034399	0.0010806	0.0014694	0.026451	0.063476	0.071581	0.073129	0.043183	0.027306	0.0084405	0.0031292	0.0012764	3
0.06917	0.060402	0.051295	0.063378	0.06097	0.057825	0.051413	0.051067	0.0645	0.071816	0.021666	0.053475	0.13666	0.19814	0.11677	0.032679	0.016526	0.010592	0.0088853	0.00796	0.0044435	0.025242	0.045474	0.048715	0.066657	0.060971	0.031762	0.013545	0.0029837	0.00089471	0.0057431	0.021663	0.037994	0.071138	0.041514	0.074275	0.035482	0.0093107	0.0037767	0.00076258	3
0.036536	0.049926	0.070202	0.043102	0.045276	0.063303	0.061992	0.053197	0.052763	0.062839	0.028315	0.030909	0.029186	0.059589	0.16622	0.098909	0.03657	0.031593	0.031713	0.02972	0.0027599	0.0061199	0.028116	0.050262	0.056141	0.058486	0.041471	0.015752	0.0073707	0.0027001	0.0023018	0.010887	0.022474	0.04526	0.046976	0.057513	0.031754	0.032077	0.014489	0.0055954	3
0.055849	0.058106	0.069937	0.08956	0.088303	0.058599	0.072472	0.08183	0.063304	0.059366	0.034631	0.044479	0.067076	0.069479	0.098176	0.18304	0.095187	0.038834	0.043475	0.04246	0.0014506	0.013879	0.031594	0.064955	0.06666	0.058092	0.052122	0.037795	0.013528	0.007627	0.0041937	0.0076901	0.027766	0.0597	0.061362	0.082808	0.051581	0.041401	0.0093595	0.002934	3
0.039467	0.061206	0.056145	0.036172	0.063327	0.058055	0.063431	0.054016	0.055054	0.070704	0.035361	0.02877	0.035567	0.028545	0.074726	0.17518	0.086349	0.037106	0.032525	0.031754	0.0037688	0.01416	0.019716	0.040508	0.058311	0.053454	0.049032	0.027709	0.0089144	0.0020842	0.0018726	0.0086451	0.019239	0.04705	0.044782	0.063592	0.03213	0.038883	0.015478	0.0071005	3
0.050279	0.067695	0.043245	0.050233	0.060037	0.06519	0.057039	0.054838	0.069463	0.080853	0.032433	0.0396	0.03548	0.042986	0.17258	0.13809	0.044111	0.040038	0.033108	0.032811	0.0050876	0.015662	0.027189	0.046197	0.060552	0.058803	0.051235	0.024159	0.0078354	0.0022185	0.0039634	0.0094505	0.028797	0.04296	0.061203	0.049575	0.04794	0.031657	0.019225	0.0051225	3
0.07128	0.088236	0.10036	0.059295	0.072396	0.083543	0.062482	0.061355	0.046788	0.067488	0.037355	0.065529	0.071307	0.076242	0.15502	0.15005	0.058994	0.047178	0.033029	0.028875	0.0021562	0.009525	0.029119	0.073988	0.072102	0.054382	0.062147	0.030335	0.017539	0.0039474	0.0033519	0.016922	0.051441	0.06547	0.073553	0.055972	0.04624	0.030684	0.011719	0.0022788	3
0.059168	0.056678	0.072355	0.063635	0.079211	0.069363	0.05349	0.05986	0.065975	0.050352	0.036122	0.033423	0.058307	0.048794	0.045206	0.086093	0.15693	0.099386	0.037368	0.029719	0.0021223	0.011153	0.016727	0.038088	0.075615	0.058603	0.046137	0.053036	0.0089711	0.0030409	0.0025459	0.0096251	0.026074	0.053612	0.065946	0.049118	0.041629	0.036539	0.024901	0.0043085	3
0.071115	0.063241	0.070641	0.069254	0.050061	0.058228	0.064441	0.054524	0.053543	0.06096	0.036067	0.065929	0.043392	0.039609	0.062405	0.15897	0.10101	0.048754	0.033618	0.039404	0.0044007	0.011286	0.016342	0.038161	0.08065	0.057196	0.045376	0.038047	0.010227	0.0049136	0.0023634	0.016464	0.044049	0.050733	0.050103	0.044897	0.039901	0.035848	0.018345	0.0069331	3
0.053456	0.059625	0.046327	0.079983	0.070115	0.058904	0.056298	0.049849	0.061451	0.05687	0.043902	0.055972	0.026452	0.033024	0.054821	0.18004	0.1178	0.039012	0.033673	0.023266	0.0054712	0.011762	0.025442	0.04756	0.052802	0.059877	0.041249	0.032819	0.017286	0.0024995	0.0030844	0.01124	0.02443	0.039768	0.070343	0.06477	0.038826	0.029547	0.011005	0.004474	3
0.06817	0.048699	0.054602	0.055749	0.059962	0.081047	0.059864	0.061777	0.054064	0.059558	0.039976	0.051653	0.046711	0.026037	0.03466	0.092632	0.18307	0.07155	0.037984	0.024863	0.0037143	0.015277	0.019505	0.04254	0.058318	0.060957	0.039618	0.042439	0.017169	0.0028298	0.0045818	0.014128	0.017981	0.041346	0.048457	0.065188	0.05969	0.035132	0.01371	0.0026332	3
0.06639	0.057702	0.057911	0.061896	0.046599	0.059389	0.056632	0.059443	0.080636	0.061771	0.03346	0.038721	0.058438	0.028241	0.026341	0.071929	0.17235	0.10761	0.046094	0.032804	0.0017531	0.0088299	0.027129	0.042601	0.057129	0.046038	0.05897	0.044565	0.013178	0.0040128	0.0025577	0.013285	0.021944	0.047268	0.046858	0.047996	0.039668	0.055609	0.027006	0.0026191	3
0.08375	0.071128	0.075388	0.058486	0.067992	0.083475	0.098685	0.061115	0.064621	0.054587	0.039785	0.07634	0.15024	0.15853	0.045706	0.030789	0.055324	0.064966	0.038419	0.052315	0.0020286	0.021342	0.042825	0.041314	0.063796	0.11381	0.044067	0.014774	0.0085527	0.0059111	0.0050606	0.036217	0.052882	0.056527	0.055114	0.047544	0.056356	0.021817	0.020258	0.0055346	3
0.076043	0.060273	0.068026	0.0885	0.092591	0.056936	0.063178	0.050567	0.042751	0.051749	0.036677	0.054518	0.10488	0.16522	0.047794	0.030601	0.056606	0.065732	0.042875	0.046132	0.0036211	0.013002	0.036618	0.0459	0.045041	0.064905	0.077994	0.024295	0.009597	0.0035868	0.0015582	0.02958	0.052151	0.049184	0.044432	0.065256	0.041142	0.026694	0.009587	0.0044167	3
0.072714	0.078605	0.059058	0.067754	0.096159	0.085701	0.055645	0.064738	0.050163	0.049117	0.05427	0.035935	0.056939	0.1247	0.16162	0.050193	0.028373	0.057728	0.064959	0.037195	0.0070385	0.0089561	0.034367	0.050107	0.046567	0.064172	0.092186	0.023658	0.0079223	0.0028325	0.0037776	0.014493	0.055236	0.060984	0.056431	0.045119	0.057904	0.023285	0.016228	0.0037843	3
0.08988	0.093428	0.11714	0.079313	0.06246	0.077316	0.078322	0.06876	0.062269	0.061436	0.032166	0.089951	0.22204	0.19408	0.07062	0.039882	0.037134	0.030708	0.027409	0.041264	0.0045636	0.01703	0.050988	0.079682	0.071101	0.086688	0.042019	0.01977	0.010308	0.011058	0.0032993	0.03697	0.074745	0.06916	0.078021	0.066084	0.039419	0.017808	0.0068794	0.0035364	3
0.11018	0.057099	0.061135	0.060871	0.04507	0.058142	0.045727	0.043982	0.036083	0.044304	0.05588	0.035291	0.056457	0.045007	0.11808	0.05983	0.036835	0.04742	0.067486	0.043257	0.0036955	0.0096548	0.024203	0.036015	0.048365	0.056217	0.040707	0.018067	0.032911	0.013908	0.0067512	0.020053	0.034126	0.04095	0.062823	0.04306	0.03678	0.022945	0.0093619	0.0031984	3
0.054446	0.062296	0.04325	0.053547	0.04611	0.044275	0.037545	0.042165	0.050449	0.061181	0.044704	0.036023	0.039912	0.054393	0.095046	0.074145	0.043672	0.033461	0.034556	0.039213	0.0044087	0.011321	0.020183	0.047685	0.040233	0.049077	0.03746	0.018087	0.012645	0.0069222	0.0034706	0.016816	0.030253	0.033203	0.04348	0.043366	0.029213	0.032293	0.010979	0.0042272	3
0.043971	0.042554	0.033612	0.043346	0.052171	0.050897	0.038101	0.056198	0.045339	0.073306	0.034676	0.029264	0.045093	0.090532	0.092334	0.056223	0.041871	0.04129	0.027714	0.026188	0.0056001	0.015357	0.029623	0.036693	0.048914	0.046047	0.033008	0.015529	0.0082377	0.0027537	0.0020953	0.013163	0.02758	0.02794	0.040717	0.041307	0.048382	0.025324	0.011647	0.002523	3
0.07858	0.07885	0.070658	0.058724	0.06687	0.1029	0.075673	0.053301	0.063325	0.043783	0.034481	0.057783	0.11198	0.17554	0.085682	0.028616	0.037549	0.078545	0.039254	0.04131	0.0019698	0.013058	0.041621	0.040085	0.053376	0.097723	0.070077	0.015207	0.0085843	0.0032736	0.0031155	0.029963	0.054917	0.057863	0.056707	0.040731	0.055427	0.020321	0.017908	0.0052642	3
0.053431	0.063329	0.051965	0.049289	0.058993	0.042814	0.040288	0.038765	0.050085	0.056146	0.053337	0.038126	0.043797	0.043686	0.073358	0.10041	0.058592	0.035807	0.032097	0.034848	0.0039745	0.012024	0.017284	0.046323	0.04314	0.048977	0.042822	0.023015	0.01005	0.0049335	0.0040462	0.018464	0.034446	0.0344	0.045099	0.04382	0.02867	0.026906	0.016061	0.0039969	3
0.051127	0.043356	0.038842	0.04112	0.049128	0.060109	0.03877	0.04359	0.052864	0.053263	0.033911	0.031659	0.030065	0.057069	0.089586	0.084927	0.048201	0.041359	0.040797	0.024531	0.0028109	0.009976	0.024686	0.031829	0.046565	0.052502	0.036277	0.020442	0.0081573	0.0031674	0.0042894	0.010786	0.02733	0.031676	0.034835	0.042687	0.038765	0.02998	0.013233	0.0032552	3
0.035345	0.043266	0.047872	0.044715	0.062288	0.055876	0.055571	0.076133	0.072729	0.038575	0.027744	0.024	0.017398	0.073168	0.1894	0.072609	0.032108	0.034046	0.034113	0.028412	0.0025701	0.0071295	0.028076	0.053157	0.057631	0.056334	0.033753	0.01567	0.0090766	0.003946	0.0042108	0.0092244	0.019127	0.031289	0.046187	0.064255	0.055423	0.024153	0.0091843	0.0024171	3
0.031835	0.033847	0.05298	0.058206	0.038705	0.033546	0.039188	0.050016	0.045623	0.058528	0.039405	0.030727	0.025662	0.048956	0.10474	0.086629	0.033113	0.025349	0.026489	0.028485	0.0028907	0.0095435	0.028765	0.041403	0.037764	0.046579	0.02628	0.01927	0.0080308	0.0015087	0.0031221	0.0072238	0.017947	0.048093	0.040755	0.026908	0.032713	0.028382	0.011473	0.0050192	3
0.043357	0.035509	0.035133	0.042992	0.044703	0.048738	0.062676	0.052865	0.065044	0.082393	0.028492	0.021313	0.038693	0.12215	0.12935	0.042263	0.032001	0.034533	0.034729	0.031867	0.0023018	0.011526	0.039592	0.052235	0.055776	0.040914	0.026547	0.013561	0.0081915	0.0051714	0.0033466	0.016281	0.017158	0.026909	0.03761	0.054874	0.057549	0.027907	0.009777	0.0053205	3
0.040003	0.056144	0.059622	0.057218	0.058767	0.054702	0.070449	0.083943	0.054641	0.045938	0.057572	0.03146	0.027112	0.022203	0.036347	0.1414	0.15266	0.045946	0.036961	0.035232	0.0032134	0.0094947	0.016523	0.041038	0.070053	0.058819	0.050164	0.027453	0.0099057	0.0025272	0.0049229	0.021968	0.015314	0.03157	0.038751	0.05528	0.062757	0.042509	0.012691	0.0037822	3
0.068133	0.054376	0.038645	0.03209	0.036997	0.069755	0.044461	0.037449	0.033587	0.041605	0.040073	0.031404	0.025595	0.050033	0.080004	0.094467	0.047223	0.040095	0.029089	0.023878	0.0043544	0.0097794	0.022196	0.030956	0.050213	0.026652	0.027457	0.03108	0.020749	0.0025696	0.0045448	0.0093103	0.017089	0.042528	0.054877	0.050846	0.020894	0.017843	0.0067793	0.0038219	3
0.11586	0.091273	0.14868	0.1234	0.097745	0.076141	0.064279	0.077872	0.13648	0.085416	0.017916	0.020161	0.070348	0.31715	0.28465	0.19322	0.077023	0.021989	0.019531	0.019514	0.0015197	0.017501	0.072733	0.076759	0.10248	0.088029	0.071687	0.064293	0.015458	0.0024663	0.0011032	0.0052616	0.038119	0.19068	0.087814	0.063795	0.0948	0.022673	0.0085658	0.0021203	3
0.17323	0.11116	0.15105	0.10596	0.10184	0.15325	0.12696	0.09458	0.070616	0.055824	0.025423	0.02164	0.026914	0.036131	0.16676	0.19466	0.24908	0.24757	0.12496	0.058915	0.0010812	0.0057589	0.017794	0.088567	0.093358	0.079587	0.082959	0.08294	0.090457	0.027297	0.0029431	0.018833	0.01006	0.039713	0.12732	0.23207	0.099799	0.033162	0.009734	0.0025346	3
0.12484	0.13826	0.094344	0.13333	0.13397	0.11944	0.081622	0.066361	0.065596	0.11431	0.024409	0.01977	0.02017	0.031658	0.22122	0.2464	0.25502	0.17707	0.071132	0.025372	0.0018045	0.0046942	0.038094	0.071351	0.10696	0.08615	0.071059	0.074499	0.066477	0.013531	0.0051017	0.0059196	0.0080286	0.038908	0.20992	0.13239	0.051827	0.061231	0.017315	0.0029354	3
0.16205	0.15295	0.12123	0.13759	0.09369	0.13121	0.14136	0.11618	0.078772	0.064836	0.022366	0.02807	0.044467	0.14328	0.1821	0.2431	0.27942	0.16978	0.087235	0.021478	0.0013785	0.006598	0.059507	0.090315	0.082534	0.083639	0.089197	0.10729	0.071777	0.0074492	0.0026535	0.022868	0.0099864	0.06925	0.15111	0.23599	0.078892	0.021796	0.0049153	0.0020051	3
0.15234	0.1006	0.11196	0.14479	0.1235	0.086858	0.07043	0.060492	0.098449	0.12564	0.022696	0.018515	0.019636	0.033289	0.25148	0.26849	0.26453	0.14631	0.054557	0.022994	0.0015843	0.0054489	0.045344	0.073562	0.10097	0.092805	0.072685	0.070051	0.063243	0.013188	0.0045501	0.0044902	0.0093727	0.068707	0.21731	0.08106	0.063142	0.074861	0.015455	0.0026756	3
0.031926	0.055103	0.034079	0.034017	0.036816	0.033156	0.04019	0.029157	0.026867	0.021863	0.040433	0.032749	0.020937	0.025375	0.091069	0.050569	0.032022	0.018546	0.019552	0.013816	0.0016971	0.0036471	0.011071	0.025726	0.048057	0.038533	0.021964	0.013758	0.0046703	0.0015927	0.0050298	0.02308	0.019089	0.015156	0.028949	0.034681	0.025278	0.01096	0.004922	0.0021611	3
0.031526	0.040214	0.033431	0.040496	0.032609	0.030165	0.021229	0.023134	0.023553	0.026177	0.022257	0.018436	0.012701	0.014655	0.067577	0.071472	0.036801	0.027273	0.018824	0.016309	0.0025448	0.004866	0.0081961	0.017281	0.026341	0.038414	0.03059	0.01515	0.0068432	0.0019059	0.0042843	0.007041	0.0084546	0.02794	0.036252	0.028489	0.017789	0.010976	0.0071986	0.0028868	3
0.032114	0.028045	0.028028	0.035611	0.034179	0.031818	0.052532	0.043502	0.029756	0.042437	0.034402	0.046604	0.027762	0.058086	0.067613	0.04969	0.027934	0.020707	0.019567	0.013786	0.0021351	0.013074	0.034638	0.027331	0.031315	0.031458	0.021982	0.0099292	0.0073395	0.0018457	0.0018837	0.0080931	0.018053	0.033312	0.046395	0.026746	0.017243	0.022762	0.0063162	0.0018382	3
0.031918	0.025828	0.021184	0.023334	0.022615	0.025055	0.029141	0.021909	0.020422	0.027637	0.012915	0.018049	0.014436	0.019529	0.065053	0.032417	0.026153	0.019425	0.018183	0.02506	0.0011598	0.0062699	0.012435	0.015871	0.015671	0.021538	0.028476	0.016284	0.0059901	0.00094762	0.0011567	0.0032607	0.016582	0.01995	0.019884	0.019841	0.017678	0.018019	0.0066851	0.0017639	3
0.045418	0.054289	0.032369	0.036513	0.035068	0.04268	0.034213	0.028334	0.023008	0.02017	0.027018	0.020163	0.04336	0.025914	0.023184	0.03041	0.093924	0.044382	0.027239	0.016155	0.0013476	0.0047849	0.009309	0.015146	0.029469	0.04451	0.037825	0.020689	0.0087785	0.0018436	0.0023105	0.015494	0.027205	0.021405	0.019157	0.03097	0.030293	0.019145	0.0072324	0.0015614	3
0.058691	0.040874	0.030601	0.022167	0.0329	0.031801	0.069014	0.044403	0.045331	0.035706	0.023096	0.030389	0.01956	0.019558	0.023178	0.02711	0.047947	0.12039	0.06804	0.035968	0.0049569	0.0064473	0.015585	0.019753	0.031029	0.045926	0.020173	0.021163	0.036476	0.0047905	0.0020861	0.0053995	0.0067791	0.022405	0.046275	0.036497	0.032799	0.036472	0.017617	0.0026621	3
0.091856	0.064885	0.044785	0.031403	0.023525	0.031118	0.033271	0.061491	0.049602	0.043938	0.015783	0.031317	0.023815	0.020685	0.021267	0.025273	0.051163	0.15308	0.099288	0.039336	0.001546	0.0081047	0.015697	0.017641	0.04297	0.035234	0.021289	0.032791	0.063105	0.0037357	0.0023806	0.00808	0.0071413	0.031383	0.055528	0.046502	0.023884	0.035229	0.026042	0.003942	3
0.072578	0.058797	0.034543	0.028819	0.022941	0.034576	0.039362	0.06777	0.042129	0.042482	0.029543	0.025635	0.018613	0.020888	0.023046	0.028175	0.1114	0.12334	0.04169	0.01983	0.0037191	0.0091054	0.015662	0.022372	0.045978	0.02837	0.021484	0.040443	0.03571	0.0020264	0.0030398	0.0054726	0.0079466	0.037693	0.049357	0.036643	0.028458	0.034221	0.019622	0.0019227	3
0.090872	0.064218	0.058946	0.051639	0.035854	0.034576	0.06465	0.083546	0.094998	0.054227	0.031336	0.025665	0.022642	0.054731	0.19036	0.18416	0.070164	0.025517	0.019053	0.033594	0.0047182	0.014469	0.014993	0.060424	0.069074	0.040568	0.074434	0.025075	0.0068768	0.0076266	0.0017338	0.0083981	0.041348	0.044357	0.070476	0.04419	0.05171	0.038401	0.0056012	0.0096555	3
0.060823	0.059502	0.077584	0.086167	0.089101	0.063629	0.047716	0.030484	0.024209	0.027286	0.02987	0.040122	0.022572	0.019177	0.051781	0.10923	0.093582	0.12518	0.039891	0.043607	0.0020634	0.0046119	0.010697	0.021326	0.033185	0.058946	0.10037	0.024939	0.013149	0.010509	0.0023795	0.0074655	0.031114	0.052946	0.037761	0.059272	0.048171	0.030787	0.0095663	0.0028953	3
0.064413	0.056719	0.042008	0.034762	0.022904	0.032466	0.023155	0.024003	0.025517	0.038896	0.019206	0.024698	0.020575	0.031561	0.10811	0.073547	0.017821	0.032445	0.027831	0.017018	0.0028766	0.0090299	0.013214	0.018613	0.022568	0.031731	0.054155	0.018787	0.0091813	0.0045575	0.0024876	0.0093441	0.026939	0.039737	0.028528	0.028024	0.026116	0.017494	0.0043818	0.0015406	3
0.0386	0.029123	0.023472	0.031281	0.024837	0.02727	0.024746	0.037529	0.026839	0.015204	0.022726	0.019929	0.011688	0.046349	0.074556	0.017657	0.021172	0.021749	0.016641	0.026371	0.0022321	0.0079333	0.010463	0.018936	0.021784	0.027071	0.027748	0.014309	0.0073806	0.001642	0.0014251	0.0049258	0.022735	0.016861	0.03028	0.029524	0.014186	0.0080214	0.0052944	0.005394	3
0.024806	0.033251	0.027719	0.03495	0.03931	0.026561	0.017752	0.027241	0.03141	0.046655	0.022697	0.014154	0.027369	0.068012	0.03984	0.015771	0.017658	0.018939	0.035935	0.047202	0.001429	0.0054428	0.022079	0.025031	0.02769	0.019662	0.018727	0.019688	0.0087355	0.0060605	0.0017103	0.0059481	0.018924	0.023319	0.019135	0.025586	0.024266	0.021881	0.0085755	0.0072331	3
0.019517	0.027397	0.03779	0.037593	0.03913	0.058369	0.069854	0.055418	0.058745	0.069222	0.020226	0.055129	0.14178	0.032311	0.037563	0.042458	0.046641	0.029688	0.029566	0.037765	0.002119	0.016793	0.037827	0.059526	0.047832	0.026405	0.021757	0.014938	0.006056	0.0013851	0.0015336	0.011466	0.022282	0.031028	0.043061	0.042913	0.027537	0.036544	0.016068	0.0036431	3
0.064891	0.057597	0.041542	0.034749	0.022592	0.033597	0.024066	0.025194	0.024584	0.03915	0.020419	0.02811	0.016858	0.043257	0.12417	0.04719	0.017376	0.034728	0.024056	0.016973	0.0041169	0.0088709	0.013918	0.018444	0.023216	0.033515	0.054262	0.014303	0.010225	0.0036564	0.0025053	0.010593	0.029805	0.038803	0.027507	0.028445	0.02646	0.015456	0.0042239	0.0015239	3
0.10398	0.096245	0.11942	0.11289	0.11553	0.10096	0.1057	0.11871	0.12698	0.097788	0.030688	0.022947	0.057397	0.12061	0.31517	0.25814	0.13191	0.027841	0.029111	0.12594	0.0015576	0.0079918	0.028639	0.094388	0.094304	0.16962	0.10377	0.041557	0.0095965	0.004996	0.0017561	0.027815	0.06541	0.079612	0.074963	0.090576	0.078896	0.071016	0.049975	0.010351	3
0.20441	0.19247	0.17368	0.12467	0.11711	0.14543	0.099774	0.096911	0.12017	0.1082	0.029851	0.032735	0.091989	0.1954	0.2179	0.27625	0.23528	0.083896	0.11657	0.12361	0.0045972	0.015488	0.034574	0.12124	0.10669	0.11347	0.098185	0.082062	0.068186	0.044948	0.0016988	0.017168	0.068335	0.0854	0.16918	0.17087	0.10145	0.060928	0.013086	0.003413	3
0.13028	0.10307	0.10349	0.12553	0.1116	0.11424	0.075343	0.08271	0.094406	0.10294	0.039162	0.03787	0.030919	0.034296	0.11106	0.14323	0.36045	0.20208	0.071772	0.017227	0.001698	0.0067879	0.020109	0.042152	0.1072	0.10312	0.14333	0.068159	0.024901	0.0024325	0.0044577	0.013627	0.047378	0.086201	0.088447	0.075816	0.079259	0.074665	0.04525	0.009432	3
0.12838	0.16125	0.18651	0.21428	0.14623	0.11627	0.12388	0.12537	0.099069	0.10187	0.024245	0.02898	0.13005	0.26598	0.20823	0.21707	0.1804	0.092521	0.13958	0.13862	0.0062976	0.0084894	0.059695	0.098968	0.11249	0.10957	0.14916	0.075129	0.065946	0.021763	0.0013152	0.02758	0.069456	0.084883	0.11295	0.19345	0.14561	0.060906	0.0063926	0.0027917	3
0.14142	0.13088	0.2032	0.18197	0.19236	0.12999	0.11143	0.1409	0.10472	0.099468	0.024424	0.023038	0.12469	0.26975	0.21034	0.19388	0.19938	0.091802	0.15849	0.15187	0.0052973	0.0078374	0.060141	0.10547	0.10696	0.12452	0.1451	0.079413	0.06343	0.023312	0.0016148	0.027659	0.066431	0.089751	0.11456	0.16952	0.16361	0.077261	0.00777	0.0022663	3
0.13293	0.17782	0.16893	0.12809	0.11355	0.11306	0.11712	0.1015	0.10768	0.12601	0.030508	0.020908	0.149	0.25334	0.21441	0.19235	0.056747	0.15394	0.1532	0.064294	0.0014845	0.013567	0.058136	0.096264	0.14403	0.12052	0.059272	0.06395	0.077765	0.0075177	0.0018285	0.030677	0.075462	0.074757	0.12473	0.1385	0.12465	0.04777	0.020056	0.0072165	3
0.1015	0.11179	0.131	0.15559	0.12813	0.16343	0.18072	0.14971	0.11433	0.11391	0.08005	0.16231	0.33815	0.18095	0.088201	0.025532	0.086514	0.16662	0.15075	0.065709	0.0014107	0.031396	0.099005	0.089423	0.1813	0.13712	0.078903	0.040455	0.019604	0.0051622	0.021318	0.067798	0.07064	0.077435	0.095973	0.096154	0.12941	0.089783	0.0185	0.0082613	3
0.11485	0.11148	0.11581	0.11348	0.10063	0.11559	0.11561	0.10571	0.11443	0.10794	0.025316	0.015103	0.067675	0.17287	0.29052	0.2663	0.12533	0.059216	0.058177	0.057357	0.00087747	0.0041574	0.028872	0.12878	0.10423	0.1246	0.10783	0.03001	0.022996	0.0063152	0.0044802	0.0261	0.055703	0.067814	0.12463	0.08885	0.083114	0.082208	0.01902	0.0065892	3
0.11134	0.1098	0.11682	0.10857	0.10463	0.12202	0.10663	0.11199	0.1105	0.10049	0.023117	0.014428	0.019369	0.11401	0.2412	0.34402	0.19987	0.057029	0.062369	0.060173	0.0014155	0.0033134	0.018413	0.092221	0.13037	0.10545	0.12727	0.043688	0.01904	0.0090508	0.0020071	0.019416	0.049221	0.064559	0.11869	0.092425	0.078862	0.089107	0.030839	0.0059458	3
0.10662	0.12756	0.1508	0.12592	0.15777	0.17781	0.15189	0.116	0.11502	0.11505	0.036054	0.09234	0.28308	0.24234	0.14856	0.072276	0.043639	0.14603	0.17541	0.095283	0.0034061	0.0092053	0.08247	0.12653	0.099627	0.17186	0.090425	0.049927	0.031266	0.007409	0.012202	0.057943	0.068143	0.082259	0.088185	0.11118	0.13769	0.086462	0.022101	0.0070829	3
0.18581	0.14841	0.11362	0.11933	0.11647	0.11215	0.10718	0.12407	0.11865	0.11014	0.026178	0.15583	0.24814	0.28127	0.16464	0.08099	0.12425	0.097722	0.055941	0.043898	0.0032516	0.026659	0.090906	0.095227	0.14411	0.11733	0.038845	0.066297	0.043172	0.0049927	0.015242	0.058455	0.060669	0.11803	0.13279	0.11506	0.073837	0.041193	0.015495	0.0044601	3
0.11201	0.11113	0.11356	0.1085	0.10189	0.11968	0.11041	0.10946	0.11317	0.10325	0.01942	0.012145	0.062025	0.16936	0.28904	0.2734	0.13245	0.057644	0.058153	0.053867	0.00046525	0.0035491	0.027532	0.12208	0.11196	0.11899	0.10974	0.030276	0.021798	0.0071911	0.0025818	0.024819	0.053544	0.068898	0.12648	0.083089	0.085582	0.082545	0.017182	0.0063528	3
0.16555	0.12319	0.11725	0.11965	0.11477	0.10779	0.1152	0.12713	0.10943	0.12011	0.024887	0.15061	0.24765	0.3104	0.16261	0.076207	0.10637	0.066756	0.050777	0.04141	0.0018728	0.018193	0.10961	0.090696	0.13415	0.13522	0.0362	0.05113	0.029327	0.00327	0.015084	0.05701	0.064782	0.10509	0.12814	0.091433	0.083394	0.045501	0.013609	0.0049208	3
0.1148	0.10832	0.11571	0.11257	0.095031	0.077475	0.08392	0.093914	0.10236	0.12825	0.014038	0.015536	0.03747	0.10876	0.21656	0.28094	0.098744	0.097392	0.090676	0.096963	0.00079397	0.0063729	0.015099	0.060623	0.11907	0.11919	0.12789	0.048601	0.016817	0.0052505	0.0015639	0.021836	0.047262	0.07837	0.097754	0.072997	0.061543	0.064642	0.042057	0.0303	3
0.11347	0.10069	0.079245	0.087691	0.094969	0.10324	0.13152	0.15566	0.13451	0.1549	0.016103	0.018938	0.030439	0.06915	0.19361	0.23832	0.15209	0.10541	0.16099	0.18351	0.0036189	0.0094636	0.037115	0.054806	0.10177	0.14707	0.13389	0.053626	0.020621	0.016509	0.0007525	0.0054735	0.045689	0.075341	0.064827	0.081609	0.10201	0.10731	0.075368	0.027251	3
0.074141	0.039384	0.047691	0.031869	0.031748	0.035617	0.038447	0.022169	0.028031	0.055218	0.03237	0.025676	0.028696	0.018861	0.016511	0.025712	0.1029	0.085876	0.03388	0.03987	0.0035345	0.009446	0.011816	0.018225	0.031324	0.032995	0.028928	0.041835	0.025091	0.0014622	0.0022483	0.0088859	0.010215	0.049701	0.035055	0.028231	0.026525	0.016138	0.010405	0.015271	3
0.10068	0.045635	0.039504	0.030522	0.031932	0.035911	0.040369	0.02521	0.022026	0.036399	0.025583	0.025778	0.015354	0.015398	0.044912	0.1304	0.09602	0.024958	0.027609	0.022737	0.0020388	0.0082684	0.011801	0.016202	0.028509	0.030478	0.039426	0.054605	0.0098147	0.0019172	0.0015632	0.0044166	0.032944	0.051386	0.032956	0.024277	0.026774	0.011605	0.011777	0.0059442	3
0.12634	0.075418	0.039352	0.044473	0.031955	0.033947	0.037706	0.036449	0.020609	0.024653	0.029021	0.029241	0.020625	0.015073	0.014736	0.087453	0.17997	0.071682	0.020038	0.01874	0.0017884	0.0078916	0.014785	0.017555	0.022314	0.029434	0.03792	0.070797	0.033604	0.0018013	0.00115	0.0084892	0.013569	0.092822	0.038164	0.03345	0.020107	0.021106	0.0075555	0.0021819	3
0.051195	0.038016	0.032521	0.03105	0.034471	0.039368	0.029833	0.021906	0.030709	0.052148	0.033305	0.025256	0.014365	0.014522	0.038577	0.094973	0.049045	0.034561	0.034694	0.028068	0.0030575	0.0089133	0.012532	0.018537	0.034851	0.028595	0.035375	0.030763	0.0054046	0.0027667	0.0014914	0.0043362	0.029772	0.029722	0.027829	0.028593	0.019419	0.012409	0.020543	0.0073103	3
0.055461	0.14532	0.10001	0.041612	0.043406	0.030029	0.030169	0.035543	0.047319	0.023876	0.02636	0.021352	0.015513	0.017051	0.032276	0.20928	0.18174	0.027721	0.018018	0.019017	0.001933	0.01068	0.0095257	0.01991	0.031054	0.041616	0.075544	0.076359	0.0062698	0.0021097	0.0024119	0.0042139	0.0092886	0.096784	0.074307	0.03362	0.018446	0.026889	0.0082154	0.0025062	3
0.028356	0.045499	0.071204	0.02828	0.078245	0.13689	0.089107	0.042067	0.05233	0.028631	0.02745	0.019443	0.014505	0.012741	0.016841	0.085	0.24549	0.13627	0.019567	0.015482	0.0043974	0.0079086	0.0066184	0.017203	0.052744	0.099403	0.070626	0.028497	0.0080714	0.0019084	0.0022124	0.0072332	0.0075032	0.026707	0.053194	0.059089	0.097546	0.027663	0.013844	0.0013857	3
0.02642	0.05438	0.065756	0.02236	0.096191	0.12759	0.082847	0.034352	0.044858	0.030283	0.015644	0.011326	0.013549	0.042335	0.22202	0.20908	0.0312	0.014591	0.015631	0.018449	0.0016255	0.0037083	0.012123	0.038259	0.084228	0.086029	0.045514	0.012397	0.0042383	0.0017003	0.0017569	0.0048702	0.019474	0.048046	0.047595	0.10816	0.031373	0.022457	0.0057491	0.0024699	3
0.044622	0.071009	0.027264	0.073022	0.13996	0.094781	0.04345	0.050177	0.029416	0.029053	0.027804	0.02156	0.012715	0.014828	0.04365	0.22122	0.20962	0.028438	0.017257	0.016555	0.0036321	0.006512	0.0073054	0.020253	0.049016	0.095077	0.078968	0.03061	0.0052189	0.0020542	0.0049201	0.00433	0.013107	0.049332	0.039577	0.11766	0.037147	0.025178	0.0070289	0.0029176	3
0.0497	0.06809	0.023762	0.083276	0.13579	0.090347	0.039614	0.044333	0.030059	0.033294	0.029171	0.01796	0.012226	0.016575	0.081463	0.25294	0.15164	0.019849	0.017808	0.015583	0.0057194	0.0047262	0.0067933	0.021971	0.053705	0.10139	0.072581	0.027141	0.0052539	0.0014574	0.0048595	0.0049594	0.021553	0.040426	0.059546	0.10932	0.031992	0.020408	0.006473	0.0027433	3
0.022465	0.027709	0.037006	0.071777	0.041639	0.028789	0.12855	0.11514	0.058599	0.045296	0.021844	0.019108	0.015448	0.013474	0.01873	0.090482	0.24145	0.12243	0.019222	0.016921	0.0054213	0.0047858	0.0084447	0.026346	0.085392	0.085622	0.046554	0.0174	0.0066722	0.0016148	0.0011113	0.0055567	0.0096883	0.017995	0.047655	0.0367	0.082214	0.07443	0.012904	0.0012447	3
0.027937	0.032176	0.029741	0.061414	0.053072	0.023493	0.10866	0.12504	0.072541	0.036064	0.021388	0.014697	0.011681	0.017164	0.096714	0.24486	0.12953	0.019457	0.017576	0.02006	0.0012767	0.0051209	0.011493	0.057579	0.10549	0.056171	0.025852	0.014582	0.005654	0.004044	0.0018032	0.006971	0.012065	0.020444	0.054149	0.032539	0.1109	0.04251	0.0070242	0.0021403	3
0.031235	0.038548	0.030075	0.033675	0.029645	0.062044	0.051762	0.023858	0.11492	0.12439	0.021393	0.017188	0.013356	0.018873	0.092938	0.20767	0.12946	0.017937	0.018011	0.019652	0.0016632	0.0046364	0.024384	0.10068	0.056844	0.030704	0.02079	0.020107	0.009702	0.0020224	0.001876	0.0055231	0.012651	0.029886	0.026412	0.052591	0.03039	0.095878	0.015705	0.00185	3
0.029284	0.029123	0.030437	0.056159	0.064535	0.022163	0.086527	0.1292	0.080695	0.042213	0.01919	0.022747	0.017021	0.013614	0.014253	0.038772	0.21656	0.18034	0.03013	0.019187	0.00476	0.0041971	0.0078934	0.021515	0.085702	0.086511	0.044546	0.017529	0.011065	0.0024714	0.0014028	0.005376	0.011291	0.017508	0.029037	0.055851	0.041832	0.10268	0.0213	0.0014774	3
0.02851	0.039414	0.029071	0.030389	0.029635	0.059161	0.059604	0.023031	0.10397	0.12703	0.02087	0.016399	0.012683	0.017574	0.089496	0.20594	0.12698	0.017915	0.019305	0.018656	0.0020741	0.0042866	0.024536	0.097995	0.056334	0.02832	0.020992	0.021653	0.0085797	0.0018758	0.0015253	0.00555	0.011796	0.028064	0.026357	0.054893	0.027233	0.095859	0.014912	0.0017592	3
0.034061	0.037966	0.02511	0.028835	0.034249	0.069054	0.048223	0.026264	0.12476	0.11461	0.013892	0.019531	0.016219	0.014227	0.016808	0.060171	0.2018	0.15274	0.022053	0.019622	0.0010784	0.0046416	0.0069856	0.059962	0.087803	0.054118	0.021282	0.018261	0.016716	0.0018057	0.001629	0.0048274	0.0093119	0.018202	0.033487	0.040463	0.037857	0.064196	0.061889	0.001859	3
0.025591	0.017731	0.034888	0.036109	0.029111	0.031381	0.034765	0.072711	0.044109	0.028907	0.02247	0.014799	0.016735	0.021361	0.091543	0.098342	0.044777	0.015958	0.017551	0.017587	0.0016595	0.0049929	0.011735	0.053378	0.033542	0.024001	0.027475	0.0161	0.0036977	0.0018984	0.0017308	0.0060234	0.013938	0.015994	0.034183	0.025369	0.053786	0.017168	0.0063208	0.0020799	3
0.030757	0.026614	0.021141	0.037376	0.035644	0.026141	0.030303	0.041658	0.072996	0.032192	0.023697	0.020425	0.0168	0.018546	0.033746	0.12167	0.068427	0.030034	0.015658	0.015509	0.00089481	0.0081536	0.010186	0.047676	0.029621	0.026928	0.030025	0.017457	0.0039559	0.0018208	0.0029251	0.0057201	0.013736	0.019543	0.021637	0.035983	0.032065	0.039299	0.0056371	0.0013442	3
0.034975	0.022276	0.025053	0.03902	0.030645	0.028994	0.026764	0.052665	0.063659	0.02173	0.015416	0.021451	0.015517	0.017332	0.020219	0.070287	0.11164	0.042756	0.018539	0.016804	0.0008321	0.0040169	0.0081506	0.032774	0.045592	0.023094	0.025875	0.025362	0.0047781	0.001838	0.002519	0.0051207	0.011495	0.021357	0.018813	0.034455	0.02656	0.042572	0.0075588	0.0020404	3
0.023939	0.031966	0.019748	0.029673	0.038505	0.028146	0.029515	0.027958	0.057483	0.05633	0.021993	0.015433	0.019355	0.02312	0.084495	0.095953	0.042512	0.014775	0.01465	0.016804	0.0013212	0.0049959	0.026413	0.043023	0.02253	0.027556	0.0314	0.0092878	0.0037806	0.0016479	0.0022181	0.006557	0.014847	0.020101	0.019877	0.033311	0.033304	0.036041	0.0056031	0.0015387	3
0.027446	0.030527	0.021413	0.036414	0.044151	0.026579	0.028858	0.031487	0.066239	0.05081	0.023199	0.021507	0.016416	0.020125	0.026723	0.10472	0.085543	0.043727	0.012834	0.016554	0.0008298	0.0073153	0.01033	0.05009	0.029231	0.027813	0.034182	0.016883	0.0039971	0.0019431	0.0032679	0.0062754	0.011767	0.021484	0.020372	0.038171	0.02195	0.04946	0.0058634	0.0016902	3
0.036314	0.026632	0.038541	0.031059	0.029647	0.031583	0.021501	0.034273	0.040974	0.02395	0.019261	0.0216	0.017808	0.018435	0.039933	0.052223	0.033735	0.038172	0.049027	0.028495	0.0011168	0.0054994	0.0090883	0.017404	0.029947	0.03796	0.028554	0.012264	0.0047551	0.01049	0.0011236	0.0054407	0.013923	0.026027	0.027902	0.025197	0.019282	0.014858	0.023398	0.0015444	3
0.023545	0.033984	0.029827	0.026036	0.031857	0.023112	0.027013	0.042999	0.027392	0.026068	0.022145	0.014988	0.019438	0.046071	0.042077	0.039387	0.042904	0.037824	0.012358	0.016708	0.001297	0.005117	0.010524	0.020083	0.032187	0.039016	0.023092	0.0084027	0.0045665	0.001543	0.0013412	0.0079681	0.022425	0.017731	0.021184	0.020863	0.018222	0.028957	0.0062302	0.0020752	3
0.079359	0.062858	0.025111	0.03299	0.030814	0.025575	0.030669	0.023807	0.027716	0.038639	0.017821	0.018657	0.021905	0.061835	0.050589	0.035389	0.037581	0.049296	0.03998	0.048121	0.0016866	0.0052576	0.0099713	0.020861	0.038426	0.029783	0.028879	0.015084	0.02413	0.017115	0.0012806	0.010752	0.023977	0.027325	0.039219	0.037766	0.019846	0.012347	0.017702	0.0018412	3
0.061226	0.089423	0.028969	0.030955	0.041002	0.027956	0.031523	0.028521	0.022593	0.038057	0.019045	0.017865	0.023248	0.058478	0.06057	0.039502	0.040151	0.046902	0.044561	0.050332	0.0014282	0.0048936	0.010711	0.019764	0.043346	0.031617	0.029193	0.019455	0.027432	0.012238	0.001504	0.0097968	0.02428	0.024696	0.041013	0.041631	0.023815	0.011996	0.01584	0.0017333	3
0.056582	0.049211	0.023809	0.035285	0.035182	0.028497	0.030474	0.023258	0.025466	0.044121	0.016466	0.018769	0.021023	0.022482	0.045257	0.070488	0.036282	0.036691	0.04429	0.045033	0.0012072	0.0046324	0.010539	0.017138	0.030941	0.037669	0.031291	0.020616	0.016046	0.0071991	0.00095736	0.0051253	0.022167	0.027177	0.035021	0.030166	0.018017	0.014631	0.011733	0.013515	3
0.1404	0.10698	0.052528	0.055519	0.036539	0.035544	0.032091	0.040641	0.027318	0.03442	0.03862	0.023223	0.032257	0.02008	0.015985	0.015826	0.12168	0.22222	0.049988	0.018762	0.0057209	0.0091183	0.014176	0.020172	0.020072	0.030879	0.039038	0.06392	0.076354	0.0021033	0.0015136	0.0075213	0.013081	0.058382	0.098551	0.039415	0.027592	0.021328	0.011825	0.0021113	3
0.12014	0.068223	0.050858	0.043328	0.033766	0.033202	0.041168	0.034055	0.028744	0.028672	0.040699	0.025368	0.029408	0.022918	0.016751	0.016427	0.066965	0.16819	0.082079	0.022212	0.005035	0.0079283	0.013622	0.022061	0.022254	0.028972	0.027932	0.044888	0.062752	0.0066281	0.0018719	0.010416	0.012598	0.048621	0.073386	0.035485	0.020624	0.025845	0.0085986	0.004034	3
0.099219	0.04547	0.041871	0.032983	0.03285	0.036198	0.043353	0.02578	0.022462	0.034885	0.025231	0.027821	0.017813	0.014849	0.017824	0.095832	0.13637	0.038571	0.024924	0.023659	0.0017155	0.0085504	0.012885	0.014578	0.027887	0.032706	0.03862	0.054405	0.016424	0.0018974	0.0019418	0.0048079	0.019678	0.062771	0.034458	0.027635	0.027931	0.013943	0.0087287	0.0072495	3
[truncated: 872 more rows]

## Sheet: SBF
Feature 1	Feature 2	Feature 3	Feature 4	Feature 5	Feature 6	Feature 7	Feature 8	Feature 9	Feature 10	Feature 11	Feature 12	Feature 13	Feature 14	Feature 15	Feature 16	Feature 17	Feature 18	Feature 19	Feature 20	Feature 21	Feature 22	Feature 23	Feature 24	Feature 25	Feature 26	Feature 27	Feature 28	Feature 29	Feature 30	Feature 31	Feature 32	Feature 33	Feature 34	Feature 35	Feature 36	Feature 37	Feature 38	Feature 39	Feature 40	Class labels
[truncated: 2,000 more rows]
